# Supplementary material for: Novel charged sodium and calcium channel inhibitor active against neurogenic inflammation
Source: eLife. 2019 Nov 25;8:e48118. doi: 10.7554/eLife.48118 (PMC6877086; doi:10.7554/eLife.48118)
Supplement: Source data 1. [file elife-48118-data1.xlsx]

## Sheet: Fig1A
Time(min)	NNCB-2	100 uM			mean	sdev	count	SEM		NNCB-2	30 uM			mean	sdev	count	SEM		NNCB-2	10 uM			mean	sdev	count	SEM		NNCB-2	3 uM			mean	sdev	count	SEM
0.05	1	1	1	1	1	0	4	0		1	1	1	1	1	0	4	0		1	1	1	1	1					1	1	1	1	1	0	4	0
0.1	1.0249	0.9495	1.0143	1.0001	0.9972	0.0333836	4	0.0166918		0.9896	0.9958	1.0557	0.9512	0.998075	0.0431853	4	0.0215926		0.9963	0.9814	1.0115	1.0805	1.01743	0.0438088	4	0.0219044		1.0252	0.9653	0.9352	1.0313	0.98925	0.0467462	4	0.0233731
0.15	1.0317	0.8998	1.0471	0.9964	0.99375	0.0661313	4	0.0330657		1.0015	0.9982	1.0546	0.9181	0.9931	0.0562845	4	0.0281422		0.9866	0.9772	1.0029	1.0594	1.00652	0.0368143	4	0.0184071		1.0621	0.9788	0.9182	1.032	0.997775	0.0632489	4	0.0316245
0.2	1.0203	0.8905	1.0545	0.9837	0.98725	0.0706825	4	0.0353412		0.9927	0.9914	1.0573	0.9274	0.9922	0.0530344	4	0.0265172		0.9687	0.9591	1.0018	1.0933	1.00572	0.0611815	4	0.0305907		1.0829	0.9644	0.9003	1.0193	0.991725	0.0778427	4	0.0389213
0.25	1.0216	0.8776	0.96	0.9728	0.958	0.0598113	4	0.0299056		0.9954	0.9742	1.0693	0.9255	0.9911	0.0597849	4	0.0298924		0.9595	0.9469	0.9952	1.1156	1.0043	0.0769682	4	0.0384841		1.0882	0.9562	0.8972	1.0219	0.990875	0.0824865	4	0.0412432
0.3	0.6526	0.7596	0.2969	0.8751	0.64605	0.249871	4	0.124935		0.9823	0.8652	1.0557	0.9038	0.95175	0.0847133	4	0.0423566		0.9575	0.9453	0.974	1.0757	0.988125	0.059556	4	0.029778		1.0893	0.9648	0.8802	1.0194	0.988425	0.0883289	4	0.0441645
0.35	0.1683	0.3946	0.1529	0.1947	0.227625	0.112647	4	0.0563235		0.4942	0.5168	0.5538	0.7758	0.58515	0.129453	4	0.0647263		0.8817	0.9352	0.9812	1.0427	0.9602	0.0683971	4	0.0341986		1.0983	0.9494	0.8726	1.0346	0.988725	0.0985608	4	0.0492804
0.4	0.0808	0.222	0.0996	0.1007	0.125775	0.0647968	4	0.0323984		0.2256	0.3375	0.3212	0.3449	0.3073	0.0553591	4	0.0276796		0.6393	0.8284	0.8988	1.0129	0.84485	0.156709	4	0.0783543		1.0959	0.8816	0.8389	1.0042	0.95515	0.117104	4	0.0585521
0.45	0.0496	0.1515	0.0707	0.067	0.0847	0.0454736	4	0.0227368		0.1433	0.2567	0.2491	0.2453	0.2236	0.0537427	4	0.0268714		0.5334	0.6959	0.7115	0.8663	0.701775	0.136073	4	0.0680366		1.0597	0.8408	0.8107	0.95	0.9153	0.113353	4	0.0566766
0.5	0.0241	0.1118	0.0416	0.0542	0.057925	0.0379782	4	0.0189891		0.1028	0.1825	0.1906	0.1982	0.168525	0.0442831	4	0.0221416		0.4972	0.6175	0.6057	0.8417	0.640525	0.144633	4	0.0723166		1.0102	0.8172	0.7918	0.9022	0.88035	0.0986027	4	0.0493013
0.55	-0.00012	0.0888	0.0155	0.0452	0.037345	0.0391158	4	0.0195579		0.0719	0.1359	0.1577	0.1767	0.13555	0.0455902	4	0.0227951		0.4616	0.5571	0.5461	0.7412	0.5765	0.117797	4	0.0588987		0.9811	0.7817	0.7822	0.9027	0.861925	0.0977367	4	0.0488684
0.6	-0.00924	0.0642	0.008371	0.0363	0.0249077	0.0322139	4	0.0161069		0.06	0.1105	0.1447	0.1501	0.116325	0.041442	4	0.020721		0.4344	0.5193	0.4993	0.7285	0.545375	0.127349	4	0.0636743		0.9581	0.7728	0.7579	0.8738	0.84065	0.0937099	4	0.0468549
0.65	-0.0142	0.0394	0.0184	0.0317	0.018825	0.0236638	4	0.0118319		0.0489	0.0842	0.1194	0.1378	0.097575	0.0393384	4	0.0196692		0.4282	0.4856	0.4764	0.6707	0.515225	0.106663	4	0.0533314		0.9502	0.7595	0.7634	0.851	0.831025	0.0899827	4	0.0449913
0.7	-0.0233	0.0402	0.0242	0.0358	0.019225	0.0291422	4	0.0145711		0.0299	0.0664	0.1062	0.1336	0.084025	0.0454223	4	0.0227112		0.4107	0.4618	0.4441	0.6381	0.488675	0.101845	4	0.0509224		0.9384	0.7432	0.755	0.8279	0.816125	0.0897109	4	0.0448555
0.75	-0.0294	0.0299	-0.00185	0.0238	0.0056125	0.0270939	4	0.0135469		0.0254	0.0459	0.1004	0.1263	0.0745	0.0468431	4	0.0234215		0.3952	0.4295	0.4357	0.5995	0.464975	0.0914349	4	0.0457175		0.921	0.7374	0.7505	0.82	0.807225	0.0840659	4	0.0420329
0.8	-0.0327	0.0196	-0.0154	0.0233	-0.0013	0.0272442	4	0.0136221		0.0204	0.047	0.0997	0.1195	0.07165	0.0458643	4	0.0229322		0.3901	0.4208	0.4223	0.5812	0.4536	0.0863511	4	0.0431756		0.9128	0.7345	0.742	0.8267	0.804	0.0837197	4	0.0418599
0.85	-0.0289	0.0126	-0.0216	0.02	-0.004475	0.0243614	4	0.0121807		0.0102	0.039	0.0929	0.1225	0.06615	0.0508541	4	0.025427		0.3815	0.409	0.4183	0.5784	0.4468	0.0891137	4	0.0445568		0.8827	0.7438	0.7288	0.8243	0.7949	0.0720037	4	0.0360019
0.9	-0.029	0.0159	-0.0308	0.0262	-0.004425	0.0297241	4	0.0148621		0.0114	0.0404	0.0916	0.1194	0.0657	0.0487958	4	0.0243979		0.3805	0.3992	0.4026	0.5511	0.43335	0.079099	4	0.0395495		0.8705	0.7453	0.7213	0.8339	0.79275	0.0709342	4	0.0354671
0.95	-0.0327	0.0251	-0.0401	0.005516	-0.010546	0.031053	4	0.0155265		0.003695	0.0203	0.0874	0.1184	0.0574488	0.0544109	4	0.0272054		0.3723	0.3953	0.3897	0.5433	0.42515	0.0793731	4	0.0396866		0.8633	0.7489	0.7098	0.8207	0.785675	0.0691901	4	0.034595
1	-0.0358	0.0185	-0.0346	0.011	-0.010225	0.0290049	4	0.0145024		0.01	0.0677	0.0939	0.1244	0.074	0.0485519	4	0.0242759		0.3631	0.3917	0.3781	0.5429	0.41895	0.0834548	4	0.0417274		0.8296	0.7307	0.7024	0.8251	0.77195	0.0650313	4	0.0325157
1.05	-0.0302	0.0136	-0.0519	0.0219	-0.01165	0.0352483	4	0.0176242		0.008867	0.0959	0.0988	0.1161	0.0799167	0.0481987	4	0.0240993		0.3626	0.3789	0.3817	0.518	0.4103	0.0722922	4	0.0361461		0.8074	0.7173	0.6963	0.8287	0.762425	0.0653807	4	0.0326903
1.1	-0.0316	0.008702	-0.0654	0.025	-0.0158245	0.0407218	4	0.0203609		0.006834	0.1023	0.0929	0.1167	0.0796835	0.0495428	4	0.0247714		0.3534	0.3718	0.3705	0.5413	0.40925	0.0884317	4	0.0442158		0.7547	0.6978	0.6874	0.823	0.740725	0.062318	4	0.031159
1.15	-0.0224	0.0217	-0.0645	0.0243	-0.010225	0.0420523	4	0.0210261		0.015	0.086	0.1127	0.1053	0.07975	0.0446099	4	0.022305		0.3586	0.369	0.3809	0.554	0.415625	0.0926988	4	0.0463494		0.7454	0.7049	0.6767	0.8307	0.739425	0.0670652	4	0.0335326
1.2	-0.0298	0.0197	-0.0608	0.028	-0.010725	0.0420185	4	0.0210093		0.0183	0.0888	0.1261	0.1122	0.08635	0.0479065	4	0.0239532		0.3754	0.364	0.3767	0.5039	0.405	0.0661797	4	0.0330899		0.7253	0.7076	0.6793	0.8327	0.736225	0.0670488	4	0.0335244
1.25	-0.0239	0.0154	-0.0496	0.0189	-0.0098	0.0328714	4	0.0164357		0.0133	0.0869	0.1137	0.1073	0.0803	0.0461054	4	0.0230527		0.3783	0.3759	0.3746	0.5194	0.41205	0.0715831	4	0.0357915		0.7095	0.6983	0.6677	0.813	0.722125	0.0631067	4	0.0315534
1.3	-0.0358	0.0108	-0.0482	0.015	-0.01455	0.032144	4	0.016072		0.0181	0.0897	0.1237	0.0992	0.082675	0.0453704	4	0.0226852		0.3715	0.373	0.3763	0.5134	0.40855	0.0699287	4	0.0349644		0.6929	0.7103	0.6585	0.8131	0.7187	0.0665122	4	0.0332561
1.35	-0.0313	0.005561	-0.0381	0.014	-0.0124598	0.0260592	4	0.0130296		0.0191	0.0846	0.1197	0.0937	0.079275	0.0427849	4	0.0213925		0.3743	0.3668	0.3616	0.4994	0.400525	0.0661225	4	0.0330612		0.7008	0.6895	0.6535	0.8214	0.7163	0.0729117	4	0.0364558
1.4	-0.0442	0.0121	-0.0216	0.0371	-0.00415	0.0359357	4	0.0179679		0.0255	0.0852	0.1344	0.0948	0.084975	0.0450062	4	0.0225031		0.3764	0.3752	0.371	0.4906	0.4033	0.058246	4	0.029123		0.6857	0.6885	0.6407	0.8159	0.7077	0.0753854	4	0.0376927
1.45	-0.0374	0.003104	-0.0222	0.0516	-0.001224	0.0389778	4	0.0194889		0.0237	0.0829	0.1314	0.0973	0.083825	0.0449475	4	0.0224737		0.3657	0.3837	0.3681	0.5065	0.406	0.0674736	4	0.0337368		0.6843	0.6795	0.6413	0.8124	0.704375	0.0745422	4	0.0372711
1.5	-0.0289	0.009138	0.005104	0.0694	0.0136855	0.0408736	4	0.0204368		0.0196	0.0858	0.1314	0.0891	0.081475	0.0461803	4	0.0230902		0.3807	0.3773	0.3667	0.4858	0.402625	0.0557696	4	0.0278848		0.6914	0.6758	0.6367	0.8303	0.70855	0.0843646	4	0.0421823
1.55										0.0284	0.0893	0.1354	0.0963	0.08735	0.044226	4	0.022113		0.3782	0.3902	0.3654	0.4542	0.397	0.039455	4	0.0197275		0.6963	0.6569	0.6275	0.8443	0.70625	0.0962528	4	0.0481264
1.6										0.0268	0.0858	0.1297	0.0864	0.082175	0.0422532	4	0.0211266		0.388	0.3843	0.3735	0.4437	0.397375	0.03149	4	0.015745		0.7032	0.6573	0.6188	0.8213	0.70015	0.0878267	4	0.0439133
1.65										0.042	0.0875	0.1335	0.0916	0.08865	0.0374066	4	0.0187033		0.387	0.386	0.3515	0.4294	0.388475	0.0318868	4	0.0159434		0.7143	0.6651	0.6217	0.8179	0.70475	0.0843871	4	0.0421936
1.7										0.0731	0.0814	0.13	0.0942	0.094675	0.0250984	4	0.0125492		0.3919	0.3885	0.3728	0.4546	0.40195	0.0360724	4	0.0180362		0.7099	0.667	0.6122	0.8257	0.7037	0.0906303	4	0.0453152
1.75										0.0836	0.0852	0.1314	0.0952	0.09885	0.0222988	4	0.0111494		0.4079	0.3893	0.3639	0.4339	0.39875	0.0295695	4	0.0147848		0.7159	0.6536	0.6109	0.808	0.6971	0.0855861	4	0.042793
1.8											0.0843	0.1427	0.0932	0.106733	0.0314643	3	0.0181659		0.4144	0.3931	0.3698	0.4024	0.394925	0.0188834	4	0.0094417		0.7134	0.6612	0.6022	0.8404	0.7043	0.101469	4	0.0507346
1.85											0.0829	0.1266	0.0941	0.1012	0.0226987	3	0.0131051		0.4251	0.4031	0.3688	0.4323	0.407325	0.0285291	4	0.0142645		0.7082	0.6635	0.5941	0.8121	0.694475	0.091394	4	0.045697
1.9											0.0818	0.1214	0.0796	0.0942667	0.0235239	3	0.0135815		0.4374	0.3953	0.3623	0.4157	0.402675	0.0319375	4	0.0159687		0.722	0.6443	0.5813	0.8097	0.689325	0.0987496	4	0.0493748
1.95											0.075	0.1228	0.0831	0.0936333	0.0255817	3	0.0147696		0.4496	0.4053	0.3622	0.387	0.401025	0.0368867	4	0.0184434		0.7217	0.6469	0.5808	0.8123	0.690425	0.0995719	4	0.049786
2											0.0851	0.0999	0.0941	0.0930333	0.00745743	3	0.00430555		0.4536	0.3948	0.3559	0.3944	0.399675	0.0403144	4	0.0201572		0.7244	0.6655	0.5749	0.8205	0.696325	0.103121	4	0.0515605
2.05											0.0799	0.1196	0.0725	0.0906667	0.0253287	3	0.0146235		0.4605	0.3878	0.3562	0.3837	0.39705	0.0445661	4	0.022283		0.7206	0.6461	0.5675	0.8232	0.68935	0.10895	4	0.054475
2.1											0.0757	0.0982	0.0819	0.0852667	0.0116217	3	0.00670978		0.4606	0.3892	0.362	0.3789	0.397675	0.0434227	4	0.0217113		0.715	0.6605	0.5664	0.8001	0.6855	0.0980021	4	0.049001
2.15											0.0778	0.0986	0.0845	0.0869667	0.0106171	3	0.0061298		0.4668	0.401	0.3566	0.3447	0.392275	0.0552756	4	0.0276378		0.7207	0.6627	0.5516	0.798	0.68325	0.103801	4	0.0519006
2.2											0.0808	0.0937	0.084	0.0861667	0.00671739	3	0.00387829		0.4576	0.3959	0.3642	0.3694	0.396775	0.0428601	4	0.0214301		0.7069	0.6748	0.5516	0.7824	0.678925	0.0961221	4	0.048061
2.25											0.0809	0.0844	0.0761	0.0804667	0.00416693	3	0.00240578		0.4651	0.3935	0.3606	0.3777	0.399225	0.0459257	4	0.0229628		0.7066	0.681	0.5456	0.7888	0.6805	0.101009	4	0.0505044
2.3											0.0739	0.0815	0.0727	0.0760333	0.00477214	3	0.0027552		0.4613	0.4002	0.3699	0.3507	0.395525	0.0483533	4	0.0241767		0.7182	0.6875	0.5392	0.7638	0.677175	0.0971779	4	0.048589
2.35											0.0667	0.084	0.0804	0.0770333	0.00912816	3	0.00527015		0.4624	0.3921	0.3709	0.3254	0.3877	0.0570467	4	0.0285234		0.713	0.6875	0.5455	0.7782	0.68105	0.0981059	4	0.049053
2.4											0.0701	0.0666	0.0712	0.0693	0.00240208	3	0.00138684		0.4593	0.391	0.3734	0.345	0.392175	0.0485974	4	0.0242987		0.6929	0.7035	0.5332	0.7897	0.679825	0.106931	4	0.0534656
2.45											0.077	0.0735	0.0745	0.075	0.00180278	3	0.00104083		0.4591	0.3911	0.3714	0.3038	0.38135	0.0639091	4	0.0319546		0.683	0.6964	0.5379	0.7889	0.67655	0.103734	4	0.0518668
2.5											0.0732	0.0443	0.0685	0.062	0.0155077	3	0.0089534		0.4525	0.3839	0.3796	0.3285	0.386125	0.0509045	4	0.0254523		0.6778	0.7216	0.5413	0.8088	0.687375	0.111572	4	0.055786
2.55											0.0714	0.044	0.0815	0.0656333	0.0194037	3	0.0112027		0.4512	0.3849	0.3763	0.34	0.3881	0.046349	4	0.0231745		0.6753	0.7257	0.526	0.7915	0.679625	0.112928	4	0.0564641
2.6											0.0716	0.0415	0.0731	0.0620667	0.017827	3	0.0102924		0.4442	0.38	0.3744	0.3646	0.3908	0.0361644	4	0.0180822		0.6686	0.7226	0.5312	0.8139	0.684075	0.11825	4	0.0591248
2.65											0.0689	-0.00247	0.068	0.04481	0.0409482	3	0.0236414		0.4363	0.374	0.3636	0.3478	0.380425	0.0387761	4	0.0193881		0.672	0.716	0.5287	0.792	0.677175	0.1107	4	0.0553502
2.7											0.0636	0.022	0.0693	0.0516333	0.025821	3	0.0149078		0.4133	0.3665	0.3588	0.3494	0.372	0.0284074	4	0.0142037		0.6654	0.7072	0.5234	0.8107	0.676675	0.119045	4	0.0595223
2.75											0.0675	0.0158	0.071	0.0514333	0.030909	3	0.0178453		0.4098	0.3658	0.3715	0.2823	0.35735	0.0537126	4	0.0268563		0.6624	0.7258	0.5192	0.7742	0.6704	0.110708	4	0.0553542
2.8											0.0536	0.0213	0.0577	0.0442	0.0199377	3	0.011511		0.4129	0.3525	0.3856	0.2944	0.36135	0.0510101	4	0.025505		0.6442	0.722	0.5186	0.7509	0.658925	0.103836	4	0.051918
2.85											0.0554	0.0266	0.0493	0.0437667	0.0151764	3	0.0087621		0.4016	0.3553	0.3817	0.2754	0.3535	0.0554127	4	0.0277063		0.6273	0.7254	0.5123	0.7789	0.660975	0.117325	4	0.0586623
2.9											0.0559	0.036	0.0542	0.0487	0.0110313	3	0.00636894		0.4004	0.351	0.3867	0.3086	0.361675	0.041056	4	0.020528		0.6199	0.7322	0.5026	0.7708	0.656375	0.120858	4	0.0604288
2.95											0.0501	0.0315	0.0612	0.0476	0.015007	3	0.00866429		0.3956	0.345	0.389	0.2534	0.34575	0.0655354	4	0.0327677		0.6199	0.7298	0.5039	0.7447	0.649575	0.111932	4	0.0559662
3											0.0518	0.0287	0.0544	0.0449667	0.0141472	3	0.00816789		0.3701	0.3387	0.3739	0.2473	0.3325	0.0589497	4	0.0294748		0.5999	0.7413	0.5054	0.7495	0.649025	0.117829	4	0.0589147
3.05											0.0544	0.0244	0.0477	0.0421667	0.0157469	3	0.00909145		0.3737	0.3278	0.3697	0.2284	0.3249	0.0675997	4	0.0337998		0.59	0.7431	0.5074	0.7677	0.65205	0.124417	4	0.0622086
3.1											0.0497	0.0171	0.0511	0.0393	0.0192385	3	0.0111074		0.3541	0.3194	0.3836	0.2076	0.316175	0.0769921	4	0.0384961		0.5809	0.7332	0.5009	0.7542	0.6423	0.121858	4	0.0609292
3.15											0.0513	0.0231	0.0463	0.0402333	0.015047	3	0.00868741		0.3571	0.3184	0.3791	0.2471	0.325425	0.0579323	4	0.0289662		0.5651	0.7398	0.5021	0.7347	0.635425	0.120376	4	0.0601878
3.2											0.0451	0.0221	0.0396	0.0356	0.0120104	3	0.00693421		0.357	0.314	0.3748	0.2264	0.31805	0.0662163	4	0.0331081		0.554	0.7319	0.4852	0.7502	0.630325	0.131116	4	0.065558
3.25											0.0367	0.028	0.0404	0.0350333	0.00636579	3	0.00367529		0.3563	0.3092	0.3679	0.2361	0.317375	0.0598342	4	0.0299171		0.5945	0.7338	0.4829	0.706	0.6293	0.114669	4	0.0573346
3.3											0.0589	0.0332	0.0292	0.0404333	0.0161172	3	0.00930526		0.3561	0.3115	0.3795	0.2451	0.32305	0.0591284	4	0.0295642		0.5751	0.7221	0.4827	0.7517	0.6329	0.126453	4	0.0632264
3.35											0.0644	0.0468	0.0627	0.0579667	0.0097079	3	0.00560486		0.4221	0.332	0.3768	0.262	0.348225	0.0682448	4	0.0341224		0.5687	0.7417	0.4532	0.8218	0.64635	0.166544	4	0.083272
3.4											0.0751	0.0751	0.0866	0.0789333	0.00663953	3	0.00383333		0.4686	0.3573	0.3653	0.2836	0.3687	0.0760779	4	0.0380389		0.5525	0.812	0.4807	0.8489	0.673525	0.184174	4	0.092087
3.45											0.0871	0.1059	0.107	0.1	0.0111853	3	0.00645781		0.4508	0.3723	0.3682	0.3138	0.376275	0.0563859	4	0.0281929		0.5655	0.8486	0.5238	0.8624	0.700075	0.180363	4	0.0901815
3.5											0.0935	0.1229	0.0992	0.1052	0.0155913	3	0.00900167		0.476	0.3762	0.3759	0.3467	0.3937	0.0565844	4	0.0282922		0.6158	0.8775	0.5396	0.8645	0.72435	0.172252	4	0.0861262
3.55											0.1064	0.1577	0.1288	0.130967	0.0257185	3	0.0148486		0.489	0.3583	0.3626	0.3624	0.393075	0.0639807	4	0.0319903		0.6463	0.8858	0.5514	0.8848	0.742075	0.16986	4	0.0849299
3.6											0.1201	0.1833	0.1466	0.15	0.0317369	3	0.0183233		0.5099	0.3378	0.3687	0.3496	0.3915	0.0799535	4	0.0399768		0.6695	0.9147	0.5618	0.8592	0.7513	0.164259	4	0.0821297
3.65											0.1283	0.23	0.1597	0.172667	0.0520752	3	0.0300656		0.554	0.3244	0.3625	0.3998	0.410175	0.100703	4	0.0503517		0.6582	0.9432	0.5774	0.8906	0.76735	0.177114	4	0.0885572
3.7											0.1347	0.2649	0.1553	0.184967	0.0699864	3	0.0404067		0.5259	0.3154	0.4133	0.394	0.41215	0.0868531	4	0.0434265		0.6762	0.9479	0.5728	0.8414	0.759575	0.16733	4	0.083665
3.75											0.1473	0.3194	0.1782	0.214967	0.0917521	3	0.0529731		0.5335	0.3059	0.45	0.4269	0.429075	0.0940199	4	0.04701		0.7102	0.9715	0.5937	0.8375	0.778225	0.162835	4	0.0814175
3.8											0.1659	0.373	0.1858	0.241567	0.114259	3	0.0659673		0.5551	0.3007	0.4825	0.4458	0.446025	0.107	4	0.0535001		0.7063	0.9713	0.578	0.8033	0.764725	0.165772	4	0.0828859
3.85											0.1763	0.4138	0.1898	0.259967	0.133394	3	0.0770153		0.553	0.2992	0.5118	0.4533	0.454325	0.111213	4	0.0556065		0.7275	0.975	0.5803	0.8311	0.778475	0.166597	4	0.0832983
3.9											0.1886	0.4688	0.192	0.283133	0.160801	3	0.0928385		0.5773	0.2892	0.5274	0.4295	0.45585	0.126933	4	0.0634666		0.7295	0.9909	0.5823	0.7904	0.773275	0.169353	4	0.0846766
3.95											0.214	0.4956	0.2071	0.305567	0.16461	3	0.0950375		0.5873	0.2832	0.551	0.4601	0.4704	0.135784	4	0.067892		0.7392	1.0112	0.5879	0.8621	0.8001	0.179949	4	0.0899745
4											0.2249	0.576	0.2102	0.337033	0.207082	3	0.119559		0.5925	0.2888	0.5748	0.4511	0.4768	0.140232	4	0.070116		0.7497	1.0087	0.6088	0.8666	0.80845	0.170091	4	0.0850457
4.05											0.2304	0.6103	0.2357	0.3588	0.217822	3	0.125759		0.6026	0.2924	0.5776	0.459	0.4829	0.141607	4	0.0708035		0.7437	1.0373	0.5986	0.8624	0.8105	0.185738	4	0.0928689
4.1											0.2565	0.6499	0.2373	0.381233	0.23287	3	0.134448		0.6101	0.2944	0.5893	0.4552	0.48725	0.145745	4	0.0728724		0.7601	1.0237	0.5964	0.8427	0.805725	0.177744	4	0.088872
4.15											0.2669	0.6757	0.2538	0.3988	0.239892	3	0.138502		0.6089	0.2876	0.5907	0.4929	0.495025	0.147367	4	0.0736834		0.7566	1.04	0.6079	0.8621	0.81665	0.181781	4	0.0908907
4.2											0.2718	0.714	0.2542	0.413333	0.260534	3	0.150419		0.6197	0.2941	0.6022	0.4761	0.498025	0.150248	4	0.075124		0.7675	1.0296	0.6072	0.8493	0.8134	0.175743	4	0.0878714
4.25											0.3019	0.7445	0.2825	0.442967	0.261316	3	0.150871		0.6417	0.298	0.6262	0.4623	0.50705	0.161278	4	0.080639		0.7816	1.0258	0.6038	0.856	0.8168	0.174953	4	0.0874765
4.3											0.3095	0.7993	0.2847	0.4645	0.29021	3	0.167553		0.6355	0.3005	0.6295	0.4698	0.508825	0.158673	4	0.0793364		0.7823	1.0426	0.6114	0.8558	0.823025	0.178635	4	0.0893173
4.35											0.3218	0.8281	0.3084	0.4861	0.296256	3	0.171044		0.6277	0.297	0.6378	0.4592	0.505425	0.161299	4	0.0806495		0.7823	1.0481	0.594	0.8608	0.8213	0.188135	4	0.0940677
4.4											0.341	0.8392	0.3298	0.503333	0.290923	3	0.167964		0.6419	0.2977	0.6391	0.4738	0.513125	0.163714	4	0.0818571
4.45											0.3599	0.8684	0.3235	0.517267	0.304635	3	0.175881		0.6396	0.3046	0.6526	0.4989	0.523925	0.161934	4	0.0809669
4.5												0.8788	0.3365	0.60765	0.383464	2	0.27115		0.6432	0.3063	0.654	0.4898	0.523325	0.162962	4	0.081481
4.55																			0.6345	0.3023	0.6579	0.506	0.525175	0.1629	4	0.0814498
4.6																			0.6308	0.3097	0.6659	0.4324	0.5097	0.168364	4	0.0841818
4.65																			0.6538	0.3071	0.662	0.4607	0.5209	0.170202	4	0.085101
4.7
4.75
4.8
4.85
4.9
4.95
5
5.05
5.1
5.15
5.2
5.25
5.3
5.35
5.4
5.45
5.5

## Sheet: Fig 1B
HP -70		Con		10 uM NNCB-2		HP -100		Con		10 uM NNCB-2
13o02035		13o02035C005		13o02035C025		13o01031		13o01031C001		13o01031C025
	0	3.92428	0	1.1777			0	1.18625	0	-11.6311
	0.2	2.70357	0.2	-0.958534			0.2	0.27072	0.2	-10.1053
	0.4	4.83981	0.4	-5.53617			0.4	-1.25516	0.4	-8.57938
	0.6	3.31393	0.6	-5.231			0.6	0.575896	0.6	-13.4622
	0.8	5.14498	0.8	-2.48441			0.8	1.18625	0.8	-10.7156
	1	2.09322	1	-2.17924			1	1.7966	1	-8.2742
	1.2	3.00875	1.2	-1.26371			1.2	4.54318	1.2	-8.88455
	1.4	3.31393	1.4	-2.48441			1.4	3.32248	1.4	-14.9881
	1.6	5.14498	1.6	-1.56889			1.6	2.10177	1.6	-15.9036
	1.8	3.6191	1.8	-2.48441			1.8	0.27072	1.8	-15.9036
	2	-0.0430071	2	-4.92582			2	0.881072	2	-19.5657
	2.2	1.78805	2.2	-6.14652			2.2	-0.0344557	2.2	-16.8191
	2.4	3.00875	2.4	-3.39994			2.4	2.10177	2.4	-18.0398
	2.6	5.75533	2.6	-3.39994			2.6	3.0173	2.6	-15.9036
	2.8	3.92428	2.8	-0.958534			2.8	3.93283	2.8	-14.6829
	3	3.6191	3	2.3984			3	4.238	3	-14.0725
	3.2	1.1777	3.2	-4.62064			3.2	1.49142	3.2	-17.1243
	3.4	0.87252	3.4	-7.36723			3.4	1.49142	3.4	-16.2088
	3.6	2.70357	3.6	-4.92582			3.6	1.18625	3.6	-20.1761
	3.8	2.70357	3.8	-3.39994			3.8	3.32248	3.8	-18.9554
	4	1.78805	4	0.567344			4	3.93283	4	-18.6502
	4.2	0.567344	4.2	-1.26371			4.2	3.0173	4.2	-14.6829
	4.4	2.09322	4.4	-5.84135			4.4	2.71213	4.4	-14.0725
	4.6	6.06051	4.6	-6.75687			4.6	2.10177	4.6	-12.8518
	4.8	5.75533	4.8	-4.01029			4.8	-0.949983	4.8	-14.6829
	5	2.09322	5	-1.87406			5	2.10177	5	-15.9036
	5.2	0.87252	5.2	-0.0430071			5.2	3.32248	5.2	-18.9554
	5.4	3.31393	5.4	-1.87406			5.4	4.238	5.4	-18.345
	5.6	3.92428	5.6	-3.70512			5.6	0.27072	5.6	-15.9036
	5.8	4.22945	5.8	-3.70512			5.8	0.575896	5.8	-16.8191
	6	2.3984	6	-3.39994			6	1.49142	6	-15.5984
	6.2	2.09322	6.2	-4.01029			6.2	1.49142	6.2	-13.4622
	6.4	5.45016	6.4	-3.09476			6.4	-0.339632	6.4	-12.8518
	6.6	2.70357	6.6	-5.84135			6.6	-0.339632	6.6	-13.157
	6.8	3.92428	6.8	-7.97758			6.8	1.18625	6.8	-11.6311
	7	3.31393	7	-7.6724			7	1.18625	7	-12.5467
	7.2	4.22945	7.2	-4.62064			7.2	1.7966	7.2	-13.7674
	7.4	3.00875	7.4	-1.56889			7.4	0.575896	7.4	-16.8191
	7.6	3.92428	7.6	-2.17924			7.6	1.7966	7.6	-16.8191
	7.8	1.78805	7.8	-1.56889			7.8	2.71213	7.8	-14.3777
	8	2.70357	8	-7.06205			8	-0.644807	8	-13.7674
	8.2	1.48287	8.2	-8.8931			8.2	-2.78104	8.2	-11.9363
	8.4	4.22945	8.4	-5.53617			8.4	0.575896	8.4	-11.326
	8.6	3.92428	8.6	-4.92582			8.6	0.881072	8.6	-15.5984
	8.8	2.3984	8.8	-5.53617			8.8	1.18625	8.8	-13.4622
	9	6.36568	9	-7.06205			9	1.49142	9	-16.5139
	9.2	4.22945	9.2	-9.50346			9.2	0.881072	9.2	-12.5467
	9.4	1.78805	9.4	-9.19828			9.4	0.27072	9.4	-13.4622
	9.6	0.87252	9.6	-6.75687			9.6	1.49142	9.6	-12.5467
	9.8	-0.0430071	9.8	-4.62064			9.8	-0.339632	9.8	-14.3777
	10	1.1777	10	-3.39994			10	-0.949983	10	-11.9363
	10.2	3.00875	10.2	-5.53617			10.2	-1.25516	10.2	-14.0725
	10.4	4.53463	10.4	-6.4517			10.4	-2.17069	10.4	-13.7674
	10.6	3.31393	10.6	-3.70512			10.6	-0.644807	10.6	-11.9363
	10.8	3.31393	10.8	-2.78959			10.8	-1.25516	10.8	-14.0725
	11	2.3984	11	-5.231			11	-3.08621	11	-13.7674
	11.2	1.78805	11.2	-3.09476			11.2	0.575896	11.2	-13.7674
	11.4	2.09322	11.4	-3.39994			11.4	1.18625	11.4	-14.0725
	11.6	-0.653359	11.6	-4.31547			11.6	0.27072	11.6	-15.2932
	11.8	1.78805	11.8	-5.53617			11.8	-3.69656	11.8	-13.157
	12	1.1777	12	-5.84135			12	-4.30692	12	-12.2415
	12.2	3.00875	12.2	-6.75687			12.2	-1.86551	12.2	-14.9881
	12.4	1.48287	12.4	-5.84135			12.4	0.575896	12.4	-13.157
	12.6	3.00875	12.6	-4.92582			12.6	-1.56033	12.6	-11.9363
	12.8	5.75533	12.8	-6.14652			12.8	0.575896	12.8	-10.7156
	13	5.45016	13	-4.31547			13	-2.17069	13	-12.2415
	13.2	4.83981	13.2	-6.4517			13.2	-0.0344557	13.2	-14.6829
	13.4	3.6191	13.4	-2.78959			13.4	1.18625	13.4	-16.2088
	13.6	2.70357	13.6	1.78805			13.6	1.18625	13.6	-16.5139
	13.8	4.53463	13.8	-0.653359			13.8	-1.25516	13.8	-15.9036
	14	9.11227	14	-1.56889			14	-1.25516	14	-16.5139
	14.2	8.80709	14.2	-4.62064			14.2	-0.644807	14.2	-12.8518
	14.4	6.36568	14.4	-7.06205			14.4	-1.56033	14.4	-14.0725
	14.6	3.6191	14.6	-7.36723			14.6	-1.56033	14.6	-16.2088
	14.8	4.22945	14.8	-6.75687			14.8	0.881072	14.8	-16.2088
	15	2.09322	15	-4.62064			15	-0.0344557	15	-15.5984
	15.2	2.3984	15.2	-5.231			15.2	0.27072	15.2	-7.96903
	15.4	0.262169	15.4	-2.48441			15.4	0.881072	15.4	-13.7674
	15.6	-0.0430071	15.6	-3.39994			15.6	-0.0344557	15.6	-11.9363
	15.8	-0.348183	15.8	-2.17924			15.8	2.71213	15.8	-11.9363
	16	1.1777	16	-5.53617			16	-0.949983	16	-13.157
	16.2	2.3984	16.2	-4.01029			16.2	-0.644807	16.2	-13.157
	16.4	4.83981	16.4	1.1777			16.4	-1.56033	16.4	-14.0725
	16.6	4.83981	16.6	0.567344			16.6	0.881072	16.6	-13.4622
	16.8	5.14498	16.8	-2.17924			16.8	1.18625	16.8	-14.6829
	17	3.92428	17	-3.09476			17	3.62765	17	-14.3777
	17.2	6.97604	17.2	-4.01029			17.2	1.7966	17.2	-11.326
	17.4	5.75533	17.4	-3.70512			17.4	-1.86551	17.4	-14.0725
	17.6	3.00875	17.6	-2.78959			17.6	0.881072	17.6	-11.0208
	17.8	4.83981	17.8	-5.53617			17.8	0.881072	17.8	-15.5984
	18	0.87252	18	-3.39994			18	0.881072	18	-17.4295
	18.2	-0.0430071	18.2	-2.17924			18.2	-0.644807	18.2	-12.5467
	18.4	1.1777	18.4	-0.0430071			18.4	0.27072	18.4	-13.4622
	18.6	3.92428	18.6	-0.653359			18.6	4.238	18.6	-13.157
	18.8	5.75533	18.8	-1.26371			18.8	-0.644807	18.8	-14.9881
	19	1.1777	19	-1.87406			19	-1.86551	19	-18.345
	19.2	1.78805	19.2	-0.958534			19.2	-2.17069	19.2	-10.7156
	19.4	5.75533	19.4	-1.87406			19.4	2.71213	19.4	-12.5467
	19.6	5.45016	19.6	-0.348183			19.6	-0.644807	19.6	-15.2932
	19.8	4.83981	19.8	-2.78959			19.8	1.49142	19.8	-17.7347
	20	3.92428	20	-6.4517			20	1.7966	20	-16.8191
	20.2	3.6191	20.2	-6.75687			20.2	-0.644807	20.2	-17.4295
	20.4	0.567344	20.4	-4.92582			20.4	-0.644807	20.4	-13.4622
	20.6	4.22945	20.6	-3.39994			20.6	-1.25516	20.6	-13.157
	20.8	2.70357	20.8	-4.62064			20.8	-0.0344557	20.8	-15.2932
	21	1.78805	21	-1.87406			21	0.575896	21	-13.157
	21.2	2.70357	21.2	-3.09476			21.2	0.575896	21.2	-12.5467
	21.4	4.83981	21.4	-3.70512			21.4	1.49142	21.4	-17.4295
	21.6	3.6191	21.6	-0.0430071			21.6	0.881072	21.6	-15.9036
	21.8	4.22945	21.8	-2.48441			21.8	-1.56033	21.8	-14.3777
	22	6.36568	22	-0.958534			22	1.7966	22	-14.3777
	22.2	5.75533	22.2	-1.56889			22.2	0.881072	22.2	-13.7674
	22.4	4.53463	22.4	-4.31547			22.4	0.575896	22.4	-14.9881
	22.6	1.48287	22.6	-4.01029			22.6	-0.0344557	22.6	-13.157
	22.8	1.78805	22.8	-6.14652			22.8	-1.56033	22.8	-13.157
	23	0.87252	23	-0.653359			23	0.575896	23	-15.2932
	23.2	4.22945	23.2	-0.958534			23.2	-0.644807	23.2	-14.0725
	23.4	0.87252	23.4	-2.17924			23.4	-0.644807	23.4	-16.8191
	23.6	0.262169	23.6	-4.92582			23.6	0.575896	23.6	-15.5984
	23.8	1.1777	23.8	-3.09476			23.8	0.27072	23.8	-16.5139
	24	1.1777	24	-1.87406			24	-0.644807	24	-11.0208
	24.2	1.48287	24.2	0.262169			24.2	0.881072	24.2	-8.57938
	24.4	-2.17924	24.4	-1.87406			24.4	1.7966	24.4	-11.9363
	24.6	1.78805	24.6	-3.70512			24.6	-2.47586	24.6	-15.5984
	24.8	5.45016	24.8	-3.09476			24.8	0.881072	24.8	-15.9036
	25	7.58639	25	-2.17924			25	0.575896	25	-11.9363
	25.2	2.3984	25.2	0.567344			25.2	-4.00174	25.2	-10.7156
	25.4	2.70357	25.4	1.78805			25.4	-1.25516	25.4	-12.5467
	25.6	1.78805	25.6	-3.39994			25.6	-1.56033	25.6	-16.2088
	25.8	0.567344	25.8	-5.231			25.8	-0.644807	25.8	-15.9036
	26	3.92428	26	-4.62064			26	-0.339632	26	-11.6311
	26.2	6.36568	26.2	-2.78959			26.2	-1.86551	26.2	-13.7674
	26.4	2.3984	26.4	-0.958534			26.4	-3.39139	26.4	-16.8191
	26.6	1.1777	26.6	-1.56889			26.6	-1.56033	26.6	-14.6829
	26.8	3.31393	26.8	-5.231			26.8	-2.17069	26.8	-15.2932
	27	2.3984	27	-5.231			27	-0.339632	27	-15.5984
	27.2	1.48287	27.2	-5.84135			27.2	0.27072	27.2	-15.2932
	27.4	2.09322	27.4	-6.14652			27.4	-2.47586	27.4	-12.2415
	27.6	3.00875	27.6	-4.01029			27.6	-0.339632	27.6	-13.157
	27.8	5.14498	27.8	-3.70512			27.8	-3.08621	27.8	-11.6311
	28	4.83981	28	-6.4517			28	-0.949983	28	-13.7674
	28.2	3.92428	28.2	-1.87406			28.2	-0.949983	28.2	-14.0725
	28.4	2.70357	28.4	-2.78959			28.4	-3.08621	28.4	-10.1053
	28.6	2.3984	28.6	-1.56889			28.6	-2.17069	28.6	-12.8518
	28.8	0.567344	28.8	-2.17924			28.8	3.32248	28.8	-10.7156
	29	3.31393	29	-5.231			29	-2.47586	29	-9.18973
	29.2	2.70357	29.2	-4.92582			29.2	-1.25516	29.2	-12.5467
	29.4	0.87252	29.4	-4.62064			29.4	0.881072	29.4	-11.6311
	29.6	3.31393	29.6	-2.78959			29.6	-0.949983	29.6	-7.66385
	29.8	0.87252	29.8	-2.48441			29.8	-1.86551	29.8	-7.66385
	30	4.22945	30	-0.348183			30	-2.17069	30	-8.88455
	30.2	4.22945	30.2	-0.0430071			30.2	-1.86551	30.2	-7.0535
	30.4	4.22945	30.4	-1.56889			30.4	-0.339632	30.4	-8.57938
	30.6	3.31393	30.6	-1.26371			30.6	-1.25516	30.6	-9.80008
	30.8	3.6191	30.8	-4.01029			30.8	-3.08621	30.8	-13.4622
	31	5.75533	31	-4.62064			31	1.7966	31	-9.4949
	31.2	4.22945	31.2	-4.62064			31.2	1.7966	31.2	-8.2742
	31.4	3.00875	31.4	-4.92582			31.4	0.27072	31.4	-10.4104
	31.6	2.3984	31.6	-6.14652			31.6	2.10177	31.6	-13.7674
	31.8	3.31393	31.8	-1.56889			31.8	-0.644807	31.8	-15.2932
	32	6.06051	32	-1.26371			32	0.27072	32	-12.8518
	32.2	6.67086	32.2	-3.09476			32.2	-0.949983	32.2	-10.4104
	32.4	2.09322	32.4	-6.14652			32.4	-0.0344557	32.4	-12.5467
	32.6	1.48287	32.6	-2.17924			32.6	1.7966	32.6	-13.4622
	32.8	2.09322	32.8	-2.17924			32.8	-0.339632	32.8	-13.7674
	33	4.53463	33	-4.92582			33	-1.25516	33	-11.9363
	33.2	5.75533	33.2	-2.78959			33.2	0.881072	33.2	-13.157
	33.4	3.92428	33.4	-2.78959			33.4	-1.25516	33.4	-14.9881
	33.6	5.14498	33.6	-4.31547			33.6	-0.949983	33.6	-12.2415
	33.8	4.22945	33.8	-1.87406			33.8	4.54318	33.8	-12.5467
	34	6.06051	34	-1.56889			34	-0.339632	34	-11.9363
	34.2	5.14498	34.2	-2.17924			34.2	-0.339632	34.2	-13.7674
	34.4	6.36568	34.4	1.48287			34.4	0.881072	34.4	-17.4295
	34.6	6.67086	34.6	-5.231			34.6	3.32248	34.6	-11.6311
	34.8	5.75533	34.8	-5.231			34.8	2.40695	34.8	-11.326
	35	4.53463	35	-1.26371			35	-2.47586	35	-13.7674
	35.2	1.1777	35.2	-1.87406			35.2	3.93283	35.2	-14.6829
	35.4	1.1777	35.4	-7.97758			35.4	3.0173	35.4	-13.7674
	35.6	1.1777	35.6	-3.70512			35.6	0.881072	35.6	-12.2415
	35.8	4.83981	35.8	-2.78959			35.8	-0.0344557	35.8	-15.9036
	36	2.09322	36	-1.56889			36	3.93283	36	-12.5467
	36.2	2.70357	36.2	-3.70512			36.2	0.575896	36.2	-12.2415
	36.4	2.09322	36.4	-5.84135			36.4	1.18625	36.4	-8.2742
	36.6	2.70357	36.6	-3.09476			36.6	2.40695	36.6	-13.157
	36.8	1.48287	36.8	-6.4517			36.8	1.49142	36.8	-15.9036
	37	2.70357	37	-4.01029			37	1.7966	37	-12.2415
	37.2	3.00875	37.2	-3.09476			37.2	2.71213	37.2	-12.2415
	37.4	5.75533	37.4	2.09322			37.4	3.62765	37.4	-12.2415
	37.6	7.28121	37.6	-0.0430071			37.6	-0.644807	37.6	-11.9363
	37.8	5.75533	37.8	-0.348183			37.8	2.71213	37.8	-11.326
	38	5.14498	38	-2.48441			38	0.881072	38	-11.6311
	38.2	2.70357	38.2	-6.75687			38.2	3.32248	38.2	-14.0725
	38.4	2.70357	38.4	-5.53617			38.4	2.10177	38.4	-12.2415
	38.6	2.3984	38.6	-4.62064			38.6	1.49142	38.6	-7.96903
	38.8	1.78805	38.8	-1.56889			38.8	0.27072	38.8	-9.80008
	39	2.09322	39	-1.87406			39	1.18625	39	-14.0725
	39.2	2.3984	39.2	-5.53617			39.2	2.40695	39.2	-12.2415
	39.4	3.31393	39.4	-5.53617			39.4	0.881072	39.4	-10.4104
	39.6	3.31393	39.6	-5.231			39.6	-0.0344557	39.6	-8.57938
	39.8	5.14498	39.8	-7.06205			39.8	1.7966	39.8	-16.8191
	40	6.67086	40	-3.70512			40	-0.339632	40	-12.5467
	40.2	2.70357	40.2	-0.348183			40.2	2.40695	40.2	-11.6311
	40.4	0.87252	40.4	0.262169			40.4	-1.56033	40.4	-11.0208
	40.6	-0.348183	40.6	-3.39994			40.6	0.27072	40.6	-11.326
	40.8	0.567344	40.8	-5.84135			40.8	-0.339632	40.8	-11.6311
	41	1.78805	41	-4.31547			41	2.71213	41	-8.88455
	41.2	3.31393	41.2	-2.48441			41.2	0.881072	41.2	-13.7674
	41.4	3.00875	41.4	-1.26371			41.4	1.49142	41.4	-13.157
	41.6	1.1777	41.6	-2.17924			41.6	-2.47586	41.6	-10.4104
	41.8	0.87252	41.8	-2.17924			41.8	-2.17069	41.8	-9.18973
	42	0.262169	42	-2.78959			42	-3.69656	42	-10.7156
	42.2	1.1777	42.2	-6.75687			42.2	0.27072	42.2	-14.9881
	42.4	0.567344	42.4	-8.58793			42.4	-0.0344557	42.4	-11.9363
	42.6	3.00875	42.6	-6.14652			42.6	-2.78104	42.6	-8.57938
	42.8	3.31393	42.8	-6.4517			42.8	-0.339632	42.8	-10.7156
	43	3.00875	43	-6.14652			43	1.49142	43	-11.0208
	43.2	0.87252	43.2	-0.958534			43.2	2.10177	43.2	-9.80008
	43.4	2.70357	43.4	-1.56889			43.4	-2.47586	43.4	-9.80008
	43.6	3.31393	43.6	-4.62064			43.6	-5.52762	43.6	-10.7156
	43.8	3.31393	43.8	-5.53617			43.8	-0.949983	43.8	-11.326
	44	5.75533	44	-4.62064			44	-1.25516	44	-14.6829
	44.2	2.70357	44.2	0.262169			44.2	0.27072	44.2	-16.2088
	44.4	1.1777	44.4	-1.87406			44.4	0.575896	44.4	-16.5139
	44.6	0.87252	44.6	-2.78959			44.6	-0.339632	44.6	-14.6829
	44.8	0.567344	44.8	-4.01029			44.8	-1.86551	44.8	-12.2415
	45	4.83981	45	-6.4517			45	1.18625	45	-9.4949
	45.2	3.92428	45.2	-6.75687			45.2	-1.25516	45.2	-9.18973
	45.4	3.00875	45.4	-7.06205			45.4	-4.30692	45.4	-8.2742
	45.6	5.14498	45.6	-8.28275			45.6	-2.17069	45.6	-10.1053
	45.8	3.6191	45.8	-4.62064			45.8	-2.17069	45.8	-8.2742
	46	1.48287	46	-2.17924			46	-3.08621	46	-9.4949
	46.2	2.3984	46.2	-2.48441			46.2	1.7966	46.2	-13.157
	46.4	6.67086	46.4	-2.48441			46.4	-2.47586	46.4	-12.8518
	46.6	7.28121	46.6	-7.36723			46.6	0.27072	46.6	-10.1053
	46.8	6.06051	46.8	-6.14652			46.8	1.04726	46.8	-2.0045
	47	3.6191	47	-3.70512			47	-617.619	47	-627.995
	47.2	3.92428	47.2	-2.78959			47.2	184.103	47.2	170.37
	47.4	5.14498	47.4	-0.653359			47.4	306.84	47.4	295.853
	47.6	2.09322	47.6	-0.348183			47.6	136.402	47.6	126.636
	47.8	2.70357	47.8	-3.39994			47.8	45.9081	47.8	33.7011
	48	3.92428	48	-2.78959			48	24.06	48	10.6323
	48.2	7.89156	48.2	-2.78959			48.2	24.0911	48.2	10.9686
	48.4	7.28121	48.4	-2.78959			48.4	26.6073	48.4	15.0106
	48.6	3.00875	48.6	-3.39994			48.6	29.1359	48.6	15.0978
	48.8	4.83981	48.8	-4.92582			48.8	26.109	48.8	15.1227
	49	3.6191	49	-2.17924			49	26.0094	49	15.0231
	49.2	2.3984	49.2	-1.56889			49.2	25.343	49.2	12.5256
	49.4	4.53463	49.4	-0.348183			49.4	29.1297	49.4	13.2605
	49.6	3.92428	49.6	-3.70512			49.6	20.8588	49.6	13.5346
	49.8	7.89156	49.8	-3.39994			49.8	22.7832	49.8	10.8814
	50	3.92428	50	1.1777			50	24.4586	50	9.81016
	50.2	2.70357	50.2	-0.348183			50.2	23.8109	50.2	10.6883
	50.4	2.09322	50.4	-3.70512			50.4	24.4835	50.4	9.5299
	50.6	4.22945	50.6	-7.06205			50.6	24.1908	50.6	14.7303
	50.8	-0.0430071	50.8	-7.36723			50.8	21.9674	50.8	12.2017
	51	3.31393	51	-7.6724			51	21.2439	51	10.5627
	51.2	6.97604	51.2	-6.14652			51.2	21.9339	51.2	8.20096
	51.4	7.58639	51.4	-5.53617			51.4	19.4524	51.4	9.38155
	51.6	4.53463	51.6	-6.75687			51.6	18.652	51.6	6.44498
	51.8	3.31393	51.8	-5.53617			51.8	17.9817	51.8	8.52127
	52	3.00875	52	-10.1138			52	17.1152	52	5.21331
	52.2	3.00875	52.2	-4.92582			52.2	17.2554	52.2	5.04832
	52.4	3.92428	52.4	-3.70512			52.4	16.8616	52.4	5.2649
	52.6	2.3984	52.6	-1.56889			52.6	18.9732	52.6	6.15582
	52.8	4.22945	52.8	-0.958534			52.8	16.8659	52.8	5.57443
	53	3.6191	53	-0.958534			53	14.8035	53	1.68099
	53.2	3.92428	53.2	-6.14652			53.2	16.4409	53.2	3.31829
	53.4	6.06051	53.4	-3.39994			53.4	15.0579	53.4	5.9026
	53.6	3.6191	53.6	-4.01029			53.6	14.3116	53.6	2.40975
	53.8	3.31393	53.8	-4.62064			53.8	18.1651	53.8	3.51662
	54	-0.653359	54	-5.84135			54	14.4076	54	0.0643495
	54.2	1.48287	54.2	-7.06205			54.2	15.5485	54.2	0.900022
	54.4	0.87252	54.4	-4.31547			54.4	17.6178	54.4	3.27455
	54.6	-0.0430071	54.6	-0.653359			54.6	14.8152	54.6	0.166768
	54.8	3.6191	54.8	1.1777			54.8	13.2424	54.8	0.425024
	55	6.97604	55	0.567344			55	13.5083	55	2.21678
	55.2	4.22945	55.2	0.87252			55.2	16.2219	55.2	4.01492
	55.4	3.6191	55.4	2.09322			55.4	17.4151	55.4	2.46147
	55.6	4.53463	55.6	-1.56889			55.6	13.7299	55.6	2.43837
	55.8	1.48287	55.8	-2.48441			55.8	15.5416	55.8	0.893153
	56	2.3984	56	-2.78959			56	16.4409	56	0.571776
	56.2	-0.653359	56.2	-5.84135			56.2	16.4273	56.2	1.77891
	56.4	1.48287	56.4	-4.62064			56.4	13.6694	56.4	0.546839
	56.6	0.567344	56.6	-0.653359			56.6	14.8806	56.6	3.2839
	56.8	1.48287	56.8	-1.56889			56.8	14.8726	56.8	7.24321
	57	3.92428	57	0.262169			57	14.5607	57	5.40548
	57.2	3.00875	57.2	-0.653359			57.2	14.8603	57.2	4.48435
	57.4	4.83981	57.4	-2.78959			57.4	15.466	57.4	2.95379
	57.6	4.22945	57.6	-5.231			57.6	11.8	57.6	2.33951
	57.8	4.83981	57.8	-0.348183			57.8	13.3225	57.8	5.69315
	58	1.1777	58	-3.09476			58	16.6767	58	4.4697
	58.2	-1.56889	58.2	-3.39994			58.2	16.6744	58.2	2.63633
	58.4	-0.0430071	58.4	-1.56889			58.4	10.2638	58.4	3.54993
	58.6	3.92428	58.6	2.3984			58.6	13.0088	58.6	4.76901
	58.8	3.31393	58.8	0.567344			58.8	12.7022	58.8	4.1573
	59	3.6191	59	-4.92582			59	13.0063	59	3.24064
	59.2	3.92428	59.2	-6.75687			59.2	14.226	59.2	1.71381
	59.4	3.00875	59.4	-4.92582			59.4	13.3097	59.4	3.54407
	59.6	-0.0430071	59.6	-7.36723			59.6	10.8676	59.6	2.62787
	59.8	0.262169	59.8	-9.50346			59.8	17.2758	59.8	2.32214
	60	1.48287	60	-5.53617			60	13.0028	60	6.28895
	60.2	3.6191	60.2	-5.53617			60.2	13.3076	60.2	5.67821
	60.4	7.28121	60.4	-6.14652			60.4	13.3073	60.4	5.98306
	60.6	0.87252	60.6	-1.56889			60.6	14.8329	60.6	7.50866
	60.8	1.48287	60.8	-1.87406			60.8	13.9171	60.8	3.84632
	61	4.22945	61	-3.09476			61	14.5273	61	0.184018
	61.2	7.58639	61.2	-7.97758			61.2	13.0012	61.2	5.67702
	61.4	3.92428	61.4	-5.84135			61.4	11.17	61.4	7.20276
	61.6	3.6191	61.6	-4.92582			61.6	15.4424	61.6	5.67677
	61.8	2.3984	61.8	-4.62064			61.8	14.5268	61.8	6.28703
	62	2.09322	62	-1.56889			62	10.8646	62	1.70931
	62.2	3.92428	62.2	-7.06205			62.2	16.3577	62.2	6.59206
	62.4	3.31393	62.4	-6.14652			62.4	17.8835	62.4	5.67647
	62.6	3.00875	62.6	-7.06205			62.6	14.8317	62.6	8.42301
	62.8	2.3984	62.8	-5.231			62.8	9.94885	62.8	5.67639
	63	4.22945	63	-5.84135			63	12.085	63	3.54012
	63.2	1.78805	63.2	-4.01029			63.2	13.9161	63.2	4.15045
	63.4	6.06051	63.4	-1.26371			63.4	13.916	63.4	3.84525
	63.6	5.14498	63.6	-1.56889			63.6	13.6109	63.6	5.37111
	63.8	5.14498	63.8	0.87252			63.8	14.8315	63.8	2.62451
	64	4.22945	64	-1.87406			64	15.4419	64	4.45555
	64.2	3.31393	64.2	0.567344			64.2	14.2212	64.2	9.33835
	64.4	4.83981	64.4	-1.56889			64.4	16.0522	64.4	3.54
	64.6	5.45016	64.6	-0.958534			64.6	13.6108	64.6	2.62447
	64.8	3.92428	64.8	-0.653359			64.8	13.3056	64.8	4.45551
	65	2.70357	65	-3.70512			65	16.0522	65	6.59174
	65.2	5.14498	65.2	-1.87406			65.2	17.8832	65.2	5.37103
	65.4	4.53463	65.4	-0.653359			65.4	15.747	65.4	5.06585
	65.6	0.87252	65.6	-2.17924			65.6	16.0522	65.6	6.28655
	65.8	2.3984	65.8	-5.231			65.8	13.0004	65.8	7.81243
	66	3.31393	66	-4.62064			66	13.6108	66	3.84514
	66.2	4.53463	66.2	-3.70512			66.2	17.2729	66.2	5.06584
	66.4	5.14498	66.4	-0.958534			66.4	14.2211	66.4	3.23479
	66.6	4.53463	66.6	-0.0430071			66.6	14.8315	66.6	4.76066
	66.8	6.36568	66.8	-2.17924			66.8	16.9677	66.8	3.53996
	67	5.75533	67	-3.09476			67	16.6625	67	2.62443
	67.2	3.00875	67.2	-3.39994			67.2	12.3901	67.2	3.84513
	67.4	3.00875	67.4	-4.62064			67.4	17.2729	67.4	4.45548
	67.6	5.75533	67.6	-3.39994			67.6	16.9677	67.6	2.62443
	67.8	5.45016	67.8	-0.348183			67.8	14.8315	67.8	-1.34286
	68	4.22945	68	-2.17924			68	16.9677	68	2.01408
	68.2	4.83981	68.2	-1.87406			68.2	17.8832	68.2	2.9296
	68.4	3.00875	68.4	-0.653359			68.4	16.0522	68.4	0.183021
	68.6	1.1777	68.6	-0.0430071			68.6	15.747	68.6	3.23478
	68.8	1.48287	68.8	-4.31547			68.8	13.9159	68.8	5.06583
	69	1.78805	69	-3.70512			69	14.8315	69	3.53995
	69.2	4.22945	69.2	-3.09476			69.2	18.1884	69.2	1.40372
	69.4	1.48287	69.4	-3.70512			69.4	16.0522	69.4	3.53995
	69.6	6.06051	69.6	-2.48441			69.6	14.5263	69.6	2.62443
	69.8	8.19674	69.8	-1.87406			69.8	15.747	69.8	3.84513
	70	7.28121	70	-1.87406			70	19.1039	70	0.488195
	70.2	3.31393	70.2	-4.31547			70.2	16.0522	70.2	1.7089
	70.4	0.87252	70.4	-1.56889			70.4	15.747	70.4	3.23478
	70.6	0.567344	70.6	-1.87406			70.6	13.6108	70.6	4.76066
	70.8	3.6191	70.8	-2.48441			70.8	11.1693	70.8	2.9296
	71	3.00875	71	-4.92582			71	16.6625	71	4.1503
	71.2	-1.26371	71.2	-4.31547			71.2	17.8832	71.2	4.45548
	71.4	3.00875	71.4	-5.231			71.4	18.7987	71.4	6.59171
	71.6	3.00875	71.6	-4.62064			71.6	17.2729	71.6	7.20206
	71.8	2.70357	71.8	-4.01029			71.8	16.0522	71.8	2.31925
	72	-1.87406	72	-2.78959			72	14.2211	72	1.40372
	72.2	-1.26371	72.2	-1.26371			72.2	17.578	72.2	4.45548
	72.4	-0.348183	72.4	-6.75687			72.4	16.3573	72.4	7.50724
	72.6	2.70357	72.6	-5.84135			72.6	16.3573	72.6	7.81241
	72.8	3.92428	72.8	-7.06205			72.8	15.4418	72.8	5.37101
	73	2.09322	73	-6.14652			73	16.9677	73	4.45548
	73.2	2.3984	73.2	-6.75687			73.2	18.1884	73.2	5.37101
	73.4	1.78805	73.4	-7.36723			73.4	15.1366	73.4	4.1503
	73.6	1.1777	73.6	-5.53617			73.6	15.747	73.6	5.67618
	73.8	0.87252	73.8	-1.56889			73.8	17.2729	73.8	4.1503
	74	2.09322	74	-2.17924			74	16.6625	74	7.20206
	74.2	3.31393	74.2	-2.48441			74.2	17.2729	74.2	6.59171
	74.4	6.67086	74.4	-4.62064			74.4	14.8315	74.4	5.98136
	74.6	3.92428	74.6	-8.28275			74.6	14.8315	74.6	7.81241
	74.8	2.3984	74.8	-7.36723			74.8	14.5263	74.8	5.06583
	75	2.09322	75	-7.06205			75	16.0522	75	6.28653
	75.2	1.78805	75.2	-3.09476			75.2	20.3246	75.2	1.40372
	75.4	3.92428	75.4	-3.09476			75.4	17.2729	75.4	6.28653
	75.6	3.00875	75.6	-4.62064			75.6	14.8315	75.6	7.50724
	75.8	4.83981	75.8	-2.17924			75.8	13.0004	75.8	4.45548
	76	1.78805	76	-0.653359			76	14.5263	76	9.33829
	76.2	-0.653359	76.2	-4.62064			76.2	16.3573	76.2	7.20206
	76.4	2.3984	76.4	-7.6724			76.4	16.3573	76.4	9.33829
	76.6	3.6191	76.6	-3.39994			76.6	15.4418	76.6	5.06583
	76.8	3.31393	76.8	-4.31547			76.8	15.747	76.8	7.50724
	77	0.262169	77	-4.01029			77	17.8832	77	6.59171
	77.2	2.09322	77.2	-3.70512			77.2	14.2211	77.2	9.64347
	77.4	4.22945	77.4	-0.348183			77.4	14.2211	77.4	8.42276
	77.6	1.78805	77.6	-4.31547			77.6	14.8315	77.6	4.45548
	77.8	0.567344	77.8	-5.84135			77.8	15.4418	77.8	6.59171
	78	-0.348183	78	-6.75687			78	17.8832	78	6.59171
	78.2	-1.56889	78.2	-8.58793			78.2	12.39	78.2	7.81241
	78.4	1.78805	78.4	-6.14652			78.4	14.8315	78.4	6.89689
	78.6	3.00875	78.6	-4.92582			78.6	14.8315	78.6	5.98136
	78.8	3.31393	78.8	-3.70512			78.8	15.747	78.8	8.72794
	79	3.00875	79	-1.26371			79	13.0004	79	7.50724
	79.2	4.22945	79.2	-7.6724			79.2	13.6108	79.2	7.20206
	79.4	2.70357	79.4	-8.28275			79.4	15.4418	79.4	7.20206
	79.6	2.3984	79.6	-5.84135			79.6	17.578	79.6	6.89689
	79.8	2.70357	79.8	-4.92582			79.8	13.9159	79.8	5.37101
	80	6.06051	80	-2.78959			80	14.2211	80	7.20206
	80.2	3.31393	80.2	-0.653359			80.2	16.3573	80.2	7.20206
	80.4	0.87252	80.4	-1.26371			80.4	14.5263	80.4	8.11759
	80.6	3.31393	80.6	-1.26371			80.6	15.1366	80.6	4.45548
	80.8	6.67086	80.8	-0.0430071			80.8	13.3056	80.8	7.50724
	81	4.53463	81	-1.87406			81	10.2538	81	7.50724
	81.2	0.567344	81.2	-2.78959			81.2	13.0004	81.2	5.98136
	81.4	-0.0430071	81.4	-0.348183			81.4	16.3573	81.4	8.42276
	81.6	2.09322	81.6	-1.87406			81.6	16.6625	81.6	5.67618
	81.8	3.92428	81.8	-1.56889			81.8	13.9159	81.8	3.53995
	82	5.14498	82	-4.01029			82	16.3573	82	5.67618
	82.2	10.6381	82.2	-2.48441			82.2	15.1366	82.2	7.20206
	82.4	5.75533	82.4	-5.53617			82.4	13.6108	82.4	8.11759
	82.6	1.48287	82.6	-4.92582			82.6	18.1884	82.6	7.81241
	82.8	2.3984	82.8	-4.31547			82.8	13.9159	82.8	2.9296
	83	1.78805	83	-4.01029			83	15.747	83	4.45548
	83.2	2.09322	83.2	-2.78959			83.2	12.6952	83.2	4.1503
	83.4	3.00875	83.4	-3.09476			83.4	17.8832	83.4	7.81241
	83.6	4.22945	83.6	-5.231			83.6	15.4418	83.6	6.59171
	83.8	4.53463	83.8	-3.39994			83.8	16.3573	83.8	6.59171
	84	5.45016	84	-0.348183			84	14.8315	84	4.1503
	84.2	7.28121	84.2	-0.958534			84.2	14.8315	84.2	4.1503
	84.4	3.00875	84.4	-2.48441			84.4	13.0004	84.4	3.53995
	84.6	-0.348183	84.6	-2.17924			84.6	14.8315	84.6	7.50724
	84.8	0.262169	84.8	-4.62064			84.8	19.1039	84.8	6.28653
	85	1.78805	85	-7.06205			85	17.2729	85	5.67618
	85.2	2.3984	85.2	-4.92582			85.2	19.4091	85.2	6.59171
	85.4	2.70357	85.4	-2.78959			85.4	13.6108	85.4	5.06583
	85.6	1.48287	85.6	-4.01029			85.6	15.4418	85.6	6.59171
	85.8	1.78805	85.8	-2.48441			85.8	16.6625	85.8	5.37101
	86	3.6191	86	-2.48441			86	14.8315	86	4.76066
	86.2	3.6191	86.2	-3.09476			86.2	16.0522	86.2	5.98136
	86.4	2.3984	86.4	-0.348183			86.4	17.2729	86.4	5.37101
	86.6	3.6191	86.6	-1.56889			86.6	14.5263	86.6	8.72794
	86.8	4.53463	86.8	-4.62064			86.8	13.6108	86.8	2.9296
	87	5.14498	87	-1.56889			87	17.578	87	6.89689
	87.2	3.00875	87.2	-1.87406			87.2	15.1366	87.2	5.06583
	87.4	3.6191	87.4	-4.01029			87.4	15.747	87.4	5.98136
	87.6	4.83981	87.6	-2.17924			87.6	13.3056	87.6	4.1503
	87.8	5.45016	87.8	-4.31547			87.8	16.9677	87.8	5.37101
	88	5.45016	88	-6.4517			88	15.4418	88	7.50724
	88.2	2.3984	88.2	-3.09476			88.2	15.747	88.2	5.37101
	88.4	1.78805	88.4	-4.31547			88.4	14.8315	88.4	3.23478
	88.6	2.09322	88.6	-5.84135			88.6	16.0522	88.6	5.98136
	88.8	5.14498	88.8	-1.56889			88.8	14.2211	88.8	4.45548
	89	4.22945	89	-2.48441			89	15.747	89	5.37101
	89.2	-2.48441	89.2	-1.87406			89.2	17.578	89.2	4.76066
	89.4	-1.56889	89.4	-2.48441			89.4	18.1884	89.4	5.98136
	89.6	4.53463	89.6	-6.4517			89.6	17.8832	89.6	8.42276
	89.8	2.70357	89.8	-5.53617			89.8	15.747	89.8	7.50724
	90	0.87252	90	-3.39994			90	16.0522	90	4.45548
	90.2	1.1777	90.2	-3.09476			90.2	14.5263	90.2	5.37101
	90.4	1.78805	90.4	2.09322			90.4	16.0522	90.4	3.53995
	90.6	0.87252	90.6	-0.653359			90.6	14.5263	90.6	9.03312
	90.8	2.70357	90.8	-3.39994			90.8	16.3573	90.8	6.59171
	91	5.45016	91	0.87252			91	19.4091	91	3.23478
	91.2	4.53463	91.2	-2.17924			91.2	17.578	91.2	6.28653
	91.4	0.567344	91.4	-1.56889			91.4	16.3573	91.4	7.50724
	91.6	-0.653359	91.6	-1.26371			91.6	16.0522	91.6	5.06583
	91.8	1.1777	91.8	-2.48441			91.8	13.9159	91.8	6.59171
	92	5.45016	92	-3.09476			92	13.3056	92	5.37101
	92.2	5.45016	92.2	-6.75687			92.2	13.9159	92.2	8.11759
	92.4	5.14498	92.4	-3.39994			92.4	17.8832	92.4	4.1503
	92.6	5.75533	92.6	-2.48441			92.6	16.0522	92.6	4.76066
	92.8	4.53463	92.8	-4.31547			92.8	15.747	92.8	2.9296
	93	7.28121	93	-0.653359			93	12.6952	93	8.42276
	93.2	3.6191	93.2	-0.958534			93.2	16.0522	93.2	2.62443
	93.4	-0.0430071	93.4	-2.78959			93.4	17.2729	93.4	3.53995
	93.6	-0.0430071	93.6	-3.39994			93.6	17.2729	93.6	6.28653
	93.8	1.78805	93.8	-3.39994			93.8	16.3573	93.8	7.20206
	94	1.1777	94	0.262169			94	15.1366	94	4.76066
	94.2	-0.0430071	94.2	1.1777			94.2	16.6625	94.2	5.67618
	94.4	-0.0430071	94.4	3.31393			94.4	14.8315	94.4	2.62443
	94.6	3.6191	94.6	2.3984			94.6	14.2211	94.6	6.59171
	94.8	6.06051	94.8	-2.78959			94.8	16.0522	94.8	6.89689
	95	5.14498	95	-4.62064			95	17.578	95	3.84513
	95.2	3.31393	95.2	-3.39994			95.2	15.1366	95.2	4.45548
	95.4	2.70357	95.4	-0.653359			95.4	15.747	95.4	2.62443
	95.6	3.6191	95.6	-4.62064			95.6	16.6625	95.6	5.37101
	95.8	5.14498	95.8	-7.97758			95.8	16.6625	95.8	9.03312
	96	3.00875	96	-5.53617			96	12.6952	96	4.76066
	96.2	5.75533	96.2	-3.39994			96.2	12.39	96.2	7.20206
	96.4	1.78805	96.4	-1.87406			96.4	13.3056	96.4	6.89689
	96.6	3.92428	96.6	-0.958534			96.6	11.4745	96.6	4.76066
	96.8	3.6191	96.8	-1.56889			96.8	14.2211	96.8	4.45548
	97	2.09322	97	-2.17924			97	17.2729	97	5.67618
	97.2	2.3984	97.2	-3.09476			97.2	14.8315	97.2	6.59171
	97.4	4.83981	97.4	-0.0430071			97.4	14.5263	97.4	4.76066
	97.6	4.22945	97.6	0.567344			97.6	16.3573	97.6	6.28653
	97.8	3.92428	97.8	-0.958534			97.8	15.1366	97.8	5.67618
	98	2.70357	98	-3.09476			98	14.8315	98	5.67618
	98.2	3.00875	98.2	-0.0430071			98.2	13.6108	98.2	6.59171
	98.4	-0.348183	98.4	-0.653359			98.4	14.5263	98.4	8.72794
	98.6	3.31393	98.6	-1.87406			98.6	15.1366	98.6	8.42276
	98.8	3.6191	98.8	-3.09476			98.8	18.4936	98.8	6.89689
	99	5.14498	99	0.87252			99	16.3573	99	5.67618
	99.2	6.06051	99.2	0.567344			99.2	16.9677	99.2	5.37101
	99.4	3.6191	99.4	0.567344			99.4	15.4418	99.4	5.06583
	99.6	2.70357	99.6	-4.62064			99.6	13.3056	99.6	6.28653
	99.8	2.70357	99.8	-7.6724			99.8	14.5263	99.8	2.62443
	100	0.87252	100	-5.53617			100	14.5263	100	4.1503
	100.2	1.48287	100.2	-4.92582			100.2	12.6952	100.2	5.37101
	100.4	6.67086	100.4	-0.0430071			100.4	16.9677	100.4	8.72794
	100.6	5.45016	100.6	-0.0430071			100.6	17.2729	100.6	6.89689
	100.8	3.6191	100.8	-1.87406			100.8	15.747	100.8	3.23478
	101	6.67086	101	-3.09476			101	15.1366	101	2.31925
	101.2	5.45016	101.2	-0.958534			101.2	14.5263	101.2	3.84513
	101.4	1.48287	101.4	-2.78959			101.4	13.6108	101.4	4.45548
	101.6	0.87252	101.6	-4.62064			101.6	15.747	101.6	3.84513
	101.8	4.53463	101.8	-2.17924			101.8	16.9677	101.8	5.98136
	102	2.70357	102	-0.653359			102	14.5263	102	2.01407
	102.2	3.31393	102.2	-1.87406			102.2	13.3056	102.2	3.84513
	102.4	5.45016	102.4	-3.70512			102.4	16.9677	102.4	2.31925
	102.6	4.22945	102.6	-3.70512			102.6	14.8315	102.6	4.76066
	102.8	3.31393	102.8	-5.53617			102.8	15.1366	102.8	5.06583
	103	3.92428	103	-3.09476			103	13.3056	103	5.37101
	103.2	3.6191	103.2	-4.01029			103.2	17.8832	103.2	4.45548
	103.4	1.78805	103.4	-4.62064			103.4	19.1039	103.4	1.7089
	103.6	0.567344	103.6	-3.09476			103.6	16.3573	103.6	3.84513
	103.8	2.09322	103.8	-2.78959			103.8	15.747	103.8	5.06583
	104	4.22945	104	-3.09476			104	15.1366	104	5.98136
	104.2	5.45016	104.2	-4.31547			104.2	16.3573	104.2	5.06583
	104.4	5.45016	104.4	-3.39994			104.4	13.9159	104.4	4.45548
	104.6	5.75533	104.6	-4.01029			104.6	13.3056	104.6	3.23478
	104.8	3.6191	104.8	-4.31547			104.8	16.6625	104.8	3.53995
	105	2.3984	105	-2.78959			105	16.3573	105	4.45548
	105.2	3.6191	105.2	-3.39994			105.2	20.6298	105.2	7.81241
	105.4	5.75533	105.4	-5.84135			105.4	16.6625	105.4	3.84513
	105.6	3.6191	105.6	-4.62064			105.6	17.8832	105.6	5.67618
	105.8	3.92428	105.8	-7.36723			105.8	16.0522	105.8	8.72794
	106	5.14498	106	-6.14652			106	13.9159	106	5.67618
	106.2	2.70357	106.2	-0.653359			106.2	15.1366	106.2	3.23478
	106.4	-1.56889	106.4	-2.78959			106.4	14.5263	106.4	4.1503
	106.6	-0.958534	106.6	-4.62064			106.6	16.9677	106.6	6.28653
	106.8	4.22945	106.8	-3.39994			106.8	14.8315	106.8	5.06583
	107	3.31393	107	-1.56889			107	16.6625	107	2.62443
	107.2	0.567344	107.2	-3.39994			107.2	16.9677	107.2	5.37101
	107.4	-1.87406	107.4	-3.70512			107.4	13.9159	107.4	6.28653
	107.6	0.87252	107.6	-2.48441			107.6	14.2211	107.6	4.76066
	107.8	2.70357	107.8	-4.31547			107.8	16.3573	107.8	2.01407
	108	3.92428	108	-4.62064			108	17.2729	108	5.06583
	108.2	-0.348183	108.2	-3.39994			108.2	15.1366	108.2	5.37101
	108.4	0.567344	108.4	-2.48441			108.4	13.9159	108.4	8.72794
	108.6	3.6191	108.6	-0.958534			108.6	16.6625	108.6	6.28653
	108.8	4.22945	108.8	-4.31547			108.8	15.747	108.8	6.89689
	109	3.92428	109	-7.36723			109	15.4418	109	5.06583
	109.2	3.6191	109.2	-6.4517			109.2	12.39	109.2	4.76066
	109.4	3.6191	109.4	-7.06205			109.4	16.6625	109.4	6.28653
	109.6	3.00875	109.6	-2.48441			109.6	13.9159	109.6	9.33829
	109.8	3.92428	109.8	-4.01029			109.8	12.6952	109.8	7.81241
	110	2.70357	110	-6.75687			110	12.39	110	7.50724
	110.2	4.53463	110.2	-7.97758			110.2	16.0522	110.2	6.59171
	110.4	3.00875	110.4	-6.4517			110.4	14.8315	110.4	6.59171
	110.6	4.83981	110.6	-5.84135			110.6	15.4418	110.6	7.50724
	110.8	2.09322	110.8	-5.231			110.8	15.1366	110.8	9.03312
	111	3.00875	111	-5.84135			111	14.8315	111	6.28653
	111.2	4.83981	111.2	-3.70512			111.2	13.6108	111.2	8.42276
	111.4	5.14498	111.4	-2.17924			111.4	13.3056	111.4	5.98136
	111.6	5.45016	111.6	-0.348183			111.6	14.5263	111.6	4.45548
	111.8	4.22945	111.8	-4.01029			111.8	14.8315	111.8	9.03312
	112	5.75533	112	-4.92582			112	11.7797	112	7.20206
	112.2	2.70357	112.2	-3.70512			112.2	13.6108	112.2	7.50724
	112.4	0.262169	112.4	-2.48441			112.4	14.2211	112.4	9.03312
	112.6	2.09322	112.6	-3.09476			112.6	14.2211	112.6	8.72794
	112.8	1.1777	112.8	0.567344			112.8	13.6108	112.8	9.03312
	113	2.70357	113	-0.348183			113	16.6625	113	8.42276
	113.2	-0.0430071	113.2	-0.653359			113.2	17.2729	113.2	7.50724
	113.4	1.1777	113.4	-3.70512			113.4	12.39	113.4	8.11759
	113.6	1.48287	113.6	-1.26371			113.6	12.0849	113.6	6.28653
	113.8	3.92428	113.8	-1.87406			113.8	14.8315	113.8	4.1503
	114	6.36568	114	1.1777			114	15.1366	114	4.76066
	114.2	7.58639	114.2	0.567344			114.2	13.3056	114.2	5.37101
	114.4	6.97604	114.4	-3.39994			114.4	17.2729	114.4	2.9296
	114.6	6.67086	114.6	-0.653359			114.6	15.4418	114.6	2.31925
	114.8	4.22945	114.8	3.31393			114.8	15.4418	114.8	4.45548
	115	2.70357	115	3.92428			115	14.2211	115	5.37101
	115.2	1.48287	115.2	-2.17924			115.2	16.9677	115.2	4.76066
	115.4	1.1777	115.4	-2.48441			115.4	15.1366	115.4	3.53995
	115.6	5.75533	115.6	-3.39994			115.6	13.3056	115.6	5.06583
	115.8	5.14498	115.8	-0.0430071			115.8	14.2211	115.8	4.45548
	116	3.31393	116	1.1777			116	15.1366	116	3.53995
	116.2	5.75533	116.2	0.87252			116.2	16.9677	116.2	2.9296
	116.4	3.31393	116.4	-2.17924			116.4	16.9677	116.4	1.40372
	116.6	3.6191	116.6	-1.56889			116.6	15.4418	116.6	6.59171
	116.8	2.70357	116.8	-1.87406			116.8	11.7797	116.8	4.45548
	117	1.78805	117	-1.26371			117	13.0004	117	1.40372
	117.2	-0.958534	117.2	-2.17924			117.2	15.747	117.2	0.793371
	117.4	2.09322	117.4	-3.09476			117.4	13.9159	117.4	2.62443
	117.6	0.87252	117.6	-6.14652			117.6	16.0522	117.6	3.84513
	117.8	3.6191	117.8	-6.4517			117.8	16.3573	117.8	5.98136
	118	3.6191	118	-4.01029			118	18.1884	118	2.9296
	118.2	1.1777	118.2	-2.17924			118.2	14.2211	118.2	1.09855
	118.4	1.78805	118.4	-3.70512			118.4	14.8315	118.4	2.9296
	118.6	3.92428	118.6	-5.53617			118.6	13.3056	118.6	5.37101
	118.8	0.262169	118.8	-5.53617			118.8	16.3573	118.8	3.53995
	119	-0.958534	119	-3.39994			119	17.578	119	5.37101
	119.2	2.3984	119.2	0.87252			119.2	17.2729	119.2	3.84513
	119.4	1.48287	119.4	2.09322			119.4	14.8315	119.4	6.89689
	119.6	-0.0430071	119.6	0.567344			119.6	18.1884	119.6	4.76066
	119.8	2.09322	119.8	-0.958534			119.8	18.1884	119.8	5.06583
	120	6.36568	120	-8.8931			120	12.6952	120	3.53995
	120.2	4.22945	120.2	-8.8931			120.2	13.9159	120.2	6.59171
	120.4	2.3984	120.4	-4.92582			120.4	15.1366	120.4	3.23478
	120.6	2.3984	120.6	-2.17924			120.6	14.5263	120.6	3.84513
	120.8	4.22945	120.8	-5.231			120.8	16.9677	120.8	3.84513
	121	1.1777	121	-3.39994			121	16.0522	121	5.37101
	121.2	4.22945	121.2	-5.84135			121.2	13.6108	121.2	3.84513
	121.4	5.14498	121.4	-4.62064			121.4	14.8315	121.4	3.84513
	121.6	4.53463	121.6	-5.231			121.6	16.9677	121.6	0.793371
	121.8	3.00875	121.8	-5.231			121.8	12.6952	121.8	4.1503
	122	3.6191	122	-6.75687			122	17.8832	122	2.9296
	122.2	1.1777	122.2	-2.17924			122.2	13.6108	122.2	-0.122157
	122.4	2.70357	122.4	-5.53617			122.4	15.4418	122.4	3.84513
	122.6	4.53463	122.6	-7.6724			122.6	16.0522	122.6	6.89689
	122.8	5.14498	122.8	-3.70512			122.8	14.2211	122.8	5.67618
	123	5.14498	123	-2.48441			123	14.5263	123	5.37101
	123.2	2.70357	123.2	-4.62064			123.2	11.1693	123.2	2.62443
	123.4	1.78805	123.4	-6.14652			123.4	11.4745	123.4	4.45548
	123.6	2.09322	123.6	-7.6724			123.6	14.2211	123.6	1.7089
	123.8	2.70357	123.8	-2.17924			123.8	18.7987	123.8	3.23478
	124	3.31393	124	-0.653359			124	15.4418	124	4.45548
	124.2	1.78805	124.2	-2.48441			124.2	13.0004	124.2	7.81241
	124.4	0.87252	124.4	-4.62064			124.4	12.0849	124.4	3.23478
	124.6	3.31393	124.6	-4.31547			124.6	13.6108	124.6	2.62443
	124.8	2.70357	124.8	-4.62064			124.8	14.8315	124.8	5.67618
	125	3.92428	125	-4.62064			125	14.5263	125	4.1503
	125.2	5.45016	125.2	-5.53617			125.2	15.1366	125.2	8.11759
	125.4	3.31393	125.4	-3.39994			125.4	11.7797	125.4	4.1503
	125.6	3.31393	125.6	-5.231			125.6	14.2211	125.6	5.37101
	125.8	3.6191	125.8	-4.62064			125.8	15.1366	125.8	5.98136
	126	1.78805	126	-4.62064			126	12.39	126	5.98136
	126.2	3.31393	126.2	-4.01029			126.2	14.5263	126.2	7.20206
	126.4	4.83981	126.4	-5.231			126.4	16.0522	126.4	4.45548
	126.6	2.09322	126.6	-3.39994			126.6	12.6952	126.6	6.59171
	126.8	3.6191	126.8	-2.17924			126.8	10.559	126.8	6.59171
	127	3.6191	127	-1.56889			127	13.3056	127	6.89689
	127.2	1.48287	127.2	-3.70512			127.2	15.4418	127.2	5.37101
	127.4	3.92428	127.4	-4.62064			127.4	14.2211	127.4	4.76066
	127.6	5.45016	127.6	-5.231			127.6	11.4745	127.6	6.89689
	127.8	6.36568	127.8	-5.53617			127.8	12.39	127.8	8.11759
	128	6.36568	128	-6.4517			128	14.5263	128	9.33829
	128.2	4.53463	128.2	-3.39994			128.2	16.3573	128.2	8.72794
	128.4	0.87252	128.4	-3.09476			128.4	11.4745	128.4	8.11759
	128.6	2.3984	128.6	-3.09476			128.6	12.6952	128.6	5.37101
	128.8	6.06051	128.8	-5.84135			128.8	13.0004	128.8	3.53995
	129	4.83981	129	-6.14652			129	11.4745	129	6.89689
	129.2	3.6191	129.2	-4.31547			129.2	12.6952	129.2	7.81241
	129.4	4.22945	129.4	-2.78959			129.4	13.6108	129.4	9.64347
	129.6	4.22945	129.6	-7.06205			129.6	13.9159	129.6	7.20206
	129.8	6.06051	129.8	-4.92582			129.8	16.0522	129.8	4.76066
	130	4.22945	130	-2.78959			130	13.6108	130	9.94864
	130.2	-0.653359	130.2	-0.0430071			130.2	12.0849	130.2	5.67618
	130.4	1.78805	130.4	2.3984			130.4	15.747	130.4	10.2538
	130.6	0.567344	130.6	-1.26371			130.6	14.2211	130.6	7.81241
	130.8	3.00875	130.8	-2.78959			130.8	16.3573	130.8	4.76066
	131	3.6191	131	-3.39994			131	13.0004	131	4.45548
	131.2	4.22945	131.2	-3.39994			131.2	11.1693	131.2	5.98136
	131.4	2.3984	131.4	-5.231			131.4	13.6108	131.4	6.89689
	131.6	-0.0430071	131.6	-5.53617			131.6	17.578	131.6	5.06583
	131.8	4.83981	131.8	0.87252			131.8	13.3056	131.8	5.67618
	132	4.22945	132	2.09322			132	14.8315	132	7.20206
	132.2	3.31393	132.2	2.09322			132.2	14.5263	132.2	9.03312
	132.4	1.78805	132.4	-2.17924			132.4	13.3056	132.4	4.1503
	132.6	1.1777	132.6	-4.62064			132.6	13.6108	132.6	4.45548
	132.8	1.48287	132.8	-5.53617			132.8	13.9159	132.8	2.31925
	133	6.36568	133	-1.87406			133	15.4418	133	2.31925
	133.2	6.67086	133.2	-4.31547			133.2	13.3056	133.2	9.33829
	133.4	4.22945	133.4	-4.31547			133.4	14.8315	133.4	6.28653
	133.6	3.31393	133.6	-4.62064			133.6	17.8832	133.6	5.98136
	133.8	3.6191	133.8	-4.62064			133.8	13.6108	133.8	4.76066
	134	3.92428	134	-2.48441			134	13.6108	134	5.37101
	134.2	6.36568	134.2	-2.17924			134.2	17.2729	134.2	7.20206
	134.4	5.14498	134.4	-0.0430071			134.4	14.5263	134.4	1.09855
	134.6	4.53463	134.6	1.78805			134.6	13.3056	134.6	6.59171
	134.8	6.36568	134.8	-0.958534			134.8	13.3056	134.8	11.7797
	135	4.22945	135	-0.653359			135	17.578	135	5.98136
	135.2	4.22945	135.2	-1.56889			135.2	14.5263	135.2	4.45548
	135.4	3.92428	135.4	-5.84135			135.4	13.6108	135.4	2.9296
	135.6	5.14498	135.6	-4.01029			135.6	15.1366	135.6	5.37101
	135.8	4.22945	135.8	-3.09476			135.8	16.0522	135.8	5.67618
	136	3.00875	136	0.262169			136	15.1366	136	7.20206
	136.2	1.78805	136.2	-4.01029			136.2	16.0522	136.2	3.23478
	136.4	2.3984	136.4	-1.56889			136.4	16.9677	136.4	4.45548
	136.6	3.31393	136.6	-1.87406			136.6	13.3056	136.6	4.45548
	136.8	-0.348183	136.8	-6.4517			136.8	13.6108	136.8	7.20206
	137	2.3984	137	-4.31547			137	13.9159	137	5.98136
	137.2	3.00875	137.2	-0.0430071			137.2	13.6108	137.2	2.31925
	137.4	4.22945	137.4	-0.348183			137.4	17.2729	137.4	4.45548
	137.6	4.53463	137.6	-3.39994			137.6	17.2729	137.6	3.23478
	137.8	2.3984	137.8	-4.31547			137.8	15.1366	137.8	1.09855
	138	3.6191	138	-4.01029			138	16.3573	138	2.01407
	138.2	0.87252	138.2	-1.87406			138.2	16.6625	138.2	5.06583
	138.4	2.3984	138.4	-6.75687			138.4	17.8832	138.4	7.81241
	138.6	0.567344	138.6	-4.31547			138.6	15.1366	138.6	3.53995
	138.8	2.3984	138.8	-4.31547			138.8	14.5263	138.8	2.31925
	139	6.06051	139	-5.231			139	15.4418	139	4.1503
	139.2	8.80709	139.2	-2.17924			139.2	14.8315	139.2	5.37101
	139.4	6.36568	139.4	-3.09476			139.4	14.2211	139.4	8.11759
	139.6	2.70357	139.6	-0.653359			139.6	13.3056	139.6	4.1503
	139.8	5.14498	139.8	-3.70512			139.8	12.6952	139.8	3.53995
	140	5.75533	140	-2.48441			140	13.9159	140	4.1503
	140.2	3.92428	140.2	-4.01029			140.2	14.5263	140.2	3.53995
	140.4	3.00875	140.4	-7.6724			140.4	13.9159	140.4	4.76066
	140.6	3.31393	140.6	-5.53617			140.6	17.578	140.6	3.84513
	140.8	1.48287	140.8	-7.6724			140.8	17.578	140.8	2.62443
	141	3.00875	141	-7.06205			141	14.5263	141	6.59171
	141.2	3.6191	141.2	-8.58793			141.2	12.0849	141.2	5.06583
	141.4	2.09322	141.4	-4.92582			141.4	14.5263	141.4	4.76066
	141.6	1.1777	141.6	-4.92582			141.6	15.4418	141.6	6.59171
	141.8	2.70357	141.8	-3.09476			141.8	18.4936	141.8	4.76066
	142	3.31393	142	-4.31547			142	15.747	142	6.59171
	142.2	2.09322	142.2	-4.01029			142.2	12.6952	142.2	6.28653
	142.4	2.3984	142.4	-5.53617			142.4	16.6625	142.4	7.81241
	142.6	3.6191	142.6	-7.36723			142.6	11.1693	142.6	8.11759
	142.8	2.70357	142.8	-4.62064			142.8	14.5263	142.8	4.76066
	143	3.6191	143	-3.09476			143	13.9159	143	5.67618
	143.2	0.87252	143.2	0.567344			143.2	15.1366	143.2	4.1503
	143.4	1.48287	143.4	-4.01029			143.4	12.39	143.4	5.37101
	143.6	4.83981	143.6	-7.6724			143.6	14.5263	143.6	3.84513
	143.8	3.00875	143.8	-7.06205			143.8	12.6952	143.8	6.28653
	144	2.70357	144	-3.39994			144	9.94864	144	5.67618
	144.2	2.09322	144.2	-3.09476			144.2	11.1693	144.2	5.37101
	144.4	3.6191	144.4	-0.0430071			144.4	15.1366	144.4	8.42276
	144.6	1.48287	144.6	-1.26371			144.6	17.578	144.6	8.11759
	144.8	-0.0430071	144.8	-3.70512			144.8	15.1366	144.8	2.62443
	145	2.09322	145	-1.26371			145	11.7797	145	8.72794
	145.2	1.78805	145.2	-1.56889			145.2	10.8642	145.2	9.03312
	145.4	3.6191	145.4	-3.70512			145.4	14.5263	145.4	6.28653
	145.6	4.22945	145.6	-4.62064			145.6	13.9159	145.6	6.89689
	145.8	4.22945	145.8	-2.78959			145.8	13.9159	145.8	5.67618
	146	5.14498	146	-5.84135			146	12.6952	146	7.81241
	146.2	5.14498	146.2	-5.231			146.2	14.5263	146.2	8.11759
	146.4	4.83981	146.4	-8.28275			146.4	15.1366	146.4	6.28653
	146.6	9.41744	146.6	-5.84135			146.6	11.7797	146.6	5.37101
	146.8	5.81647	146.8	1.23884			146.8	13.079	146.8	7.28062
	147	2.63866	147	5.38525			147	21.6114	147	20.6959
	147.2	3.99869	147.2	0.641752			147.2	15.919	147.2	1.88088
	147.4	1.90226	147.4	-5.72713			147.4	12.4188	147.4	-0.703773
	147.6	2.4131	147.6	-7.96288			147.6	13.9198	147.6	3.54378
	147.8	4.77116	147.8	-8.04622			147.8	12.1634	147.8	2.70299
	148	4.6087	148	-4.85175			148	15.7446	148	5.3686
	148.2	4.05043	148.2	0.693494			148.2	19.4627	148.2	5.42465
	148.4	5.09581	148.4	-2.83876			148.4	18.5597	148.4	4.82676
	148.6	4.10633	148.6	-2.60754			148.6	16.6414	148.6	6.26545
	148.8	6.43438	148.8	-2.7209			148.8	16.7473	148.8	7.28685
	149	5.60787	149	-2.93705			149	18.1548	149	6.55816
	149.2	5.16022	149.2	-0.0277715			149.2	15.8567	149.2	6.09106
	149.4	0.773942	149.4	2.29982			149.4	15.7757	149.4	7.2308
	149.6	0.367781	149.6	3.41954			149.6	15.4145	149.6	5.95404
	149.8	5.15679	149.8	1.79985			149.8	17.7189	149.8	5.81702
	150	7.81466	150	-1.03544			150	14.0817	150	3.40053
	150.2	6.81466	150.2	-1.73026			150.2	16.2117	150.2	1.86842
	150.4	6.73404	150.4	-3.03158			150.4	19.3755	150.4	7.16852
	150.6	4.21562	150.6	-6.16036			150.6	17.4448	150.6	4.93264
	150.8	2.92131	150.8	-7.14949			150.8	19.6683	150.8	2.57842
	151	2.85096	151	-4.47326			151	18.8356	151	4.18717
	151.2	2.78372	151.2	-0.268037			151.2	16.8144	151.2	3.99699
	151.4	6.07638	151.4	3.94015			151.4	16.9603	151.4	5.3636
	151.6	7.54083	151.6	-0.698916			151.6	15.301	151.6	6.14574
	151.8	7.78729	151.8	-2.28351			151.8	18.8514	151.8	8.17025
	152	4.06905	152	-4.47587			152	17.5371	152	5.02493
	152.2	2.18435	152.2	-5.44505			152.2	17.764	152.2	4.94657
	152.4	0.912365	152.4	-3.66527			152.4	14.3414	152.4	3.04989
	152.6	4.83064	152.6	-1.27288			152.6	17.6434	152.6	1.16387
	152.8	7.83554	152.8	-0.404203			152.8	16.6818	152.8	5.69547
	153	5.34935	153	-2.89039			153	15.7277	153	6.26727
	153.2	4.6962	153.2	-0.796964			153.2	15.6954	153.2	5.01427
	153.4	5.87599	153.4	0.688001			153.4	17.4994	153.4	5.59758
	153.6	6.14206	153.6	-1.18216			153.6	19.0027	153.6	5.8801
	153.8	2.44257	153.8	-1.52472			153.8	18.6785	153.8	4.03007
	154	4.23789	154	-3.3915			154	18.6626	154	2.79348
	154.2	3.59339	154.2	-3.42565			154.2	18.3441	154.2	5.52675
	154.4	2.95039	154.4	-0.101363			154.4	16.1968	154.4	4.90525
	154.6	2.61402	154.6	-0.132565			154.6	18.934	154.6	3.98039
	154.8	5.0256	154.8	-1.38309			154.8	16.79	154.8	3.97257
	155	4.99709	155	-5.68406			155	16.4782	155	4.2712
	155.2	4.66467	155.2	-4.49061			155.2	19.2193	155.2	3.35018
	155.4	5.24897	155.4	-4.82183			155.4	18.9096	155.4	6.70252
	155.6	3.39302	155.6	-1.79496			155.6	17.3798	155.6	7.91938
	155.8	3.97958	155.8	-1.81876			155.8	16.7662	155.8	3.64369
	156	2.12578	156	-3.67256			156	16.7635	156	1.50476
	156.2	3.62992	156.2	-7.05123			156.2	19.813	156.2	8.21637
	156.4	3.60914	156.4	-6.15649			156.4	19.2008	156.4	7.60412
	156.6	2.67375	156.6	-4.65047			156.6	14.9268	156.6	4.85595
	156.8	1.73924	156.8	-2.53322			156.8	17.672	156.8	6.07533
	157	2.63662	157	-2.85655			157	18.8916	157	7.90527
	157.2	0.788215	157.2	-5.01012			157.2	17.9751	157.2	5.46293
	157.4	0.161284	157.4	-4.41635			157.4	16.4485	157.4	6.0725
	157.6	0.450612	157.6	-3.82185			157.6	18.2789	157.6	6.98737
	157.8	3.48722	157.8	-6.2784			157.8	17.3628	157.8	4.85059
	158	5.60897	158	-2.93595			158	19.4986	158	5.15531
	158.2	4.98478	158.2	-6.30672			158.2	18.5827	158.2	4.2394
	158.4	2.53015	158.4	-7.84583			158.4	15.5306	158.4	6.07013
	158.6	3.12785	158.6	-2.97566			158.6	18.2769	158.6	7.59574
	158.8	2.50542	158.8	-2.68257			158.8	16.4456	158.8	3.32305
	159	0.967986	159	-2.38895			159	17.6661	159	6.37462
	159.2	0.346592	159.2	-6.67245			159.2	19.1918	159.2	5.45893
	159.4	3.69297	159.4	-4.85195			159.4	16.7503	159.4	6.6795
	159.6	2.157	159.6	-5.16721			159.6	15.8347	159.6	10.0363
	159.8	1.84218	159.8	-2.43028			159.8	17.3605	159.8	6.37412
	160	3.05367	160	-4.27055			160	15.8345	160	6.37405
	160.2	5.48627	160.2	-4.27936			160.2	18.2758	160.2	8.51021
	160.4	4.86749	160.4	-6.72919			160.4	17.6654	160.4	7.59463
	160.6	2.11286	160.6	-8.26311			160.6	14.3084	160.6	5.15318
	160.8	3.0207	160.8	-7.66046			160.8	16.1395	160.8	3.93244
	161	4.23405	161	-3.39535			161	16.4446	161	10.0359
	161.2	3.92184	161.2	-5.23343			161.2	17.9705	161.2	6.98413
	161.4	2.38924	161.4	-3.71427			161.4	16.4446	161.4	4.84788
	161.6	4.82423	161.6	-6.46728			161.6	19.8015	161.6	8.50997
	161.8	6.64914	161.8	-4.94754			161.8	17.6652	161.8	6.98408
	162	6.03292	162	-6.17411			162	14.3083	162	5.45818
	162.2	3.58591	162.2	-2.21243			162.2	14.9186	162.2	5.45817
	162.4	5.4116	162.4	0.833966			162.4	15.2238	162.4	11.2565
	162.6	4.18578	162.6	-0.0866849			162.6	17.0548	162.6	10.6461
	162.8	6.62228	162.8	-1.31229			162.8	16.1393	162.8	6.98403
	163	2.65032	163	-2.53767			163	15.5289	163	4.84779
	163.2	2.03549	163.2	-3.45767			163.2	17.36	163.2	6.98402
	163.4	3.25192	163.4	-2.8516			163.4	16.1393	163.4	8.81507
	163.6	3.553	163.6	-3.16086			163.6	15.5289	163.6	7.28919
	163.8	2.63357	163.8	-7.74241			163.8	16.7496	163.8	4.23743
	164	3.54536	164	-4.38921			164	15.8341	164	6.67883
	164.2	4.45732	164.2	-2.25655			164.2	16.7496	164.2	10.0358
	164.4	7.20049	164.4	-3.48066			164.4	15.8341	164.4	6.37365
	164.6	5.36617	164.6	-6.53568			164.6	13.3927	164.6	8.81506
	164.8	3.22682	164.8	-8.06468			164.8	14.9186	164.8	7.28918
	165	2.00314	165	-3.7952			165	19.8014	165	7.28918
	165.2	2.30547	165.2	2.30547			165.2	16.1393	165.2	7.89953
	165.4	4.1338	165.4	0.47169			165.4	15.2237	165.4	7.28917
	165.6	4.74155	165.6	-2.88785			165.6	15.2237	165.6	8.50988
	165.8	5.04424	165.8	-4.11104			165.8	17.0548	165.8	9.12023
	166	1.9901	166	-8.0807			166	18.2755	166	5.15294
	166.2	2.59818	166.2	-5.64157			166.2	17.9703	166.2	3.32189
	166.4	2.90118	166.4	-5.94891			166.4	15.8341	166.4	8.2047
	166.6	2.28876	166.6	-5.95099			166.6	17.6651	166.6	7.28917
	166.8	1.37124	166.8	-2.29087			166.8	19.191	166.8	6.37364
	167	1.67452	167	-2.29276			167	17.6651	167	6.06847
	167.2	3.50376	167.2	-2.90493			167.2	15.5289	167.2	5.76329
	167.4	5.63826	167.4	-3.82219			167.4	19.4962	167.4	8.81505
	167.6	5.02625	167.6	-1.99279			167.6	18.8858	167.6	5.45812
	167.8	4.41432	167.8	-2.29955			167.8	17.0548	167.8	4.23741
	168	4.71798	168	-1.69071			168	14.003	168	3.93224
	168.2	2.5803	168.2	2.5803			168.2	19.8014	168.2	6.98399
	168.4	2.27374	168.4	-1.38837			168.4	22.548	168.4	4.23741
	168.6	2.27242	168.6	-3.52592			168.6	17.9703	168.6	4.54259
	168.8	2.27116	168.8	-4.44271			168.8	18.2755	168.8	5.45812
	169	4.40618	169	-2.61286			169	17.0548	169	6.06847
	169.2	2.87915	169.2	-2.30884			169.2	17.9703	169.2	6.06847
	169.4	1.96252	169.4	0.131462			169.4	19.191	169.4	6.67882
	169.6	1.96146	169.6	-0.174768			169.6	17.9703	169.6	9.12022
	169.8	5.92774	169.8	-1.0913			169.8	17.36	169.8	6.06847
	170	6.23195	170	-2.31297			170	20.1066	170	4.23741
	170.2	2.26375	170.2	0.432691			170.2	20.7169	170.2	1.49083
	170.4	4.70427	170.4	-1.70442			170.4	15.5289	170.4	3.93224
	170.6	8.06036	170.6	-1.40009			170.6	17.0548	170.6	6.67882
	170.8	6.53368	170.8	-3.53712			170.8	17.6651	170.8	4.84776
	171	5.00703	171	-5.67412			171	18.5807	171	7.89952
	171.2	3.17524	171.2	-5.67485			171.2	18.2755	171.2	7.89952
	171.4	5.92112	171.4	-2.92898			171.4	19.4962	171.4	7.59435
	171.6	6.5308	171.6	-3.54			171.6	17.9703	171.6	6.98399
	171.8	1.64735	171.8	-7.50792			171.8	17.36	171.8	7.28917
	172	3.17261	172	-9.33959			172	19.191	172	4.23741
	172.2	2.56168	172.2	-9.95053			172.2	17.0548	172.2	3.62706
	172.4	1.95076	172.4	-9.03556			172.4	17.9703	172.4	6.67882
	172.6	6.83304	172.6	-3.54294			172.6	19.191	172.6	6.37364
	172.8	5.61183	172.8	-3.54345			172.8	17.6651	172.8	2.40636
	173	-1.40771	173	-5.68017			173	16.7496	173	6.06847
	173.2	-0.492647	173.2	-5.98581			173.2	14.9186	173.2	8.2047
	173.4	2.86384	173.4	-5.98626			173.4	19.191	173.4	10.3409
	173.6	2.25306	173.6	-3.54528			173.6	18.5807	173.6	6.67882
	173.8	-0.799106	173.8	-2.01981			173.8	16.4444	173.8	4.54259
	174	1.64191	174	-4.76678			174	17.9703	174	10.3409
	174.2	2.25189	174.2	-3.24128			174.2	21.0221	174.2	9.12022
	174.4	3.77741	174.4	-1.71575			174.4	17.9703	174.4	10.9513
	174.6	2.55637	174.6	-1.71609			174.6	15.2237	174.6	9.4254
	174.8	2.55604	174.8	-1.71642			174.8	18.8858	174.8	6.67882
	175	1.02985	175	-3.24261			175	17.36	175	8.2047
	175.2	2.86061	175.2	-4.46361			175.2	15.5289	175.2	4.84776
	175.4	4.69138	175.4	-3.24319			175.4	14.3082	175.4	9.12022
	175.6	4.08075	175.6	-3.54864			175.6	17.36	175.6	11.5616
	175.8	1.02874	175.8	-2.3282			175.8	17.36	175.8	7.59435
	176	1.02849	176	-0.497392			176	18.2755	176	6.67882
	176.2	2.24895	176.2	-2.32868			176.2	17.0548	176.2	8.81505
	176.4	5.60566	176.4	-4.77032			176.4	14.3082	176.4	6.37364
	176.6	4.38474	176.6	-3.24466			176.6	19.191	176.6	7.28917
	176.8	1.63795	176.8	-3.55004			176.8	15.2237	176.8	9.12022
	177	0.722223	177	-1.10883			177	15.8341	177	8.81505
	177.2	1.33239	177.2	-2.02455			177.2	15.2237	177.2	6.67882
	177.4	4.07879	177.4	-2.94026			177.4	16.1393	177.4	8.2047
	177.6	6.21484	177.6	-6.29736			177.6	17.36	177.6	11.2565
	177.8	6.51985	177.8	-3.24577			177.8	16.7496	177.8	11.2565
	178	5.90934	178	-1.72005			178	14.9186	178	6.37364
	178.2	5.90919	178.2	-2.9409			178.2	16.1393	178.2	3.62706
	178.4	6.5194	178.4	-3.5514			178.4	15.2237	178.4	9.4254
	178.6	6.51926	178.6	-2.02566			178.6	16.7496	178.6	8.2047
	178.8	1.94149	178.8	-2.33097			178.8	16.1393	178.8	5.76329
	179	1.33101	179	-1.72074			179	16.7496	179	8.81505
	179.2	5.60335	179.2	-2.94157			179.2	16.7496	179.2	6.37364
	179.4	5.29806	179.4	-0.500276			179.4	14.3082	179.4	6.37364
	179.6	3.77207	179.6	-1.72109			179.6	14.3082	179.6	5.15294
	179.8	4.38232	179.8	-0.805667			179.8	16.1393	179.8	8.2047
	180	0.720111	180	-0.500592			180	17.36	180	8.81505
	180.2	3.4666	180.2	2.85625			180.2	16.1393	180.2	6.98399
	180.4	2.85615	180.4	-0.805956			180.4	19.191	180.4	6.37364
	180.6	3.16124	180.6	-3.24745			180.6	17.36	180.6	7.28917
	180.8	4.68704	180.8	-3.85789			180.8	14.3082	180.8	8.2047
	181	6.82319	181	-5.38385			181	16.1393	181	6.98399
	181.2	7.43346	181.2	-3.55287			181.2	18.2755	181.2	7.59435
	181.4	5.60233	181.4	-2.63741			181.4	17.36	181.4	8.2047
	181.6	6.82297	181.6	-2.63748			181.6	15.5289	181.6	6.06847
	181.8	5.29702	181.8	-3.55308			181.8	18.2755	181.8	5.76329
	182	7.12801	182	-5.3842			182	18.2755	182	8.2047
	182.2	4.99172	182.2	-3.85838			182.2	15.2237	182.2	8.2047
	182.4	6.21236	182.4	1.63473			182.4	17.9703	182.4	8.2047
	182.6	6.82266	182.6	0.413967			182.6	13.3927	182.6	6.06847
	182.8	4.3812	182.8	-0.196438			182.8	14.6134	182.8	6.06847
	183	8.04326	183	-1.41719			183	18.8858	183	4.54259
	183.2	5.6018	183.2	-3.2483			183.2	20.7169	183.2	4.84776
	183.4	7.43281	183.4	-1.41729			183.4	17.9703	183.4	8.50987
	183.6	4.07583	183.6	-0.806981			183.6	16.1393	183.6	7.89952
	183.8	4.68614	183.8	-2.3329			183.8	14.6134	183.8	2.40636
	184	7.12751	184	-2.9433			184	14.6134	184	5.45812
	184.2	7.12747	184.2	-0.196752			184.2	17.6651	184.2	2.10118
	184.4	7.12743	184.4	-0.807141			184.4	14.6134	184.4	4.54259
	184.6	6.21187	184.6	-3.55376			184.6	18.5807	184.6	3.32189
	184.8	5.90666	184.8	-3.55379			184.8	17.36	184.8	7.89952
	185	5.90662	185	-2.94347			185	15.8341	185	6.67882
	185.2	5.90659	185.2	-6.60561			185.2	17.0548	185.2	5.76329
	185.4	3.77033	185.4	-6.30047			185.4	17.36	185.4	5.45812
	185.6	2.24443	185.6	-1.41768			185.6	19.191	185.6	6.06847
	185.8	2.54957	185.8	-1.41771			185.8	18.8858	185.8	6.06847
	186	5.90648	186	-2.33326			186	17.9703	186	6.37364
	186.2	6.21163	186.2	-0.807411			186.2	19.191	186.2	6.06847
	186.4	4.99091	186.4	-2.33331			186.4	14.003	186.4	3.93224
	186.6	4.38053	186.6	-1.72298			186.6	15.8341	186.6	6.06847
	186.8	7.12709	186.8	-1.11265			186.8	17.36	186.8	7.59435
	187	7.12707	187	-5.07996			187	20.7169	187	6.37364
	187.2	5.60117	187.2	-4.16445			187.2	17.9703	187.2	6.06847
	187.4	2.5494	187.4	-4.46965			187.4	19.8014	187.4	4.54259
	187.6	2.2442	187.6	-4.77484			187.6	18.2755	187.6	6.98399
	187.8	5.29594	187.8	-2.9438			187.8	17.36	187.8	3.62706
	188	1.63382	188	-2.63864			188	17.0548	188	5.76329
	188.2	-0.50243	188.2	-2.02831			188.2	14.3082	188.2	7.28917
	188.4	1.93896	188.4	-2.3335			188.4	17.9703	188.4	4.23741
	188.6	4.68553	188.6	-3.85939			188.6	18.5807	188.6	7.28917
	188.8	5.29587	188.8	-4.46976			188.8	18.5807	188.8	6.37364
	189	6.51656	189	-2.63872			189	15.8341	189	7.28917
	189.2	6.51654	189.2	-2.63873			189.2	18.2755	189.2	7.28917
	189.4	5.29583	189.4	-3.24909			189.4	18.5807	189.4	7.28917
	189.6	-0.502523	189.6	-2.63875			189.6	16.4444	189.6	6.06847
	189.8	2.8544	189.8	-3.24912			189.8	18.2755	189.8	6.98399
	190	2.85439	190	-4.16465			190	17.0548	190	9.12022
	190.2	5.29578	190.2	-6.30089			190.2	16.1393	190.2	7.59435
	190.4	5.90613	190.4	-6.3009			190.4	16.4444	190.4	8.81505
	190.6	7.12682	190.6	-7.52162			190.6	16.4444	190.6	8.81505
	190.8	8.34751	190.8	-3.85952			190.8	15.5289	190.8	8.81505
	191	6.82163	191	-2.944			191	17.6651	191	6.37364
	191.2	0.412929	191.2	0.718104			191.2	15.5289	191.2	7.28917
	191.4	1.63362	191.4	-1.72331			191.4	17.6651	191.4	10.3409
	191.6	3.1595	191.6	-1.11297			191.6	17.0548	191.6	6.37364
	191.8	3.46466	191.8	-0.502621			191.8	16.1393	191.8	6.67882
	192	3.15948	192	-3.24921			192	15.8341	192	4.84776
	192.2	1.93877	192.2	-3.85957			192.2	16.4444	192.2	5.45812
	192.4	0.718063	192.4	-0.807816			192.4	19.191	192.4	6.67882
	192.6	1.32841	192.6	1.32841			192.6	15.8341	192.6	8.50987
	192.8	3.76981	192.8	-1.72335			192.8	16.7496	192.8	10.0358
	193	2.5491	193	-3.85959			193	17.0548	193	9.12022
	193.2	1.93874	193.2	-1.11301			193.2	10.3409	193.2	7.28917
	193.4	1.32839	193.4	-4.16478			193.4	14.3082	193.4	9.4254
	193.6	1.63356	193.6	-6.30101			193.6	15.5289	193.6	9.4254
	193.8	3.15943	193.8	-5.08031			193.8	13.0875	193.8	8.2047
	194	1.0232	194	-4.77514			194	16.4444	194	6.98399
	194.2	0.718019	194.2	0.718019			194.2	14.9186	194.2	10.6461
	194.4	1.02319	194.4	0.107663			194.4	12.7823	194.4	9.12022
	194.6	4.38012	194.6	-2.02857			194.6	15.5289	194.6	10.3409
	194.8	0.412832	194.8	-4.46998			194.8	16.7496	194.8	12.7823
	195	1.32836	195	-2.63893			195	17.9703	195	8.2047
	195.2	2.24388	195.2	0.107649			195.2	16.7496	195.2	9.12022
	195.4	4.99046	195.4	1.63353			195.4	14.3082	195.4	7.59435
	195.6	4.68528	195.6	-2.02859			195.6	14.6134	195.6	7.89952
	195.8	4.07493	195.8	-3.55447			195.8	11.5616	195.8	8.81505
	196	1.02317	196	-1.41824			196	15.5289	196	7.59435
	196.2	1.93869	196.2	-3.85965			196.2	15.2237	196.2	8.81505
	196.4	8.0422	196.4	-4.47			196.4	13.6979	196.4	9.4254
	196.6	8.34738	196.6	-2.33378			196.6	17.0548	196.6	5.76329
	196.8	4.9293	196.8	-2.08974			196.8	16.3659	196.8	6.90543
	197	-1.04817	197	-10.8138			197	7.52824	197	3.25578
	197.2	-2.71337	197.2	-7.90135			197.2	14.4414	197.2	14.7466
	197.4	0.298584	197.4	-1.83765			197.4	14.5847	197.4	12.4484
	197.6	4.97573	197.6	1.31362			197.6	16.4406	197.6	10.9475
	197.8	3.22802	197.8	1.09179			197.8	12.0934	197.8	7.51579
	198	3.08531	198	-0.576804			198	14.6158	198	5.7657
	198.2	0.286641	198.2	-1.54441			198.2	14.2546	198.2	7.5407
	198.4	3.20855	198.4	-4.11567			198.4	13.0214	198.4	8.44377
	198.6	3.89285	198.6	-0.989967			198.6	12.4982	198.6	5.4792
	198.8	7.66831	198.8	-2.09731			198.8	14.2234	198.8	7.81473
	199	7.57929	199	-4.01739			199	11.29	199	7.93307
	199.2	4.67001	199.2	-1.73868			199.2	11.4519	199.2	5.34842
	199.4	3.86829	199.4	-0.404167			199.4	17.3312	199.4	2.37762
	199.6	3.05375	199.6	-1.52389			199.6	16.4718	199.6	5.18026
	199.8	1.62168	199.8	-0.514554			199.8	15.3881	199.8	6.84315
	200	2.01556	200	-2.86725			200	16.5839	200	3.46131
	200.2	5.15179	200.2	-2.47761			200.2	11.4021	200.2	4.68824
	200.4	5.2324	200.4	-3.92287			200.4	15.2573	200.4	4.88131
	200.6	3.47837	200.6	-3.84585			200.6	15.3569	200.6	0.708498
	200.8	1.41574	200.8	-4.68777			200.8	14.3542	200.8	4.28341
	201	3.9275	201	-0.344965			201	13.0506	201	3.59019
	201.2	5.52061	201.2	-2.10878			201.2	13.8512	201.2	2.25449
	201.4	5.89006	201.4	-0.51863			201.4	15.2311	201.4	6.07587
	201.6	4.42561	201.6	-0.762374			201.6	16.8904	201.6	5.29374
	201.8	0.822223	201.8	-1.00883			201.8	14.8659	201.8	2.65887
	202	-0.342354	202	-4.91999			202	15.5698	202	2.44726
	202.2	0.931997	202.2	-4.86634			202.2	14.4275	202.2	3.74632
	202.4	4.03503	202.4	-1.76331			202.4	13.2724	202.4	3.81195
	202.6	1.94782	202.6	-1.71429			202.6	15.1584	202.6	-0.10037
	202.8	5.04642	202.8	-2.88815			202.8	16.12	202.8	5.744
	203	3.26015	203	-3.75889			203	15.243	203	6.08774
	203.2	-0.969507	203.2	-7.3782			203.2	17.1064	203.2	4.89932
	203.4	0.29211	203.4	-7.94764			203.4	15.6075	203.4	4.01084
	203.6	3.38297	203.6	-4.85677			203.6	14.7146	203.6	5.55937
	203.8	4.33588	203.8	-4.81939			203.8	15.0388	203.8	4.96799
	204	3.15091	204	-4.47849			204	17.1909	204	4.67871
	204.2	2.87988	204.2	-2.91846			204.2	14.7628	204.2	3.77649
	204.4	5.04876	204.4	-5.6324			204.4	16.605	204.4	4.39799
	204.6	5.99548	204.6	-6.21155			204.6	14.4781	204.6	3.4918
	204.8	3.27873	204.8	-3.43514			204.8	13.2652	204.8	3.80479
	205	4.22276	205	-0.965227			205	15.1028	205	1.36994
	205.2	3.33448	205.2	-4.90526			205.2	16.0239	205.2	4.73236
	205.4	4.58123	205.4	-4.87922			205.4	17.8595	205.4	4.1266
	205.6	2.16472	205.6	-2.71809			205.6	17.5582	205.6	5.65633
	205.8	3.10404	205.8	-6.66158			205.8	13.8993	205.8	4.43885
	206	4.95784	206	-5.11296			206	12.9865	206	4.74673
	206.2	4.97958	206.2	-5.70157			206.2	16.0405	206.2	3.52828
	206.4	3.77966	206.4	-4.15491			206.4	17.8734	206.4	1.08877
	206.6	1.05294	206.6	-2.304			206.6	15.7388	206.6	3.53177
	206.8	4.73403	206.8	-1.06431			206.8	13.9091	206.8	5.9745
	207	2.31077	207	1.70042			207	13.2998	207	4.14456
	207.2	2.93847	207.2	-1.94434			207.2	15.7422	207.2	5.3662
	207.4	3.87058	207.4	-3.45364			207.4	14.2171	207.4	5.0618
	207.6	-1.91191	207.6	-4.96367			207.6	14.5229	207.6	3.53658
	207.8	0.849815	207.8	-3.11747			207.8	17.8804	207.8	3.8423
	208	4.83158	208	-2.18746			208	16.9653	208	3.84276
	208.2	2.70919	208.2	-3.39433			208.2	16.0502	208.2	4.75867
	208.4	3.94312	208.4	-3.99145			208.4	13.9143	208.4	4.75899
	208.6	5.48164	208.6	-1.23222			208.6	12.0835	208.6	6.89549
	208.8	4.88338	208.8	-0.609787			208.8	15.4406	208.8	7.2009
	209	2.7587	209	-1.81894			209	15.4408	209	4.4545
	209.2	2.15939	209.2	-4.2493			209.2	15.1358	209.2	5.06501
	209.4	3.39065	209.4	-6.37498			209.4	12.6945	209.4	2.01339
	209.6	3.70591	209.6	-7.28042			209.6	13.6102	209.6	3.2342
	209.8	4.93626	209.8	-7.27077			209.8	13.6103	209.8	6.8964
	210	5.55583	210	-6.65121			210	16.6621	210	8.11719
	210.2	5.56464	210.2	0.0714715			210.2	13.3052	210.2	4.76032
	210.4	3.13165	210.4	0.0798925			210.4	13.3053	210.4	3.23449
	210.6	2.52935	210.6	1.00347			210.6	15.7467	210.6	3.84489
	210.8	4.67327	210.8	-2.95612			210.8	13.0002	210.8	2.9294
	211	1.62887	211	-2.03324			211	12.6951	211	2.62426
	211.2	3.16178	211.2	-0.500333			211.2	14.221	211.2	2.62429
	211.4	1.33744	211.4	-1.71432			211.4	17.8831	211.4	4.15019
	211.6	1.03869	211.6	-2.31825			211.6	16.0521	211.6	4.15021
	211.8	2.5707	211.8	-4.14316			211.8	14.5262	211.8	3.23469
	212	3.18692	212	-2.61142			212	15.7469	212	2.62436
	212.2	5.32876	212.2	-1.38511			212.2	13.9159	212.2	3.84507
	212.4	5.02895	212.4	-2.90562			212.4	11.7797	212.4	9.33824
	212.6	0.151258	212.6	-2.29015			212.6	15.1366	212.6	3.53991
	212.8	-1.6749	212.8	-2.8956			212.8	16.6625	212.8	3.84509
	213	0.771189	213	-1.97539			213	16.3573	213	7.50721
	213.2	2.91189	213.2	-2.27609			213.2	16.3573	213.2	3.53993
	213.4	4.74723	213.4	-1.05111			213.4	14.2211	213.4	4.45546
	213.6	5.97202	213.6	-2.87808			213.6	15.747	213.6	3.23476
	213.8	0.482761	213.8	-2.87417			213.8	14.8314	213.8	4.76064
	214	2.9279	214	0.18132			214	12.6952	214	5.371
	214.2	3.847	214.2	0.490066			214.2	15.1366	214.2	1.40371
	214.4	3.85041	214.4	-3.47381			214.4	15.747	214.4	5.06582
	214.6	3.24332	214.6	-2.24984			214.6	13.3056	214.6	6.89688
	214.8	1.72056	214.8	-2.24672			214.8	15.747	214.8	2.62442
	215	2.33389	215	-0.107513			215	14.8315	215	2.01407
	215.2	1.42121	215.2	0.505687			215.2	11.7797	215.2	2.31925
	215.4	4.47569	215.4	-1.62782			215.4	14.8315	215.4	3.23477
	215.6	3.25759	215.6	-2.84592			215.6	14.2211	215.6	2.31925
	215.8	0.5135	215.8	-2.53826			215.8	16.0522	215.8	3.53995
	216	1.12623	216	-2.84106			216	19.1039	216	4.76065
	216.2	2.04403	216.2	-4.36466			216.2	14.2211	216.2	-1.34286
	216.4	3.57208	216.4	-6.19354			216.4	10.8642	216.4	1.40372
	216.6	2.04828	216.6	-2.52936			216.6	15.747	216.6	5.98136
	216.8	2.66061	216.8	-4.35843			216.8	15.4418	216.8	0.79337
	217	2.66251	217	-4.66171			217	15.747	217	1.09855
	217.2	2.9695	217.2	-4.35472			217.2	15.4418	217.2	0.488194
	217.4	5.41264	217.4	-1.91158			217.4	16.0522	217.4	1.09855
	217.6	9.07641	217.6	-4.6565			217.6	14.2211	217.6	4.76066
	217.8	6.33141	217.8	-4.34974			217.8	17.578	217.8	2.01407
	218	7.24845	218	-2.212			218	16.9677	218	1.09855
	218.2	6.33437	218.2	-3.73643			218.2	13.9159	218.2	1.7089
	218.4	5.11505	218.4	-3.42987			218.4	14.5263	218.4	1.7089
	218.6	2.36979	218.6	-0.987146			218.6	16.3573	218.6	5.37101
	218.8	0.845172	218.8	-5.56352			218.8	15.4418	218.8	4.1503
	219	1.76191	219	-6.47784			219	14.2211	219	0.183019
	219.2	0.847534	219.2	-7.39221			219.2	13.0004	219.2	2.62443
	219.4	4.20557	219.4	-6.78076			219.4	16.3573	219.4	4.1503
	219.6	6.95321	219.6	-6.16935			219.6	18.1884	219.6	3.53995
	219.8	2.98693	219.8	-2.81141			219.8	17.8832	219.8	2.9296
	220	0.241312	220	-1.28457			220	15.747	220	1.40372
	220.2	-0.673294	220.2	-4.03023			220.2	15.747	220.2	6.28653
	220.4	4.51557	220.4	-5.25005			220.4	17.8832	220.4	4.45548
	220.6	7.56817	220.6	-6.16474			220.6	15.747	220.6	0.183019
	220.8	3.29652	220.8	-5.55358			220.8	16.6625	220.8	2.9296
	221	1.77141	221	-4.63728			221	13.9159	221	3.23478
	221.2	2.68767	221.2	-5.85725			221.2	16.3573	221.2	3.23478
	221.4	2.99355	221.4	-6.4669			221.4	17.8832	221.4	5.98136
	221.6	3.60457	221.6	-5.24553			221.6	17.2729	221.6	5.98136
	221.8	2.68968	221.8	-4.02418			221.8	16.3573	221.8	2.9296
	222	4.21618	222	-1.27699			222	16.9677	222	0.793371
	222.2	4.21676	222.2	-2.4971			222.2	19.1039	222.2	4.76066
	222.4	-0.360313	222.4	-0.360313			222.4	16.0522	222.4	3.53995
	222.6	0.55575	222.6	-0.359778			222.6	15.1366	222.6	2.9296
	222.8	2.99767	222.8	-2.4955			222.8	17.2729	222.8	1.09855
	223	1.1671	223	-1.88465			223	15.4418	223	4.76066
	223.2	1.77792	223.2	-2.18936			223.2	14.5263	223.2	1.7089
	223.4	2.08354	223.4	-1.57856			223.4	15.747	223.4	6.28653
	223.6	-0.0522581	223.6	0.252918			223.6	13.6108	223.6	2.9296
	223.8	-1.57773	223.8	-1.57773			223.8	15.747	223.8	6.59171
	224	-0.966986	224	-1.88251			224	16.3573	224	7.20206
	224.2	1.16962	224.2	-2.49249			224.2	14.5263	224.2	5.67618
	224.4	3.61138	224.4	-0.966256			224.4	16.3573	224.4	6.59171
	224.6	1.17031	224.6	-6.76425			224.6	13.0004	224.6	2.01407
	224.8	3.0017	224.8	-5.8484			224.8	15.1366	224.8	5.06583
	225	3.91753	225	-4.01704			225	17.578	225	4.76066
	225.2	2.69713	225.2	-2.49086			225.2	17.578	225.2	3.53995
	225.4	0.866359	225.4	-5.54233			225.4	14.2211	225.4	5.67618
	225.6	1.47698	225.6	-2.79548			225.6	13.3056	225.6	3.53995
	225.8	4.22382	225.8	-1.26934			225.8	16.0522	225.8	5.37101
	226	6.66548	226	-1.87944			226	17.578	226	2.9296
	226.2	3.00361	226.2	-3.09991			226.2	18.1884	226.2	3.84513
	226.4	5.14007	226.4	-5.23591			226.4	14.5263	226.4	4.1503
	226.6	4.22475	226.6	-4.93052			226.6	11.1693	226.6	4.76066
	226.8	3.61461	226.8	-7.67689			226.8	15.747	226.8	3.84513
	227	6.05622	227	-7.98187			227	16.0522	227	3.23478
	227.2	3.92017	227.2	-8.28686			227.2	15.4418	227.2	2.62443
	227.4	2.0893	227.4	-3.40386			227.4	12.39	227.4	5.06583
	227.6	3.61535	227.6	1.47912			227.6	10.8642	227.6	4.1503
	227.8	4.53105	227.8	-1.87765			227.8	15.1366	227.8	2.01407
	228	3.00533	228	-1.57231			228	17.578	228	3.84513
	228.2	3.31065	228.2	-0.656633			228.2	13.9159	228.2	1.7089
	228.4	-0.351312	228.4	-1.57202			228.4	13.9159	228.4	4.1503
	228.6	0.564353	228.6	-2.4874			228.6	13.0004	228.6	3.53995
	228.8	2.09036	228.8	-3.4028			228.8	15.1366	228.8	3.84513
	229	4.83707	229	-7.98031			229	14.5263	229	5.67618
	229.2	5.75272	229.2	-7.67501			229.2	13.9159	229.2	3.84513
	229.4	3.92178	229.4	-4.92832			229.4	13.3056	229.4	0.183019
	229.6	2.39601	229.6	-0.0453936			229.6	14.5263	229.6	1.09855
	229.8	4.53235	229.8	2.09094			229.8	13.3056	229.8	3.53995
	230	3.00657	230	-1.87624			230	16.9677	230	3.53995
	230.2	4.22737	230.2	-0.655443			230.2	14.2211	230.2	1.40372
	230.4	3.00676	230.4	-1.87605			230.4	13.3056	230.4	0.488195
	230.6	7.27931	230.6	0.870616			230.6	17.578	230.6	-0.427332
	230.8	6.36386	230.8	0.8707			230.8	15.747	230.8	1.7089
	231	4.22771	231	0.870781			231	13.9159	231	4.45548
	231.2	3.92262	231.2	-1.26537			231.2	13.9159	231.2	4.45548
	231.4	3.61751	231.4	2.09163			231.4	14.2211	231.4	5.98136
	231.6	2.70206	231.6	-0.0445263			231.6	16.6625	231.6	2.62443
	231.8	4.83835	231.8	-2.79104			231.8	17.8832	231.8	0.488195
	232	4.22807	232	-4.62203			232	16.6625	232	3.53995
	232.2	3.61778	232.2	-3.09609			232.2	14.8315	232.2	2.9296
	232.4	2.09196	232.4	-0.349451			232.4	16.0522	232.4	2.62443
	232.6	2.39719	232.6	-3.09598			232.6	18.1884	232.6	2.62443
	232.8	4.53347	232.8	-5.23215			232.8	13.0004	232.8	-0.732508
	233	7.2801	233	-4.0114			233	15.1366	233	4.1503
	233.2	4.83875	233.2	-3.401			233.2	18.4936	233.2	5.06583
	233.4	6.66985	233.4	-2.7906			233.4	17.2729	233.4	3.84513
	233.6	6.05954	233.6	-2.48538			233.6	15.747	233.6	-0.427332
	233.8	6.66994	233.8	-4.01122			233.8	19.7143	233.8	-0.122157
	234	6.66998	234	-5.23188			234	16.0522	234	1.7089
	234.2	5.44931	234.2	-6.14737			234.2	11.4745	234.2	-1.03768
	234.4	4.839	234.4	-3.70592			234.4	16.9677	234.4	0.488195
	234.6	1.78728	234.6	-0.65413			234.6	20.0194	234.6	2.01407
	234.8	1.78731	234.8	-0.0437447			234.8	19.1039	234.8	0.488195
	235	2.39769	235	-0.348888			235	18.4936	235	3.53995
	235.2	5.44948	235.2	-3.70579			235.2	14.8315	235.2	3.53995
	235.4	3.61846	235.4	-3.40058			235.4	18.4936	235.4	2.31925
	235.6	3.31331	235.6	-5.53679			235.6	15.1366	235.6	-0.732508
	235.8	0.566756	235.8	-2.79018			235.8	17.578	235.8	1.40372
	236	2.70301	236	-2.1798			236	17.578	236	3.84513
	236.2	3.61856	236.2	-0.653896			236.2	19.1039	236.2	1.7089
	236.4	3.31341	236.4	-1.26422			236.4	16.6625	236.4	3.23478
	236.6	0.261677	236.6	1.1772			236.6	17.2729	236.6	2.31925
	236.8	2.09275	236.8	-2.48488			236.8	16.9677	236.8	1.40372
	237	1.7876	237	-4.01074			237	17.8832	237	0.488195
	237.2	2.70315	237.2	-2.48484			237.2	15.1366	237.2	3.53995
	237.4	0.87211	237.4	-3.09517			237.4	14.5263	237.4	3.23478
	237.6	2.70318	237.6	-2.78998			237.6	15.747	237.6	5.67618
	237.8	2.09285	237.8	-1.87444			237.8	17.578	237.8	2.9296
	238	2.70322	238	-1.87442			238	19.7143	238	1.7089
	238.2	2.70323	238.2	-2.17958			238.2	15.4418	238.2	4.45548
	238.4	5.75501	238.4	-4.62097			238.4	16.0522	238.4	5.06583
	238.6	5.44984	238.6	-7.06236			238.6	16.6625	238.6	2.01407
	238.8	4.22915	238.8	-7.97788			238.8	21.2401	238.8	6.28653
	239	-1.264	239	-7.06234			239	17.8832	239	2.01407
	239.2	-0.0432802	239.2	-3.09504			239.2	14.2211	239.2	3.23478
	239.4	-1.56915	239.4	-3.70538			239.4	15.747	239.4	6.89689
	239.6	-1.56914	239.6	-6.75712			239.6	18.4936	239.6	3.53995
	239.8	-0.958773	239.8	-2.78983			239.8	15.1366	239.8	7.20206
	240	3.00852	240	-4.3157			240	15.1366	240	3.23478
	240.2	4.53441	240.2	-4.62086			240.2	15.4418	240.2	4.76066
	240.4	3.61889	240.4	-6.14673			240.4	17.2729	240.4	4.45548
	240.6	2.09302	240.6	-3.40014			240.6	16.6625	240.6	3.84513
	240.8	2.39821	240.8	-2.17943			240.8	13.0004	240.8	1.7089
	241	2.09304	241	-1.26389			241	15.1366	241	4.76066
	241.2	3.31375	241.2	-0.043181			241.2	16.6625	241.2	4.45548
	241.4	4.53446	241.4	-2.78976			241.4	16.6625	241.4	5.06583
	241.6	4.22929	241.6	-4.31563			241.6	14.8315	241.6	4.1503
	241.8	1.17754	241.8	-3.40009			241.8	19.1039	241.8	7.50724
	242	1.17755	242	-5.53632			242	15.1366	242	6.59171
	242.2	3.00861	242.2	-4.62078			242.2	16.3573	242.2	5.67618
	242.4	1.78791	242.4	-5.5363			242.4	17.578	242.4	4.76066
	242.6	-0.653485	242.6	-5.5363			242.6	14.8315	242.6	8.11759
	242.8	-0.65348	242.8	-3.70524			242.8	14.2211	242.8	4.76066
	243	3.61899	243	-3.40006			243	16.9677	243	5.98136
	243.2	3.92417	243.2	-4.31558			243.2	17.8832	243.2	7.20206
	243.4	4.53452	243.4	-5.53628			243.4	15.1366	243.4	4.1503
	243.6	5.14488	243.6	-3.09487			243.6	13.3056	243.6	3.84513
	243.8	6.67076	243.8	-1.87416			243.8	15.747	243.8	4.1503
	244	5.14489	244	-1.56898			244	17.8832	244	5.37101
	244.2	5.45007	244.2	-3.40003			244.2	17.2729	244.2	4.1503
	244.4	2.70349	244.4	-4.01038			244.4	12.6952	244.4	3.84513
	244.6	1.17762	244.6	-4.9259			244.6	13.6108	244.6	3.23478
	244.8	2.7035	244.8	-5.84142			244.8	15.4418	244.8	8.42276
	245	4.53456	245	-6.75695			245	17.2729	245	5.67618
	245.2	2.39833	245.2	-3.70519			245.2	15.1366	245.2	5.98136
	245.4	4.22939	245.4	-2.1793			245.4	15.4418	245.4	5.67618
	245.6	2.09316	245.6	-4.92588			245.6	13.0004	245.6	2.31925
	245.8	4.22939	245.8	-5.23106			245.8	16.6625	245.8	4.76066
	246	4.22939	246	-4.6207			246	16.6625	246	5.37101
	246.2	5.75528	246.2	-6.75693			246.2	14.8315	246.2	2.01407
	246.4	6.06045	246.4	-6.45175			246.4	15.1366	246.4	4.45548
	246.6	4.83975	246.6	-3.39999			246.6	14.5263	246.6	6.28653
	246.8	4.53458	246.8	-2.48446			246.8	16.9677	246.8	3.53995
	247	2.39835	247	-2.17928			247	14.2211	247	3.84513
	247.2	0.5673	247.2	-0.043052			247.2	17.2729	247.2	0.793371
	247.4	3.00871	247.4	-0.348226			247.4	19.4091	247.4	3.84513
	247.6	2.70353	247.6	-0.348224			247.6	17.2729	247.6	3.53995
	247.8	3.31389	247.8	-5.53621			247.8	15.1366	247.8	6.89689
	248	2.39836	248	-5.53621			248	16.0522	248	5.67618
	248.2	1.48284	248.2	-4.01033			248.2	15.1366	248.2	6.28653
	248.4	3.92424	248.4	-0.653393			248.4	19.1039	248.4	4.76066
	248.6	4.5346	248.6	-2.78962			248.6	15.1366	248.6	0.793371
	248.8	3.61907	248.8	-1.87409			248.8	13.3056	248.8	4.76066
	249	2.39837	249	-2.78962			249	19.1039	249	4.1503
	249.2	3.92425	249.2	-5.84138			249.2	16.9677	249.2	0.183019
	249.4	3.92425	249.4	-6.14655			249.4	17.2729	249.4	-1.34286
	249.6	4.83978	249.6	-2.48444			249.6	14.2211	249.6	2.9296
	249.8	4.83978	249.8	2.39837			249.8	16.6625	249.8	5.67618
	250	2.0932	250	-1.87409			250	16.6625	250	6.28653
	250.2	1.48285	250.2	-3.70514			250.2	16.6625	250.2	3.84513
	250.4	5.45013	250.4	-5.23102			250.4	16.3573	250.4	2.9296
	250.6	3.92426	250.6	-4.31549			250.6	18.4936	250.6	1.09855
	250.8	4.53461	250.8	-4.01031			250.8	19.4091	250.8	3.53995
	251	3.92426	251	-4.31549			251	15.1366	251	4.1503
	251.2	7.28119	251.2	-1.26373			251.2	17.8832	251.2	2.62443
	251.4	4.53461	251.4	0.567327			251.4	15.747	251.4	1.09855
	251.6	5.45014	251.6	0.872504			251.6	17.578	251.6	0.488195
	251.8	2.70356	251.8	-0.95855			251.8	17.578	251.8	2.01407
	252	3.61909	252	-3.70513			252	17.578	252	2.01407
	252.2	3.31391	252.2	-2.17925			252.2	12.6952	252.2	2.9296
	252.4	5.14497	252.4	-0.653373			252.4	17.2729	252.4	3.84513
	252.6	4.83979	252.6	1.78803			252.6	18.4936	252.6	4.45548
	252.8	6.97602	252.8	-2.17925			252.8	17.2729	252.8	3.84513
	253	6.36567	253	-4.0103			253	16.0522	253	-0.122157
	253.2	6.97602	253.2	-4.62066			253.2	17.8832	253.2	1.09855
	253.4	6.0605	253.4	-1.87407			253.4	18.1884	253.4	3.23478
	253.6	5.45015	253.6	0.262158			253.6	16.9677	253.6	6.28653
	253.8	3.61909	253.8	-3.39995			253.8	15.747	253.8	3.84513
	254	3.31392	254	-1.87407			254	16.3573	254	3.53995
	254.2	-0.958544	254.2	-0.958544			254.2	17.8832	254.2	5.37101
	254.4	0.872511	254.4	-2.17925			254.4	19.1039	254.4	4.1503
	254.6	4.53462	254.6	-4.92583			254.6	17.578	254.6	7.50724
	254.8	2.09322	254.8	0.567336			254.8	19.7143	254.8	2.31925
	255	2.39839	255	0.567337			255	15.747	255	3.23478
	255.2	6.97603	255.2	-5.84135			255.2	16.3573	255.2	4.1503
	255.4	4.22945	255.4	-8.28276			255.4	16.9677	255.4	3.23478
	255.6	2.09322	255.6	-4.31547			255.6	14.8315	255.6	4.76066
	255.8	1.17769	255.8	-1.56889			255.8	15.747	255.8	6.28653
	256	2.09322	256	-1.87407			256	16.6625	256	2.62443
	256.2	1.78804	256.2	-0.95854			256.2	19.1039	256.2	2.62443
	256.4	1.78804	256.4	-0.95854			256.4	16.3573	256.4	4.1503
	256.6	0.567339	256.6	-0.95854			256.6	13.9159	256.6	6.59171
	256.8	3.92427	256.8	-1.56889			256.8	15.4418	256.8	5.98136
	257	2.39839	257	-5.231			257	14.8315	257	4.76066
	257.2	5.45015	257.2	-7.06205			257.2	17.2729	257.2	7.20206
	257.4	3.92427	257.4	-4.31547			257.4	16.6625	257.4	4.76066
	257.6	3.92427	257.6	-2.78959			257.6	16.6625	257.6	4.45548
	257.8	-0.0430112	257.8	-4.31547			257.8	15.747	257.8	2.62443
	258	0.262165	258	-2.48442			258	17.578	258	4.76066
	258.2	4.22945	258.2	0.567341			258.2	16.6625	258.2	5.06583
	258.4	3.92427	258.4	-0.958538			258.4	16.9677	258.4	2.62443
	258.6	3.31392	258.6	-0.0430106			258.6	13.9159	258.6	5.06583
	258.8	0.872517	258.8	-1.56889			258.8	14.5263	258.8	5.06583
	259	-0.653362	259	-5.84135			259	14.2211	259	5.37101
	259.2	-0.653362	259.2	-5.84135			259.2	16.6625	259.2	3.53995
	259.4	3.00875	259.4	-6.4517			259.4	16.6625	259.4	5.67618
	259.6	5.14498	259.6	-5.231			259.6	17.2729	259.6	2.31925
	259.8	3.92428	259.8	-3.70512			259.8	13.9159	259.8	7.20206
	260	3.00875	260	-0.958537			260	16.6625	260	5.67618
	260.2	3.6191	260.2	-1.26371			260.2	13.9159	260.2	6.89689
	260.4	3.6191	260.4	-1.87406			260.4	15.747	260.4	3.53995
	260.6	5.14498	260.6	-3.39994			260.6	14.8315	260.6	5.98136
	260.8	5.14498	260.8	-3.09477			260.8	14.2211	260.8	2.9296
	261	2.3984	261	-4.01029			261	15.747	261	3.84513
	261.2	5.14498	261.2	-2.78959			261.2	14.2211	261.2	4.1503
	261.4	3.00875	261.4	-2.78959			261.4	9.94864	261.4	5.98136
	261.6	5.14498	261.6	-2.17924			261.6	15.4418	261.6	5.06583
	261.8	5.45016	261.8	-2.48441			261.8	18.4936	261.8	4.45548
	262	4.22945	262	-1.87406			262	18.4936	262	2.9296
	262.2	6.67086	262.2	-1.87406			262.2	16.9677	262.2	4.76066
	262.4	5.14498	262.4	-3.70512			262.4	13.3056	262.4	3.84513
	262.6	2.09322	262.6	-4.01029			262.6	14.5263	262.6	-1.03768
	262.8	2.09322	262.8	-4.62064			262.8	16.0522	262.8	3.53995
	263	3.31393	263	-5.84135			263	16.9677	263	2.9296
	263.2	1.78805	263.2	-6.75688			263.2	16.3573	263.2	1.09855
	263.4	1.78805	263.4	-2.17924			263.4	14.5263	263.4	5.37101
	263.6	5.75533	263.6	-1.26371			263.6	15.747	263.6	3.84513
	263.8	5.75533	263.8	-3.39994			263.8	16.6625	263.8	5.98136
	264	2.70357	264	-2.78959			264	13.9159	264	6.59171
	264.2	2.70357	264.2	-2.17924			264.2	15.747	264.2	3.53995
	264.4	5.14498	264.4	-1.87406			264.4	18.1884	264.4	4.76066
	264.6	5.14498	264.6	1.1777			264.6	18.1884	264.6	3.84513
	264.8	3.31393	264.8	-0.043008			264.8	16.0522	264.8	3.23478
	265	4.53463	265	-2.17924			265	18.1884	265	7.81241
	265.2	3.00875	265.2	-3.39994			265.2	15.747	265.2	7.50724
	265.4	7.28121	265.4	-3.39994			265.4	15.4418	265.4	5.37101
	265.6	6.36568	265.6	0.872519			265.6	13.3056	265.6	6.89689
	265.8	3.31393	265.8	-0.653359			265.8	16.3573	265.8	5.06583
	266	2.09322	266	-5.231			266	18.7987	266	5.67618
	266.2	3.31393	266.2	-3.70512			266.2	16.3573	266.2	4.45548
	266.4	5.14498	266.4	-1.26371			266.4	15.4418	266.4	3.84513
	266.6	4.22945	266.6	-0.348183			266.6	17.8832	266.6	9.64347
	266.8	6.36568	266.8	-5.84135			266.8	17.2729	266.8	5.06583
	267	5.75533	267	-2.48441			267	15.747	267	4.45548
	267.2	7.28121	267.2	-0.653359			267.2	15.4418	267.2	5.37101
	267.4	4.53463	267.4	0.87252			267.4	15.1366	267.4	3.23478
	267.6	2.3984	267.6	-0.958535			267.6	17.578	267.6	4.1503
	267.8	5.14498	267.8	-0.653359			267.8	15.4418	267.8	6.28653
	268	3.00875	268	-1.26371			268	16.0522	268	5.06583
	268.2	3.6191	268.2	2.3984			268.2	15.1366	268.2	3.84513
	268.4	4.8398	268.4	2.09322			268.4	16.6625	268.4	4.76066
	268.6	4.22945	268.6	-0.958535			268.6	19.1039	268.6	6.28653
	268.8	2.70357	268.8	-3.09477			268.8	18.7987	268.8	1.40372
	269	5.45016	269	-4.31547			269	15.1366	269	3.53995
	269.2	6.06051	269.2	-6.14652			269.2	14.2211	269.2	5.67618
	269.4	7.58639	269.4	-1.87406			269.4	13.3056	269.4	4.76066
	269.6	4.22945	269.6	2.09322			269.6	14.2211	269.6	4.45548
	269.8	2.70357	269.8	-0.348183			269.8	15.4418	269.8	3.84513
	270	3.00875	270	-0.0430074			270	14.8315	270	2.01407
	270.2	4.22945	270.2	-2.78959			270.2	15.4418	270.2	2.62443
	270.4	4.22945	270.4	-3.70512			270.4	15.747	270.4	5.06583
	270.6	3.00875	270.6	0.262168			270.6	17.578	270.6	6.28653
	270.8	2.3984	270.8	0.567344			270.8	12.6952	270.8	6.89689
	271	3.31393	271	-6.4517			271	16.9677	271	1.40372
	271.2	1.1777	271.2	-9.80863			271.2	18.7987	271.2	2.62443
	271.4	3.31393	271.4	-5.84135			271.4	17.578	271.4	5.06583
	271.6	0.567344	271.6	-2.48441			271.6	17.8832	271.6	4.76066
	271.8	0.262168	271.8	-7.6724			271.8	19.1039	271.8	1.09855
	272	3.00875	272	-3.70512			272	13.3056	272	3.84513
	272.2	2.70357	272.2	-6.4517			272.2	16.9677	272.2	6.28653
	272.4	3.6191	272.4	-3.39994			272.4	16.6625	272.4	5.67618
	272.6	1.1777	272.6	-3.39994			272.6	15.4418	272.6	5.06583
	272.8	-0.0430073	272.8	-1.26371			272.8	15.4418	272.8	4.76066
	273	1.48287	273	-3.39994			273	16.6625	273	3.53995
	273.2	1.48287	273.2	-2.78959			273.2	12.6952	273.2	5.98136
	273.4	-0.0430073	273.4	-3.70512			273.4	17.2729	273.4	7.81241
	273.6	1.1777	273.6	-5.53617			273.6	15.747	273.6	3.23478
	273.8	3.31393	273.8	-3.39994			273.8	16.0522	273.8	3.84513
	274	3.31393	274	-4.31547			274	12.6952	274	3.53995
	274.2	4.22945	274.2	-5.84135			274.2	17.8832	274.2	4.1503
	274.4	3.00875	274.4	-4.62064			274.4	16.9677	274.4	8.11759
	274.6	2.70357	274.6	-4.31547			274.6	13.0004	274.6	6.59171
	274.8	4.22945	274.8	-4.62064			274.8	16.6625	274.8	2.01407
	275	7.58639	275	-5.53617			275	16.0522	275	6.59171
	275.2	5.45016	275.2	-7.36723			275.2	13.3056	275.2	5.98136
	275.4	-0.348183	275.4	-5.53617			275.4	13.9159	275.4	5.98136
	275.6	-0.958535	275.6	-1.26371			275.6	18.1884	275.6	5.98136
	275.8	0.262169	275.8	0.262169			275.8	13.9159	275.8	5.06583
	276	0.87252	276	-3.70512			276	15.747	276	5.06583
	276.2	2.70357	276.2	-7.06205			276.2	13.9159	276.2	3.53995
	276.4	-1.87406	276.4	-2.48441			276.4	15.747	276.4	4.1503
	276.6	3.31393	276.6	-2.17924			276.6	15.747	276.6	4.76066
	276.8	5.45016	276.8	-3.09476			276.8	15.747	276.8	3.53995
	277	3.31393	277	-2.78959			277	13.6108	277	3.53995
	277.2	3.00875	277.2	-4.31547			277.2	11.7797	277.2	4.1503
	277.4	-1.56889	277.4	-5.84135			277.4	15.1366	277.4	4.76066
	277.6	-5.53617	277.6	-5.53617			277.6	15.747	277.6	2.9296
	277.8	0.567344	277.8	-3.09476			277.8	11.7797	277.8	2.9296
	278	5.75533	278	-1.56889			278	12.39	278	8.72794
	278.2	6.06051	278.2	-5.231			278.2	12.0849	278.2	7.81241
	278.4	4.83981	278.4	-1.87406			278.4	14.8315	278.4	4.76066
	278.6	4.53463	278.6	-1.87406			278.6	13.6108	278.6	4.1503
	278.8	3.00875	278.8	-1.87406			278.8	12.0849	278.8	5.37101
	279	3.00875	279	-4.01029			279	13.0004	279	6.89689
	279.2	4.83981	279.2	-3.39994			279.2	13.3056	279.2	5.06583
	279.4	4.22945	279.4	-1.87406			279.4	14.5263	279.4	3.84513
	279.6	3.6191	279.6	-0.958534			279.6	14.8315	279.6	3.53995
	279.8	3.00875	279.8	-1.26371			279.8	15.1366	279.8	4.1503
	280	1.78805	280	-3.39994			280	16.6625	280	3.23478
	280.2	0.87252	280.2	-0.348183			280.2	15.1366	280.2	5.37101
	280.4	1.78805	280.4	-1.56889			280.4	12.0849	280.4	7.20206
	280.6	5.75533	280.6	-2.78959			280.6	12.6952	280.6	3.23478
	280.8	7.28121	280.8	-4.92582			280.8	11.4745	280.8	2.31925
	281	5.45016	281	-6.4517			281	16.6625	281	2.31925
	281.2	3.31393	281.2	-5.231			281.2	16.3573	281.2	1.09855
	281.4	4.83981	281.4	-4.92582			281.4	15.1366	281.4	4.1503
	281.6	7.28121	281.6	-3.09476			281.6	12.0849	281.6	4.76066
	281.8	5.75533	281.8	-1.26371			281.8	15.1366	281.8	-0.732508
	282	4.22945	282	-4.62064			282	14.2211	282	5.06583
	282.2	0.567344	282.2	-3.70512			282.2	13.9159	282.2	6.28653
	282.4	1.1777	282.4	-1.56889			282.4	14.2211	282.4	5.67618
	282.6	4.53463	282.6	-4.31547			282.6	16.0522	282.6	3.84513
	282.8	5.45016	282.8	-4.62064			282.8	15.1366	282.8	3.53995
	283	3.6191	283	-2.17924			283	14.2211	283	5.37101
	283.2	2.70357	283.2	-2.48441			283.2	17.2729	283.2	3.23478
	283.4	3.92428	283.4	-4.92582			283.4	13.9159	283.4	-0.427332
	283.6	6.06051	283.6	-5.53617			283.6	13.9159	283.6	4.76066
	283.8	3.31393	283.8	-2.17924			283.8	17.8832	283.8	8.42276
	284	3.6191	284	-4.62064			284	13.9159	284	-0.122157
	284.2	3.6191	284.2	-1.56889			284.2	12.0849	284.2	4.1503
	284.4	5.45016	284.4	0.262169			284.4	16.6625	284.4	4.76066
	284.6	6.36568	284.6	-0.348183			284.6	16.0522	284.6	6.89689
	284.8	4.22945	284.8	-3.39994			284.8	14.8315	284.8	4.1503
	285	6.67086	285	-6.4517			285	15.747	285	1.7089
	285.2	7.89156	285.2	-6.14652			285.2	17.2729	285.2	0.793371
	285.4	6.06051	285.4	-5.231			285.4	14.8315	285.4	2.9296
	285.6	6.06051	285.6	-1.87406			285.6	17.8832	285.6	7.81241
	285.8	2.09322	285.8	-2.78959			285.8	17.2729	285.8	2.9296
	286	2.09322	286	-0.0430071			286	16.0522	286	2.01407
	286.2	3.92428	286.2	-2.17924			286.2	14.2211	286.2	4.45548
	286.4	4.83981	286.4	-3.70512			286.4	15.4418	286.4	4.1503
	286.6	7.28121	286.6	-0.653359			286.6	14.8315	286.6	4.1503
	286.8	6.67086	286.8	-0.348183			286.8	16.6625	286.8	4.1503
	287	1.78805	287	-0.958534			287	15.747	287	6.59171
	287.2	4.22945	287.2	2.3984			287.2	14.8315	287.2	3.23478
	287.4	5.14498	287.4	-0.958534			287.4	13.6108	287.4	3.23478
	287.6	0.87252	287.6	-1.56889			287.6	16.0522	287.6	2.01407
	287.8	-0.348183	287.8	-4.01029			287.8	16.9677	287.8	2.31925
	288	1.1777	288	-6.75687			288	16.9677	288	2.62443
	288.2	1.48287	288.2	-8.8931			288.2	16.0522	288.2	3.84513
	288.4	2.3984	288.4	-7.97758			288.4	19.7143	288.4	4.1503
	288.6	2.70357	288.6	-6.14652			288.6	13.6108	288.6	3.23478
	288.8	1.48287	288.8	-5.231			288.8	14.8315	288.8	5.67618
	289	2.70357	289	-7.36723			289	18.7987	289	1.40372
	289.2	3.31393	289.2	-7.6724			289.2	15.4418	289.2	5.67618
	289.4	-0.0430071	289.4	-6.14652			289.4	16.3573	289.4	4.76066
	289.6	1.78805	289.6	-4.01029			289.6	18.4936	289.6	3.23478
	289.8	4.53463	289.8	-3.70512			289.8	15.4418	289.8	2.31925
	290	3.92428	290	-3.70512			290	14.8315	290	5.06583
	290.2	2.3984	290.2	-3.09476			290.2	14.2211	290.2	5.67618
	290.4	1.48287	290.4	-4.31547			290.4	15.1366	290.4	4.45548
	290.6	2.70357	290.6	-2.17924			290.6	15.747	290.6	2.9296
	290.8	1.1777	290.8	-1.56889			290.8	15.4418	290.8	4.76066
	291	0.87252	291	-4.92582			291	15.747	291	5.98136
	291.2	2.70357	291.2	-3.70512			291.2	16.9677	291.2	5.37101
	291.4	2.3984	291.4	0.262169			291.4	14.5263	291.4	3.84513
	291.6	3.00875	291.6	-4.62064			291.6	15.4418	291.6	4.1503
	291.8	3.00875	291.8	-4.31547			291.8	15.4418	291.8	5.98136
	292	4.22945	292	-4.31547			292	18.4936	292	5.37101
	292.2	3.92428	292.2	-0.348183			292.2	14.5263	292.2	3.23478
	292.4	2.70357	292.4	0.567344			292.4	14.5263	292.4	4.45548
	292.6	5.14498	292.6	-1.26371			292.6	13.9159	292.6	5.37101
	292.8	4.53463	292.8	-4.62064			292.8	16.3573	292.8	3.84513
	293	2.70357	293	-3.70512			293	17.8832	293	3.53995
	293.2	1.78805	293.2	-0.653359			293.2	15.747	293.2	1.7089
	293.4	4.53463	293.4	0.567344			293.4	15.747	293.4	4.45548
	293.6	4.53463	293.6	-0.653359			293.6	14.2211	293.6	3.53995
	293.8	4.83981	293.8	-3.09476			293.8	14.5263	293.8	5.98136
	294	4.83981	294	-0.348183			294	16.3573	294	6.89689
	294.2	4.83981	294.2	-1.87406			294.2	16.0522	294.2	5.06583
	294.4	4.53463	294.4	-2.78959			294.4	16.9677	294.4	3.84513
	294.6	3.00875	294.6	-1.87406			294.6	17.578	294.6	1.40372
	294.8	3.6191	294.8	-1.26371			294.8	12.6952	294.8	2.62443
	295	0.87252	295	-1.26371			295	12.6952	295	3.84513
	295.2	0.87252	295.2	-1.56889			295.2	12.6952	295.2	5.37101
	295.4	3.92428	295.4	-2.17924			295.4	15.747	295.4	5.37101
	295.6	3.92428	295.6	0.262169			295.6	13.9159	295.6	4.45548
	295.8	2.70357	295.8	1.78805			295.8	13.6108	295.8	2.9296
	296	3.00875	296	-2.78959			296	12.39	296	3.84513
	296.2	2.09322	296.2	-4.62064			296.2	10.559	296.2	5.06583
	296.4	0.87252	296.4	-3.39994			296.4	15.747	296.4	3.53995
	296.6	0.567344	296.6	-3.09476			296.6	16.3573	296.6	7.81241
	296.8	3.00875	296.8	-4.31547			296.8	14.2211	296.8	5.06583
	297	3.6191	297	-1.87406			297	14.2211	297	2.62443
	297.2	6.06051	297.2	-1.56889			297.2	15.747	297.2	3.53995
	297.4	8.80709	297.4	-3.70512			297.4	14.2211	297.4	3.23478
	297.6	7.58639	297.6	-3.39994			297.6	15.1366	297.6	6.28653
	297.8	6.67086	297.8	-4.62064			297.8	16.3573	297.8	5.98136
	298	8.19674	298	-0.958534			298	14.8315	298	3.23478
	298.2	5.75533	298.2	-0.958534			298.2	13.9159	298.2	2.9296
	298.4	4.83981	298.4	0.262169			298.4	15.1366	298.4	5.67618
	298.6	5.14498	298.6	0.87252			298.6	16.9677	298.6	7.20206
	298.8	1.1777	298.8	1.1777			298.8	15.4418	298.8	4.45548
	299	4.53463	299	-0.348183			299	15.4418	299	0.488195
	299.2	2.3984	299.2	1.1777			299.2	12.39	299.2	1.09855
	299.4	3.92428	299.4	3.31393			299.4	14.8315	299.4	4.76066
	299.6	5.14498	299.6	2.09322			299.6	17.578	299.6	4.1503
	299.8	6.06051	299.8	0.567344			299.8	16.9677	299.8	4.76066
	300	3.6191	300	-3.70512			300	15.4418	300	5.98136
	300.2	1.48287	300.2	-0.0430071			300.2	14.2211	300.2	4.45548
	300.4	3.31393	300.4	-0.0430071			300.4	14.5263	300.4	5.37101
	300.6	5.75533	300.6	-0.0430071			300.6	12.0849	300.6	2.01407
	300.8	3.31393	300.8	-1.56889			300.8	13.6108	300.8	2.9296
	301	1.78805	301	-4.92582			301	14.8315	301	3.23478
	301.2	-0.0430071	301.2	-4.62064			301.2	16.0522	301.2	2.9296
	301.4	1.78805	301.4	-3.09476			301.4	18.1884	301.4	1.7089
	301.6	0.87252	301.6	-1.56889			301.6	16.3573	301.6	2.31925
	301.8	4.53463	301.8	0.87252			301.8	15.747	301.8	3.53995
	302	4.53463	302	3.92428			302	16.0522	302	5.06583
	302.2	3.6191	302.2	0.262169			302.2	16.6625	302.2	5.06583
	302.4	6.06051	302.4	-3.70512			302.4	18.7987	302.4	2.62443
	302.6	3.00875	302.6	-0.0430071			302.6	15.1366	302.6	0.488195
	302.8	2.09322	302.8	-1.56889			302.8	16.9677	302.8	2.01407
	303	3.31393	303	-3.09476			303	17.8832	303	5.98136
	303.2	-0.0430071	303.2	-6.14652			303.2	15.4418	303.2	5.67618
	303.4	-0.653359	303.4	-5.84135			303.4	14.8315	303.4	3.84513
	303.6	4.22945	303.6	-4.31547			303.6	16.0522	303.6	3.53995
	303.8	5.75533	303.8	-2.17924			303.8	16.0522	303.8	3.53995
	304	3.00875	304	0.262169			304	18.7987	304	5.06583
	304.2	1.48287	304.2	-1.26371			304.2	19.1039	304.2	5.98136
	304.4	4.53463	304.4	-5.84135			304.4	14.8315	304.4	0.793371
	304.6	2.70357	304.6	-7.97758			304.6	18.7987	304.6	-1.95321
	304.8	3.6191	304.8	-6.75687			304.8	17.8832	304.8	2.9296
	305	2.70357	305	-4.92582			305	13.9159	305	2.01407
	305.2	-0.348183	305.2	-4.62064			305.2	16.0522	305.2	2.01407
	305.4	3.31393	305.4	-5.84135			305.4	16.6625	305.4	2.31925
	305.6	0.567344	305.6	-5.231			305.6	14.2211	305.6	4.45548
	305.8	-0.348183	305.8	-6.14652			305.8	15.747	305.8	5.37101
	306	2.70357	306	-9.19828			306	15.747	306	1.7089
	306.2	0.87252	306.2	-8.58793			306.2	13.6108	306.2	2.31925
	306.4	3.31393	306.4	-5.84135			306.4	15.747	306.4	0.793371
	306.6	3.00875	306.6	-4.31547			306.6	12.0849	306.6	-0.732508
	306.8	4.22945	306.8	-1.26371			306.8	13.3056	306.8	2.62443
	307	4.53463	307	-2.17924			307	15.747	307	4.45548
	307.2	1.48287	307.2	-4.62064			307.2	14.5263	307.2	1.09855
	307.4	3.6191	307.4	-6.14652			307.4	13.6108	307.4	3.23478
	307.6	2.09322	307.6	-7.6724			307.6	17.8832	307.6	5.06583
	307.8	-0.653359	307.8	-4.01029			307.8	15.747	307.8	5.98136
	308	0.87252	308	-5.84135			308	15.1366	308	4.45548
	308.2	1.1777	308.2	-5.231			308.2	16.0522	308.2	2.62443
	308.4	2.09322	308.4	-7.06205			308.4	16.9677	308.4	3.53995
	308.6	1.78805	308.6	-2.48441			308.6	12.39	308.6	2.9296
	308.8	2.70357	308.8	-1.87406			308.8	13.6108	308.8	5.67618
	309	3.31393	309	-6.4517			309	16.6625	309	5.98136
	309.2	3.6191	309.2	-8.58793			309.2	15.4418	309.2	7.20206
	309.4	4.53463	309.4	-7.06205			309.4	16.9677	309.4	3.84513
	309.6	6.06051	309.6	-3.39994			309.6	18.1884	309.6	4.45548
	309.8	4.22945	309.8	-4.62064			309.8	13.0004	309.8	2.9296
	310	2.70357	310	-6.14652			310	13.6108	310	1.7089
	310.2	1.1777	310.2	-6.4517			310.2	14.8315	310.2	5.67618
	310.4	4.22945	310.4	-6.14652			310.4	13.6108	310.4	3.84513
	310.6	3.31393	310.6	-3.70512			310.6	17.8832	310.6	4.45548
	310.8	1.48287	310.8	-1.56889			310.8	16.0522	310.8	3.53995
	311	2.3984	311	-0.653359			311	14.2211	311	1.7089
	311.2	4.53463	311.2	-4.31547			311.2	15.4418	311.2	4.45548
	311.4	3.31393	311.4	-7.36723			311.4	16.9677	311.4	2.9296
	311.6	3.6191	311.6	-5.53617			311.6	14.8315	311.6	3.53995
	311.8	2.70357	311.8	-6.14652			311.8	18.1884	311.8	2.31925
	312	5.14498	312	-5.231			312	15.1366	312	7.20206
	312.2	2.70357	312.2	-4.31547			312.2	11.7797	312.2	5.98136
	312.4	3.92428	312.4	-1.87406			312.4	14.8315	312.4	4.45548
	312.6	2.70357	312.6	-1.56889			312.6	13.6108	312.6	6.28653
	312.8	2.70357	312.8	-3.39994			312.8	17.578	312.8	7.81241
	313	4.83981	313	-7.97758			313	13.9159	313	5.98136
	313.2	2.09322	313.2	-3.70512			313.2	16.3573	313.2	3.84513
	313.4	3.6191	313.4	-0.348183			313.4	14.8315	313.4	5.06583
	313.6	3.92428	313.6	-2.17924			313.6	16.3573	313.6	3.84513
	313.8	3.00875	313.8	-2.78959			313.8	11.7797	313.8	3.84513
	314	3.31393	314	-0.0430071			314	13.0004	314	3.23478
	314.2	5.45016	314.2	-0.653359			314.2	14.5263	314.2	3.53995
	314.4	6.67086	314.4	-4.62064			314.4	16.6625	314.4	1.40372
	314.6	4.53463	314.6	-6.75687			314.6	15.747	314.6	2.31925
	314.8	3.92428	314.8	-4.62064			314.8	14.5263	314.8	2.9296
	315	2.09322	315	-2.17924			315	14.5263	315	2.31925
	315.2	2.09322	315.2	-0.0430071			315.2	16.6625	315.2	4.1503
	315.4	7.58639	315.4	-1.26371			315.4	15.4418	315.4	3.84513
	315.6	8.80709	315.6	-1.56889			315.6	14.8315	315.6	6.89689
	315.8	5.14498	315.8	1.48287			315.8	16.9677	315.8	3.53995
	316	2.3984	316	-6.14652			316	16.6625	316	3.84513
	316.2	3.31393	316.2	-7.97758			316.2	15.1366	316.2	2.62443
	316.4	6.06051	316.4	-2.17924			316.4	16.0522	316.4	3.84513
	316.6	7.28121	316.6	-5.231			316.6	16.3573	316.6	4.1503
	316.8	6.97604	316.8	-4.62064			316.8	16.6625	316.8	4.1503
	317	3.92428	317	-1.87406			317	19.4091	317	2.31925
	317.2	4.83981	317.2	0.567344			317.2	16.0522	317.2	3.84513
	317.4	5.75533	317.4	-1.26371			317.4	13.6108	317.4	3.23478
	317.6	5.75533	317.6	-4.92582			317.6	19.1039	317.6	3.53995
	317.8	4.83981	317.8	-2.17924			317.8	15.4418	317.8	2.9296
	318	5.45016	318	-5.53617			318	18.1884	318	3.84513
	318.2	3.92428	318.2	-4.92582			318.2	18.4936	318.2	2.01407
	318.4	6.06051	318.4	-2.48441			318.4	16.9677	318.4	5.98136
	318.6	3.6191	318.6	-3.09476			318.6	17.578	318.6	2.01407
	318.8	1.78805	318.8	-2.17924			318.8	17.2729	318.8	2.62443
	319	2.09322	319	-3.39994			319	21.2401	319	2.9296
	319.2	2.70357	319.2	-0.958534			319.2	13.9159	319.2	1.40372
	319.4	3.92428	319.4	0.262169			319.4	13.3056	319.4	-0.427332
	319.6	5.14498	319.6	-4.62064			319.6	16.6625	319.6	3.23478
	319.8	3.31393	319.8	-6.75687			319.8	18.4936	319.8	2.62443
	320	1.48287	320	-4.31547			320	16.9677	320	3.53995
	320.2	3.00875	320.2	-3.09476			320.2	17.2729	320.2	2.01407
	320.4	5.45016	320.4	-4.31547			320.4	17.8832	320.4	5.37101
	320.6	5.45016	320.6	-2.48441			320.6	19.1039	320.6	3.23478
	320.8	2.09322	320.8	-1.87406			320.8	15.1366	320.8	2.01407
	321	2.70357	321	-0.653359			321	19.1039	321	-0.122157
	321.2	2.09322	321.2	-2.17924			321.2	19.4091	321.2	0.793371
	321.4	2.70357	321.4	-0.958534			321.4	18.7987	321.4	2.9296
	321.6	4.22945	321.6	-2.78959			321.6	18.4936	321.6	1.09855
	321.8	2.3984	321.8	-7.06205			321.8	16.0522	321.8	2.62443
	322	1.78805	322	-6.75687			322	13.9159	322	0.488195
	322.2	0.567344	322.2	-3.70512			322.2	15.747	322.2	3.84513
	322.4	-4.62064	322.4	-1.87406			322.4	19.7143	322.4	4.1503
	322.6	-3.70512	322.6	-1.26371			322.6	16.0522	322.6	5.98136
	322.8	1.78805	322.8	-3.09476			322.8	17.578	322.8	2.9296
	323	4.83981	323	-4.62064			323	16.9677	323	7.20206
	323.2	1.78805	323.2	-3.09476			323.2	13.9159	323.2	4.76066
	323.4	5.75533	323.4	-1.56889			323.4	17.578	323.4	2.31925
	323.6	3.6191	323.6	-4.92582			323.6	15.4418	323.6	3.23478
	323.8	0.87252	323.8	-5.53617			323.8	14.2211	323.8	7.50724
	324	2.70357	324	-7.97758			324	17.578	324	7.20206
	324.2	5.75533	324.2	-8.28275			324.2	15.747	324.2	6.89689
	324.4	5.14498	324.4	-7.6724			324.4	14.2211	324.4	4.1503
	324.6	2.70357	324.6	-5.53617			324.6	14.5263	324.6	5.06583
	324.8	0.262169	324.8	-4.31547			324.8	16.9677	324.8	5.37101
	325	1.1777	325	-6.75687			325	14.5263	325	3.53995
	325.2	2.09322	325.2	-3.39994			325.2	16.6625	325.2	4.1503
	325.4	4.83981	325.4	-3.39994			325.4	14.8315	325.4	5.06583
	325.6	2.3984	325.6	-3.70512			325.6	15.1366	325.6	3.84513
	325.8	1.48287	325.8	-4.31547			325.8	17.2729	325.8	3.23478
	326	0.567344	326	-3.70512			326	15.1366	326	2.01407
	326.2	-0.958534	326.2	-8.28275			326.2	15.1366	326.2	3.23478
	326.4	1.48287	326.4	-4.62064			326.4	14.2211	326.4	5.06583
	326.6	2.3984	326.6	-6.14652			326.6	15.4418	326.6	3.23478
	326.8	3.00875	326.8	-6.4517			326.8	14.2211	326.8	3.84513
	327	4.22945	327	-4.62064			327	12.6952	327	5.67618
	327.2	6.06051	327.2	-3.09476			327.2	16.3573	327.2	5.37101
	327.4	2.09322	327.4	-5.84135			327.4	14.2211	327.4	3.53995
	327.6	3.31393	327.6	-8.58793			327.6	13.3056	327.6	1.7089
	327.8	2.3984	327.8	-8.8931			327.8	15.747	327.8	1.40372
	328	4.53463	328	-7.97758			328	15.747	328	5.98136
	328.2	3.92428	328.2	-2.17924			328.2	13.9159	328.2	2.62443
	328.4	0.87252	328.4	-1.56889			328.4	14.8315	328.4	-0.122157
	328.6	0.87252	328.6	-2.78959			328.6	16.6625	328.6	2.9296
	328.8	4.22945	328.8	-3.70512			328.8	17.8832	328.8	5.06583
	329	2.70357	329	-2.17924			329	14.8315	329	2.01407
	329.2	3.00875	329.2	-1.26371			329.2	13.6108	329.2	5.37101
	329.4	6.06051	329.4	-1.87406			329.4	11.4745	329.4	6.59171
	329.6	5.45016	329.6	-0.348183			329.6	15.4418	329.6	1.40372
	329.8	8.80709	329.8	-2.48441			329.8	17.8832	329.8	3.53995
	330	5.75533	330	-4.31547			330	12.0849	330	4.45548
	330.2	2.3984	330.2	-1.56889			330.2	12.6952	330.2	3.84513
	330.4	0.87252	330.4	-2.48441			330.4	13.9159	330.4	5.06583
	330.6	-0.348183	330.6	-4.01029			330.6	14.5263	330.6	3.53995
	330.8	1.48287	330.8	-5.84135			330.8	16.6625	330.8	7.20206
	331	6.06051	331	-3.39994			331	16.9677	331	6.28653
	331.2	9.72262	331.2	-3.39994			331.2	16.6625	331.2	4.45548
	331.4	7.58639	331.4	-4.01029			331.4	16.3573	331.4	7.50724
	331.6	2.3984	331.6	-3.39994			331.6	13.9159	331.6	5.06583
	331.8	1.48287	331.8	-1.56889			331.8	18.1884	331.8	4.1503
	332	0.567344	332	-7.6724			332	16.3573	332	2.31925
	332.2	3.92428	332.2	-7.36723			332.2	13.0004	332.2	1.7089
	332.4	3.92428	332.4	-6.4517			332.4	15.4418	332.4	3.23478
	332.6	3.92428	332.6	-5.84135			332.6	14.8315	332.6	4.1503
	332.8	1.1777	332.8	-5.84135			332.8	16.6625	332.8	2.9296
	333	1.78805	333	-5.231			333	15.4418	333	7.50724
	333.2	-0.0430071	333.2	-3.70512			333.2	15.4418	333.2	5.67618
	333.4	2.09322	333.4	-5.231			333.4	16.9677	333.4	4.45548
	333.6	5.45016	333.6	-7.6724			333.6	17.578	333.6	3.84513
	333.8	8.80709	333.8	-6.4517			333.8	17.8832	333.8	2.9296
	334	6.06051	334	-5.53617			334	18.4936	334	2.31925
	334.2	5.45016	334.2	-2.17924			334.2	14.8315	334.2	2.9296
	334.4	5.75533	334.4	-2.17924			334.4	16.3573	334.4	-0.122157
	334.6	5.14498	334.6	-0.653359			334.6	16.6625	334.6	3.53995
	334.8	6.06051	334.8	-3.70512			334.8	14.2211	334.8	3.84513
	335	6.06051	335	-4.62064			335	15.1366	335	-0.732508
	335.2	1.1777	335.2	-3.70512			335.2	13.9159	335.2	4.45548
	335.4	-0.958534	335.4	-0.958534			335.4	17.578	335.4	0.793371
	335.6	2.3984	335.6	-1.87406			335.6	13.9159	335.6	-1.64804
	335.8	5.14498	335.8	-3.70512			335.8	14.5263	335.8	-1.03768
	336	3.6191	336	-0.348183			336	16.9677	336	4.45548
	336.2	2.3984	336.2	-3.70512			336.2	15.747	336.2	3.53995
	336.4	-3.09476	336.4	-1.26371			336.4	16.6625	336.4	2.01407
	336.6	0.87252	336.6	-0.0430071			336.6	14.2211	336.6	-1.03768
	336.8	2.70357	336.8	-5.231			336.8	16.6625	336.8	-0.427332
	337	5.75533	337	-7.06205			337	16.3573	337	2.62443
	337.2	5.75533	337.2	-8.58793			337.2	18.4936	337.2	2.9296
	337.4	3.92428	337.4	-7.97758			337.4	17.2729	337.4	4.45548
	337.6	1.78805	337.6	-5.84135			337.6	16.9677	337.6	1.7089
	337.8	6.06051	337.8	-4.01029			337.8	17.8832	337.8	1.09855
	338	3.6191	338	-3.09476			338	15.4418	338	2.9296
	338.2	3.92428	338.2	-0.958534			338.2	15.4418	338.2	1.7089
	338.4	3.31393	338.4	-5.231			338.4	18.1884	338.4	0.488195
	338.6	2.70357	338.6	-8.8931			338.6	20.3246	338.6	4.1503
	338.8	6.36568	338.8	-7.97758			338.8	19.7143	338.8	3.53995
	339	6.06051	339	-5.231			339	16.3573	339	1.40372
	339.2	5.45016	339.2	-3.70512			339.2	15.747	339.2	0.793371
	339.4	3.00875	339.4	-0.653359			339.4	17.8832	339.4	2.01407
	339.6	3.6191	339.6	-2.78959			339.6	18.1884	339.6	2.9296
	339.8	2.09322	339.8	-3.70512			339.8	16.3573	339.8	2.01407
	340	2.70357	340	-3.70512			340	16.3573	340	2.62443
	340.2	4.53463	340.2	-3.39994			340.2	14.2211	340.2	2.01407
	340.4	3.92428	340.4	-3.09476			340.4	17.578	340.4	4.45548
	340.6	6.67086	340.6	-4.01029			340.6	18.1884	340.6	3.84513
	340.8	3.92428	340.8	-4.31547			340.8	18.7987	340.8	2.9296
	341	2.70357	341	-5.84135			341	17.8832	341	-1.64804
	341.2	0.87252	341.2	-7.06205			341.2	18.1884	341.2	3.23478
	341.4	3.00875	341.4	-3.70512			341.4	12.6952	341.4	3.84513
	341.6	3.6191	341.6	-1.26371			341.6	15.1366	341.6	2.31925
	341.8	2.3984	341.8	-2.17924			341.8	15.1366	341.8	3.53995
	342	3.6191	342	-0.653359			342	16.0522	342	3.23478
	342.2	1.78805	342.2	-4.01029			342.2	15.1366	342.2	2.9296
	342.4	4.53463	342.4	-4.31547			342.4	15.1366	342.4	2.9296
	342.6	2.3984	342.6	-4.92582			342.6	18.4936	342.6	3.84513
	342.8	1.48287	342.8	-4.01029			342.8	18.1884	342.8	5.67618
	343	1.48287	343	-6.75687			343	15.1366	343	4.76066
	343.2	0.567344	343.2	-5.53617			343.2	13.6108	343.2	4.76066
	343.4	3.92428	343.4	-3.70512			343.4	15.747	343.4	2.9296
	343.6	2.09322	343.6	-3.39994			343.6	17.8832	343.6	1.7089
	343.8	1.78805	343.8	-4.92582			343.8	13.9159	343.8	2.01407
	344	3.00875	344	-3.70512			344	16.9677	344	5.98136
	344.2	4.53463	344.2	-2.48441			344.2	14.5263	344.2	2.31925
	344.4	4.22945	344.4	-4.62064			344.4	15.1366	344.4	4.1503
	344.6	6.36568	344.6	-1.56889			344.6	13.0004	344.6	3.53995
	344.8	3.92428	344.8	-1.87406			344.8	13.6108	344.8	3.53995
	345	7.58639	345	-0.958534			345	15.4418	345	4.1503
	345.2	8.19674	345.2	-4.62064			345.2	17.2729	345.2	2.62443
	345.4	5.75533	345.4	-1.26371			345.4	16.9677	345.4	5.06583
	345.6	3.92428	345.6	-0.348183			345.6	16.0522	345.6	5.98136
	345.8	5.14498	345.8	-4.01029			345.8	13.3056	345.8	5.06583
	346	3.31393	346	-5.231			346	13.0004	346	2.62443
	346.2	4.22945	346.2	-2.48441			346.2	17.2729	346.2	2.31925
	346.4	4.22945	346.4	-1.26371			346.4	18.7987	346.4	1.09855
	346.6	2.70357	346.6	-1.87406			346.6	16.6625	346.6	2.9296
	346.8	4.83981	346.8	-2.48441			346.8	14.2211	346.8	2.9296
	347	3.31393	347	-1.26371			347	13.6108	347	3.23478
	347.2	1.78805	347.2	-5.84135			347.2	15.747	347.2	1.09855
	347.4	5.75533	347.4	-4.31547			347.4	15.4418	347.4	3.23478
	347.6	3.31393	347.6	-4.31547			347.6	17.578	347.6	2.01407
	347.8	1.78805	347.8	-0.0430071			347.8	17.8832	347.8	-0.732508
	348	3.6191	348	-3.39994			348	15.747	348	2.31925
	348.2	6.06051	348.2	-3.09476			348.2	16.0522	348.2	1.40372
	348.4	2.3984	348.4	-0.958534			348.4	13.9159	348.4	2.62443
	348.6	3.6191	348.6	1.1777			348.6	13.3056	348.6	1.09855
	348.8	3.6191	348.8	-0.0430071			348.8	17.578	348.8	2.9296
	349	2.70357	349	3.00875			349	19.7143	349	3.23478
	349.2	0.567344	349.2	0.87252			349.2	15.4418	349.2	2.9296
	349.4	0.87252	349.4	-0.0430071			349.4	14.2211	349.4	1.09855
	349.6	1.78805	349.6	-1.87406			349.6	16.0522	349.6	-0.732508
	349.8	6.06051	349.8	-3.39994			349.8	18.4936	349.8	1.7089
	350	9.41744	350	-4.01029			350	15.1366	350	1.7089
	350.2	9.11227	350.2	-2.17924			350.2	16.3573	350.2	2.31925
	350.4	9.11227	350.4	-0.348183			350.4	17.578	350.4	2.62443
	350.6	8.50191	350.6	-2.78959			350.6	18.1884	350.6	0.793371
	350.8	5.45016	350.8	-5.84135			350.8	13.3056	350.8	1.40372
	351	3.00875	351	-5.84135			351	15.1366	351	-1.03768
	351.2	2.3984	351.2	1.48287			351.2	15.4418	351.2	4.1503
	351.4	1.78805	351.4	2.3984			351.4	16.3573	351.4	4.1503
	351.6	1.78805	351.6	-0.958534			351.6	19.1039	351.6	-1.95321
	351.8	1.78805	351.8	-2.17924			351.8	17.8832	351.8	-3.78427
	352	2.70357	352	0.87252			352	14.5263	352	1.7089
	352.2	3.31393	352.2	0.567344			352.2	17.8832	352.2	0.488195
	352.4	8.19674	352.4	-0.958534			352.4	15.747	352.4	-1.64804
	352.6	6.36568	352.6	2.3984			352.6	18.1884	352.6	0.793371
	352.8	2.3984	352.8	-2.17924			352.8	16.3573	352.8	0.793371
	353	4.83981	353	-1.26371			353	14.8315	353	1.40372
	353.2	6.36568	353.2	0.262169			353.2	16.9677	353.2	0.488195
	353.4	3.92428	353.4	-0.958534			353.4	17.578	353.4	-2.56356
	353.6	0.87252	353.6	-4.92582			353.6	19.7143	353.6	1.40372
	353.8	-2.17924	353.8	-1.26371			353.8	17.578	353.8	3.53995
	354	-1.26371	354	-5.53617			354	17.8832	354	2.31925
	354.2	0.262169	354.2	-4.92582			354.2	17.8832	354.2	2.9296
	354.4	3.00875	354.4	-3.09476			354.4	16.0522	354.4	1.7089
	354.6	2.3984	354.6	-2.17924			354.6	16.9677	354.6	0.488195
	354.8	-0.653359	354.8	-4.01029			354.8	14.2211	354.8	3.53995
	355	4.83981	355	-7.97758			355	16.0522	355	2.31925
	355.2	3.00875	355.2	-6.14652			355.2	18.1884	355.2	2.62443
	355.4	-1.26371	355.4	-5.53617			355.4	16.3573	355.4	0.183019
	355.6	2.3984	355.6	-1.56889			355.6	21.8505	355.6	0.488195
	355.8	0.567344	355.8	-5.231			355.8	18.7987	355.8	-0.732508
	356	2.3984	356	-3.09476			356	16.9677	356	-0.122157
	356.2	1.78805	356.2	-6.75687			356.2	16.0522	356.2	-2.56356
	356.4	5.14498	356.4	-6.75687			356.4	14.5263	356.4	1.40372
	356.6	5.14498	356.6	-1.87406			356.6	13.9159	356.6	3.23478
	356.8	5.75533	356.8	-3.09476			356.8	16.3573	356.8	-1.34286
	357	-0.653359	357	-4.62064			357	17.8832	357	2.31925
	357.2	0.262169	357.2	-3.39994			357.2	17.578	357.2	2.01407
	357.4	-0.0430071	357.4	-1.56889			357.4	15.4418	357.4	5.67618
	357.6	1.1777	357.6	0.262169			357.6	15.1366	357.6	3.53995
	357.8	5.14498	357.8	-3.39994			357.8	13.9159	357.8	3.23478
	358	3.92428	358	-0.958534			358	19.1039	358	2.62443
	358.2	6.36568	358.2	-4.31547			358.2	16.9677	358.2	5.37101
	358.4	3.6191	358.4	-2.78959			358.4	17.2729	358.4	3.23478
	358.6	4.53463	358.6	-2.78959			358.6	14.2211	358.6	3.84513
	358.8	5.14498	358.8	-1.87406			358.8	16.3573	358.8	5.37101
	359	3.31393	359	-3.39994			359	15.747	359	2.01407
	359.2	3.00875	359.2	-4.62064			359.2	16.3573	359.2	5.06583
	359.4	-0.0430071	359.4	-3.70512			359.4	19.7143	359.4	5.06583
	359.6	3.31393	359.6	-1.56889			359.6	17.2729	359.6	5.37101
	359.8	0.87252	359.8	-5.53617			359.8	15.1366	359.8	3.23478
	360	1.48287	360	-4.31547			360	14.2211	360	1.09855
	360.2	1.48287	360.2	-3.70512			360.2	18.4936	360.2	5.37101
	360.4	2.09322	360.4	-0.653359			360.4	15.4418	360.4	4.45548
	360.6	2.09322	360.6	-2.17924			360.6	15.1366	360.6	2.62443
	360.8	0.567344	360.8	-6.75687			360.8	13.3056	360.8	4.1503
	361	0.262169	361	-3.09476			361	16.6625	361	3.23478
	361.2	3.00875	361.2	-1.26371			361.2	18.7987	361.2	1.7089
	361.4	3.92428	361.4	-1.26371			361.4	14.8315	361.4	2.62443
	361.6	2.09322	361.6	-0.0430071			361.6	14.5263	361.6	3.53995
	361.8	-0.0430071	361.8	-0.348183			361.8	14.2211	361.8	3.23478
	362	1.78805	362	-0.348183			362	16.0522	362	1.09855
	362.2	1.78805	362.2	0.567344			362.2	14.5263	362.2	4.76066
	362.4	3.31393	362.4	2.09322			362.4	15.4418	362.4	2.31925
	362.6	6.06051	362.6	2.09322			362.6	16.3573	362.6	2.31925
	362.8	5.45016	362.8	-0.0430071			362.8	14.5263	362.8	3.23478
	363	5.45016	363	-2.78959			363	19.1039	363	2.62443
	363.2	6.97604	363.2	-2.78959			363.2	17.8832	363.2	-0.122157
	363.4	7.28121	363.4	-4.62064			363.4	15.4418	363.4	2.31925
	363.6	6.67086	363.6	-6.4517			363.6	13.6108	363.6	4.1503
	363.8	6.36568	363.8	-1.87406			363.8	16.0522	363.8	3.84513
	364	2.3984	364	-1.26371			364	17.2729	364	-0.732508
	364.2	2.3984	364.2	-4.01029			364.2	16.6625	364.2	-1.03768
	364.4	0.262169	364.4	-5.231			364.4	15.1366	364.4	1.40372
	364.6	1.48287	364.6	-3.70512			364.6	15.4418	364.6	3.23478
	364.8	4.53463	364.8	-2.78959			364.8	12.6952	364.8	3.23478
	365	5.75533	365	-4.01029			365	16.6625	365	2.01407
	365.2	4.83981	365.2	-0.958534			365.2	16.6625	365.2	4.1503
	365.4	2.09322	365.4	-0.0430071			365.4	18.1884	365.4	3.84513
	365.6	2.70357	365.6	-0.0430071			365.6	13.0004	365.6	2.01407
	365.8	3.31393	365.8	2.09322			365.8	14.2211	365.8	2.9296
	366	1.78805	366	0.567344			366	13.9159	366	2.01407
	366.2	1.1777	366.2	-4.92582			366.2	16.3573	366.2	3.53995
	366.4	1.48287	366.4	-7.97758			366.4	17.578	366.4	5.06583
	366.6	5.75533	366.6	-4.31547			366.6	18.4936	366.6	5.06583
	366.8	6.67086	366.8	-3.09476			366.8	20.6298	366.8	3.53995
	367	5.75533	367	-2.48441			367	18.7987	367	5.37101
	367.2	4.53463	367.2	-0.348183			367.2	16.6625	367.2	6.59171
	367.4	3.6191	367.4	1.48287			367.4	15.1366	367.4	7.81241
	367.6	7.28121	367.6	0.262169			367.6	16.0522	367.6	5.98136
	367.8	5.45016	367.8	-1.56889			367.8	17.2729	367.8	7.50724
	368	6.97604	368	-1.26371			368	19.1039	368	4.45548
	368.2	3.6191	368.2	-2.17924			368.2	19.1039	368.2	3.23478
	368.4	3.92428	368.4	-1.56889			368.4	20.6298	368.4	5.37101
	368.6	6.06051	368.6	-2.17924			368.6	15.4418	368.6	5.06583
	368.8	6.36568	368.8	-2.78959			368.8	15.1366	368.8	5.37101
	369	3.00875	369	-0.958534			369	16.0522	369	2.01407
	369.2	4.83981	369.2	-3.39994			369.2	16.9677	369.2	5.67618
	369.4	5.14498	369.4	-2.17924			369.4	17.2729	369.4	2.31925
	369.6	3.00875	369.6	-2.17924			369.6	17.2729	369.6	4.76066
	369.8	2.3984	369.8	-3.09476			369.8	17.2729	369.8	6.59171
	370	2.70357	370	-4.92582			370	16.6625	370	5.37101
	370.2	2.3984	370.2	-2.78959			370.2	18.7987	370.2	5.67618
	370.4	0.87252	370.4	-3.39994			370.4	16.6625	370.4	3.23478
	370.6	2.70357	370.6	-3.09476			370.6	16.3573	370.6	1.09855
	370.8	3.31393	370.8	-1.26371			370.8	19.4091	370.8	4.1503
	371	2.70357	371	-1.87406			371	19.7143	371	1.7089
	371.2	2.09322	371.2	-0.958534			371.2	16.6625	371.2	2.62443
	371.4	2.3984	371.4	-4.62064			371.4	16.9677	371.4	5.67618
	371.6	2.3984	371.6	-4.92582			371.6	18.4936	371.6	6.59171
	371.8	3.6191	371.8	-7.6724			371.8	15.4418	371.8	5.67618
	372	5.45016	372	-10.1138			372	16.0522	372	2.9296
	372.2	4.53463	372.2	-4.01029			372.2	15.747	372.2	5.06583
	372.4	3.00875	372.4	-6.14652			372.4	17.578	372.4	4.45548
	372.6	3.00875	372.6	-4.62064			372.6	16.9677	372.6	2.31925
	372.8	6.67086	372.8	-1.56889			372.8	18.7987	372.8	5.67618
	373	4.22945	373	-4.31547			373	14.8315	373	4.45548
	373.2	2.3984	373.2	-5.84135			373.2	16.3573	373.2	4.45548
	373.4	3.00875	373.4	-5.84135			373.4	13.9159	373.4	2.9296
	373.6	0.262169	373.6	-6.75687			373.6	15.4418	373.6	5.67618
	373.8	0.262169	373.8	-5.231			373.8	17.8832	373.8	3.53995
	374	-0.348183	374	0.262169			374	15.747	374	5.37101
	374.2	0.87252	374.2	3.6191			374.2	14.5263	374.2	3.84513
	374.4	-0.0430071	374.4	-3.39994			374.4	15.4418	374.4	4.76066
	374.6	1.78805	374.6	-3.70512			374.6	18.7987	374.6	6.59171
	374.8	3.31393	374.8	-1.56889			374.8	17.2729	374.8	6.28653
	375	1.48287	375	-1.87406			375	16.0522	375	2.9296
	375.2	0.567344	375.2	-4.62064			375.2	17.2729	375.2	3.23478
	375.4	1.1777	375.4	-6.14652			375.4	14.2211	375.4	4.76066
	375.6	-1.26371	375.6	-4.92582			375.6	18.7987	375.6	5.06583
	375.8	0.262169	375.8	-3.39994			375.8	16.0522	375.8	2.01407
	376	1.78805	376	-1.26371			376	13.0004	376	-0.122157
	376.2	3.00875	376.2	-2.17924			376.2	16.9677	376.2	0.793371
	376.4	-0.348183	376.4	-4.92582			376.4	17.578	376.4	2.9296
	376.6	3.6191	376.6	-6.75687			376.6	14.5263	376.6	2.62443
	376.8	2.09322	376.8	-4.62064			376.8	14.8315	376.8	4.76066
	377	1.78805	377	-4.62064			377	16.6625	377	-0.732508
	377.2	5.45016	377.2	-4.01029			377.2	15.4418	377.2	-0.732508
	377.4	7.28121	377.4	-5.231			377.4	15.747	377.4	-0.427332
	377.6	7.28121	377.6	-3.70512			377.6	16.6625	377.6	2.31925
	377.8	3.92428	377.8	-2.78959			377.8	14.5263	377.8	2.31925
	378	-0.348183	378	-3.70512			378	14.2211	378	3.53995
	378.2	4.53463	378.2	-0.653359			378.2	16.0522	378.2	3.23478
	378.4	1.1777	378.4	-1.87406			378.4	16.3573	378.4	2.01407
	378.6	2.70357	378.6	-4.31547			378.6	17.578	378.6	3.84513
	378.8	5.14498	378.8	-7.6724			378.8	14.8315	378.8	2.31925
	379	5.75533	379	-7.06205			379	13.9159	379	0.793371
	379.2	6.06051	379.2	-1.56889			379.2	17.2729	379.2	4.45548
	379.4	3.6191	379.4	-3.09476			379.4	16.9677	379.4	5.67618
	379.6	0.87252	379.6	-5.53617			379.6	17.8832	379.6	5.06583
	379.8	3.00875	379.8	-4.01029			379.8	15.4418	379.8	3.23478
	380	4.22945	380	-2.48441			380	17.8832	380	3.23478
	380.2	6.97604	380.2	0.262169			380.2	16.6625	380.2	2.62443
	380.4	3.92428	380.4	-1.87406			380.4	14.8315	380.4	3.23478
	380.6	2.70357	380.6	-5.231			380.6	13.6108	380.6	4.1503
	380.8	4.83981	380.8	-3.70512			380.8	15.1366	380.8	4.76066
	381	3.00875	381	-3.09476			381	15.4418	381	5.06583
	381.2	1.1777	381.2	-3.39994			381.2	15.4418	381.2	5.67618
	381.4	0.87252	381.4	-3.39994			381.4	14.2211	381.4	5.67618
	381.6	3.6191	381.6	-5.53617			381.6	16.9677	381.6	3.84513
	381.8	5.45016	381.8	-3.39994			381.8	15.747	381.8	3.53995
	382	3.31393	382	0.87252			382	16.3573	382	4.76066
	382.2	1.48287	382.2	-2.78959			382.2	17.2729	382.2	3.23478
	382.4	1.78805	382.4	-3.39994			382.4	13.6108	382.4	4.45548
	382.6	3.92428	382.6	-4.92582			382.6	17.2729	382.6	5.98136
	382.8	6.97604	382.8	-3.39994			382.8	15.4418	382.8	1.09855
	383	3.92428	383	-4.31547			383	14.5263	383	-1.03768
	383.2	4.22945	383.2	-1.26371			383.2	16.9677	383.2	2.62443
	383.4	6.06051	383.4	-3.70512			383.4	15.4418	383.4	2.9296
	383.6	6.67086	383.6	-5.231			383.6	14.8315	383.6	5.98136
	383.8	5.45016	383.8	-3.70512			383.8	11.1693	383.8	7.81241
	384	5.75533	384	-3.70512			384	15.4418	384	2.31925
	384.2	3.92428	384.2	-2.17924			384.2	16.0522	384.2	1.40372
	384.4	-0.653359	384.4	0.567344			384.4	16.9677	384.4	1.7089
	384.6	2.09322	384.6	0.567344			384.6	13.9159	384.6	3.84513
	384.8	5.45016	384.8	0.567344			384.8	14.5263	384.8	4.1503
	385	3.6191	385	-2.17924			385	15.1366	385	2.9296
	385.2	3.00875	385.2	-0.348183			385.2	13.0004	385.2	0.793371
	385.4	2.3984	385.4	-2.78959			385.4	20.0194	385.4	0.793371
	385.6	4.53463	385.6	-3.39994			385.6	17.2729	385.6	1.40372
	385.8	5.45016	385.8	-0.348183			385.8	15.1366	385.8	6.28653
	386	4.53463	386	1.1777			386	15.747	386	2.9296
	386.2	5.14498	386.2	-1.26371			386.2	16.6625	386.2	3.84513
	386.4	6.36568	386.4	-6.75687			386.4	16.9677	386.4	3.84513
	386.6	5.75533	386.6	-8.28275			386.6	19.1039	386.6	4.76066
	386.8	4.83981	386.8	-5.84135			386.8	17.2729	386.8	4.1503
	387	4.22945	387	-4.62064			387	14.2211	387	4.76066
	387.2	4.22945	387.2	-0.958534			387.2	13.0004	387.2	2.62443
	387.4	1.78805	387.4	-1.56889			387.4	16.3573	387.4	4.45548
	387.6	1.48287	387.6	-2.48441			387.6	17.2729	387.6	4.1503
	387.8	2.3984	387.8	-3.09476			387.8	16.0522	387.8	3.23478
	388	1.78805	388	-3.09476			388	13.0004	388	4.45548
	388.2	3.31393	388.2	-1.56889			388.2	13.9159	388.2	2.9296
	388.4	1.48287	388.4	1.48287			388.4	16.9677	388.4	3.53995
	388.6	-2.78959	388.6	-3.39994			388.6	16.0522	388.6	2.62443
	388.8	-0.653359	388.8	-2.48441			388.8	16.6625	388.8	1.40372
	389	-0.0430071	389	-0.348183			389	16.0522	389	3.84513
	389.2	0.567344	389.2	-4.01029			389.2	16.3573	389.2	2.01407
	389.4	0.87252	389.4	-3.70512			389.4	12.39	389.4	0.488195
	389.6	0.567344	389.6	-1.87406			389.6	15.4418	389.6	2.62443
	389.8	1.78805	389.8	-2.17924			389.8	18.4936	389.8	5.98136
	390	0.262169	390	-0.958534			390	17.2729	390	6.59171
	390.2	1.1777	390.2	-2.17924			390.2	16.9677	390.2	2.01407
	390.4	1.1777	390.4	-3.09476			390.4	16.0522	390.4	1.7089
	390.6	4.53463	390.6	-4.01029			390.6	13.3056	390.6	3.84513
	390.8	5.14498	390.8	-7.36723			390.8	14.5263	390.8	2.31925
	391	1.48287	391	-5.231			391	16.0522	391	2.01407
	391.2	-0.653359	391.2	-3.09476			391.2	17.8832	391.2	4.1503
	391.4	2.70357	391.4	-1.87406			391.4	14.8315	391.4	3.23478
	391.6	3.31393	391.6	-0.958534			391.6	15.4418	391.6	2.31925
	391.8	2.70357	391.8	-0.653359			391.8	18.7987	391.8	0.793371
	392	3.31393	392	-2.48441			392	12.6952	392	1.40372
	392.2	1.78805	392.2	-7.36723			392.2	13.9159	392.2	4.1503
	392.4	2.3984	392.4	-7.6724			392.4	17.578	392.4	5.37101
	392.6	3.92428	392.6	-3.70512			392.6	16.9677	392.6	4.1503
	392.8	3.00875	392.8	-2.48441			392.8	17.578	392.8	3.23478
	393	0.262169	393	-2.48441			393	16.0522	393	4.45548
	393.2	0.567344	393.2	-0.653359			393.2	17.2729	393.2	4.76066
	393.4	3.92428	393.4	-0.348183			393.4	17.578	393.4	6.28653
	393.6	3.00875	393.6	-2.17924			393.6	16.9677	393.6	6.89689
	393.8	1.48287	393.8	-1.56889			393.8	19.1039	393.8	2.01407
	394	3.31393	394	-0.348183			394	15.4418	394	4.76066
	394.2	3.6191	394.2	-2.78959			394.2	12.6952	394.2	3.84513
	394.4	4.83981	394.4	-3.09476			394.4	13.6108	394.4	4.76066
	394.6	4.22945	394.6	-4.92582			394.6	17.8832	394.6	2.62443
	394.8	4.83981	394.8	-3.39994			394.8	15.1366	394.8	1.40372
	395	4.22945	395	-2.48441			395	14.8315	395	4.45548
	395.2	5.14498	395.2	-1.87406			395.2	15.1366	395.2	5.37101
	395.4	4.83981	395.4	0.262169			395.4	16.3573	395.4	9.33829
	395.6	1.78805	395.6	-3.39994			395.6	16.0522	395.6	2.31925
	395.8	3.31393	395.8	-7.06205			395.8	16.0522	395.8	2.01407
	396	3.31393	396	-8.58793			396	12.39	396	3.53995
	396.2	6.36568	396.2	-5.231			396.2	15.747	396.2	1.40372
	396.4	5.45016	396.4	-4.01029			396.4	16.6625	396.4	2.9296
	396.6	5.75533	396.6	0.567344			396.6	14.8315	396.6	7.20206
	396.8	0.504644	396.8	-6.81957			396.8	1.81163	396.8	-9.78505
	397	876.85	397	787.128			397	-963.49	397	-1347.1
	397.2	119.616	397.2	61.3275			397.2	399.537	397.2	619.568
	397.4	-159.951	397.4	-150.491			397.4	475.93	397.4	707.864
	397.6	-161.106	397.6	-124.18			397.6	204.261	397.6	310.157
	397.8	-107.892	397.8	-61.5057			397.8	-22.9076	397.8	29.8878
	398	-108.345	398	-31.7457			398	-209.42	398	-153.878
	398.2	-202.562	398.2	-73.7777			398.2	-457.845	398.2	-349.813
	398.4	-324.574	398.4	-110.951			398.4	-742.543	398.4	-575.307
	398.6	-459.194	398.6	-148.83			398.6	-1006.74	398.6	-788.538
	398.8	-594.709	398.8	-189.436			398.8	-1227.57	398.8	-959.019
	399	-717.288	399	-228.396			399	-1417.23	399	-1106.87
	399.2	-824.261	399.2	-266.4			399.2	-1559.54	399.2	-1217.75
	399.4	-917.35	399.4	-294.181			399.4	-1691.12	399.4	-1319.11
[truncated: 303 more rows]

## Sheet: Fig1C
	70 mV holding			MeanM70	SdevM70	CountM70	SemM70		100 mV holding							M100Mean	M100SdevM100Count		M100SEm
	13o01004.abf	13o02035.abf	13o02042.abf						13o01014.abf	13o01019.abf	13o01031.abf	13o02020.abf	13o02037.abf	13o02045.abf	13o02046.abf
0	1	1	1	1	0	3	0		1	1	1	1	1		1	1	0	6	0
0.05	1	0.9897	0.9271	0.972267	0.0394531	3	0.0227782		1	1	0.9735	1	0.9732	0.8828	0.9025	0.961714	0.0489932	7	0.0185177
0.1	0.9654	1	1	0.988467	0.0199763	3	0.0115333		0.9873	1.0138	1	1.0062	1	1	1.0002	1.00107	0.00798096	7	0.00301652
0.15	0.9614	0.9829	1.0001	0.981467	0.0193898	3	0.0111947		1.0068	0.9909	0.9916	0.9969	0.997	0.9922	0.9925	0.995414	0.00559923	7	0.00211631
0.2	0.9395	0.9823	0.9939	0.9719	0.0286524	3	0.0165425		1.0111	1.0353	0.991	0.9483	0.9974	0.9644	0.9999	0.992486	0.0288735	7	0.0109132
0.25	0.9206	0.968	0.9906	0.959733	0.0357247	3	0.0206257		1.0741	0.9769	0.9913	0.9432	0.9902	0.9767	0.9812	0.990514	0.0401847	7	0.0151884
0.3	0.9016	0.956	0.9953	0.950967	0.0470523	3	0.0271657		1.07	0.9673	0.9979	0.9739	0.9769	0.957	0.9467	0.984243	0.0411104	7	0.0155383
0.35	0.7717	0.7833	0.987	0.847333	0.121094	3	0.0699136		0.9761	0.9134	0.9857	0.9456	0.9643	0.9622	0.937	0.9549	0.0247281	7	0.00934635
0.4	0.6689	0.6468	0.9854	0.767033	0.189434	3	0.10937		0.9474	0.8973	0.9744	0.931	0.9506	0.9533	0.907	0.937286	0.0272919	7	0.0103154
0.45	0.5928	0.5374	0.7594	0.629867	0.115548	3	0.066712		0.9277	0.8888	0.9623	0.9239	0.9296	0.9426	0.9055	0.925771	0.023865	7	0.00902013
0.5	0.5616	0.479	0.6736	0.5714	0.0976694	3	0.0563895		0.919	0.8855	0.9421	0.9185	0.9239	0.936	0.8907	0.916529	0.02132	7	0.0080582
0.55	0.5239	0.4319	0.6256	0.527133	0.0968905	3	0.0559397		0.9096	0.9215	0.9197	0.9115	0.9117	0.9339	0.8953	0.914743	0.0119825	7	0.00452895
0.6	0.5115	0.4118	0.5809	0.5014	0.0850012	3	0.0490755		0.9003	0.8445	0.8968	0.9036	0.9001	0.9112	0.8884	0.892129	0.0220976	7	0.00835212
0.65	0.4903	0.3854	0.5733	0.483	0.0941625	3	0.0543647		0.9003	0.8927	0.8814	0.8993	0.8851	0.9013	0.8849	0.892143	0.00836059	7	0.00316001
0.7	0.4731	0.368	0.5441	0.461733	0.0885986	3	0.0511524		0.8879	0.8785	0.861	0.8839	0.8748	0.8914	0.8767	0.879171	0.0100329	7	0.00379208
0.75	0.4561	0.3554	0.5056	0.439033	0.0765406	3	0.0441907		0.8687	0.8227	0.8341	0.8742	0.8649	0.8868	0.8526	0.857714	0.0227298	7	0.00859106
0.8	0.4324	0.3363	0.5079	0.425533	0.0860058	3	0.0496555		0.8613	0.8704	0.8135	0.8697	0.8528	0.883	0.8412	0.855986	0.0230495	7	0.00871188
0.85	0.4229	0.335	0.5029	0.420267	0.083981	3	0.0484864		0.8534	0.8949	0.7992	0.866	0.8288	0.8672	0.8408	0.850043	0.0308062	7	0.0116436
0.9	0.4247	0.3265	0.487	0.412733	0.0809164	3	0.0467171		0.8318	0.8155	0.8	0.862	0.8252	0.8604	0.8177	0.830371	0.02322	7	0.00877634
0.95	0.4055	0.3318	0.4858	0.4077	0.0770236	3	0.0444696		0.8211	0.829	0.7815	0.8542	0.8133	0.854	0.8336	0.826671	0.0251939	7	0.0095224
1	0.4013	0.3305	0.4839	0.405233	0.0767756	3	0.0443264		0.8093	0.7829	0.7791	0.8492	0.8064	0.8516	0.8154	0.813414	0.0286282	7	0.0108204
1.05	0.3913	0.3332	0.4906	0.405033	0.0795936	3	0.0459534		0.7929	0.7899	0.7826	0.8454	0.8029	0.8394	0.8054	0.808357	0.0245539	7	0.00928052
1.1	0.3897	0.3293	0.4803	0.399767	0.0760017	3	0.0438796		0.7802	0.7658	0.7726	0.8458	0.7962	0.835	0.8123	0.801129	0.0310695	7	0.0117432
1.15	0.3755	0.3337	0.4828	0.397333	0.0769105	3	0.0444043		0.7697	0.7682	0.7763	0.8354	0.7832	0.8168	0.8031	0.793243	0.0258156	7	0.00975736
1.2	0.3817	0.3271	0.5006	0.403133	0.0887136	3	0.0512188		0.7645	0.723	0.7625	0.8175	0.7733	0.8171	0.8046	0.780357	0.0347067	7	0.0131179
1.25	0.3652	0.326	0.4993	0.396833	0.0908775	3	0.0524682		0.7601	0.7019	0.7633	0.8139	0.7704	0.8006	0.8044	0.773514	0.0381688	7	0.0144265
1.3	0.3669	0.3482	0.4849	0.4	0.0741177	3	0.0427919		0.7634	0.6996	0.7593	0.8139	0.7526	0.8007	0.7865	0.768	0.037707	7	0.0142519
1.35	0.4381	0.4145	0.5766	0.4764	0.0875744	3	0.0505611		0.8058	0.7753	0.8177	0.8197	0.7475	0.795	0.7979	0.794129	0.0254606	7	0.0096232
1.4	0.512	0.474	0.6173	0.534433	0.0742372	3	0.0428609		0.8168	0.7076	0.842	0.8449	0.7395	0.7902	0.8045	0.792214	0.0515626	7	0.0194888
1.45	0.5384	0.5025	0.6371	0.559333	0.0696989	3	0.0402407		0.8009	0.7762	0.8721	0.8374	0.7246	0.7969	0.8012	0.801329	0.046275	7	0.0174903
1.5	0.5622	0.5442	0.6678	0.5914	0.0667736	3	0.0385518		0.797	0.72	0.8672	0.8421	0.6666	0.782	0.8145	0.7842	0.0698565	7	0.0264033
1.55	0.5966	0.5646	0.7022	0.621133	0.0720059	3	0.0415726		0.7906	0.7868	0.8778	0.8489	0.7076	0.7697	0.8245	0.800843	0.0559133	7	0.0211332
1.6	0.6004	0.5945	0.7217	0.638867	0.0717964	3	0.0414517		0.7921	0.7007	0.8662	0.8497	0.709	0.7819	0.8315	0.790157	0.0654448	7	0.0247358
1.65	0.6185	0.6179	0.7582	0.664867	0.0808296	3	0.046667		0.8022	0.7398	0.8639	0.8889	0.7029	0.7727	0.8397	0.801443	0.0675161	7	0.0255187
1.7	0.6348	0.6375	0.7475	0.673267	0.0643021	3	0.0371248		0.7945	0.7248	0.8621	0.8753	0.6936	0.7655	0.8357	0.793071	0.0691152	7	0.0261231
1.75	0.6499	0.6562	0.7869	0.697667	0.0773425	3	0.0446537		0.7797		0.8588	0.8712	0.69	0.7651	0.8329	0.799617	0.0683206	6	0.0278918
1.8	0.6543	0.677	0.8115	0.714267	0.084968	3	0.0490563		0.77		0.8535	0.8605	0.6881	0.7812	0.8428	0.79935	0.0665235	6	0.0271581
1.85	0.6608	0.6849	0.8285	0.724733	0.0906689	3	0.0523477		0.7599		0.8586	0.847	0.6681	0.7785	0.8319	0.790667	0.0715622	6	0.0292152
1.9	0.674	0.7058	0.828	0.735933	0.081302	3	0.0469397		0.7501		0.8545	0.8437	0.6864	0.7608	0.8254	0.786817	0.065443	6	0.026717
1.95	0.6703	0.7277	0.8474	0.748467	0.0903579	3	0.0521681		0.7529		0.8503	0.83	0.6898	0.7649	0.8324	0.786717	0.0616695	6	0.0251765
2	0.6679	0.7405	0.8506	0.753	0.0919892	3	0.05311		0.7481		0.8465	0.8183	0.6959	0.7564	0.8196	0.7808	0.0567465	6	0.0231667
2.05	0.6776	0.7617	0.8598	0.766367	0.0911896	3	0.0526483		0.7428		0.8428	0.8183	0.7217	0.7482	0.8141	0.781317	0.0497134	6	0.0202954
2.1	0.7404	0.7744	0.8556	0.790133	0.0591896	3	0.0341732		0.729		0.8342	0.8615		0.7394	0.8201	0.79684	0.0592016	5	0.0264758
2.15	0.7478	0.7826	0.8529	0.794433	0.0535399	3	0.0309113		0.7226		0.8194	0.9341		0.7323	0.8305	0.80778	0.0859663	5	0.0384453
2.2	0.7203	0.7827	0.8523	0.7851	0.0660327	3	0.038124		0.7262		0.8006	0.9394		0.7293	0.8197	0.80304	0.0869188	5	0.0388713
2.25	0.7182	0.8	0.8573	0.791833	0.0699087	3	0.0403618		0.7402		0.797	0.9374		0.714	0.8099	0.7997	0.086541	5	0.0387023
2.3	0.7126	0.7931	0.8695	0.791733	0.0784589	3	0.0452983		0.7279		0.7873	0.95		0.7076	0.819	0.79836	0.0958449	5	0.0428632
2.35	0.7234		0.868						0.7227		0.7799	0.9518		0.7086	0.8133	0.79526	0.0972639	5	0.0434977
2.4			0.8584								0.7696	0.9455		0.7098	0.7864	0.802825	0.100637	4	0.0503186
2.45			0.8753								0.7751	0.961		0.707	0.8119	0.81375	0.107355	4	0.0536776
2.5			0.8745									0.9593		0.7073	0.784	0.816867	0.129175	3	0.0745792
2.55														0.7059
2.6														0.7034
														0.6998
														0.6933
														0.7011
														0.693

## Sheet: Fig 2A
Time (min)	300 uM				CNCB2_300_mean	CNCB2_300_sdev	CNCB2_300_count	CNCB2_300_SEM		100 uM				CNCB2_100_mean	CNCB2_100_sdev	CNCB2_100_count	CNCB2_100_SEM			30 uM				CNCB2_30_mean	CNCB2_30_sdev	CNCB2_30_count	CNCB2_30_SEM		10 uM				CNCB2_10_mean	CNCB2_10_sdev	CNCB2_10_count	CNCB2_10_SEM			CNCB2_300_mean	CNCB2_300_SEM	CNCB2_100_mean	CNCB2_100_SEM	CNCB2_30_mean	CNCB2_30_SEM	CNCB2_10_mean	CNCB2_10_SEM
0	1	1	1	1	1	0	4	0		1	1	1	1	1	0	4	0			1	1	1	1	1	0	4	0		1	1	1	1	1	0	4	0			1	0	1	0	1	0	1	0
0.05	1	0.999998	1	1	1	1.15639e-06	4	5.78194e-07		1	1	1	1	1	1.77249e-06	4	8.86246e-07			1	0.999999	1	0.999999	1	1.15178e-06	4	5.75888e-07		1	1	0.999998	1	0.999999	9.43562e-07	4	4.71781e-07			1	5.78194e-07	1	8.86246e-07	1	5.75888e-07	0.999999	4.71781e-07
0.1	1.0151	0.987378	0.971732	0.862857	0.959267	0.0667281	4	0.0333641		0.978964	0.963708	0.961927	0.9657	0.967575	0.00774776	4	0.00387388			0.966309	0.990451	1.00351	0.985267	0.986384	0.0154276	4	0.00771382		1.00223	0.984669	1.03032	1.0339	1.01278	0.0234886	4	0.0117443			0.959267	0.0333641	0.967575	0.00387388	0.986384	0.00771382	1.01278	0.0117443
0.15	1.02694	0.966652	0.952698	0.837101	0.945848	0.0793346	4	0.0396673		0.990912	0.956915	0.948657	0.92715	0.955908	0.0264947	4	0.0132474			0.958916	0.974989	1.01642	0.959976	0.977575	0.0269165	4	0.0134582		0.997448	0.961345	1.03387	1.00841	1.00027	0.0301032	4	0.0150516			0.945848	0.0396673	0.955908	0.0132474	0.977575	0.0134582	1.00027	0.0150516
0.2	0.985009	0.969301	0.938446	0.880107	0.943216	0.0463056	4	0.0231528		0.961182	0.911313	0.910904	0.884616	0.917004	0.0319911	4	0.0159955			0.938105	0.970237	1.00545	0.947998	0.965447	0.0298613	4	0.0149306		0.990394	0.952477	1.01582	1.0264	0.996272	0.0328749	4	0.0164375			0.943216	0.0231528	0.917004	0.0159955	0.965447	0.0149306	0.996272	0.0164375
0.25	0.984249	0.963138	0.916571	0.846999	0.927739	0.0608006	4	0.0304003		0.941162	0.812436	0.898625	0.868599	0.880205	0.0541057	4	0.0270528			0.926926	0.966351	0.981761	0.942021	0.954265	0.0244912	4	0.0122456		0.984178	0.948005	1.00632	1.02764	0.991535	0.034015	4	0.0170075			0.927739	0.0304003	0.880205	0.0270528	0.954265	0.0122456	0.991535	0.0170075
0.3	0.461286	1.01893	0.765656	0.785194	0.757767	0.228709	4	0.114354		0.752341	0.737569	0.75053	0.886691	0.781783	0.0702474	4	0.0351237			0.904645	0.957462	0.968971	0.905304	0.934096	0.0339537	4	0.0169769		0.971833	0.939858	0.988937	1.02336	0.980997	0.0348048	4	0.0174024			0.757767	0.114354	0.781783	0.0351237	0.934096	0.0169769	0.980997	0.0174024
0.35	0.177426	0.480888	0.588462	0.477319	0.431024	0.176756	4	0.0883781		0.605837	0.681374	0.606831	0.786561	0.670151	0.0852896	4	0.0426448			0.887411	0.918804	0.904745	0.913368	0.906082	0.0137276	4	0.00686378		0.953926	0.928209	0.995279	1.0137	0.972779	0.0388274	4	0.0194137			0.431024	0.0883781	0.670151	0.0426448	0.906082	0.00686378	0.972779	0.0194137
0.4	0.0897589	0.26038	0.455317	0.277143	0.27065	0.149411	4	0.0747057		0.539086	0.643963	0.539343	0.78624	0.627158	0.116986	4	0.0584932			0.895218	0.880793	0.835791	0.891	0.875701	0.0272867	4	0.0136433		0.929944	0.890258	0.9391	0.959761	0.929766	0.0291418	4	0.0145709			0.27065	0.0747057	0.627158	0.0584932	0.875701	0.0136433	0.929766	0.0145709
0.45	0.0332694	0.173593	0.357807	0.209792	0.193615	0.133332	4	0.0666661		0.466172	0.597463	0.481034	0.793711	0.584595	0.151266	4	0.0756328			0.852555	0.853715	0.801153	0.906368	0.853448	0.042958	4	0.021479		0.90895	0.891634	0.901652	0.90852	0.902689	0.00809303	4	0.00404651			0.193615	0.0666661	0.584595	0.0756328	0.853448	0.021479	0.902689	0.00404651
0.5	-0.00496965	0.106841	0.280003	0.186609	0.142121	0.120928	4	0.0604641		0.409929	0.546688	0.443474	0.77004	0.542533	0.162453	4	0.0812267			0.826709	0.827659	0.732024	0.907613	0.823501	0.0718109	4	0.0359054		0.881195	0.876947	0.880624	0.90597	0.886184	0.0133244	4	0.00666219			0.142121	0.0604641	0.542533	0.0812267	0.823501	0.0359054	0.886184	0.00666219
0.55	-0.0239806	0.0712977	0.214047	0.144482	0.101462	0.101934	4	0.0509672		0.386537	0.530534	0.408584	0.786375	0.528008	0.183518	4	0.0917588			0.784326	0.819171	0.749549	0.920238	0.818321	0.0736501	4	0.036825		0.858617	0.874254	0.85883	0.884499	0.86905	0.0126367	4	0.00631833			0.101462	0.0509672	0.528008	0.0917588	0.818321	0.036825	0.86905	0.00631833
0.6	-0.0338662	0.0453724	0.176139	0.122251	0.077474	0.0915914	4	0.0457957		0.347165	0.49282	0.366009	0.762884	0.492219	0.191685	4	0.0958427			0.750678	0.801992	0.714499	0.873662	0.785208	0.069036	4	0.034518		0.834479	0.870432	0.845654	0.853136	0.850925	0.015096	4	0.007548			0.077474	0.0457957	0.492219	0.0958427	0.785208	0.034518	0.850925	0.007548
0.65	-0.0477713	0.0360743	0.138532	0.0900553	0.0542226	0.079842	4	0.039921		0.302577	0.470017	0.344288	0.724552	0.460358	0.189964	4	0.0949821			0.740188	0.773642	0.680447	0.872826	0.766776	0.0805262	4	0.0402631		0.814569	0.866733	0.812215	0.8288	0.830579	0.0251914	4	0.0125957			0.0542226	0.039921	0.460358	0.0949821	0.766776	0.0402631	0.830579	0.0125957
0.7	-0.0617851	0.0162517	0.103726	0.0443253	0.0256296	0.0687457	4	0.0343729		0.299227	0.443753	0.32332	0.695797	0.440524	0.181546	4	0.0907729			0.734467	0.741243	0.663784	0.847261	0.746689	0.0756462	4	0.0378231		0.789881	0.857378	0.8198	0.824068	0.822782	0.0276282	4	0.0138141			0.0256296	0.0343729	0.440524	0.0907729	0.746689	0.0378231	0.822782	0.0138141
0.75	-0.0788406	0.00606161	0.0816153	0.0316112	0.0101119	0.0670917	4	0.0335459		0.279178	0.41134	0.293464	0.666947	0.412732	0.179526	4	0.0897629			0.713898	0.731532	0.67361	0.861076	0.745029	0.0810738	4	0.0405369		0.769924	0.857523	0.804541	0.814727	0.811679	0.0360806	4	0.0180403			0.0101119	0.0335459	0.412732	0.0897629	0.745029	0.0405369	0.811679	0.0180403
0.8	-0.0788406	0.00221427	0.0650925	0.0239907	0.00311422	0.060538	4	0.030269		0.252999	0.39606	0.278368	0.634367	0.390449	0.174147	4	0.0870736			0.690758	0.708116	0.669724	0.833103	0.725425	0.0734812	4	0.0367406		0.750913	0.84434	0.782642	0.804524	0.795605	0.0392431	4	0.0196216			0.00311422	0.030269	0.390449	0.0870736	0.725425	0.0367406	0.795605	0.0196216
0.85	-0.0313676	-0.00761443	0.0583227	0.00935341	0.00717351	0.0379697	4	0.0189849		0.236007	0.363033	0.25259	0.596729	0.36209	0.166276	4	0.0831382			0.675653	0.675958	0.642865	0.826192	0.705167	0.0821642	4	0.0410821		0.739583	0.825209	0.775483	0.797549	0.784456	0.0361768	4	0.0180884			0.00717351	0.0189849	0.36209	0.0831382	0.705167	0.0410821	0.784456	0.0180884
0.9	-0.0196352	-0.0117699	0.0460711	-0.0220412	-0.00184381	0.032243	4	0.0161215		0.228492	0.334827	0.234913	0.608585	0.351704	0.178039	4	0.0890196			0.663672	0.651136	0.628377	0.79869	0.685469	0.0768813	4	0.0384407		0.731346	0.814161	0.753773	0.778276	0.769389	0.0354715	4	0.0177357			-0.00184381	0.0161215	0.351704	0.0890196	0.685469	0.0384407	0.769389	0.0177357
0.95	-0.0176798	-0.0180614	0.0345498	-0.033029	-0.00855512	0.0296121	4	0.0148061		0.228893	0.322724	0.217705	0.575208	0.336132	0.166195	4	0.0830975			0.63882	0.642239	0.597214	0.796018	0.668573	0.0873939	4	0.043697		0.719797	0.794026	0.731905	0.753909	0.749909	0.0326254	4	0.0163127			-0.00855512	0.0148061	0.336132	0.0830975	0.668573	0.043697	0.749909	0.0163127
1	-0.00279698	-0.0267068	0.0229909	-0.0558645	-0.0155944	0.0336539	4	0.016827		0.199193	0.292019	0.205402	0.573102	0.317429	0.175636	4	0.0878182			0.630279	0.623763	0.579191	0.786599	0.654958	0.0906497	4	0.0453248		0.708524	0.782632	0.720493	0.742558	0.738552	0.0325932	4	0.0162966			-0.0155944	0.016827	0.317429	0.0878182	0.654958	0.0453248	0.738552	0.0162966
1.05	-0.0169194	-0.0266293	0.007882	-0.0858873	-0.0303885	0.0397505	4	0.0198752		0.208315	0.285492	0.198303	0.52495	0.304265	0.152194	4	0.0760968			0.612227	0.607862	0.554568	0.786427	0.640271	0.100902	4	0.0504509		0.690304	0.770347	0.703321	0.732313	0.724071	0.0354973	4	0.0177486			-0.0303885	0.0198752	0.304265	0.0760968	0.640271	0.0504509	0.724071	0.0177486
1.1	-0.0127913	-0.032136	-0.000293543	-0.0874954	-0.033179	0.0385075	4	0.0192537		0.181677	0.251901	0.184867	0.482441	0.275222	0.14189	4	0.070945			0.578132	0.606129	0.552816	0.779499	0.629144	0.102574	4	0.0512872		0.683295	0.756052	0.690292	0.72748	0.71428	0.0339345	4	0.0169672			-0.033179	0.0192537	0.275222	0.070945	0.629144	0.0512872	0.71428	0.0169672
1.15	0.000462032	-0.0347811	-0.0217324	-0.0854147	-0.0353665	0.0363993	4	0.0181997		0.168472	0.22635	0.171979	0.461327	0.257032	0.13875	4	0.0693751			0.56409	0.585948	0.525129	0.765475	0.61016	0.106555	4	0.0532775		0.670619	0.746757	0.690782	0.719498	0.706914	0.0332835	4	0.0166418			-0.0353665	0.0181997	0.257032	0.0693751	0.61016	0.0532775	0.706914	0.0166418
1.2	-0.0119222	-0.0358781	-0.0464682	-0.114144	-0.0521032	0.0438126	4	0.0219063		0.161003	0.224765	0.168747	0.422684	0.2443	0.122269	4	0.0611344			0.543807	0.575263	0.48855	0.749821	0.58936	0.112818	4	0.0564092		0.663126	0.746829	0.68302	0.703303	0.699069	0.0358166	4	0.0179083			-0.0521032	0.0219063	0.2443	0.0611344	0.58936	0.0564092	0.699069	0.0179083
1.25	-0.00464375	-0.0427947	-0.0381028	-0.117105	-0.0506615	0.047441	4	0.0237205		0.156643	0.221369	0.172923	0.411702	0.240659	0.117296	4	0.0586478			0.529878	0.578675	0.473861	0.735221	0.579409	0.112356	4	0.0561781		0.650276	0.746171	0.675325	0.702669	0.69361	0.0410565	4	0.0205283			-0.0506615	0.0237205	0.240659	0.0586478	0.579409	0.0561781	0.69361	0.0205283
1.3	-0.030064	-0.0171222	-0.0401941	-0.00987195	-0.0243131	0.013485	4	0.0067425		0.147635	0.202715	0.169436	0.35208	0.217967	0.0922331	4	0.0461166			0.525229	0.570533	0.47576	0.735545	0.576767	0.112706	4	0.0563529		0.646957	0.746887	0.681528	0.701896	0.694317	0.0417437	4	0.0208718			-0.0243131	0.0067425	0.217967	0.0461166	0.576767	0.0563529	0.694317	0.0208718
										0.138919	0.192334	0.168465	0.351126	0.212711	0.094828	4	0.047414			0.514394	0.561862	0.455481	0.729284	0.565255	0.117692	4	0.0588459		0.645255	0.744079	0.679615	0.712678	0.695407	0.0425514	4	0.0212757			-0.0073699	0.0180179	0.212711	0.047414	0.565255	0.0588459	0.695407	0.0212757
										0.131503	0.188132	0.151081	0.33347	0.201047	0.0913522	4	0.0456761			0.503322	0.556481	0.45045	0.715145	0.556349	0.114372	4	0.0571858		0.633876	0.745852	0.676498	0.698832	0.688764	0.0466314	4	0.0233157			0.00597531	0.0277459	0.201047	0.0456761	0.556349	0.0571858	0.688764	0.0233157
										0.127141	0.168837	0.146751	0.306849	0.187394	0.0814372	4	0.0407186			0.495941	0.544793	0.427281	0.682452	0.537617	0.107919	4	0.0539595		0.629456	0.74129	0.666718	0.703212	0.685169	0.048026	4	0.024013			0.0100183	0.0384412	0.187394	0.0407186	0.537617	0.0539595	0.685169	0.024013
										0.121798	0.169734	0.148333	0.29508	0.183736	0.076775	4	0.0383875			0.492486	0.544073	0.424493	0.670322	0.532843	0.103915	4	0.0519576		0.621736	0.740257	0.663322	0.7007	0.681504	0.0507384	4	0.0253692			0.0032188	0.0321927	0.183736	0.0383875	0.532843	0.0519576	0.681504	0.0253692
										0.125243	0.158023	0.146515	0.309257	0.18476	0.0841015	4	0.0420508			0.49161	0.538257	0.414848	0.655145	0.524965	0.100601	4	0.0503006		0.617484	0.733626	0.669938	0.711008	0.683014	0.051024	4	0.025512			0.00824992	0.0390237	0.18476	0.0420508	0.524965	0.0503006	0.683014	0.025512
										0.116305	0.1482	0.139658	0.284095	0.172065	0.075894	4	0.037947			0.488682	0.541096	0.404631	0.668552	0.52574	0.110562	4	0.0552809		0.610329	0.749909	0.663364	0.71179	0.683848	0.0604688	4	0.0302344			0.00523086	0.0412578	0.172065	0.037947	0.52574	0.0552809	0.683848	0.0302344
										0.111607	0.1421	0.138359	0.271079	0.165786	0.0714965	4	0.0357483			0.485401	0.53995	0.399964	0.652736	0.519513	0.105864	4	0.0529322		0.60846	0.731965	0.663982	0.717452	0.680465	0.0562042	4	0.0281021			0.0166122	0.0365046	0.165786	0.0357483	0.519513	0.0529322	0.680465	0.0281021
										0.0939266	0.133174	0.132063	0.26614	0.156326	0.0754484	4	0.0377242			0.476355	0.538017	0.406503	0.646534	0.516852	0.101787	4	0.0508937		0.600821	0.715782	0.65616	0.716712	0.672369	0.0554763	4	0.0277382			0.0233672	0.0428585	0.156326	0.0377242	0.516852	0.0508937	0.672369	0.0277382
										0.0953911	0.12996	0.13739	0.247353	0.152524	0.0658153	4	0.0329077			0.474757	0.531519	0.363432	0.632191	0.500475	0.112183	4	0.0560913		0.597131	0.708224	0.650129	0.733638	0.67228	0.0610871	4	0.0305436			0.0226701	0.0359927	0.152524	0.0329077	0.500475	0.0560913	0.67228	0.0305436
										0.0949969	0.109823	0.121516	0.236566	0.140726	0.0648089	4	0.0324044			0.452686	0.525788	0.378027	0.645191	0.500423	0.113814	4	0.0569069		0.589698	0.694342	0.646254	0.72369	0.663496	0.0586466	4	0.0293233			0.0242234	0.0341665	0.140726	0.0324044	0.500423	0.0569069	0.663496	0.0293233
										0.0806013	0.114196	0.125149	0.261188	0.145284	0.07956	4	0.03978			0.458949	0.520567	0.363783	0.631861	0.49379	0.112393	4	0.0561963		0.581189	0.687958	0.641856	0.725644	0.659162	0.0622584	4	0.0311292			0.0238341	0.0334864	0.145284	0.03978	0.49379	0.0561963	0.659162	0.0311292
										0.0837753	0.103669	0.117188	0.244603	0.137309	0.0728339	4	0.0364169			0.453498	0.523893	0.341557	0.624756	0.485926	0.119177	4	0.0595884		0.574666	0.682391	0.641447	0.722606	0.655278	0.063134	4	0.031567			0.013644	0.035795	0.137309	0.0364169	0.485926	0.0595884	0.655278	0.031567
										0.0785962	0.110016	0.11248	0.207555	0.127162	0.0557712	4	0.0278856			0.442278	0.517409	0.329811	0.639638	0.482284	0.130183	4	0.0650914		0.561569	0.680663	0.631509	0.743987	0.654432	0.0771517	4	0.0385759			0.0238815	0.0359496	0.127162	0.0278856	0.482284	0.0650914	0.654432	0.0385759
										0.077483	0.0963091	0.110025	0.200603	0.121105	0.0546516	4	0.0273258			0.437313	0.509967	0.338304	0.635359	0.480236	0.125079	4	0.0625396		0.556851	0.678349	0.622361	0.725485	0.645761	0.0727331	4	0.0363665			0.01489	0.0275476	0.121105	0.0273258	0.480236	0.0625396	0.645761	0.0363665
										0.0786782	0.0901347	0.101117	0.195975	0.116476	0.053785	4	0.0268925			0.421998	0.487413	0.326868	0.632647	0.467231	0.128475	4	0.0642376		0.549056	0.669229	0.631778	0.730968	0.645258	0.0760646	4	0.0380323			0.0168191	0.0328714	0.116476	0.0268925	0.467231	0.0642376	0.645258	0.0380323
										0.0682693	0.0910691	0.100686	0.20909	0.117279	0.0626988	4	0.0313494			0.407061	0.481116	0.311161	0.646453	0.461448	0.141607	4	0.0708036		0.547081	0.669504	0.628528	0.717679	0.640698	0.0722683	4	0.0361341			0.0120298	0.0296058	0.117279	0.0313494	0.461448	0.0708036	0.640698	0.0361341
										0.0727547	0.0779988	0.102543	0.181437	0.108683	0.0502102	4	0.0251051			0.400744	0.472409	0.308986	0.616922	0.449765	0.12997	4	0.0649848		0.540965	0.668039	0.63262	0.707328	0.637238	0.0710658	4	0.0355329			0.0119958	0.0313	0.108683	0.0251051	0.449765	0.0649848	0.637238	0.0355329
										0.0620921	0.0810561	0.0931677	0.189084	0.10635	0.0566193	4	0.0283096			0.404177	0.464337	0.297152	0.64457	0.452559	0.145487	4	0.0727433		0.539773	0.662186	0.628916	0.704847	0.633931	0.0700437	4	0.0350218			0.0160079	0.0261621	0.10635	0.0283096	0.452559	0.0727433	0.633931	0.0350218
										0.0614755	0.0778644	0.0893022	0.176599	0.10131	0.0514753	4	0.0257376			0.390838	0.459572	0.292525	0.635759	0.444674	0.144664	4	0.072332		0.53201	0.660486	0.615112	0.704117	0.627931	0.0735508	4	0.0367754			0.00793465	0.0243992	0.10131	0.0257376	0.444674	0.072332	0.627931	0.0367754
										0.0565374	0.0666326	0.0829948	0.1591	0.0913163	0.0464857	4	0.0232429			0.385122	0.451301	0.27923	0.63888	0.438633	0.151142	4	0.0755712		0.521269	0.658032	0.61523	0.712969	0.626875	0.0809757	4	0.0404878			-0.0117895	0.0320677	0.0913163	0.0232429	0.438633	0.0755712	0.626875	0.0404878
										0.0535274	0.0591758	0.0768921	0.163975	0.0883926	0.051362	4	0.025681			0.372275	0.436051	0.273532	0.633937	0.428949	0.152137	4	0.0760683		0.517173	0.654744	0.605096	0.697652	0.618666	0.0775142	4	0.0387571			-0.00994022	0.0310099	0.0883926	0.025681	0.428949	0.0760683	0.618666	0.0387571
										0.0555861	0.0636965	0.0795583	0.159384	0.0895563	0.0476047	4	0.0238023			0.37625	0.430555	0.249279	0.642257	0.424585	0.163794	4	0.0818969		0.514805	0.6595	0.600533	0.703804	0.61966	0.0817062	4	0.0408531			-0.0181053	0.0340701	0.0895563	0.0238023	0.424585	0.0818969	0.61966	0.0408531
										0.0541665	0.0521641	0.0705633	0.146939	0.0809583	0.0447529	4	0.0223765			0.355294	0.42816	0.242571	0.620417	0.411611	0.158766	4	0.079383		0.503264	0.6548	0.589794	0.705313	0.613293	0.0872715	4	0.0436357			-0.0189703	0.0343254	0.0809583	0.0223765	0.411611	0.079383	0.613293	0.0436357
										0.0465754	0.0514635	0.0686169	0.152148	0.0797009	0.049214	4	0.024607			0.352839	0.419837	0.237432	0.638029	0.412034	0.168448	4	0.084224		0.500613	0.653966	0.583899	0.678238	0.604179	0.0797929	4	0.0398965			-0.0139928	0.0340434	0.0797009	0.024607	0.412034	0.084224	0.604179	0.0398965
										0.0431683	0.0479697	0.0604527	0.153469	0.0762649	0.0519824	4	0.0259912			0.355669	0.413303	0.227168	0.659135	0.413819	0.181108	4	0.0905539		0.491693	0.655063	0.580212	0.686247	0.603304	0.0866965	4	0.0433482			-0.0136995	0.032071	0.0762649	0.0259912	0.413819	0.0905539	0.603304	0.0433482
										0.0471638	0.0497935	0.0530122	0.140311	0.0725701	0.0452239	4	0.0226119			0.344257	0.412379	0.231108	0.645522	0.408316	0.174918	4	0.0874592		0.489975	0.658556	0.5718	0.684483	0.601203	0.0884329	4	0.0442164			-0.0111326	0.0313838	0.0725701	0.0226119	0.408316	0.0874592	0.601203	0.0442164
										0.0411671	0.0325225	0.0487136	0.137011	0.0648535	0.0485575	4	0.0242788			0.328264	0.397795	0.226676	0.631596	0.396083	0.172015	4	0.0860073		0.486488	0.655646	0.5635	0.685692	0.597832	0.090624	4	0.045312					0.0648535	0.0242788	0.396083	0.0860073	0.597832	0.045312
										0.0355607	0.0302474	0.0542389	0.108963	0.0572524	0.0359761	4	0.0179881			0.333812	0.388627	0.218891	0.612794	0.388531	0.165394	4	0.0826972		0.489389	0.655949	0.561029	0.668972	0.593835	0.0846346	4	0.0423173					0.0572524	0.0179881	0.388531	0.0826972	0.593835	0.0423173
										0.0265022	0.0307352	0.0436057	0.104841	0.0514211	0.0363485	4	0.0181743			0.32684	0.381482	0.210472	0.620354	0.384787	0.172478	4	0.0862392		0.477858	0.651019	0.559144	0.67992	0.591985	0.0918716	4	0.0459358					0.0514211	0.0181743	0.384787	0.0862392	0.591985	0.0459358
										0.0279999	0.0348791	0.0431727	0.105953	0.0530011	0.0358419	4	0.017921			0.328631	0.371939	0.17491	0.639521	0.37875	0.193313	4	0.0966567		0.474067	0.64959	0.557087	0.660528	0.585318	0.0874855	4	0.0437427					0.0530011	0.017921	0.37875	0.0966567	0.585318	0.0437427
										0.0305543	0.0272553	0.040021	0.109392	0.0518056	0.0387702	4	0.0193851			0.299007	0.378725	0.174708	0.660633	0.378268	0.206114	4	0.103057		0.468693	0.637437	0.546849	0.673897	0.581719	0.0923615	4	0.0461808					0.0518056	0.0193851	0.378268	0.103057	0.581719	0.0461808
										0.0307826	0.024372	0.0320382	0.121701	0.0522234	0.0464398	4	0.0232199			0.282701	0.36131	0.15816	0.64821	0.362595	0.20797	4	0.103985		0.464206	0.637025	0.538096	0.659244	0.574643	0.0905188	4	0.0452594					0.0522234	0.0232199	0.362595	0.103985	0.574643	0.0452594
										0.0290039	0.0271124	0.0308914	0.10573	0.0481845	0.0383949	4	0.0191974			0.271912	0.360047	0.152483	0.636269	0.355178	0.205795	4	0.102898		0.457954	0.635056	0.532554	0.654068	0.569908	0.0917536	4	0.0458768					0.0481845	0.0191974	0.355178	0.102898	0.569908	0.0458768
										0.0222842		0.0311528	0.113433							0.25689	0.358137	0.143996	0.626233	0.346314	0.206094	4	0.103047		0.45527	0.625416	0.534527	0.667161	0.570594	0.0947472	4	0.0473736							0.346314	0.103047	0.570594	0.0473736
										0.0262319										0.23721	0.352992	0.148495	0.623375	0.340518	0.206324	4	0.103162		0.446159	0.629984	0.524843	0.665101	0.566522	0.0999493	4	0.0499746							0.340518	0.103162	0.566522	0.0499746
																													0.439369	0.627717	0.51369	0.661176	0.560488	0.102498	4	0.0512491									0.560488	0.0512491
																													0.438515	0.565454	0.508823	0.648881	0.540418	0.0890198	4	0.0445099									0.540418	0.0445099
																													0.427847	0.561015	0.50216	0.64179	0.533203	0.0906058	4	0.0453029									0.533203	0.0453029
																													0.427053	0.563972	0.497127	0.636783	0.531234	0.0898691	4	0.0449345									0.531234	0.0449345
																													0.419413	0.565253	0.493864	0.627703	0.526558	0.0899568	4	0.0449784									0.526558	0.0449784
																													0.428526	0.583333	0.49462	0.668581	0.543765	0.104626	4	0.0523132									0.543765	0.0523132
																													0.428995	0.574196	0.500095	0.689903	0.548297	0.111474	4	0.0557371									0.548297	0.0557371
																													0.436957	0.565146	0.504004	0.694676	0.550196	0.109628	4	0.0548139									0.550196	0.0548139
																													0.432674	0.550807	0.504109	0.701389	0.547245	0.113666	4	0.0568332									0.547245	0.0568332
																													0.428464	0.566077	0.508606	0.68791	0.547764	0.109151	4	0.0545757									0.547764	0.0545757
																													0.440816	0.57564	0.511534	0.708991	0.559245	0.114009	4	0.0570047									0.559245	0.0570047
																													0.440254	0.585551	0.5133	0.707679	0.561696	0.113974	4	0.0569871									0.561696	0.0569871
																													0.437216	0.596395	0.516741	0.713342	0.565923	0.117821	4	0.0589104									0.565923	0.0589104
																													0.43474	0.598134	0.515452	0.717322	0.566412	0.120712	4	0.0603561									0.566412	0.0603561
																													0.430552	0.607856	0.51522	0.708722	0.565588	0.119785	4	0.0598926									0.565588	0.0598926
																													0.428774	0.611304	0.514724	0.708033	0.565708	0.120673	4	0.0603364									0.565708	0.0603364
																													0.42294	0.612877	0.508847	0.714776	0.56486	0.126569	4	0.0632845									0.56486	0.0632845
																													0.423925	0.611721	0.510721	0.711758	0.564531	0.12459	4	0.0622952									0.564531	0.0622952
																													0.425996	0.610363	0.508885	0.716689	0.565483	0.12588	4	0.06294									0.565483	0.06294
																													0.415437	0.61325	0.496882	0.724181	0.562437	0.134969	4	0.0674843									0.562437	0.0674843
																													0.412167	0.611429	0.501642	0.709899	0.558784	0.129575	4	0.0647873									0.558784	0.0647873
																													0.408486	0.615327	0.502266	0.709882	0.55899	0.131417	4	0.0657086									0.55899	0.0657086
																													0.404885	0.615447	0.504382	0.704914	0.557407	0.130641	4	0.0653206									0.557407	0.0653206
																													0.396602	0.619976	0.515264	0.724265	0.564027	0.140494	4	0.0702468									0.564027	0.0702468
																													0.399451	0.618698	0.519091	0.710116	0.561839	0.133437	4	0.0667186									0.561839	0.0667186
																													0.397289	0.612363	0.516072	0.715931	0.560414	0.135966	4	0.0679831									0.560414	0.0679831
																													0.388389	0.617459	0.507289	0.707917	0.555264	0.138227	4	0.0691134									0.555264	0.0691134
																													0.383456	0.6316	0.49986	0.727979	0.560724	0.150694	4	0.0753471									0.560724	0.0753471
																													0.382859	0.621873	0.487503	0.710228	0.550616	0.144545	4	0.0722723									0.550616	0.0722723
																													0.383317	0.625659	0.482657	0.712716	0.551088	0.146645	4	0.0733226									0.551088	0.0733226
																													0.381666	0.621845	0.47305	0.717614	0.548543	0.150006	4	0.0750029									0.548543	0.0750029
																													0.375926	0.620712	0.469413	0.712938	0.544747	0.150814	4	0.0754072									0.544747	0.0754072
																													0.37512	0.619909	0.459005	0.708347	0.540595	0.151074	4	0.075537									0.540595	0.075537
																													0.369871	0.617983	0.452609	0.723671	0.541033	0.159576	4	0.0797878									0.541033	0.0797878
																													0.362996	0.624026	0.444267	0.72015	0.53786	0.16329	4	0.0816452									0.53786	0.0816452
																													0.35962	0.620992	0.440817	0.705227	0.531664	0.159118	4	0.0795591									0.531664	0.0795591
																													0.359662	0.624136	0.435729	0.714531	0.533515	0.164079	4	0.0820397									0.533515	0.0820397
																													0.353585	0.629796	0.430083	0.717986	0.532863	0.169677	4	0.0848384									0.532863	0.0848384
																													0.349191	0.629466	0.424444	0.697779	0.52522	0.165112	4	0.082556									0.52522	0.082556
																													0.348243	0.633659	0.419689	0.709578	0.527792	0.171443	4	0.0857214									0.527792	0.0857214
																													0.344424	0.633148	0.418561	0.710638	0.526693	0.173285	4	0.0866424									0.526693	0.0866424
																													0.343773	0.642166	0.414731	0.706006	0.526669	0.174625	4	0.0873127									0.526669	0.0873127
																													0.33871	0.651211	0.417476	0.729656	0.534263	0.185953	4	0.0929764									0.534263	0.0929764
																													0.337273	0.65622	0.411815	0.72509	0.532599	0.187151	4	0.0935753									0.532599	0.0935753
																													0.33491	0.668061	0.408572	0.718349	0.532473	0.189135	4	0.0945676									0.532473	0.0945676
																													0.329421	0.684728	0.407991	0.723166	0.536327	0.196818	4	0.098409									0.536327	0.098409
																													0.33146	0.680833	0.401167	0.717295	0.532689	0.19478	4	0.0973898									0.532689	0.0973898
																													0.325374	0.691258	0.403525	0.72313	0.535822	0.200861	4	0.10043									0.535822	0.10043
																													0.325236	0.683309	0.400258	0.721758	0.53264	0.199172	4	0.0995858									0.53264	0.0995858
																													0.321367	0.690912	0.398538	0.716777	0.531898	0.201307	4	0.100654									0.531898	0.100654
																													0.31785	0.691652	0.39589	0.716519	0.530478	0.203234	4	0.101617									0.530478	0.101617
																													0.315185	0.693084	0.393412	0.699208	0.525222	0.199948	4	0.0999742									0.525222	0.0999742
																													0.309016	0.695519	0.384654	0.693121	0.520578	0.202986	4	0.101493									0.520578	0.101493
																													0.308401	0.686711	0.379787	0.702977	0.519469	0.2047	4	0.10235									0.519469	0.10235
																													0.302222	0.687091	0.374836	0.693533	0.514421	0.205271	4	0.102635									0.514421	0.102635
																													0.299376	0.684765	0.368809	0.709282	0.515558	0.211684	4	0.105842									0.515558	0.105842
																													0.296128	0.688802	0.363437	0.682718	0.507771	0.207367	4	0.103684									0.507771	0.103684
																													0.290119	0.690406	0.356425	0.688734	0.506421	0.213208	4	0.106604									0.506421	0.106604
																													0.287484	0.686141	0.350632	0.688573	0.503208	0.214197	4	0.107098									0.503208	0.107098
																													0.287498	0.688992	0.342981	0.696309	0.503945	0.219093	4	0.109546									0.503945	0.109546
																													0.282281	0.691393		0.694806	0.55616	0.237192	3	0.136943									0.55616	0.136943
																													0.27863	0.690438		0.688228	0.552432	0.237122	3	0.136902									0.552432	0.136902
																													0.271468	0.686476
																													0.27134	0.683973
																													0.267953	0.684763
																													0.270531
																													0.264623

## Sheet: Fig2B
	HP-70		Con		30 uM CNCB2				Con		30 uM CNCB2
			14610026C003		14610026C026		HP-100		14610008C003		14610008C026
		0	1.29425	0	-0.231627			0	-17.4138	0	-18.6345
		0.2	-2.67303	0.2	-2.97821			0.05	-17.1086	0.05	-21.0759
		0.4	-0.841979	0.4	-3.28339			0.1	-16.4983	0.1	-21.3811
		0.6	0.378724	0.6	-2.67303			0.15	-16.1931	0.15	-19.55
		0.8	0.0735484	0.8	-3.89374			0.2	-16.8035	0.2	-18.6345
		1	0.0735484	1	-0.841979			0.25	-16.8035	0.25	-18.9397
		1.2	-1.45233	1.2	-2.36786			0.3	-16.8035	0.3	-19.55
		1.4	1.9046	1.4	-4.50409			0.35	-18.6345	0.35	-19.2449
		1.6	-3.58856	1.6	-1.45233			0.4	-20.7707	0.4	-18.9397
		1.8	-0.231627	1.8	-1.45233			0.45	-22.6018	0.45	-17.719
		2	1.9046	2	-1.75751			0.5	-25.0432	0.5	-15.2776
		2.2	-0.231627	2.2	-2.97821			0.55	-24.738	0.55	-13.7517
		2.4	-1.75751	2.4	-4.19891			0.6	-23.8225	0.6	-14.6672
		2.6	1.9046	2.6	-0.841979			0.65	-24.1277	0.65	-16.8035
		2.8	0.0735484	2.8	-3.89374			0.7	-22.907	0.7	-16.8035
		3	-1.45233	3	-0.536803			0.75	-21.0759	0.75	-16.8035
		3.2	-1.14715	3.2	-1.45233			0.8	-20.7707	0.8	-17.1086
		3.4	0.378724	3.4	-2.67303			0.85	-21.0759	0.85	-18.9397
		3.6	0.378724	3.6	-2.67303			0.9	-22.907	0.9	-20.7707
		3.8	2.82013	3.8	-0.536803			0.95	-25.0432	0.95	-21.6863
		4	-1.75751	4	-0.841979			1	-26.2639	1	-23.2121
		4.2	-1.45233	4.2	0.378724			1.05	-25.9587	1.05	-23.8225
		4.4	0.6839	4.4	-0.841979			1.1	-25.6536	1.1	-24.1277
		4.6	-0.841979	4.6	-2.36786			1.15	-24.738	1.15	-24.4329
		4.8	-0.231627	4.8	-5.72479			1.2	-22.6018	1.2	-24.1277
		5	-0.536803	5	-1.45233			1.25	-19.8552	1.25	-22.6018
		5.2	-1.14715	5.2	-1.75751			1.3	-18.9397	1.3	-21.9914
		5.4	-1.75751	5.4	-1.45233			1.35	-19.8552	1.35	-22.6018
		5.6	-1.14715	5.6	-0.841979			1.4	-21.0759	1.4	-22.907
		5.8	0.378724	5.8	-2.36786			1.45	-22.2966	1.45	-23.5173
		6	0.989076	6	-3.89374			1.5	-22.6018	1.5	-23.5173
		6.2	0.989076	6.2	-2.06268			1.55	-22.2966	1.55	-22.6018
		6.4	0.0735484	6.4	-1.45233			1.6	-20.7707	1.6	-22.6018
		6.6	-1.45233	6.6	-1.45233			1.65	-21.3811	1.65	-22.2966
		6.8	-2.67303	6.8	-4.80926			1.7	-22.2966	1.7	-23.5173
		7	0.378724	7	-4.19891			1.75	-21.3811	1.75	-23.5173
		7.2	1.29425	7.2	-2.67303			1.8	-22.6018	1.8	-23.2121
		7.4	-0.231627	7.4	-2.36786			1.85	-23.2121	1.85	-22.907
		7.6	-1.75751	7.6	-1.45233			1.9	-23.8225	1.9	-22.907
		7.8	0.989076	7.8	-0.841979			1.95	-23.5173	1.95	-23.2121
		8	-0.536803	8	-1.75751			2	-21.3811	2	-22.6018
		8.2	-0.841979	8.2	-3.89374			2.05	-19.2449	2.05	-20.4656
		8.4	-1.45233	8.4	-3.89374			2.1	-18.6345	2.1	-19.55
		8.6	-0.231627	8.6	-2.36786			2.15	-18.3293	2.15	-19.55
		8.8	-1.75751	8.8	-5.11444			2.2	-17.719	2.2	-18.0242
		9	-1.75751	9	-2.06268			2.25	-17.1086	2.25	-16.8035
		9.2	-0.841979	9.2	-0.841979			2.3	-17.4138	2.3	-16.4983
		9.4	-0.536803	9.4	-2.36786			2.35	-18.9397	2.35	-15.5828
		9.6	0.0735484	9.6	-4.19891			2.4	-22.2966	2.4	-15.8879
		9.8	-2.06268	9.8	-3.89374			2.45	-24.1277	2.45	-15.8879
		10	-0.536803	10	-6.33514			2.5	-24.1277	2.5	-16.8035
		10.2	1.59943	10.2	-1.45233			2.55	-23.5173	2.55	-17.719
		10.4	-0.231627	10.4	-1.75751			2.6	-21.6863	2.6	-18.0242
		10.6	-2.36786	10.6	-2.06268			2.65	-21.3811	2.65	-19.55
		10.8	-1.75751	10.8	-2.67303			2.7	-21.6863	2.7	-21.0759
		11	-4.19891	11	-4.19891			2.75	-23.5173	2.75	-22.6018
		11.2	-1.45233	11.2	-1.75751			2.8	-24.4329	2.8	-25.3484
		11.4	-2.36786	11.4	-4.50409			2.85	-24.1277	2.85	-27.1794
		11.6	0.989076	11.6	-1.75751			2.9	-21.6863	2.9	-27.4846
		11.8	0.989076	11.8	-2.97821			2.95	-19.8552	2.95	-26.5691
		12	-1.75751	12	-3.58856			3	-18.0242	3	-25.6536
		12.2	1.29425	12.2	-2.67303			3.05	-17.1086	3.05	-24.4329
		12.4	-1.45233	12.4	-1.14715			3.1	-16.1931	3.1	-22.6018
		12.6	-1.14715	12.6	-3.28339			3.15	-15.8879	3.15	-21.3811
		12.8	-2.36786	12.8	-3.58856			3.2	-17.4138	3.2	-20.4656
		13	-2.67303	13	-6.02997			3.25	-18.3293	3.25	-20.1604
		13.2	-1.14715	13.2	-4.19891			3.3	-18.6345	3.3	-19.2449
		13.4	-1.45233	13.4	-0.231627			3.35	-19.2449	3.35	-19.55
		13.6	-3.89374	13.6	-3.58856			3.4	-19.8552	3.4	-20.1604
		13.8	0.378724	13.8	-3.89374			3.45	-19.8552	3.45	-20.4656
		14	-0.536803	14	-1.45233			3.5	-20.7707	3.5	-20.7707
		14.2	-1.75751	14.2	-3.28339			3.55	-22.2966	3.55	-21.6863
		14.4	-0.841979	14.4	-3.58856			3.6	-24.1277	3.6	-22.2966
		14.6	-2.06268	14.6	-2.36786			3.65	-25.3484	3.65	-22.907
		14.8	-2.67303	14.8	-1.45233			3.7	-24.738	3.7	-22.907
		15	-2.36786	15	-2.97821			3.75	-22.2966	3.75	-22.2966
		15.2	1.29425	15.2	-0.536803			3.8	-20.7707	3.8	-20.1604
		15.4	0.989076	15.4	-2.97821			3.85	-19.8552	3.85	-18.9397
		15.6	0.378724	15.6	-3.28339			3.9	-17.719	3.9	-19.55
		15.8	-1.45233	15.8	-2.36786			3.95	-16.4983	3.95	-19.55
		16	-1.75751	16	2.20978			4	-14.9724	4	-19.55
		16.2	-2.67303	16.2	-4.80926			4.05	-15.8879	4.05	-19.8552
		16.4	0.6839	16.4	-4.19891			4.1	-18.0242	4.1	-21.3811
		16.6	4.65118	16.6	-4.50409			4.15	-18.9397	4.15	-21.3811
		16.8	-0.536803	16.8	-2.67303			4.2	-20.1604	4.2	-20.1604
		17	-1.75751	17	-1.14715			4.25	-19.8552	4.25	-19.8552
		17.2	0.0735484	17.2	-3.58856			4.3	-21.0759	4.3	-20.7707
		17.4	-0.231627	17.4	-4.19891			4.35	-22.907	4.35	-21.9914
		17.6	-2.06268	17.6	-3.58856			4.4	-24.738	4.4	-22.2966
		17.8	-0.536803	17.8	-1.45233			4.45	-27.7898	4.45	-21.6863
		18	0.0735484	18	-1.45233			4.5	-29.6208	4.5	-22.2966
		18.2	-1.14715	18.2	-2.36786			4.55	-29.3157	4.55	-22.907
		18.4	0.378724	18.4	-2.67303			4.6	-27.4846	4.6	-22.2966
		18.6	0.0735484	18.6	-3.28339			4.65	-26.5691	4.65	-22.2966
		18.8	-1.75751	18.8	-4.19891			4.7	-25.3484	4.7	-22.2966
		19	-1.45233	19	-1.75751			4.75	-23.2121	4.75	-21.6863
		19.2	0.6839	19.2	-1.75751			4.8	-20.7707	4.8	-21.6863
		19.4	0.0735484	19.4	-2.06268			4.85	-18.6345	4.85	-21.0759
		19.6	-1.45233	19.6	-2.97821			4.9	-17.4138	4.9	-19.8552
		19.8	-2.36786	19.8	-3.58856			4.95	-15.8879	4.95	-17.4138
		20	-1.14715	20	-4.50409			5	-17.1086	5	-17.4138
		20.2	-1.14715	20.2	-2.06268			5.05	-19.2449	5.05	-19.2449
		20.4	-3.89374	20.4	-2.06268			5.1	-20.1604	5.1	-21.0759
		20.6	1.29425	20.6	-3.28339			5.15	-21.3811	5.15	-22.6018
		20.8	0.6839	20.8	-1.75751			5.2	-22.6018	5.2	-23.8225
		21	0.0735484	21	-2.36786			5.25	-22.6018	5.25	-22.907
		21.2	-1.14715	21.2	-2.36786			5.3	-21.3811	5.3	-21.3811
		21.4	-1.45233	21.4	-1.45233			5.35	-20.4656	5.35	-20.7707
		21.6	-0.231627	21.6	-2.67303			5.4	-20.7707	5.4	-20.1604
		21.8	-0.841979	21.8	-3.89374			5.45	-21.0759	5.45	-19.55
		22	-1.75751	22	-2.06268			5.5	-20.7707	5.5	-19.8552
		22.2	-2.06268	22.2	-2.97821			5.55	-19.8552	5.55	-21.3811
		22.4	-0.841979	22.4	-1.45233			5.6	-18.6345	5.6	-22.6018
		22.6	-0.231627	22.6	-2.06268			5.65	-17.719	5.65	-24.1277
		22.8	-1.14715	22.8	-1.14715			5.7	-17.1086	5.7	-24.738
		23	-1.75751	23	-2.97821			5.75	-17.4138	5.75	-24.4329
		23.2	-1.45233	23.2	-2.67303			5.8	-17.4138	5.8	-23.8225
		23.4	1.29425	23.4	-2.06268			5.85	-16.8035	5.85	-24.1277
		23.6	-3.89374	23.6	-5.11444			5.9	-18.0242	5.9	-22.6018
		23.8	-0.536803	23.8	-2.06268			5.95	-20.1604	5.95	-21.3811
		24	-2.36786	24	-2.06268			6	-20.7707	6	-21.0759
		24.2	0.0735484	24.2	-1.45233			6.05	-19.8552	6.05	-19.8552
		24.4	-1.14715	24.4	-1.45233			6.1	-20.1604	6.1	-16.8035
		24.6	-1.75751	24.6	-1.14715			6.15	-21.6863	6.15	-15.5828
		24.8	-2.06268	24.8	-2.67303			6.2	-22.907	6.2	-15.5828
		25	-1.45233	25	-1.14715			6.25	-24.1277	6.25	-17.1086
		25.2	-2.97821	25.2	-2.97821			6.3	-23.8225	6.3	-19.2449
		25.4	-0.536803	25.4	-2.97821			6.35	-22.6018	6.35	-20.1604
		25.6	0.378724	25.6	-2.67303			6.4	-20.7707	6.4	-20.7707
		25.8	-1.75751	25.8	-2.97821			6.45	-19.2449	6.45	-21.9914
		26	-2.06268	26	-2.97821			6.5	-19.8552	6.5	-22.907
		26.2	-1.45233	26.2	-3.58856			6.55	-19.8552	6.55	-22.6018
		26.4	0.6839	26.4	-2.97821			6.6	-19.8552	6.6	-23.2121
		26.6	-2.67303	26.6	-2.67303			6.65	-19.8552	6.65	-24.1277
		26.8	-2.67303	26.8	-3.89374			6.7	-19.55	6.7	-22.907
		27	-0.841979	27	-4.50409			6.75	-20.4656	6.75	-21.3811
		27.2	-1.45233	27.2	-5.41962			6.8	-21.3811	6.8	-19.55
		27.4	-1.45233	27.4	-0.536803			6.85	-20.7707	6.85	-18.9397
		27.6	-1.45233	27.6	-1.45233			6.9	-19.55	6.9	-19.55
		27.8	-2.67303	27.8	-2.97821			6.95	-19.55	6.95	-20.4656
		28	0.378724	28	-2.06268			7	-20.7707	7	-19.8552
		28.2	-0.841979	28.2	-2.36786			7.05	-20.7707	7.05	-20.4656
		28.4	-2.97821	28.4	-2.06268			7.1	-20.4656	7.1	-20.4656
		28.6	0.0735484	28.6	-1.45233			7.15	-20.1604	7.15	-20.1604
		28.8	-3.28339	28.8	-6.33514			7.2	-20.7707	7.2	-19.55
		29	-0.841979	29	-3.58856			7.25	-20.1604	7.25	-18.6345
		29.2	-2.06268	29.2	-1.75751			7.3	-19.8552	7.3	-18.0242
		29.4	-3.28339	29.4	-2.06268			7.35	-18.9397	7.35	-17.1086
		29.6	0.989076	29.6	-2.36786			7.4	-18.9397	7.4	-17.1086
		29.8	0.378724	29.8	-2.36786			7.45	-20.4656	7.45	-16.8035
		30	-2.36786	30	-4.80926			7.5	-21.3811	7.5	-17.4138
		30.2	-1.45233	30.2	-3.58856			7.55	-20.1604	7.55	-18.3293
		30.4	-0.536803	30.4	-4.19891			7.6	-19.2449	7.6	-18.3293
		30.6	0.0735484	30.6	-2.36786			7.65	-19.55	7.65	-18.9397
		30.8	-1.75751	30.8	-2.97821			7.7	-18.6345	7.7	-21.3811
		31	-1.14715	31	-3.58856			7.75	-18.0242	7.75	-21.6863
		31.2	0.989076	31.2	-3.28339			7.8	-17.719	7.8	-21.6863
		31.4	-2.36786	31.4	-4.19891			7.85	-18.6345	7.85	-21.9914
		31.6	0.378724	31.6	-1.45233			7.9	-20.7707	7.9	-21.9914
		31.8	1.59943	31.8	-2.36786			7.95	-21.0759	7.95	-22.907
		32	1.59943	32	-1.14715			8	-19.8552	8	-22.907
		32.2	-1.45233	32.2	-3.58856			8.05	-20.1604	8.05	-20.4656
		32.4	3.43048	32.4	-4.50409			8.1	-20.7707	8.1	-20.7707
		32.6	-0.536803	32.6	-1.45233			8.15	-21.3811	8.15	-19.8552
		32.8	-3.89374	32.8	-2.06268			8.2	-22.6018	8.2	-19.2449
		33	-0.536803	33	-1.45233			8.25	-23.2121	8.25	-19.55
		33.2	2.82013	33.2	-1.45233			8.3	-23.2121	8.3	-20.1604
		33.4	0.378724	33.4	-0.841979			8.35	-22.907	8.35	-21.3811
		33.6	1.29425	33.6	-2.06268			8.4	-21.9914	8.4	-20.7707
		33.8	0.378724	33.8	-1.75751			8.45	-20.7707	8.45	-20.7707
		34	-1.75751	34	-3.58856			8.5	-18.9397	8.5	-20.4656
		34.2	-0.231627	34.2	-1.14715			8.55	-18.9397	8.55	-21.0759
		34.4	0.0735484	34.4	-1.75751			8.6	-19.8552	8.6	-20.1604
		34.6	-1.14715	34.6	-2.67303			8.65	-20.1604	8.65	-19.55
		34.8	-0.231627	34.8	-2.97821			8.7	-18.9397	8.7	-19.8552
		35	0.378724	35	-1.45233			8.75	-18.3293	8.75	-19.55
		35.2	-0.841979	35.2	-1.45233			8.8	-17.719	8.8	-20.1604
		35.4	-0.231627	35.4	-1.75751			8.85	-19.55	8.85	-20.7707
		35.6	-3.58856	35.6	-1.14715			8.9	-19.8552	8.9	-21.3811
		35.8	-3.89374	35.8	-0.536803			8.95	-18.6345	8.95	-22.907
		36	-1.14715	36	-3.28339			9	-17.719	9	-22.6018
		36.2	4.65118	36.2	-4.50409			9.05	-18.3293	9.05	-21.0759
		36.4	0.989076	36.4	-1.45233			9.1	-19.55	9.1	-21.3811
		36.6	-2.36786	36.6	-2.36786			9.15	-20.1604	9.15	-20.4656
		36.8	-1.45233	36.8	-3.28339			9.2	-20.7707	9.2	-18.6345
		37	-2.36786	37	-2.06268			9.25	-20.4656	9.25	-17.1086
		37.2	0.6839	37.2	-0.536803			9.3	-19.8552	9.3	-16.8035
		37.4	-1.75751	37.4	-1.45233			9.35	-18.9397	9.35	-16.1931
		37.6	0.6839	37.6	-4.19891			9.4	-18.3293	9.4	-16.8035
		37.8	-0.536803	37.8	-4.80926			9.45	-18.6345	9.45	-16.8035
		38	-3.58856	38	-0.841979			9.5	-19.2449	9.5	-17.1086
		38.2	-0.536803	38.2	-0.536803			9.55	-18.9397	9.55	-16.8035
		38.4	0.378724	38.4	-2.67303			9.6	-18.6345	9.6	-16.1931
		38.6	0.378724	38.6	-1.14715			9.65	-18.6345	9.65	-17.4138
		38.8	-2.67303	38.8	-2.67303			9.7	-21.0759	9.7	-20.1604
		39	-0.536803	39	-3.58856			9.75	-22.907	9.75	-21.3811
		39.2	-1.75751	39.2	-1.45233			9.8	-21.9914	9.8	-21.9914
		39.4	0.378724	39.4	-1.75751			9.85	-21.6863	9.85	-22.907
		39.6	-1.45233	39.6	-2.97821			9.9	-21.0759	9.9	-23.5173
		39.8	-0.536803	39.8	-4.80926			9.95	-20.7707	9.95	-23.8225
		40	-0.231627	40	-3.28339			10	-21.9914	10	-23.8225
		40.2	-2.06268	40.2	-1.75751			10.05	-22.907	10.05	-23.8225
		40.4	0.378724	40.4	-2.67303			10.1	-21.9914	10.1	-22.907
		40.6	1.59943	40.6	-1.75751			10.15	-21.3811	10.15	-21.3811
		40.8	-0.231627	40.8	-1.45233			10.2	-21.3811	10.2	-21.6863
		41	-2.06268	41	-3.28339			10.25	-21.9914	10.25	-22.2966
		41.2	-1.14715	41.2	-2.36786			10.3	-23.2121	10.3	-22.6018
		41.4	2.51495	41.4	-3.58856			10.35	-25.0432	10.35	-21.6863
		41.6	-0.841979	41.6	-3.28339			10.4	-24.1277	10.4	-21.9914
		41.8	0.0735484	41.8	-1.14715			10.45	-23.2121	10.45	-22.907
		42	-0.841979	42	-1.45233			10.5	-23.2121	10.5	-22.6018
		42.2	0.0735484	42.2	-3.58856			10.55	-24.1277	10.55	-21.0759
		42.4	-1.75751	42.4	-4.50409			10.6	-24.4329	10.6	-20.4656
		42.6	-1.45233	42.6	-3.28339			10.65	-23.8225	10.65	-19.8552
		42.8	-1.45233	42.8	-3.28339			10.7	-21.9914	10.7	-19.2449
		43	0.989076	43	-2.67303			10.75	-20.1604	10.75	-19.2449
		43.2	-1.14715	43.2	-2.06268			10.8	-21.0759	10.8	-18.0242
		43.4	-1.45233	43.4	-2.97821			10.85	-22.2966	10.85	-17.719
		43.6	-0.841979	43.6	-5.72479			10.9	-21.3811	10.9	-17.719
		43.8	-4.19891	43.8	-1.75751			10.95	-19.8552	10.95	-19.2449
		44	-1.45233	44	-3.58856			11	-20.4656	11	-19.55
		44.2	-3.28339	44.2	-2.67303			11.05	-21.9914	11.05	-18.6345
		44.4	0.378724	44.4	-1.75751			11.1	-23.5173	11.1	-17.1086
		44.6	-0.231627	44.6	-2.36786			11.15	-23.2121	11.15	-16.1931
		44.8	-1.45233	44.8	-2.06268			11.2	-22.907	11.2	-15.8879
		45	-1.75751	45	-3.58856			11.25	-23.2121	11.25	-15.5828
		45.2	-1.45233	45.2	-3.89374			11.3	-24.1277	11.3	-17.4138
		45.4	-0.536803	45.4	-2.67303			11.35	-22.2966	11.35	-18.9397
		45.6	-2.97821	45.6	-3.58856			11.4	-21.0759	11.4	-20.1604
		45.8	-2.36786	45.8	-2.36786			11.45	-20.7707	11.45	-20.1604
		46	-1.14715	46	-2.06268			11.5	-21.6863	11.5	-20.1604
		46.2	0.6839	46.2	-2.06268			11.55	-21.6863	11.55	-21.6863
		46.4	-1.45233	46.4	-3.58856			11.6	-23.5173	11.6	-23.2121
		46.6	-0.536803	46.6	-1.45233			11.65	-25.3484	11.65	-22.2966
		46.8	-1.32999	46.8	-1.32999			11.7	-26.5691	11.7	-21.9914
		47	-264.192	47	-268.159			11.75	-26.2639	11.75	-21.9914
		47.2	22.8349	47.2	18.5625			11.8	-24.4329	11.8	-21.9914
		47.4	62.7818	47.4	62.4767			11.85	-22.907	11.85	-21.9914
		47.6	31.3674	47.6	25.8743			11.9	-22.2966	11.9	-20.1604
		47.8	10.8332	47.8	7.78142			11.95	-21.6863	11.95	-19.2449
		48	4.17218	48	3.56183			12	-22.6018	12	-17.719
		48.2	4.25714	48.2	4.56231			12.05	-24.1277	12.05	-17.4138
		48.4	1.7612	48.4	0.540495			12.1	-24.738	12.1	-18.9397
		48.6	5.77619	48.6	0.588206			12.15	-25.6536	12.15	-20.4656
		48.8	3.77374	48.8	2.85822			12.2	-26.5691	12.2	-20.7707
		49	2.75972	49	0.318309			12.25	-26.8743	12.25	-21.0759
		49.2	0.891906	49.2	-0.939149			12.3	-26.5691	12.3	-20.4656
		49.4	1.21263	49.4	0.297101			12.35	-25.6536	12.35	-18.6345
		49.6	2.188	49.6	0.0517727			12.4	-25.6536	12.4	-17.1086
		49.8	5.64231	49.8	-1.07156			12.45	-25.3484	12.45	-17.4138
		50	1.49901	50	-0.332048			12.5	-23.8225	12.5	-17.719
		50.2	1.04474	50.2	-0.481143			12.55	-22.2966	12.55	-17.4138
		50.4	2.13915	50.4	-0.912608			12.6	-20.4656	12.6	-18.3293
		50.6	0.506299	50.6	0.506299			12.65	-19.2449	12.65	-18.9397
		50.8	-1.11019	50.8	-0.194662			12.7	-18.0242	12.7	-19.2449
		51	0.644115	51	0.0337631			12.75	-18.9397	12.75	-18.9397
		51.2	0.579104	51.2	-0.0312476			12.8	-20.1604	12.8	-18.3293
		51.4	2.35509	51.4	-0.0863144			12.85	-18.6345	12.85	-19.55
		51.6	2.9188	51.6	-0.132958			12.9	-19.2449	12.9	-20.1604
		51.8	0.437884	51.8	-2.61387			12.95	-20.1604	12.95	-20.4656
		52	2.84582	52	-4.47839			13	-20.4656	13	-20.1604
		52.2	3.12265	52.2	0.0708952			13.05	-20.1604	13.05	-21.3811
		52.4	4.62452	52.4	1.57276			13.1	-21.0759	13.1	-22.6018
		52.6	0.331721	52.6	0.0265456			13.15	-21.9914	13.15	-21.6863
		52.8	-0.295858	52.8	0.924845			13.2	-23.2121	13.2	-22.6018
		53	-0.31045	53	0.605077			13.25	-23.5173	13.25	-22.907
		53.2	-0.0176347	53.2	-1.54351			13.3	-22.907	13.3	-21.9914
		53.4	-0.33328	53.4	-2.77469			13.35	-24.4329	13.35	-20.4656
		53.6	1.48891	53.6	0.268203			13.4	-24.738	13.4	-20.7707
		53.8	1.78657	53.8	-0.654836			13.45	-24.738	13.45	-20.7707
		54	-0.356023	54	-2.79743			13.5	-25.0432	13.5	-20.1604
		54.2	0.248939	54.2	-2.19247			13.55	-25.0432	13.55	-20.4656
		54.4	1.46508	54.4	-0.0608023			13.6	-23.5173	13.6	-20.7707
		54.6	0.545682	54.6	-0.0646692			13.65	-21.3811	13.65	-20.4656
		54.8	2.06829	54.8	-0.0679446			13.7	-20.1604	13.7	-20.7707
		55	0.844808	55	-3.12248			13.75	-19.8552	13.75	-20.7707
		55.2	-2.51448	55.2	-1.29377			13.8	-18.9397	13.8	-20.7707
		55.4	3.58705	55.4	-0.0750597			13.85	-18.6345	13.85	-20.7707
		55.6	-0.381922	55.6	-0.992273			13.9	-20.4656	13.9	-20.4656
		55.8	-0.688526	55.8	-0.38335			13.95	-20.7707	13.95	-20.4656
		56	1.75167	56	-4.04667			14	-20.7707	14	-21.9914
		56.2	-1.60629	56.2	-0.385584			14.05	-21.9914	14.05	-22.907
		56.4	-1.91233	56.4	-2.52268			14.1	-23.8225	14.1	-22.6018
		56.6	1.44387	56.6	-1.91307			14.15	-23.5173	14.15	-23.5173
		56.8	1.44324	56.8	1.44324			14.2	-22.2966	14.2	-25.6536
		57	-0.083162	57	-2.21939			14.25	-21.6863	14.25	-26.8743
		57.2	0.221567	57.2	-0.999136			14.3	-22.6018	14.3	-25.6536
		57.4	1.13672	57.4	-0.694339			14.35	-21.3811	14.35	-24.1277
		57.6	-0.999835	57.6	-0.0843078			14.4	-19.8552	14.4	-22.2966
		57.8	0.220596	57.8	-0.694931			14.45	-18.3293	14.45	-20.7707
		58	3.27212	58	-1.91586			14.5	-18.0242	14.5	-19.8552
		58.2	-0.0850042	58.2	-4.05229			14.55	-18.3293	14.55	-17.719
		58.4	-1.91622	58.4	-2.83175			14.6	-20.4656	14.6	-16.8035
		58.6	2.05092	58.6	-0.390485			14.65	-23.2121	14.65	-18.6345
		58.8	1.74563	58.8	-2.22166			14.7	-25.0432	14.7	-20.1604
		59	-1.91658	59	0.219648			14.75	-25.6536	14.75	-20.1604
		59.2	-0.695964	59.2	-2.83219			14.8	-24.1277	14.8	-19.55
		59.4	-0.39086	59.4	-2.22192			14.85	-21.3811	14.85	-20.7707
		59.6	2.35566	59.6	0.21943			14.9	-19.55	14.9	-21.0759
		59.8	-0.0857972	59.8	0.219379			14.95	-18.9397	14.95	-20.7707
		60	-0.085841	60	-0.085841			15	-20.7707	15	-20.7707
		60.2	2.96588	60.2	-2.52728			15.05	-21.3811	15.05	-21.9914
		60.4	1.43997	60.4	-2.52732			15.1	-21.9914	15.1	-22.907
		60.6	0.829591	60.6	-1.91699			15.15	-21.3811	15.15	-21.3811
		60.8	0.219217	60.8	-1.91701			15.2	-22.907	15.2	-19.8552
		61	-0.696329	61	0.219198			15.25	-25.6536	15.25	-19.2449
		61.2	-1.3067	61.2	-0.696345			15.3	-25.6536	15.3	-19.8552
		61.4	2.3554	61.4	-2.83259			15.35	-23.8225	15.35	-21.0759
		61.6	-1.6119	61.6	-0.0860189			15.4	-22.6018	15.4	-22.2966
		61.8	-1.30673	61.8	-2.52743			15.45	-23.5173	15.45	-22.2966
		62	3.57607	62	-2.83262			15.5	-26.2639	15.5	-22.6018
		62.2	-1.61192	62.2	-1.00157			15.55	-28.7053	15.55	-23.2121
		62.4	-0.696402	62.4	-1.61193			15.6	-29.926	15.6	-22.907
		62.6	1.13465	62.6	-0.391231			15.65	-30.2312	15.65	-23.5173
		62.8	-0.391235	62.8	-1.30676			15.7	-29.3157	15.7	-22.907
		63	-1.00159	63	-1.91712			15.75	-28.095	15.75	-22.6018
		63.2	0.21911	63.2	-1.00159			15.8	-25.3484	15.8	-21.9914
		63.4	0.829459	63.4	0.524283			15.85	-22.6018	15.85	-20.7707
		63.6	0.219105	63.6	-1.0016			15.9	-21.0759	15.9	-19.8552
		63.8	-2.2223	63.8	-1.30678			15.95	-21.0759	15.95	-21.0759
		64	-0.696426	64	-1.30678			16	-20.4656	16	-21.0759
		64.2	-0.0860757	64.2	-2.52748			16.05	-20.7707	16.05	-21.6863
		64.4	-1.91713	64.4	-2.22231			16.1	-22.6018	16.1	-22.907
		64.6	1.13463	64.6	2.35533			16.15	-22.2966	16.15	-22.907
		64.8	-0.391254	64.8	-0.69643			16.2	-22.907	16.2	-22.2966
		65	-1.30678	65	-2.22231			16.25	-23.8225	16.25	-21.6863
		65.2	0.219096	65.2	-5.57924			16.3	-24.738	16.3	-21.3811
		65.4	2.05015	65.4	-3.44301			16.35	-25.6536	16.35	-20.4656
		65.6	2.35533	65.6	-0.0860808			16.4	-26.8743	16.4	-21.0759
		65.8	1.13462	65.8	-1.30678			16.45	-27.4846	16.45	-20.4656
		66	0.219094	66	-3.44301			16.5	-25.9587	16.5	-19.8552
		66.2	-0.0860817	66.2	-1.00161			16.55	-25.0432	16.55	-18.9397
		66.4	0.829445	66.4	0.52427			16.6	-24.738	16.6	-18.9397
		66.6	-0.391258	66.6	1.74497			16.65	-23.5173	16.65	-20.1604
		66.8	-2.22231	66.8	-0.391258			16.7	-21.9914	16.7	-21.9914
		67	0.524269	67	-1.30679			16.75	-20.4656	16.75	-23.5173
		67.2	0.524269	67.2	0.219093			16.8	-19.2449	16.8	-25.3484
		67.4	0.829445	67.4	1.4398			16.85	-18.6345	16.85	-26.2639
		67.6	1.74497	67.6	-3.74819			16.9	-19.55	16.9	-25.3484
		67.8	4.18638	67.8	-1.00161			16.95	-20.1604	16.95	-25.0432
		68	2.6605	68	-0.696434			17	-22.6018	17	-25.0432
		68.2	-3.44302	68.2	-0.696434			17.05	-24.4329	17.05	-24.738
		68.4	1.13462	68.4	-0.0860829			17.1	-26.2639	17.1	-23.5173
		68.6	4.79673	68.6	0.524269			17.15	-26.5691	17.15	-23.2121
		68.8	0.829444	68.8	-1.30679			17.2	-25.0432	17.2	-23.2121
		69	-1.30679	69	0.219093			17.25	-25.9587	17.25	-24.1277
		69.2	1.13462	69.2	-0.086083			17.3	-26.8743	17.3	-26.5691
		69.4	-0.086083	69.4	-2.22231			17.35	-29.0105	17.35	-27.1794
		69.6	1.74497	69.6	-2.52749			17.4	-29.926	17.4	-26.8743
		69.8	2.05015	69.8	0.219093			17.45	-28.7053	17.45	-23.8225
		70	-0.391259	70	-1.61196			17.5	-28.4001	17.5	-21.6863
		70.2	-0.0860831	70.2	-1.30679			17.55	-28.4001	17.55	-21.0759
		70.4	0.829444	70.4	-1.61196			17.6	-28.7053	17.6	-18.9397
		70.6	-0.391259	70.6	0.829444			17.65	-26.8743	17.65	-16.4983
		70.8	0.524268	70.8	0.524268			17.7	-23.5173	17.7	-17.1086
		71	2.05015	71	0.219093			17.75	-21.3811	17.75	-19.55
		71.2	0.829444	71.2	-0.696435			17.8	-23.2121	17.8	-21.3811
		71.4	1.13462	71.4	-1.00161			17.85	-25.3484	17.85	-22.2966
		71.6	2.35532	71.6	-2.52749			17.9	-26.8743	17.9	-21.6863
		71.8	-0.391259	71.8	-0.391259			17.95	-24.738	17.95	-22.2966
		72	-0.0860831	72	0.219093			18	-24.1277	18	-23.5173
		72.2	1.13462	72.2	-3.13784			18.05	-23.2121	18.05	-25.6536
		72.4	1.74497	72.4	-0.391259			18.1	-22.2966	18.1	-26.5691
		72.6	2.96567	72.6	0.219093			18.15	-20.7707	18.15	-25.0432
		72.8	-2.22231	72.8	-2.22231			18.2	-21.6863	18.2	-22.907
		73	-0.0860831	73	-3.44302			18.25	-23.2121	18.25	-21.3811
		73.2	1.74497	73.2	-1.30679			18.3	-23.8225	18.3	-21.3811
		73.4	-0.0860831	73.4	1.13462			18.35	-23.2121	18.35	-21.6863
		73.6	-0.0860831	73.6	-1.61196			18.4	-23.2121	18.4	-20.4656
		73.8	1.74497	73.8	-1.61196			18.45	-23.5173	18.45	-20.7707
		74	0.524268	74	-0.0860831			18.5	-24.4329	18.5	-21.3811
		74.2	1.4398	74.2	-1.91714			18.55	-26.8743	18.55	-21.3811
		74.4	-0.0860831	74.4	-3.13784			18.6	-28.7053	18.6	-21.3811
		74.6	-0.0860831	74.6	-1.00161			18.65	-29.3157	18.65	-21.6863
		74.8	-0.0860831	74.8	-1.91714			18.7	-30.2312	18.7	-21.3811
		75	-0.391259	75	-1.00161			18.75	-31.7571	18.75	-20.4656
		75.2	1.4398	75.2	-0.696435			18.8	-31.7571	18.8	-19.8552
		75.4	-2.83267	75.4	-2.22231			18.85	-30.5364	18.85	-20.4656
		75.6	-3.13784	75.6	-4.35854			18.9	-27.4846	18.9	-20.4656
		75.8	1.4398	75.8	-0.696435			18.95	-24.1277	18.95	-20.4656
		76	1.4398	76	-1.91714			19	-21.0759	19	-21.6863
		76.2	2.6605	76.2	-1.00161			19.05	-20.4656	19.05	-23.8225
		76.4	-1.30679	76.4	-2.22231			19.1	-20.7707	19.1	-25.3484
		76.6	-1.30679	76.6	-3.74819			19.15	-20.7707	19.15	-25.3484
		76.8	-0.391259	76.8	-1.61196			19.2	-21.6863	19.2	-23.5173
		77	3.27085	77	-1.00161			19.25	-21.6863	19.25	-22.907
		77.2	0.524268	77.2	-2.83267			19.3	-20.4656	19.3	-23.2121
		77.4	1.74497	77.4	-2.83267			19.35	-19.55	19.35	-21.9914
		77.6	1.13462	77.6	-0.696435			19.4	-19.2449	19.4	-20.1604
		77.8	-0.696435	77.8	-1.00161			19.45	-19.55	19.45	-18.9397
		78	1.4398	78	-1.30679			19.5	-20.7707	19.5	-20.4656
		78.2	-1.00161	78.2	0.829444			19.55	-23.2121	19.55	-22.6018
		78.4	0.829444	78.4	-2.22231			19.6	-24.738	19.6	-23.2121
		78.6	0.829444	78.6	-3.13784			19.65	-23.5173	19.65	-23.5173
		78.8	0.524268	78.8	-0.391259			19.7	-21.0759	19.7	-25.0432
		79	-0.0860831	79	-0.0860831			19.75	-20.7707	19.75	-25.3484
		79.2	-2.22231	79.2	-1.61196			19.8	-20.1604	19.8	-23.5173
		79.4	-0.0860831	79.4	-1.91714			19.85	-20.1604	19.85	-21.9914
		79.6	-1.61196	79.6	-6.1896			19.9	-20.4656	19.9	-21.9914
		79.8	0.524268	79.8	-0.696435			19.95	-19.55	19.95	-24.738
		80	1.4398	80	-0.391259			20	-18.3293	20	-26.8743
		80.2	1.13462	80.2	-1.61196			20.05	-19.8552	20.05	-26.8743
		80.4	-1.30679	80.4	-3.74819			20.1	-22.2966	20.1	-24.1277
		80.6	1.13462	80.6	-1.61196			20.15	-22.6018	20.15	-22.2966
		80.8	-2.22231	80.8	-1.61196			20.2	-21.9914	20.2	-21.3811
		81	0.524268	81	-1.00161			20.25	-21.3811	20.25	-21.0759
		81.2	0.524268	81.2	-1.61196			20.3	-21.3811	20.3	-19.55
		81.4	2.05015	81.4	0.219093			20.35	-20.7707	20.35	-18.3293
		81.6	1.74497	81.6	0.829444			20.4	-19.8552	20.4	-18.3293
		81.8	2.05015	81.8	-1.61196			20.45	-20.1604	20.45	-18.6345
		82	1.4398	82	-2.83267			20.5	-20.4656	20.5	-20.1604
		82.2	0.219093	82.2	-2.52749			20.55	-21.0759	20.55	-21.6863
		82.4	2.96567	82.4	0.219093			20.6	-22.2966	20.6	-22.907
		82.6	2.6605	82.6	-0.391259			20.65	-24.4329	20.65	-23.8225
		82.8	3.27085	82.8	-3.13784			20.7	-25.3484	20.7	-23.8225
		83	1.4398	83	0.524268			20.75	-25.6536	20.75	-22.6018
		83.2	1.74497	83.2	-2.52749			20.8	-26.2639	20.8	-21.9914
		83.4	1.74497	83.4	-2.22231			20.85	-25.9587	20.85	-20.7707
		83.6	-0.391259	83.6	-1.00161			20.9	-25.9587	20.9	-21.3811
		83.8	-1.61196	83.8	-1.91714			20.95	-25.0432	20.95	-20.1604
		84	2.05015	84	-0.0860831			21	-22.6018	21	-18.6345
		84.2	1.74497	84.2	1.4398			21.05	-20.1604	21.05	-18.6345
		84.4	1.13462	84.4	-0.0860831			21.1	-18.6345	21.1	-18.9397
		84.6	-1.61196	84.6	-1.00161			21.15	-18.9397	21.15	-21.6863
		84.8	-0.696435	84.8	0.219093			21.2	-18.6345	21.2	-22.6018
		85	0.524268	85	0.829444			21.25	-19.8552	21.25	-22.907
		85.2	-0.0860831	85.2	-0.0860831			21.3	-21.9914	21.3	-24.1277
		85.4	1.13462	85.4	-0.696435			21.35	-23.5173	21.35	-24.1277
		85.6	1.74497	85.6	0.829444			21.4	-25.0432	21.4	-23.5173
		85.8	2.96567	85.8	-0.0860831			21.45	-27.1794	21.45	-22.907
		86	3.27085	86	1.74497			21.5	-27.1794	21.5	-20.7707
		86.2	2.35532	86.2	-0.0860831			21.55	-25.9587	21.55	-17.719
		86.4	-0.0860831	86.4	-0.696435			21.6	-24.4329	21.6	-17.1086
		86.6	1.4398	86.6	-0.0860831			21.65	-23.5173	21.65	-17.1086
		86.8	2.6605	86.8	-1.30679			21.7	-22.907	21.7	-17.4138
		87	-0.0860831	87	-1.30679			21.75	-23.5173	21.75	-17.4138
		87.2	0.829444	87.2	-2.83267			21.8	-22.907	21.8	-18.0242
		87.4	-2.83267	87.4	-0.696435			21.85	-21.3811	21.85	-18.9397
		87.6	1.74497	87.6	1.13462			21.9	-20.7707	21.9	-18.6345
		87.8	0.219093	87.8	-3.13784			21.95	-20.1604	21.95	-19.55
		88	-3.13784	88	-2.22231			22	-21.0759	22	-20.1604
		88.2	1.13462	88.2	0.219093			22.05	-21.9914	22.05	-19.8552
		88.4	-2.22231	88.4	-0.696435			22.1	-21.6863	22.1	-21.3811
		88.6	-0.391259	88.6	-0.391259			22.15	-21.6863	22.15	-22.2966
		88.8	1.13462	88.8	-3.44302			22.2	-21.6863	22.2	-21.3811
		89	-0.0860831	89	0.524268			22.25	-22.2966	22.25	-21.6863
		89.2	-0.0860831	89.2	0.829444			22.3	-22.6018	22.3	-21.9914
		89.4	0.219093	89.4	13.6468			22.35	-21.9914	22.35	-22.6018
		89.6	1.4398	89.6	23.7176			22.4	-21.9914	22.4	-22.6018
		89.8	-1.61196	89.8	-22.6691			22.45	-22.6018	22.45	-22.907
		90	1.4398	90	-27.8571			22.5	-24.4329	22.5	-23.8225
		90.2	-0.696435	90.2	-14.4293			22.55	-24.1277	22.55	-23.8225
		90.4	-0.696435	90.4	-5.88442			22.6	-21.9914	22.6	-23.5173
		90.6	0.219093	90.6	-2.22231			22.65	-21.6863	22.65	-22.6018
		90.8	1.74497	90.8	-2.83267			22.7	-22.907	22.7	-21.6863
		91	-1.00161	91	-0.391259			22.75	-23.2121	22.75	-22.2966
		91.2	-2.22231	91.2	-0.391259			22.8	-23.5173	22.8	-22.6018
		91.4	-1.30679	91.4	-0.0860831			22.85	-21.9914	22.85	-21.3811
		91.6	0.829444	91.6	-0.0860831			22.9	-18.6345	22.9	-21.3811
		91.8	-2.22231	91.8	-2.83267			22.95	-18.0242	22.95	-21.3811
		92	2.96567	92	-1.91714			23	-20.4656	23	-20.4656
		92.2	2.96567	92.2	-1.61196			23.05	-21.6863	23.05	-19.55
		92.4	0.524268	92.4	-0.391259			23.1	-21.3811	23.1	-19.2449
		92.6	-1.61196	92.6	-0.0860831			23.15	-21.3811	23.15	-19.2449
		92.8	-1.61196	92.8	-2.52749			23.2	-21.9914	23.2	-19.8552
		93	1.4398	93	-3.44302			23.25	-24.1277	23.25	-19.8552
		93.2	-0.0860831	93.2	-2.83267			23.3	-25.9587	23.3	-18.9397
		93.4	-0.0860831	93.4	-2.22231			23.35	-26.5691	23.35	-18.3293
		93.6	-0.0860831	93.6	-3.13784			23.4	-26.2639	23.4	-19.2449
		93.8	-0.696435	93.8	-2.52749			23.45	-23.8225	23.45	-18.9397
		94	3.8812	94	-0.696435			23.5	-21.0759	23.5	-18.9397
		94.2	-0.0860831	94.2	-1.30679			23.55	-21.0759	23.55	-19.55
		94.4	1.13462	94.4	-3.74819			23.6	-21.9914	23.6	-20.4656
		94.6	-0.696435	94.6	-0.696435			23.65	-22.2966	23.65	-19.55
		94.8	-1.00161	94.8	-1.91714			23.7	-21.0759	23.7	-18.9397
		95	-1.61196	95	-2.22231			23.75	-21.0759	23.75	-20.4656
		95.2	1.4398	95.2	-0.391259			23.8	-21.6863	23.8	-21.3811
		95.4	0.219093	95.4	-0.696435			23.85	-23.2121	23.85	-20.4656
		95.6	2.05015	95.6	-4.05337			23.9	-24.1277	23.9	-20.7707
		95.8	0.829444	95.8	-2.22231			23.95	-23.5173	23.95	-21.0759
		96	-0.391259	96	-2.52749			24	-24.1277	24	-22.2966
		96.2	2.35532	96.2	-2.22231			24.05	-23.8225	24.05	-22.6018
		96.4	-0.0860831	96.4	-5.27407			24.1	-23.2121	24.1	-23.2121
		96.6	-0.0860831	96.6	-2.83267			24.15	-21.9914	24.15	-23.2121
		96.8	2.05015	96.8	-0.696435			24.2	-21.9914	24.2	-22.2966
		97	-0.696435	97	-2.52749			24.25	-21.6863	24.25	-23.5173
		97.2	-1.00161	97.2	-1.30679			24.3	-21.0759	24.3	-24.4329
		97.4	-1.30679	97.4	-1.30679			24.35	-20.7707	24.35	-24.738
		97.6	-1.00161	97.6	-1.91714			24.4	-19.2449	24.4	-22.2966
		97.8	2.96567	97.8	-0.0860831			24.45	-17.4138	24.45	-18.6345
		98	4.18638	98	-1.00161			24.5	-18.3293	24.5	-16.4983
		98.2	0.524268	98.2	-2.22231			24.55	-21.0759	24.55	-14.362
		98.4	0.524268	98.4	-1.91714			24.6	-22.907	24.6	-15.2776
		98.6	0.829444	98.6	-3.74819			24.65	-24.738	24.65	-15.8879
		98.8	2.05015	98.8	-4.05337			24.7	-25.9587	24.7	-16.4983
		99	-0.0860831	99	0.219093			24.75	-25.6536	24.75	-18.3293
		99.2	-1.00161	99.2	-0.391259			24.8	-25.9587	24.8	-21.3811
		99.4	0.829444	99.4	-3.13784			24.85	-25.9587	24.85	-23.2121
		99.6	-2.52749	99.6	-1.91714			24.9	-24.738	24.9	-23.8225
		99.8	1.74497	99.8	-1.30679			24.95	-23.8225	24.95	-24.1277
		100	1.74497	100	-3.74819			25	-22.2966	25	-23.8225
		100.2	-1.00161	100.2	-2.83267			25.05	-22.2966	25.05	-23.8225
		100.4	1.13462	100.4	1.13462			25.1	-22.6018	25.1	-23.5173
		100.6	0.524268	100.6	-0.391259			25.15	-22.6018	25.15	-22.907
		100.8	0.219093	100.8	-1.30679			25.2	-21.3811	25.2	-23.2121
		101	1.13462	101	-2.22231			25.25	-20.4656	25.25	-23.2121
		101.2	2.35532	101.2	-2.22231			25.3	-21.0759	25.3	-21.9914
		101.4	-1.00161	101.4	-3.13784			25.35	-22.6018	25.35	-20.7707
		101.6	-0.0860831	101.6	-2.83267			25.4	-24.4329	25.4	-21.0759
		101.8	-0.391259	101.8	-3.13784			25.45	-26.8743	25.45	-21.6863
		102	2.05015	102	0.829444			25.5	-27.1794	25.5	-21.6863
		102.2	1.4398	102.2	-0.391259			25.55	-25.9587	25.55	-20.4656
		102.4	-0.0860831	102.4	-3.13784			25.6	-24.738	25.6	-19.55
		102.6	-1.00161	102.6	-0.696435			25.65	-23.8225	25.65	-18.9397
		102.8	-0.0860831	102.8	-3.44302			25.7	-23.8225	25.7	-16.8035
		103	1.74497	103	-0.391259			25.75	-23.2121	25.75	-16.4983
		103.2	0.829444	103.2	-1.30679			25.8	-22.907	25.8	-16.8035
		103.4	-0.0860831	103.4	-3.74819			25.85	-21.9914	25.85	-17.719
		103.6	-0.0860831	103.6	-0.391259			25.9	-20.7707	25.9	-18.6345
		103.8	-0.391259	103.8	-2.52749			25.95	-20.1604	25.95	-19.55
		104	3.27085	104	-2.83267			26	-19.55	26	-19.8552
		104.2	2.96567	104.2	-1.61196			26.05	-19.2449	26.05	-20.7707
		104.4	-0.0860831	104.4	1.74497			26.1	-18.6345	26.1	-21.0759
		104.6	-0.696435	104.6	0.524268			26.15	-20.4656	26.15	-20.1604
		104.8	3.27085	104.8	-1.91714			26.2	-23.2121	26.2	-18.6345
		105	-3.13784	105	-0.696435			26.25	-25.0432	26.25	-18.0242
		105.2	1.13462	105.2	-2.22231			26.3	-24.738	26.3	-18.6345
		105.4	1.4398	105.4	-2.52749			26.35	-22.907	26.35	-19.2449
		105.6	-0.391259	105.6	-1.00161			26.4	-21.6863	26.4	-19.8552
		105.8	-1.30679	105.8	-0.391259			26.45	-22.2966	26.45	-21.9914
		106	-0.696435	106	-1.61196			26.5	-22.6018	26.5	-22.2966
		106.2	-0.0860831	106.2	-3.13784			26.55	-22.907	26.55	-21.9914
		106.4	-0.696435	106.4	-2.22231			26.6	-24.1277	26.6	-21.3811
		106.6	0.829444	106.6	-1.30679			26.65	-24.4329	26.65	-21.0759
		106.8	1.13462	106.8	0.524268			26.7	-23.8225	26.7	-21.9914
		107	-0.0860831	107	-3.13784			26.75	-22.907	26.75	-22.6018
		107.2	0.219093	107.2	-3.13784			26.8	-22.907	26.8	-21.3811
		107.4	1.74497	107.4	-1.30679			26.85	-22.6018	26.85	-22.6018
		107.6	0.219093	107.6	-1.61196			26.9	-21.0759	26.9	-25.0432
		107.8	0.524268	107.8	-0.0860831			26.95	-18.9397	26.95	-25.3484
		108	1.13462	108	-1.91714			27	-19.8552	27	-24.1277
		108.2	-0.391259	108.2	1.13462			27.05	-21.9914	27.05	-22.6018
		108.4	1.4398	108.4	-4.35854			27.1	-23.5173	27.1	-21.9914
		108.6	2.6605	108.6	-0.0860831			27.15	-24.4329	27.15	-21.3811
		108.8	0.219093	108.8	-0.696435			27.2	-24.738	27.2	-21.3811
		109	-2.52749	109	-1.61196			27.25	-26.5691	27.25	-19.55
		109.2	-0.391259	109.2	-2.22231			27.3	-28.095	27.3	-19.8552
		109.4	1.74497	109.4	-3.44302			27.35	-26.8743	27.35	-18.9397
		109.6	-4.35854	109.6	-3.44302			27.4	-25.6536	27.4	-17.719
		109.8	-0.0860831	109.8	-1.61196			27.45	-23.8225	27.45	-17.1086
		110	-0.0860831	110	-0.0860831			27.5	-20.4656	27.5	-16.8035
		110.2	0.219093	110.2	-1.30679			27.55	-17.4138	27.55	-16.4983
		110.4	-0.0860831	110.4	-3.13784			27.6	-16.1931	27.6	-16.4983
		110.6	2.6605	110.6	-4.66372			27.65	-17.1086	27.65	-17.1086
		110.8	-0.391259	110.8	-2.22231			27.7	-18.9397	27.7	-17.719
		111	1.13462	111	-2.52749			27.75	-21.3811	27.75	-17.719
		111.2	3.27085	111.2	-1.30679			27.8	-22.6018	27.8	-17.1086
		111.4	2.05015	111.4	-2.83267			27.85	-21.9914	27.85	-16.8035
		111.6	-0.696435	111.6	-4.05337			27.9	-21.0759	27.9	-18.9397
		111.8	1.4398	111.8	-0.391259			27.95	-22.2966	27.95	-21.9914
		112	0.219093	112	-2.83267			28	-24.1277	28	-22.6018
		112.2	-1.30679	112.2	-4.05337			28.05	-26.5691	28.05	-21.6863
		112.4	-0.0860831	112.4	-3.13784			28.1	-28.7053	28.1	-20.7707
		112.6	1.74497	112.6	-1.61196			28.15	-27.4846	28.15	-20.1604
		112.8	-1.61196	112.8	-3.13784			28.2	-25.0432	28.2	-19.8552
		113	-1.00161	113	-1.30679			28.25	-22.907	28.25	-21.3811
		113.2	1.4398	113.2	-0.696435			28.3	-22.2966	28.3	-21.9914
		113.4	0.219093	113.4	-2.22231			28.35	-21.0759	28.35	-21.9914
		113.6	1.4398	113.6	-3.44302			28.4	-18.9397	28.4	-21.3811
		113.8	1.4398	113.8	-2.22231			28.45	-17.4138	28.45	-20.7707
		114	-1.00161	114	0.219093			28.5	-17.719	28.5	-21.0759
		114.2	-0.0860831	114.2	-0.696435			28.55	-18.0242	28.55	-21.6863
		114.4	1.74497	114.4	-3.13784			28.6	-18.3293	28.6	-23.2121
		114.6	0.219093	114.6	-4.35854			28.65	-19.8552	28.65	-24.1277
		114.8	-2.22231	114.8	-1.30679			28.7	-22.2966	28.7	-22.907
		115	-0.391259	115	-2.22231			28.75	-23.5173	28.75	-21.9914
		115.2	0.829444	115.2	-1.30679			28.8	-24.1277	28.8	-21.0759
		115.4	2.05015	115.4	0.829444			28.85	-24.1277	28.85	-21.3811
		115.6	0.829444	115.6	-1.30679			28.9	-24.4329	28.9	-20.4656
		115.8	-0.391259	115.8	-2.52749			28.95	-22.907	28.95	-20.1604
		116	-0.0860831	116	-2.52749			29	-20.4656	29	-19.55
		116.2	-2.52749	116.2	-1.30679			29.05	-18.9397	29.05	-20.7707
		116.4	-0.0860831	116.4	-2.22231			29.1	-19.55	29.1	-20.1604
		116.6	0.829444	116.6	-4.66372			29.15	-20.7707	29.15	-19.55
		116.8	0.219093	116.8	-2.83267			29.2	-20.4656	29.2	-20.7707
		117	2.05015	117	-3.13784			29.25	-20.1604	29.25	-20.7707
		117.2	0.219093	117.2	0.219093			29.3	-20.7707	29.3	-19.8552
		117.4	0.219093	117.4	0.524268			29.35	-21.6863	29.35	-19.2449
		117.6	1.13462	117.6	-0.0860831			29.4	-21.9914	29.4	-18.3293
		117.8	2.05015	117.8	-0.391259			29.45	-21.3811	29.45	-19.2449
		118	0.219093	118	-1.91714			29.5	-19.2449	29.5	-20.7707
		118.2	1.74497	118.2	-2.22231			29.55	-17.1086	29.55	-19.55
		118.4	0.829444	118.4	0.219093			29.6	-15.8879	29.6	-18.9397
		118.6	-0.0860831	118.6	0.829444			29.65	-16.1931	29.65	-18.3293
		118.8	2.35532	118.8	-1.30679			29.7	-17.1086	29.7	-18.6345
		119	-0.0860831	119	-1.30679			29.75	-18.0242	29.75	-18.6345
		119.2	0.524268	119.2	-1.91714			29.8	-19.2449	29.8	-18.6345
		119.4	0.829444	119.4	-2.52749			29.85	-18.6345	29.85	-18.9397
		119.6	3.57603	119.6	-0.0860831			29.9	-19.55	29.9	-18.3293
		119.8	0.219093	119.8	-1.00161			29.95	-21.3811	29.95	-19.2449
		120	-0.391259	120	-2.22231			30	-21.6863	30	-21.0759
		120.2	-2.22231	120.2	-1.30679			30.05	-23.5173	30.05	-21.6863
		120.4	-0.391259	120.4	-1.61196			30.1	-25.6536	30.1	-21.3811
		120.6	1.13462	120.6	-2.22231			30.15	-25.9587	30.15	-21.6863
		120.8	-2.83267	120.8	-4.05337			30.2	-26.2639	30.2	-21.9914
		121	2.6605	121	-0.696435			30.25	-26.2639	30.25	-21.9914
		121.2	2.05015	121.2	-1.00161			30.3	-24.4329	30.3	-22.2966
		121.4	-2.22231	121.4	-1.61196			30.35	-21.9914	30.35	-22.907
		121.6	-0.696435	121.6	-3.44302			30.4	-19.55	30.4	-23.2121
		121.8	-0.696435	121.8	-2.22231			30.45	-19.8552	30.45	-23.2121
		122	1.74497	122	-0.0860831			30.5	-20.1604	30.5	-22.907
		122.2	2.6605	122.2	0.524268			30.55	-19.55	30.55	-21.3811
		122.4	0.829444	122.4	-2.52749			30.6	-20.1604	30.6	-20.4656
		122.6	-1.61196	122.6	-1.00161			30.65	-22.2966	30.65	-19.8552
		122.8	-4.35854	122.8	-2.22231			30.7	-22.2966	30.7	-18.9397
		123	1.13462	123	-1.00161			30.75	-22.6018	30.75	-18.0242
		123.2	1.74497	123.2	-4.05337			30.8	-21.9914	30.8	-17.4138
		123.4	0.219093	123.4	-2.22231			30.85	-21.3811	30.85	-16.8035
		123.6	0.829444	123.6	-1.30679			30.9	-22.907	30.9	-16.8035
		123.8	-0.696435	123.8	-5.27407			30.95	-23.5173	30.95	-17.1086
		124	-2.52749	124	-0.696435			31	-23.2121	31	-19.2449
		124.2	1.74497	124.2	1.13462			31.05	-24.4329	31.05	-21.0759
		124.4	0.829444	124.4	-3.13784			31.1	-24.4329	31.1	-21.3811
		124.6	-0.0860831	124.6	-1.91714			31.15	-24.4329	31.15	-22.2966
		124.8	-0.696435	124.8	-2.83267			31.2	-24.738	31.2	-22.907
		125	-1.00161	125	-3.74819			31.25	-24.738	31.25	-22.6018
		125.2	3.27085	125.2	-2.83267			31.3	-24.4329	31.3	-22.907
		125.4	2.96567	125.4	-3.13784			31.35	-23.5173	31.35	-22.2966
		125.6	-1.30679	125.6	-4.05337			31.4	-22.2966	31.4	-20.7707
		125.8	1.4398	125.8	1.13462			31.45	-22.907	31.45	-20.1604
		126	-0.391259	126	-1.91714			31.5	-23.2121	31.5	-19.2449
		126.2	-0.0860831	126.2	-1.91714			31.55	-22.907	31.55	-19.2449
		126.4	-1.00161	126.4	-0.391259			31.6	-22.2966	31.6	-19.8552
		126.6	-0.0860831	126.6	-1.30679			31.65	-23.2121	31.65	-20.7707
		126.8	4.18638	126.8	-0.0860831			31.7	-25.0432	31.7	-22.907
		127	-0.0860831	127	-1.00161			31.75	-25.0432	31.75	-25.0432
		127.2	1.13462	127.2	-1.30679			31.8	-25.9587	31.8	-26.2639
		127.4	1.13462	127.4	0.219093			31.85	-27.1794	31.85	-25.6536
		127.6	-2.83267	127.6	-0.391259			31.9	-26.2639	31.9	-25.0432
		127.8	-0.0860831	127.8	-3.13784			31.95	-25.3484	31.95	-22.907
		128	1.13462	128	-6.49477			32	-25.0432	32	-19.55
		128.2	-1.00161	128.2	-0.0860831			32.05	-23.5173	32.05	-17.719
		128.4	-1.30679	128.4	-0.696435			32.1	-22.2966	32.1	-16.1931
		128.6	0.524268	128.6	-1.00161			32.15	-21.6863	32.15	-14.362
		128.8	-1.00161	128.8	-5.27407			32.2	-20.1604	32.2	-14.362
		129	-0.0860831	129	-2.22231			32.25	-18.0242	32.25	-15.5828
		129.2	2.35532	129.2	-2.83267			32.3	-17.1086	32.3	-16.8035
		129.4	0.219093	129.4	-1.91714			32.35	-17.1086	32.35	-17.1086
		129.6	-0.391259	129.6	-0.696435			32.4	-17.719	32.4	-18.0242
		129.8	3.57603	129.8	-0.696435			32.45	-19.2449	32.45	-19.8552
		130	0.524268	130	-2.83267			32.5	-21.0759	32.5	-22.2966
		130.2	0.829444	130.2	-4.9689			32.55	-21.6863	32.55	-25.0432
		130.4	-0.696435	130.4	-1.00161			32.6	-21.3811	32.6	-27.1794
		130.6	0.524268	130.6	-0.391259			32.65	-22.6018	32.65	-26.5691
		130.8	2.05015	130.8	-0.0860831			32.7	-24.1277	32.7	-25.6536
		131	0.829444	131	-0.391259			32.75	-25.6536	32.75	-25.3484
		131.2	0.829444	131.2	-2.83267			32.8	-27.1794	32.8	-24.4329
		131.4	3.27085	131.4	0.219093			32.85	-26.5691	32.85	-23.5173
		131.6	-0.0860831	131.6	-0.391259			32.9	-25.6536	32.9	-22.2966
		131.8	-1.30679	131.8	-3.44302			32.95	-25.6536	32.95	-22.907
		132	0.829444	132	-4.35854			33	-25.6536	33	-22.907
		132.2	1.4398	132.2	-4.35854			33.05	-25.3484	33.05	-22.2966
		132.4	1.13462	132.4	-2.83267			33.1	-25.6536	33.1	-21.3811
		132.6	1.74497	132.6	-1.61196			33.15	-24.4329	33.15	-21.3811
		132.8	2.35532	132.8	-1.30679			33.2	-23.5173	33.2	-22.6018
		133	0.219093	133	-3.74819			33.25	-21.6863	33.25	-23.2121
		133.2	-1.30679	133.2	-3.74819			33.3	-20.1604	33.3	-24.1277
		133.4	2.05015	133.4	-1.30679			33.35	-19.8552	33.35	-25.0432
		133.6	0.219093	133.6	-1.00161			33.4	-21.0759	33.4	-24.1277
		133.8	1.13462	133.8	-1.30679			33.45	-21.6863	33.45	-22.6018
		134	2.05015	134	-2.52749			33.5	-21.3811	33.5	-21.6863
		134.2	0.219093	134.2	-3.44302			33.55	-21.9914	33.55	-22.6018
		134.4	-0.0860831	134.4	-1.91714			33.6	-22.2966	33.6	-23.2121
		134.6	2.05015	134.6	-1.61196			33.65	-23.5173	33.65	-20.7707
		134.8	1.4398	134.8	-2.83267			33.7	-25.0432	33.7	-21.0759
		135	0.219093	135	-0.696435			33.75	-24.1277	33.75	-21.3811
		135.2	-1.61196	135.2	-1.61196			33.8	-24.1277	33.8	-20.7707
		135.4	-0.696435	135.4	-0.391259			33.85	-23.2121	33.85	-21.6863
		135.6	1.13462	135.6	-1.91714			33.9	-22.2966	33.9	-21.3811
		135.8	2.96567	135.8	-3.74819			33.95	-21.0759	33.95	-19.8552
		136	1.74497	136	0.829444			34	-20.1604	34	-17.719
		136.2	2.05015	136.2	-3.13784			34.05	-21.3811	34.05	-18.0242
		136.4	-0.696435	136.4	-0.391259			34.1	-24.1277	34.1	-18.3293
		136.6	1.74497	136.6	-0.0860831			34.15	-24.738	34.15	-18.3293
		136.8	0.524268	136.8	-1.30679			34.2	-23.5173	34.2	-17.719
		137	-0.0860831	137	-0.0860831			34.25	-22.6018	34.25	-17.719
		137.2	3.57603	137.2	-3.13784			34.3	-22.907	34.3	-17.4138
		137.4	-0.0860831	137.4	-1.30679			34.35	-22.907	34.35	-17.1086
		137.6	0.219093	137.6	-0.0860831			34.4	-22.6018	34.4	-18.6345
		137.8	2.35532	137.8	0.524268			34.45	-22.6018	34.45	-19.2449
		138	3.27085	138	-1.91714			34.5	-23.8225	34.5	-19.2449
		138.2	-0.0860831	138.2	-2.52749			34.55	-24.4329	34.55	-19.55
		138.4	-1.30679	138.4	-0.391259			34.6	-23.2121	34.6	-19.8552
		138.6	2.35532	138.6	-0.391259			34.65	-22.907	34.65	-19.8552
		138.8	0.219093	138.8	1.74497			34.7	-23.2121	34.7	-20.1604
		139	0.829444	139	-3.74819			34.75	-21.6863	34.75	-21.0759
		139.2	-0.0860831	139.2	-1.30679			34.8	-20.4656	34.8	-21.9914
		139.4	-0.391259	139.4	-1.91714			34.85	-19.55	34.85	-21.9914
		139.6	2.6605	139.6	-3.13784			34.9	-18.0242	34.9	-22.2966
		139.8	1.4398	139.8	-2.52749			34.95	-18.6345	34.95	-21.9914
		140	1.74497	140	-0.696435			35	-18.3293	35	-20.1604
		140.2	-2.83267	140.2	-0.696435			35.05	-17.719	35.05	-19.2449
		140.4	1.4398	140.4	-0.0860831			35.1	-17.1086	35.1	-20.4656
		140.6	-1.91714	140.6	-1.00161			35.15	-17.1086	35.15	-21.0759
		140.8	0.219093	140.8	-2.52749			35.2	-19.55	35.2	-21.3811
		141	-0.391259	141	0.524268			35.25	-23.2121	35.25	-21.6863
		141.2	0.829444	141.2	-2.52749			35.3	-25.0432	35.3	-21.0759
		141.4	0.524268	141.4	-0.696435			35.35	-26.8743	35.35	-18.9397
		141.6	1.13462	141.6	-1.61196			35.4	-27.1794	35.4	-18.3293
		141.8	3.57603	141.8	-0.391259			35.45	-26.8743	35.45	-18.9397
		142	0.219093	142	-0.0860831			35.5	-25.9587	35.5	-20.1604
		142.2	-1.30679	142.2	-0.391259			35.55	-25.6536	35.55	-21.6863
		142.4	0.829444	142.4	-3.74819			35.6	-25.6536	35.6	-23.2121
		142.6	0.219093	142.6	-4.9689			35.65	-25.9587	35.65	-23.8225
		142.8	-0.0860831	142.8	-3.44302			35.7	-25.3484	35.7	-24.1277
		143	1.13462	143	-1.91714			35.75	-23.2121	35.75	-23.8225
		143.2	0.829444	143.2	-1.91714			35.8	-20.7707	35.8	-24.4329
		143.4	-1.91714	143.4	-0.391259			35.85	-20.4656	35.85	-25.6536
		143.6	-0.0860831	143.6	-1.91714			35.9	-22.6018	35.9	-26.8743
		143.8	3.8812	143.8	-3.74819			35.95	-25.6536	35.95	-28.095
		144	0.524268	144	-1.30679			36	-27.4846	36	-28.095
		144.2	-0.0860831	144.2	-2.52749			36.05	-29.0105	36.05	-27.4846
		144.4	-0.0860831	144.4	-3.13784			36.1	-28.7053	36.1	-26.8743
		144.6	-0.391259	144.6	0.829444			36.15	-26.5691	36.15	-27.7898
		144.8	-2.22231	144.8	-0.0860831			36.2	-26.5691	36.2	-27.1794
		145	-0.0860831	145	-4.35854			36.25	-25.9587	36.25	-25.9587
		145.2	1.4398	145.2	-2.83267			36.3	-24.4329	36.3	-25.6536
		145.4	-0.0860831	145.4	-0.0860831			36.35	-22.2966	36.35	-23.5173
		145.6	0.524268	145.6	-2.52749			36.4	-21.3811	36.4	-21.0759
		145.8	3.57603	145.8	-2.22231			36.45	-21.9914	36.45	-21.9914
		146	-2.83267	146	-1.91714			36.5	-23.2121	36.5	-22.2966
		146.2	-0.696435	146.2	-2.83267			36.55	-24.738	36.55	-21.0759
		146.4	0.829444	146.4	-1.61196			36.6	-25.3484	36.6	-19.55
		146.6	-0.0860831	146.6	-2.22231			36.65	-24.738	36.65	-18.0242
		146.8	0.585439	146.8	-3.07667			36.7	-23.2121	36.7	-18.9397
		147	-27.3911	147	-9.08054			36.75	-20.7707	36.75	-19.8552
		147.2	14.8041	147.2	-1.98053			36.8	-19.55	36.8	-20.1604
		147.4	14.9412	147.4	2.12377			36.85	-18.9397	36.85	-19.2449
		147.6	5.94781	147.6	3.20123			36.9	-19.8552	36.9	-20.4656
		147.8	1.02127	147.8	-0.50461			36.95	-20.1604	36.95	-20.7707
		148	2.87876	148	-5.66616			37	-20.1604	37	-20.1604
		148.2	3.07383	148.2	-2.41934			37.05	-20.1604	37.05	-19.8552
		148.4	-0.310374	148.4	-0.310374			37.1	-19.55	37.1	-18.9397
		148.6	2.15489	148.6	-0.591694			37.15	-19.8552	37.15	-18.0242
		148.8	2.83213	148.8	-2.96621			37.2	-21.0759	37.2	-19.55
		149	2.32512	149	-0.726642			37.25	-23.5173	37.25	-21.6863
		149.2	0.323096	149.2	1.23862			37.3	-26.8743	37.3	-21.3811
		149.4	1.39898	149.4	-2.26313			37.35	-29.0105	37.35	-20.1604
		149.6	2.49702	149.6	-2.99614			37.4	-29.3157	37.4	-20.1604
		149.8	1.17242	149.8	-5.23627			37.45	-29.926	37.45	-20.4656
		150	-1.05182	150	-0.136294			37.5	-30.5364	37.5	-20.7707
		150.2	1.62021	150.2	-0.210841			37.55	-30.2312	37.55	-22.907
		150.4	1.55707	150.4	-3.02057			37.6	-27.4846	37.6	-23.8225
		150.6	0.893232	150.6	-0.327471			37.65	-23.2121	37.65	-23.8225
		150.8	1.76345	150.8	0.542751			37.7	-21.0759	37.7	-24.1277
		151	2.33543	151	-0.411152			37.75	-19.2449	37.75	-25.0432
		151.2	2.30293	151.2	-0.748833			37.8	-18.9397	37.8	-25.0432
		151.4	0.139161	151.4	-6.57471			37.85	-20.1604	37.85	-24.1277
		151.6	1.03137	151.6	-2.02039			37.9	-20.7707	37.9	-23.2121
		151.8	2.23232	151.8	0.0960847			37.95	-21.0759	37.95	-23.2121
		152	2.21558	152	-1.14135			38	-21.9914	38	-24.4329
		152.2	-1.76588	152.2	0.370354			38.05	-22.907	38.05	-25.3484
		152.4	2.79975	152.4	-2.08306			38.1	-22.6018	38.1	-25.6536
		152.6	3.39994	152.6	-2.3984			38.15	-23.2121	38.15	-23.8225
		152.8	0.644741	152.8	-1.79667			38.2	-24.4329	38.2	-21.6863
		153	0.637445	153	-3.02466			38.25	-24.4329	38.25	-19.8552
		153.2	3.07267	153.2	-2.42049			38.3	-23.5173	38.3	-18.9397
		153.4	0.62603	153.4	-1.81538			38.35	-22.907	38.35	-18.9397
		153.6	-0.904283	153.6	-0.599107			38.4	-23.2121	38.4	-20.4656
		153.8	2.75407	153.8	0.923016			38.45	-21.3811	38.45	-21.0759
		154	1.53019	154	-3.04745			38.5	-20.4656	38.5	-21.6863
		154.2	2.13784	154.2	-2.43979			38.55	-17.719	38.55	-21.6863
		154.4	-0.611022	154.4	-0.611022			38.6	-15.8879	38.6	-21.6863
		154.6	0.607748	154.6	1.2181			38.65	-16.4983	38.65	-21.0759
		154.8	1.82681	154.8	-0.309418			38.7	-16.8035	38.7	-21.3811
		155	0.299547	155	-4.27809			38.75	-16.8035	38.75	-21.0759
		155.2	0.603548	155.2	-0.922331			38.8	-17.1086	38.8	-19.8552
		155.4	2.43361	155.4	-2.44921			38.85	-19.2449	38.85	-19.2449
		155.6	0.601709	155.6	-2.45005			38.9	-21.9914	38.9	-18.3293
		155.8	-2.14559	155.8	-2.14559			38.95	-25.0432	38.95	-18.0242
		156	-1.84102	156	-2.75654			39	-27.1794	39	-18.0242
		156.2	1.82058	156.2	-1.53635			39.05	-27.7898	39.05	-18.6345
		156.4	2.4305	156.4	-0.621259			39.1	-27.1794	39.1	-18.3293
		156.6	0.904252	156.6	-0.0112753			39.15	-26.2639	39.15	-17.1086
		156.8	-1.53747	156.8	0.598765			39.2	-24.738	39.2	-16.8035
		157	-1.84291	157	-0.317026			39.25	-22.907	39.25	-16.8035
		157.2	0.598278	157.2	-3.36901			39.3	-21.0759	39.3	-17.4138
		157.4	-2.75884	157.4	-3.97955			39.35	-21.3811	39.35	-18.9397
		157.6	0.292752	157.6	-3.36936			39.4	-20.4656	39.4	-20.4656
		157.8	0.902968	157.8	-3.36949			39.45	-20.1604	39.45	-21.6863
		158	2.42873	158	-3.97996			39.5	-21.0759	39.5	-24.1277
		158.2	0.59758	158.2	-2.45418			39.55	-22.6018	39.55	-25.3484
		158.4	0.597497	158.4	-1.23356			39.6	-24.738	39.6	-25.6536
		158.6	-1.23363	158.6	-1.23363			39.65	-25.3484	39.65	-26.2639
		158.8	-0.623335	158.8	-0.318159			39.7	-25.3484	39.7	-26.2639
		159	-0.318209	159	-0.0130333			39.75	-25.3484	39.75	-25.6536
		159.2	-0.623427	159.2	-1.23378			39.8	-23.5173	39.8	-25.3484
		159.4	0.59724	159.4	-3.06487			39.85	-21.0759	39.85	-24.1277
		159.6	-1.53902	159.6	-0.623494			39.9	-18.9397	39.9	-21.6863
		159.8	0.597183	159.8	-1.84422			39.95	-16.4983	39.95	-21.3811
		160	2.42822	160	-1.84424			40	-16.1931	40	-22.6018
		160.2	0.291967	160.2	-3.67532			40.05	-17.719	40.05	-22.6018
		160.4	1.20748	160.4	-3.37016			40.1	-18.9397	40.1	-22.907
		160.6	-0.0132374	160.6	-0.928765			40.15	-18.6345	40.15	-22.6018
		160.8	-1.53913	160.8	-1.23395			40.2	-18.0242	40.2	-22.6018
		161	0.902269	161	-3.67537			40.25	-17.1086	40.25	-23.2121
		161.2	-0.623618	161.2	-1.23397			40.3	-17.1086	40.3	-21.6863
		161.4	-0.9288	161.4	-1.53915			40.35	-17.719	40.35	-20.7707
		161.6	1.81778	161.6	-0.928806			40.4	-18.3293	40.4	-21.0759
		161.8	0.902243	161.8	-2.75987			40.45	-19.2449	40.45	-21.6863
		162	-0.623639	162	-1.84434			40.5	-20.7707	40.5	-21.6863
		162.2	0.902236	162.2	-3.06505			40.55	-21.6863	40.55	-21.0759
		162.4	3.64881	162.4	-4.59093			40.6	-21.9914	40.6	-20.1604
		162.6	0.291879	162.6	-0.928824			40.65	-22.6018	40.65	-21.9914
		162.8	-1.53918	162.8	-0.0132991			40.7	-23.8225	40.7	-21.9914
		163	0.597051	163	-2.45471			40.75	-25.0432	40.75	-20.4656
		163.2	2.12293	163.2	-4.28576			40.8	-25.3484	40.8	-19.55
		163.4	-0.623655	163.4	-1.53918			40.85	-25.0432	40.85	-21.6863
		163.6	1.51257	163.6	-2.14954			40.9	-24.738	40.9	-23.5173
		163.8	-1.53918	163.8	-2.14954			40.95	-24.4329	40.95	-24.1277
		164	2.4281	164	-2.45471			41	-24.4329	41	-24.1277
		164.2	-0.318483	164.2	-1.53919			41.05	-23.5173	41.05	-25.3484
		164.4	0.597044	164.4	-1.53919			41.1	-21.0759	41.1	-26.2639
		164.6	-0.928836	164.6	0.597043			41.15	-19.8552	41.15	-26.5691
		164.8	0.291867	164.8	0.902219			41.2	-19.2449	41.2	-25.6536
		165	0.597042	165	-1.53919			41.25	-18.6345	41.25	-25.3484
		165.2	2.73327	165.2	-2.45472			41.3	-19.55	41.3	-24.738
		165.4	0.291866	165.4	-2.14954			41.35	-20.7707	41.35	-21.9914
		165.6	0.597042	165.6	-1.53919			41.4	-22.2966	41.4	-20.1604
		165.8	1.81774	165.8	-1.84436			41.45	-24.1277	41.45	-17.719
		166	-0.623662	166	1.51257			41.5	-24.1277	41.5	-15.5828
		166.2	-0.318486	166.2	0.597041			41.55	-22.907	41.55	-14.6672
		166.4	3.03845	166.4	-2.45472			41.6	-22.907	41.6	-16.4983
		166.6	0.597041	166.6	-0.928838			41.65	-22.2966	41.65	-18.3293
		166.8	-2.75989	166.8	-2.45472			41.7	-20.7707	41.7	-19.55
		167	0.597041	167	-1.53919			41.75	-19.55	41.75	-18.0242
		167.2	3.6488	167.2	-1.23401			41.8	-19.2449	41.8	-16.8035
		167.4	1.20739	167.4	-1.84437			41.85	-18.0242	41.85	-17.1086
		167.6	0.902217	167.6	-1.23401			41.9	-18.9397	41.9	-17.1086
		167.8	0.291865	167.8	-1.84437			41.95	-19.8552	41.95	-17.1086
		168	-0.0133108	168	-3.06507			42	-20.4656	42	-16.8035
		168.2	0.597041	168.2	0.902216			42.05	-21.0759	42.05	-16.8035
		168.4	2.73327	168.4	-3.06507			42.1	-21.6863	42.1	-17.719
		168.6	0.597041	168.6	-2.14954			42.15	-22.2966	42.15	-18.0242
		168.8	-0.0133109	168.8	0.597041			42.2	-22.907	42.2	-18.0242
		169	-0.0133109	169	-0.0133109			42.25	-24.1277	42.25	-18.0242
		169.2	1.51257	169.2	-1.23401			42.3	-24.4329	42.3	-17.1086
		169.4	2.12292	169.4	-3.06507			42.35	-21.9914	42.35	-16.1931
		169.6	-0.318487	169.6	-2.14954			42.4	-18.9397	42.4	-16.8035
		169.8	2.12292	169.8	-0.928838			42.45	-16.8035	42.45	-19.55
		170	0.597041	170	-0.623662			42.5	-15.5828	42.5	-21.6863
		170.2	-0.318487	170.2	-0.318487			42.55	-15.2776	42.55	-21.9914
		170.4	1.51257	170.4	0.291865			42.6	-16.8035	42.6	-22.907
		170.6	3.03845	170.6	-0.318487			42.65	-18.3293	42.65	-23.2121
		170.8	-2.14954	170.8	-2.75989			42.7	-20.4656	42.7	-23.2121
		171	1.20739	171	-1.53919			42.75	-21.3811	42.75	-22.6018
		171.2	1.51257	171.2	-0.623663			42.8	-22.907	42.8	-21.0759
		171.4	0.902216	171.4	-0.623663			42.85	-24.1277	42.85	-19.8552
		171.6	-0.013311	171.6	-1.53919			42.9	-24.4329	42.9	-19.2449
		171.8	-1.53919	171.8	-1.23401			42.95	-23.8225	42.95	-18.3293
		172	2.12292	172	-3.9806			43	-22.2966	43	-19.2449
		172.2	-1.53919	172.2	-1.53919			43.05	-21.9914	43.05	-21.3811
		172.4	-0.013311	172.4	2.12292			43.1	-21.9914	43.1	-23.2121
		172.6	0.597041	172.6	-0.623663			43.15	-21.6863	43.15	-24.1277
		172.8	-0.928838	172.8	-1.84437			43.2	-20.1604	43.2	-24.4329
		173	-1.23401	173	-2.45472			43.25	-19.8552	43.25	-23.2121
		173.2	-0.928838	173.2	-2.14954			43.3	-21.0759	43.3	-22.2966
		173.4	0.902216	173.4	-0.623663			43.35	-21.3811	43.35	-21.3811
		173.6	1.51257	173.6	-1.84437			43.4	-21.9914	43.4	-22.6018
		173.8	0.597041	173.8	-0.318487			43.45	-23.5173	43.45	-24.1277
		174	0.597041	174	-0.623663			43.5	-23.8225	43.5	-24.4329
		174.2	0.597041	174.2	-0.623663			43.55	-22.907	43.55	-23.2121
		174.4	0.291865	174.4	-0.928838			43.6	-22.6018	43.6	-23.2121
		174.6	-1.23401	174.6	-1.84437			43.65	-21.3811	43.65	-24.4329
		174.8	1.51257	174.8	-5.50647			43.7	-19.8552	43.7	-24.4329
		175	-1.53919	175	-0.623663			43.75	-19.2449	43.75	-23.2121
		175.2	3.03845	175.2	-0.928838			43.8	-20.4656	43.8	-21.9914
		175.4	0.597041	175.4	-0.623663			43.85	-20.4656	43.85	-20.7707
		175.6	-2.45472	175.6	0.597041			43.9	-19.55	43.9	-21.0759
		175.8	2.12292	175.8	-1.84437			43.95	-19.8552	43.95	-21.9914
		176	0.902216	176	-3.37024			44	-20.1604	44	-21.6863
		176.2	0.291865	176.2	-1.84437			44.05	-18.9397	44.05	-21.9914
		176.4	0.597041	176.4	-2.45472			44.1	-17.4138	44.1	-22.2966
		176.6	0.291865	176.6	-1.84437			44.15	-17.719	44.15	-21.9914
		176.8	0.597041	176.8	-2.75989			44.2	-18.9397	44.2	-21.3811
		177	-0.013311	177	0.597041			44.25	-21.3811	44.25	-19.8552
		177.2	0.597041	177.2	-2.14954			44.3	-21.6863	44.3	-17.4138
		177.4	0.597041	177.4	-3.06507			44.35	-21.0759	44.35	-15.5828
		177.6	3.34362	177.6	-3.37024			44.4	-21.3811	44.4	-14.6672
		177.8	4.56433	177.8	-4.28577			44.45	-20.1604	44.45	-14.0569
		178	-1.23401	178	-1.84437			44.5	-17.4138	44.5	-14.362
		178.2	0.597041	178.2	-4.89612			44.55	-18.6345	44.55	-14.9724
		178.4	-1.53919	178.4	-3.37024			44.6	-19.8552	44.6	-15.2776
		178.6	-2.14954	178.6	-3.06507			44.65	-20.4656	44.65	-15.8879
		178.8	0.291865	178.8	-0.013311			44.7	-20.1604	44.7	-16.1931
		179	-0.013311	179	-2.14954			44.75	-19.55	44.75	-17.1086
		179.2	0.597041	179.2	-3.06507			44.8	-20.1604	44.8	-18.3293
		179.4	-0.623663	179.4	-1.53919			44.85	-19.55	44.85	-20.1604
		179.6	-1.23401	179.6	0.597041			44.9	-19.2449	44.9	-21.6863
		179.8	0.291865	179.8	-4.89612			44.95	-18.0242	44.95	-20.4656
		180	2.12292	180	-3.9806			45	-18.0242	45	-22.2966
		180.2	0.291865	180.2	-0.318487			45.05	-20.1604	45.05	-24.738
		180.4	-0.623663	180.4	-0.013311			45.1	-21.9914	45.1	-25.3484
		180.6	-2.45472	180.6	-2.45472			45.15	-23.2121	45.15	-24.4329
		180.8	1.20739	180.8	-0.318487			45.2	-23.8225	45.2	-22.907
		181	0.597041	181	-0.013311			45.25	-23.8225	45.25	-22.6018
		181.2	0.597041	181.2	-2.14954			45.3	-23.8225	45.3	-24.1277
		181.4	-1.53919	181.4	0.291865			45.35	-23.8225	45.35	-22.907
		181.6	2.12292	181.6	-0.013311			45.4	-22.907	45.4	-21.0759
		181.8	1.51257	181.8	-3.9806			45.45	-22.6018	45.45	-21.3811
		182	1.20739	182	-0.318487			45.5	-22.907	45.5	-22.6018
		182.2	-0.013311	182.2	-0.928838			45.55	-22.907	45.55	-22.6018
		182.4	2.73327	182.4	-0.928838			45.6	-21.9914	45.6	-21.3811
		182.6	0.597041	182.6	-1.84437			45.65	-21.0759	45.65	-20.7707
		182.8	5.17468	182.8	-0.928838			45.7	-21.3811	45.7	-20.1604
		183	2.4281	183	0.291865			45.75	-22.907	45.75	-18.6345
		183.2	3.03845	183.2	-1.53919			45.8	-23.8225	45.8	-17.719
		183.4	0.597041	183.4	-2.14954			45.85	-23.5173	45.85	-17.719
		183.6	0.597041	183.6	-1.23401			45.9	-23.2121	45.9	-18.3293
		183.8	1.51257	183.8	0.902216			45.95	-23.5173	45.95	-19.55
		184	3.34362	184	0.597041			46	-24.1277	46	-21.3811
		184.2	1.51257	184.2	-0.013311			46.05	-23.5173	46.05	-22.2966
		184.4	2.12292	184.4	0.291865			46.1	-22.2966	46.1	-23.2121
		184.6	1.81774	184.6	-2.45472			46.15	-21.6863	46.15	-23.2121
		184.8	-0.013311	184.8	-1.53919			46.2	-20.4656	46.2	-22.907
		185	-2.45472	185	-0.013311			46.25	-19.2449	46.25	-23.2121
		185.2	-0.013311	185.2	-0.623663			46.3	-18.3293	46.3	-21.6863
		185.4	2.4281	185.4	-3.9806			46.35	-19.55	46.35	-20.7707
		185.6	2.4281	185.6	-1.84437			46.4	-22.907	46.4	-20.1604
		185.8	0.597041	185.8	-0.623663			46.45	-25.6536	46.45	-19.8552
		186	1.20739	186	-0.013311			46.5	-26.5691	46.5	-20.1604
		186.2	0.902216	186.2	-0.928838			46.55	-25.6536	46.55	-19.8552
		186.4	-0.623663	186.4	-2.14954			46.6	-25.0432	46.6	-19.55
		186.6	1.51257	186.6	-0.013311			46.65	-24.4329	46.65	-20.1604
		186.8	0.597041	186.8	-1.23401			46.7	-23.5173	46.7	-21.3811
		187	-0.013311	187	-1.23401			46.75	-23.2121	46.75	-20.7707
		187.2	3.6488	187.2	-0.928838			46.8	-21.6863	46.8	-19.8552
		187.4	0.291865	187.4	0.291865			46.85	-19.3567	46.85	-19.6619
		187.6	1.81774	187.6	-0.318487			46.9	-597.054	46.9	-598.275
		187.8	0.291865	187.8	-0.623663			46.95	-2217.44	46.95	-2217.74
		188	0.597041	188	1.20739			47	-2848.44	47	-2847.83
		188.2	0.597041	188.2	-2.14954			47.05	-2554.15	47.05	-2552.32
		188.4	0.902216	188.4	-0.318487			47.1	-1882.56	47.1	-1879.81
		188.6	-1.84437	188.6	-1.53919			47.15	-1129.48	47.15	-1124.3
		188.8	2.12292	188.8	-1.53919			47.2	-432.26	47.2	-424.935
		189	0.597041	189	0.597041			47.25	152.05	47.25	161.206
		189.2	-0.013311	189.2	1.51257			47.3	608.898	47.3	618.969
		189.4	0.902216	189.4	2.12292			47.35	931.673	47.35	941.438
		189.6	3.03845	189.6	0.597041			47.4	1123.93	47.4	1133.09
		189.8	-1.84437	189.8	-2.75989			47.45	1199.92	47.45	1205.72
		190	-1.23401	190	-1.23401			47.5	1184.56	47.5	1188.22
		190.2	-1.23401	190.2	-2.14954			47.55	1105.93	47.55	1108.98
		190.4	4.56433	190.4	-3.06507			47.6	990.47	47.6	992.301
		190.6	0.902216	190.6	0.291865			47.65	859.346	47.65	859.346
		190.8	0.291865	190.8	-0.928838			47.7	725.679	47.7	726.289
		191	-1.53919	191	0.291865			47.75	589.978	47.75	592.419
		191.2	1.20739	191.2	-0.318487			47.8	465.873	47.8	468.314
		191.4	0.902216	191.4	-1.23401			47.85	359.366	47.85	359.672
		191.6	-1.23401	191.6	-0.928838			47.9	267.305	47.9	265.169
		191.8	0.597041	191.8	-0.013311			47.95	186.84	47.95	183.789
		192	0.902216	192	-1.23401			48	124.483	48	122.957
		192.2	0.902216	192.2	-5.2013			48.05	77.9944	48.05	76.4685
		192.4	0.291865	192.4	-1.84437			48.1	43.3306	48.1	42.4151
		192.6	-0.928838	192.6	-1.84437			48.15	11.1009	48.15	11.1009
		192.8	-0.623663	192.8	-1.23401			48.2	2.64881	48.2	2.03846
		193	0.902216	193	-0.318487			48.25	1.78166	48.25	-1.27009
		193.2	-0.623663	193.2	-1.23401			48.3	2.46502	48.3	-3.02814
		193.4	-0.013311	193.4	-2.45472			48.35	2.32614	48.35	-3.16702
		193.6	-0.318487	193.6	-0.623663			48.4	2.2901	48.4	-2.89789
		193.8	1.20739	193.8	0.597041			48.45	1.67035	48.45	-2.90729
		194	-1.23401	194	-4.89612			48.5	-0.163162	48.5	-1.68904
		194.2	-1.23401	194.2	-2.45472			48.55	-3.21556	48.55	-0.774158
		194.4	0.291865	194.4	-3.37024			48.6	-5.35197	48.6	-0.163977
		194.6	1.51257	194.6	-1.84437			48.65	-7.48824	48.65	1.36186
		194.8	-0.318487	194.8	-3.37024			48.7	-8.40378	48.7	4.10843
		195	-0.318487	195	-2.14954			48.75	-8.09861	48.75	5.93948
		195.2	1.20739	195.2	-0.013311			48.8	-8.09861	48.8	6.855
		195.4	-0.013311	195.4	-2.45472			48.85	-7.18308	48.85	5.93948
		195.6	-0.928838	195.6	-3.37024			48.9	-6.26755	48.9	4.71877
		195.8	2.12292	195.8	-0.928838			48.95	-4.4365	48.95	2.88772
		196	-0.623663	196	-2.14954			49	-2.60544	49	1.66702
		196.2	1.51257	196.2	-3.67542			49.05	0.141137	49.05	1.36184
		196.4	0.597041	196.4	-0.928838			49.1	2.27737	49.1	-0.164038
		196.6	0.291865	196.6	0.291865			49.15	2.58254	49.15	-0.164038
		196.8	0.230694	196.8	-0.0744818			49.2	1.05666	49.2	1.05666
		197	30.0383	197	5.62421			49.25	-0.469214	49.25	2.27737
		197.2	-9.71554	197.2	-2.6965			49.3	-2.30027	49.3	3.1929
		197.4	-9.54739	197.4	-6.19045			49.35	-3.2158	49.35	3.49807
		197.6	-4.8265	197.6	-2.3851			49.4	-3.2158	49.4	2.58254
		197.8	-2.34137	197.8	-2.03619			49.45	-4.4365	49.45	1.97219
		198	0.378777	198	-0.231575			49.5	-4.4365	49.5	0.751489
		198.2	1.70959	198.2	-2.25769			49.55	-3.2158	49.55	-0.469214
		198.4	-0.399372	198.4	-1.3149			49.6	-2.30027	49.6	-1.38474
		198.6	5.06994	198.6	-1.64393			49.65	-1.99509	49.65	-1.99509
		198.8	6.8341	198.8	0.42541			49.7	-0.77439	49.7	-2.60544
		199	2.76348	199	-0.288279			49.75	-0.164038	49.75	-2.30027
		199.2	0.798213	199.2	0.493038			49.8	-0.164038	49.8	-1.99509
		199.4	1.2482	199.4	0.637852			49.85	-1.07957	49.85	-0.77439
		199.6	1.98122	199.6	-1.68089			49.9	-2.60544	49.9	-0.469214
		199.8	2.08512	199.8	-2.79769			49.95	-3.82615	49.95	-0.77439
		200	2.17313	200	-1.79416			50	-3.82615	50	-0.164038
		200.2	2.55285	200.2	1.33215			50.05	-2.60544	50.05	0.751489
		200.4	1.39529	200.4	1.70047			50.1	-1.38474	50.1	1.97219
		200.6	0.228077	200.6	-0.382274			50.15	-0.77439	50.15	2.27737
		200.8	2.40961	200.8	-2.4732			50.2	-1.38474	50.2	2.58254
		201	2.75316	201	-0.60377			50.25	-1.99509	50.25	1.97219
		201.2	3.39602	201.2	-0.87644			50.3	-1.68992	50.3	1.66702
		201.4	1.5925	201.4	-0.238555			50.35	-2.30027	50.35	-0.469214
		201.6	2.83652	201.6	0.395118			50.4	-3.52097	50.4	-1.07957
		201.8	1.94075	201.8	-0.195479			50.45	-3.52097	50.45	-1.38474
		202	2.26266	202	0.736781			50.5	-3.52097	50.5	-1.68992
		202.2	-0.164572	202.2	-0.164572			50.55	-2.30027	50.55	-2.91062
		202.4	1.98366	202.4	1.06814			50.6	-1.99509	50.6	-3.52097
		202.6	1.68866	202.6	0.162778			50.65	-2.30027	50.65	-2.91062
		202.8	2.30762	202.8	-3.49072			50.7	-1.68992	50.7	-2.91062
		203	1.39939	203	-0.431663			50.75	-1.38474	50.75	-2.60544
		203.2	1.71075	203.2	1.1004			50.8	-1.68992	50.8	-2.60544
		203.4	2.32633	203.4	1.10563			50.85	-1.99509	50.85	-1.68992
		203.6	1.72042	203.6	-0.110638			50.9	-3.52097	50.9	-0.469214
		203.8	0.503469	203.8	-0.412058			50.95	-3.52097	50.95	0.446313
		204	4.47394	204	-2.54511			51	-2.60544	51	0.141137
		204.2	2.64558	204.2	-0.101006			51.05	-1.68992	51.05	-0.164038
		204.4	3.25821	204.4	2.03751			51.1	-2.30027	51.1	0.141137
		204.6	3.26014	204.6	0.513561			51.15	-2.60544	51.15	-0.77439
		204.8	0.210023	204.8	0.515199			51.2	-0.77439	51.2	-2.30027
		205	1.73729	205	-0.398941			51.25	0.446313	51.25	-4.4365
		205.2	2.04364	205.2	-1.00812			51.3	1.66702	51.3	-4.4365
		205.4	2.96016	205.4	-0.0915948			51.35	3.80325	51.35	-3.82615
		205.6	2.65583	205.6	0.214424			51.4	2.88772	51.4	-4.4365
		205.8	1.43584	205.8	-0.700389			51.45	0.751489	51.45	-3.82615
		206	5.09856	206	-1.31014			51.5	-0.164038	51.5	-3.52097
		206.2	2.04731	206.2	-0.699272			51.55	-0.469214	51.55	-3.52097
		206.4	0.216689	206.4	-1.00401			51.6	-1.38474	51.6	-3.52097
		206.6	-0.393295	206.6	-2.8347			51.65	-2.30027	51.65	-1.99509
		206.8	2.96395	206.8	1.43807			51.7	-2.60544	51.7	-0.77439
		207	1.43834	207	-0.392719			51.75	-2.91062	51.75	0.751489
		207.2	-0.392496	207.2	0.523031			51.8	-1.07957	51.8	1.66702
		207.4	-0.0871311	207.4	-0.0871311			51.85	0.446313	51.85	1.05666
		207.6	2.65961	207.6	-1.0025			51.9	1.05666	51.9	0.141137
		207.8	0.218341	207.8	-0.697187			51.95	-1.07957	51.95	0.446313
		208	-1.30742	208	-0.08672			52	-3.82615	52	0.751489
		208.2	1.13408	208.2	-1.30733			52.05	-4.74167	52.05	1.05666
		208.4	2.66004	208.4	-2.52795			52.1	-3.52097	52.1	1.66702
		208.6	0.523881	208.6	-1.002			52.15	-2.91062	52.15	1.05666
		208.8	-0.086411	208.8	-0.696762			52.2	-1.38474	52.2	-0.469214
		209	2.35505	209	-0.391537			52.25	0.141137	52.25	-1.99509
		209.2	2.66026	209.2	-1.30702			52.3	1.05666	52.3	-2.30027
		209.4	0.524069	209.4	-2.83286			52.35	2.58254	52.35	-0.77439
		209.6	-1.91731	209.6	-0.696603			52.4	1.36184	52.4	-0.469214
		209.8	-0.391402	209.8	-3.13798			52.45	-0.469214	52.45	0.446313
		210	0.829323	210	-1.61208			52.5	-1.07957	52.5	0.751489
		210.2	-0.0861857	210.2	-0.391361			52.55	-1.38474	52.55	0.751489
		210.4	0.829357	210.4	-1.30687			52.6	-0.164038	52.6	0.446313
		210.6	1.13455	210.6	-0.391332			52.65	1.66702	52.65	-0.164038
		210.8	-0.391321	210.8	-1.30685			52.7	2.58254	52.7	-0.77439
		211	-0.0861359	211	-1.30684			52.75	1.97219	52.75	-1.07957
		211.2	2.0501	211.2	-2.52753			52.8	1.36184	52.8	-1.07957
		211.4	1.74493	211.4	-4.96893			52.85	-0.77439	52.85	-1.99509
		211.6	1.13459	211.6	-2.52752			52.9	-1.07957	52.9	-3.82615
		211.8	-1.61199	211.8	-1.61199			52.95	0.141137	52.95	-3.52097
		212	1.43977	212	-2.83269			53	-0.164038	53	-2.91062
		212.2	1.43978	212.2	-1.61198			53.05	-0.469214	53.05	-3.52097
		212.4	0.219076	212.4	-0.391275			53.1	-0.164038	53.1	-2.91062
		212.6	0.219079	212.6	-0.0860971			53.15	1.05666	53.15	-2.91062
		212.8	0.219081	212.8	-2.22233			53.2	1.05666	53.2	-3.2158
		213	2.66049	213	-1.61197			53.25	-0.77439	53.25	-1.99509
		213.2	-1.30679	213.2	-3.44303			53.3	-3.52097	53.3	-0.77439
		213.4	1.43979	213.4	-1.61197			53.35	-4.13132	53.35	1.05666
		213.6	1.43979	213.6	-1.00162			53.4	-3.82615	53.4	1.97219
		213.8	3.8812	213.8	-3.7482			53.45	-3.82615	53.45	2.27737
		214	2.96567	214	-2.22232			53.5	-3.52097	53.5	2.27737
		214.2	-0.391263	214.2	-0.696438			53.55	-3.2158	53.55	-0.164038
		214.4	-0.0860863	214.4	0.21909			53.6	-4.74167	53.6	-2.60544
		214.6	2.05014	214.6	-1.30679			53.65	-3.82615	53.65	-4.4365
		214.8	1.43979	214.8	-2.22232			53.7	-1.68992	53.7	-5.6572
		215	1.13462	215	-2.52749			53.75	-1.07957	53.75	-4.4365
		215.2	4.18638	215.2	-1.91714			53.8	0.141137	53.8	-4.13132
		215.4	2.35532	215.4	-2.22231			53.85	1.36184	53.85	-4.13132
		215.6	0.524267	215.6	-0.696436			53.9	1.36184	53.9	-4.4365
		215.8	2.35532	215.8	-3.74819			53.95	0.446313	53.95	-3.52097
		216	3.27085	216	-0.086084			54	-0.164038	54	-3.2158
		216.2	-0.0860838	216.2	-0.39126			54.05	-0.164038	54.05	-1.38474
		216.4	1.74497	216.4	-1.61196			54.1	-1.07957	54.1	1.66702
		216.6	0.524268	216.6	-0.0860836			54.15	-0.77439	54.15	2.27737
		216.8	2.35532	216.8	-0.696435			54.2	-1.38474	54.2	0.446313
		217	2.35532	217	-1.61196			54.25	-1.99509	54.25	-0.77439
		217.2	-0.0860834	217.2	-0.0860834			54.3	-4.13132	54.3	-0.164038
		217.4	0.524268	217.4	0.829444			54.35	-5.35203	54.35	0.446313
		217.6	1.74497	217.6	-0.696435			54.4	-4.13132	54.4	0.751489
		217.8	2.35532	217.8	-0.391259			54.45	-1.99509	54.45	-0.469214
		218	2.05015	218	-1.00161			54.5	-2.30027	54.5	-0.164038
		218.2	2.96567	218.2	-0.391259			54.55	-3.2158	54.55	1.66702
		218.4	1.13462	218.4	-2.52749			54.6	-3.2158	54.6	1.97219
		218.6	1.74497	218.6	1.4398			54.65	-4.13132	54.65	2.88772
		218.8	2.6605	218.8	1.74497			54.7	-5.04685	54.7	2.88772
		219	5.40708	219	-1.91714			54.75	-5.6572	54.75	2.27737
		219.2	1.74497	219.2	-1.00161			54.8	-5.6572	54.8	1.66702
		219.4	2.96567	219.4	-2.22231			54.85	-4.74167	54.85	0.446313
		219.6	-0.0860832	219.6	-1.30679			54.9	-3.82615	54.9	-0.469214
		219.8	2.6605	219.8	0.219093			54.95	-1.07957	54.95	-2.30027
		220	2.35532	220	-0.0860832			55	0.141137	55	-3.2158
		220.2	2.96567	220.2	-0.0860831			55.05	0.446313	55.05	-3.82615
		220.4	1.4398	220.4	-0.696435			55.1	0.141137	55.1	-4.74167
		220.6	0.524268	220.6	-1.91714			55.15	-0.164038	55.15	-5.35203
		220.8	2.96567	220.8	0.524268			55.2	0.141137	55.2	-4.74167
		221	2.05015	221	-0.0860831			55.25	-0.77439	55.25	-3.2158
		221.2	4.18638	221.2	-2.22231			55.3	-1.99509	55.3	-1.68992
		221.4	1.74497	221.4	-0.391259			55.35	-2.91062	55.35	-1.68992
		221.6	-0.391259	221.6	-0.391259			55.4	-2.60544	55.4	0.141137
		221.8	-0.0860831	221.8	-1.30679			55.45	0.141137	55.45	1.66702
		222	3.27085	222	-0.696435			55.5	1.97219	55.5	1.97219
		222.2	0.524268	222.2	0.524268			55.55	2.58254	55.55	1.36184
		222.4	0.829444	222.4	-3.44302			55.6	2.88772	55.6	0.446313
		222.6	2.6605	222.6	-2.83267			55.65	1.05666	55.65	-0.77439
		222.8	3.57603	222.8	-0.391259			55.7	-0.469214	55.7	-2.60544
		223	0.829444	223	0.219093			55.75	-2.30027	55.75	-2.91062
		223.2	-0.391259	223.2	-1.00161			55.8	-1.38474	55.8	-2.30027
		223.4	2.05015	223.4	-2.83267			55.85	-0.164038	55.85	-1.99509
		223.6	-0.0860831	223.6	-1.61196			55.9	-1.68992	55.9	-2.60544
		223.8	0.829444	223.8	-0.0860831			55.95	-3.52097	55.95	-3.52097
		224	2.05015	224	-0.391259			56	-3.2158	56	-5.04685
		224.2	1.74497	224.2	-0.696435			56.05	-2.30027	56.05	-4.13132
		224.4	0.829444	224.4	-2.22231			56.1	-2.30027	56.1	-3.52097
		224.6	-0.696435	224.6	-2.22231			56.15	-1.38474	56.15	-2.91062
		224.8	3.57603	224.8	-2.22231			56.2	0.751489	56.2	-1.68992
		225	-0.0860831	225	1.13462			56.25	1.36184	56.25	0.141137
		225.2	1.4398	225.2	-1.91714			56.3	0.751489	56.3	1.66702
		225.4	0.524268	225.4	-3.74819			56.35	-1.07957	56.35	2.88772
		225.6	-0.0860831	225.6	-2.52749			56.4	-4.13132	56.4	2.58254
		225.8	-0.0860831	225.8	1.74497			56.45	-6.57273	56.45	1.97219
		226	2.35532	226	-1.61196			56.5	-7.18308	56.5	1.36184
		226.2	2.05015	226.2	-3.13784			56.55	-6.26755	56.55	1.36184
		226.4	0.219093	226.4	-0.391259			56.6	-4.4365	56.6	1.36184
		226.6	0.219093	226.6	-3.13784			56.65	-2.30027	56.65	1.66702
		226.8	-1.61196	226.8	-1.00161			56.7	-1.07957	56.7	2.27737
		227	-1.91714	227	-2.22231			56.75	0.141137	56.75	0.751489
		227.2	0.829444	227.2	-1.91714			56.8	1.66702	56.8	1.36184
		227.4	0.219093	227.4	-1.30679			56.85	2.88772	56.85	3.1929
		227.6	-0.391259	227.6	-0.391259			56.9	3.49807	56.9	4.10842
		227.8	-2.52749	227.8	-0.0860831			56.95	2.27737	56.95	2.88772
		228	-0.0860831	228	-2.22231			57	-0.164038	57	1.05666
		228.2	-0.696435	228.2	-1.91714			57.05	-1.38474	57.05	-0.469214
		228.4	0.829444	228.4	-3.44302			57.1	-1.38474	57.1	-0.77439
		228.6	1.13462	228.6	-1.91714			57.15	0.141137	57.15	-1.68992
		228.8	-1.91714	228.8	-0.391259			57.2	1.05666	57.2	-2.60544
		229	0.219093	229	-0.0860831			57.25	-0.77439	57.25	-2.30027
		229.2	1.13462	229.2	-1.00161			57.3	-2.60544	57.3	-1.38474
		229.4	1.13462	229.4	-1.61196			57.35	-1.38474	57.35	0.751489
		229.6	1.74497	229.6	-6.79995			57.4	-0.164038	57.4	1.05666
		229.8	-0.0860831	229.8	-3.44302			57.45	0.751489	57.45	0.751489
		230	-0.391259	230	-0.391259			57.5	-0.164038	57.5	1.05666
		230.2	0.524268	230.2	-0.0860831			57.55	-0.469214	57.55	1.66702
		230.4	0.829444	230.4	-1.91714			57.6	-0.469214	57.6	2.27737
		230.6	0.524268	230.6	-1.61196			57.65	-2.30027	57.65	2.27737
		230.8	3.8812	230.8	-1.61196			57.7	-3.82615	57.7	2.58254
		231	-1.91714	231	-0.0860831			57.75	-2.91062	57.75	2.27737
		231.2	-0.391259	231.2	-2.22231			57.8	-2.60544	57.8	0.141137
		231.4	-1.00161	231.4	-1.91714			57.85	-1.68992	57.85	-0.164038
		231.6	-1.00161	231.6	-2.22231			57.9	-0.77439	57.9	-0.164038
		231.8	3.27085	231.8	-0.391259			57.95	1.66702	57.95	0.141137
		232	0.524268	232	-0.0860831			58	2.58254	58	0.141137
		232.2	0.829444	232.2	-1.91714			58.05	2.58254	58.05	0.141137
		232.4	-0.391259	232.4	0.219093			58.1	2.88772	58.1	-0.469214
		232.6	0.219093	232.6	-2.52749			58.15	3.1929	58.15	0.141137
		232.8	-0.391259	232.8	-1.91714			58.2	3.49807	58.2	1.05666
		233	-0.0860831	233	-0.391259			58.25	3.80325	58.25	1.66702
		233.2	0.829444	233.2	-2.52749			58.3	2.88772	58.3	2.58254
		233.4	-0.0860831	233.4	-1.00161			58.35	-0.164038	58.35	2.58254
		233.6	3.27085	233.6	-0.0860831			58.4	-4.13132	58.4	2.27737
		233.8	-0.0860831	233.8	-3.44302			58.45	-6.26755	58.45	1.97219
		234	-0.0860831	234	-2.22231			58.5	-7.79343	58.5	1.66702
		234.2	0.829444	234.2	0.524268			58.55	-9.62449	58.55	0.141137
		234.4	0.524268	234.4	-1.91714			58.6	-10.8452	58.6	-1.07957
		234.6	0.829444	234.6	-2.22231			58.65	-10.54	58.65	-2.91062
		234.8	2.05015	234.8	-0.0860831			58.7	-8.40378	58.7	-4.13132
		235	0.219093	235	-1.91714			58.75	-6.87791	58.75	-5.04685
		235.2	0.829444	235.2	-0.0860831			58.8	-4.74167	58.8	-4.13132
		235.4	3.27085	235.4	-0.0860831			58.85	-3.2158	58.85	-1.99509
		235.6	2.35532	235.6	1.4398			58.9	-1.38474	58.9	-1.07957
		235.8	0.829444	235.8	-0.391259			58.95	0.446313	58.95	0.141137
		236	1.74497	236	1.4398			59	2.27737	59	0.141137
		236.2	2.35532	236.2	0.524268			59.05	3.1929	59.05	-0.469214
		236.4	3.8812	236.4	0.524268			59.1	3.1929	59.1	-1.68992
		236.6	0.829444	236.6	-2.22231			59.15	1.97219	59.15	-1.07957
		236.8	-1.61196	236.8	-1.30679			59.2	0.751489	59.2	-0.164038
		237	-1.30679	237	-0.0860831			59.25	1.05666	59.25	0.751489
		237.2	-0.0860831	237.2	-1.91714			59.3	-0.77439	59.3	-0.469214
		237.4	3.57603	237.4	1.4398			59.35	-2.30027	59.35	-1.99509
		237.6	1.13462	237.6	0.219093			59.4	-3.2158	59.4	-3.2158
		237.8	-0.0860831	237.8	-1.30679			59.45	-1.99509	59.45	-4.13132
		238	1.4398	238	-1.00161			59.5	-2.30027	59.5	-4.13132
		238.2	2.05015	238.2	-1.61196			59.55	-2.60544	59.55	-1.68992
		238.4	0.219093	238.4	-0.0860831			59.6	-2.30027	59.6	0.141137
		238.6	-0.0860831	238.6	-1.30679			59.65	-0.164038	59.65	0.446313
		238.8	0.219093	238.8	-0.696435			59.7	0.751489	59.7	0.751489
		239	1.13462	239	-1.91714			59.75	1.05666	59.75	2.58254
		239.2	-0.0860831	239.2	-2.83267			59.8	1.05666	59.8	1.97219
		239.4	-0.0860831	239.4	0.219093			59.85	1.66702	59.85	1.36184
		239.6	-0.0860831	239.6	-0.0860831			59.9	3.49807	59.9	1.05666
		239.8	-0.0860831	239.8	-2.22231			59.95	4.10842	59.95	1.05666
		240	-0.0860831	240	-2.22231			60	2.27737	60	-0.164038
		240.2	-0.391259	240.2	0.219093			60.05	-0.469214	60.05	-0.77439
		240.4	0.829444	240.4	-0.696435			60.1	-2.30027	60.1	-0.77439
		240.6	-0.0860831	240.6	-1.00161			60.15	-0.469214	60.15	-0.164038
		240.8	0.829444	240.8	-1.61196			60.2	0.446313	60.2	1.05666
		241	-1.00161	241	-2.52749			60.25	0.141137	60.25	1.05666
		241.2	-0.0860831	241.2	-2.22231			60.3	-1.99509	60.3	1.66702
		241.4	0.829444	241.4	-4.66372			60.35	-3.82615	60.35	1.97219
		241.6	4.79673	241.6	-1.00161			60.4	-4.13132	60.4	1.66702
		241.8	0.829444	241.8	-0.696435			60.45	-3.82615	60.45	1.97219
		242	-0.696435	242	-2.52749			60.5	-2.91062	60.5	1.36184
		242.2	-1.61196	242.2	-1.00161			60.55	-1.38474	60.55	-0.77439
		242.4	1.74497	242.4	-0.0860831			60.6	-1.68992	60.6	-1.38474
		242.6	-1.00161	242.6	-1.91714			60.65	-1.68992	60.65	-1.68992
		242.8	1.4398	242.8	-1.30679			60.7	-1.38474	60.7	-1.68992
		243	-0.0860831	243	-1.30679			60.75	-1.38474	60.75	-1.99509
		243.2	-0.391259	243.2	-0.0860831			60.8	-1.68992	60.8	-2.30027
		243.4	0.829444	243.4	1.4398			60.85	-2.30027	60.85	-2.30027
		243.6	2.96567	243.6	-1.91714			60.9	-5.04685	60.9	-1.68992
		243.8	-1.61196	243.8	-2.22231			60.95	-5.04685	60.95	-1.68992
		244	-2.22231	244	-1.91714			61	-3.82615	61	-1.38474
		244.2	1.74497	244.2	-1.91714			61.05	-4.13132	61.05	-0.164038
		244.4	1.13462	244.4	-0.696435			61.1	-4.74167	61.1	1.05666
		244.6	1.4398	244.6	0.524268			61.15	-1.68992	61.15	1.36184
		244.8	0.829444	244.8	-0.0860831			61.2	2.27737	61.2	1.36184
		245	-4.9689	245	0.524268			61.25	3.49807	61.25	1.97219
		245.2	-0.696435	245.2	-1.30679			61.3	0.751489	61.3	3.80325
		245.4	-0.696435	245.4	-1.61196			61.35	-1.99509	61.35	4.10842
		245.6	1.4398	245.6	-1.61196			61.4	-4.74167	61.4	3.49807
		245.8	0.829444	245.8	-0.0860831			61.45	-5.6572	61.45	3.1929
		246	0.829444	246	-0.696435			61.5	-5.6572	61.5	1.97219
		246.2	0.219093	246.2	-2.83267			61.55	-4.74167	61.55	0.751489
		246.4	0.524268	246.4	-0.391259			61.6	-3.82615	61.6	-1.38474
		246.6	1.4398	246.6	-1.91714			61.65	-3.82615	61.65	-3.52097
		246.8	0.524268	246.8	-1.61196			61.7	-1.07957	61.7	-5.35203
		247	-0.696435	247	-1.30679			61.75	1.97219	61.75	-5.35203
		247.2	1.4398	247.2	-2.83267			61.8	3.80325	61.8	-4.13132
		247.4	1.13462	247.4	-0.0860831			61.85	4.10842	61.85	-1.99509
		247.6	-0.0860831	247.6	-2.52749			61.9	2.58254	61.9	-0.164038
		247.8	2.6605	247.8	-2.83267			61.95	-0.469214	61.95	0.446313
		248	2.05015	248	-0.696435			62	-2.91062	62	-0.77439
		248.2	0.524268	248.2	-4.66372			62.05	-4.13132	62.05	-2.91062
		248.4	3.27085	248.4	-0.0860831			62.1	-4.4365	62.1	-5.04685
		248.6	-1.61196	248.6	0.219093			62.15	-5.04685	62.15	-5.35203
		248.8	-0.391259	248.8	-1.30679			62.2	-4.13132	62.2	-5.35203
		249	-1.30679	249	-2.22231			62.25	-1.07957	62.25	-4.4365
		249.2	2.6605	249.2	-1.00161			62.3	1.66702	62.3	-3.82615
		249.4	2.05015	249.4	-1.30679			62.35	4.4136	62.35	-4.4365
		249.6	2.6605	249.6	-0.696435			62.4	4.4136	62.4	-4.13132
		249.8	4.18638	249.8	-0.0860831			62.45	2.88772	62.45	-1.99509
		250	1.13462	250	1.13462			62.5	1.05666	62.5	-1.38474
		250.2	1.4398	250.2	-1.00161			62.55	-0.77439	62.55	-1.38474
		250.4	0.524268	250.4	-1.30679			62.6	-2.60544	62.6	-2.91062
		250.6	1.4398	250.6	-1.00161			62.65	-1.68992	62.65	-4.13132
		250.8	0.219093	250.8	0.829444			62.7	-1.68992	62.7	-3.52097
		251	0.219093	251	-1.00161			62.75	-2.30027	62.75	-4.13132
		251.2	-0.391259	251.2	-1.00161			62.8	-2.60544	62.8	-3.52097
		251.4	0.829444	251.4	-0.391259			62.85	-3.52097	62.85	-1.38474
		251.6	0.524268	251.6	-1.61196			62.9	-4.74167	62.9	-0.77439
		251.8	1.4398	251.8	-1.91714			62.95	-4.4365	62.95	-0.77439
		252	0.829444	252	-1.00161			63	-3.2158	63	0.141137
		252.2	0.524268	252.2	-2.52749			63.05	-2.30027	63.05	0.751489
		252.4	0.829444	252.4	-0.391259			63.1	-1.38474	63.1	0.751489
		252.6	0.829444	252.6	-0.391259			63.15	-0.77439	63.15	-0.469214
		252.8	-1.30679	252.8	-4.05337			63.2	-1.07957	63.2	0.141137
		253	1.74497	253	-4.05337			63.25	-2.30027	63.25	2.88772
		253.2	4.18638	253.2	-5.57925			63.3	-2.91062	63.3	4.10842
		253.4	2.6605	253.4	-3.13784			63.35	-2.91062	63.35	4.10842
		253.6	0.219093	253.6	-2.52749			63.4	-4.13132	63.4	2.88772
		253.8	-0.696435	253.8	-0.696435			63.45	-3.82615	63.45	1.36184
		254	-1.00161	254	-2.52749			63.5	-2.60544	63.5	1.05666
		254.2	0.829444	254.2	-0.0860831			63.55	-2.30027	63.55	-0.77439
		254.4	1.4398	254.4	-0.0860831			63.6	-2.91062	63.6	-1.38474
		254.6	1.13462	254.6	-0.0860831			63.65	-3.2158	63.65	-2.60544
		254.8	2.05015	254.8	-0.0860831			63.7	-1.38474	63.7	-4.13132
		255	0.524268	255	-2.83267			63.75	-0.77439	63.75	-3.82615
		255.2	1.4398	255.2	-1.91714			63.8	-1.38474	63.8	-2.91062
		255.4	-0.391259	255.4	-1.00161			63.85	-0.469214	63.85	-0.77439
		255.6	-1.00161	255.6	-3.74819			63.9	1.36184	63.9	0.751489
		255.8	-0.696435	255.8	-2.52749			63.95	1.66702	63.95	1.66702
		256	1.4398	256	-0.0860831			64	-0.164038	64	0.446313
		256.2	1.4398	256.2	-1.00161			64.05	-1.38474	64.05	-1.07957
		256.4	-0.0860831	256.4	-1.00161			64.1	-2.91062	64.1	-0.77439
		256.6	0.829444	256.6	-0.0860831			64.15	-4.74167	64.15	0.141137
		256.8	-0.696435	256.8	-0.696435			64.2	-6.26755	64.2	-0.164038
		257	1.4398	257	-0.0860831			64.25	-5.6572	64.25	-0.77439
		257.2	-1.00161	257.2	-1.00161			64.3	-5.35203	64.3	-0.77439
		257.4	1.4398	257.4	-0.696435			64.35	-5.6572	64.35	-0.469214
		257.6	0.829444	257.6	-1.30679			64.4	-4.4365	64.4	0.751489
		257.8	-0.391259	257.8	-0.696435			64.45	-3.2158	64.45	1.36184
		258	2.35532	258	-1.00161			64.5	-3.52097	64.5	1.66702
		258.2	2.96567	258.2	-2.52749			64.55	-3.2158	64.55	0.446313
		258.4	0.219093	258.4	-0.696435			64.6	-1.68992	64.6	-0.469214
		258.6	-0.0860831	258.6	-0.391259			64.65	0.446313	64.65	-1.07957
		258.8	0.524268	258.8	-2.83267			64.7	2.27737	64.7	-1.38474
		259	1.13462	259	-4.05337			64.75	3.49807	64.75	-1.07957
		259.2	-1.61196	259.2	-1.91714			64.8	3.49807	64.8	0.446313
		259.4	-0.391259	259.4	-2.83267			64.85	1.05666	64.85	1.36184
		259.6	1.13462	259.6	-3.13784			64.9	0.141137	64.9	2.27737
		259.8	-0.0860831	259.8	-0.0860831			64.95	-1.99509	64.95	2.27737
		260	1.13462	260	-2.22231			65	-4.13132	65	1.66702
		260.2	-0.0860831	260.2	-0.696435			65.05	-3.82615	65.05	2.88772
		260.4	-1.91714	260.4	-1.00161			65.1	-3.2158	65.1	3.1929
		260.6	0.219093	260.6	-3.44302			65.15	-2.91062	65.15	2.58254
		260.8	0.829444	260.8	0.524268			65.2	-3.82615	65.2	0.751489
		261	1.74497	261	0.219093			65.25	-3.52097	65.25	-0.77439
		261.2	1.13462	261.2	-0.0860831			65.3	-2.91062	65.3	-1.68992
		261.4	1.13462	261.4	0.524268			65.35	-1.99509	65.35	-1.68992
		261.6	0.829444	261.6	-0.696435			65.4	-1.38474	65.4	-0.164038
		261.8	1.74497	261.8	1.4398			65.45	-2.30027	65.45	1.05666
		262	1.13462	262	0.219093			65.5	-3.2158	65.5	0.751489
		262.2	0.219093	262.2	-0.0860831			65.55	-2.91062	65.55	-0.77439
		262.4	0.219093	262.4	-1.00161			65.6	-1.68992	65.6	-0.77439
		262.6	2.96567	262.6	2.05015			65.65	-1.07957	65.65	0.751489
		262.8	-0.391259	262.8	-2.83267			65.7	-0.164038	65.7	0.446313
		263	3.57603	263	-0.696435			65.75	0.751489	65.75	0.751489
		263.2	3.27085	263.2	2.35532			65.8	-1.38474	65.8	1.36184
		263.4	2.35532	263.4	-2.22231			65.85	-2.91062	65.85	1.36184
		263.6	-2.52749	263.6	-1.00161			65.9	-2.91062	65.9	1.36184
		263.8	-0.696435	263.8	-1.61196			65.95	-2.91062	65.95	0.751489
		264	1.13462	264	0.219093			66	-3.82615	66	-0.77439
		264.2	-0.0860831	264.2	-1.00161			66.05	-4.13132	66.05	-1.68992
		264.4	-1.30679	264.4	0.829444			66.1	-4.4365	66.1	-2.60544
		264.6	5.40708	264.6	-4.05337			66.15	-3.2158	66.15	-2.91062
		264.8	-0.391259	264.8	-2.22231			66.2	-1.07957	66.2	-3.2158
		265	0.219093	265	-3.74819			66.25	1.36184	66.25	-3.2158
		265.2	0.219093	265.2	0.524268			66.3	3.80325	66.3	-2.91062
		265.4	-1.30679	265.4	-0.0860831			66.35	4.10842	66.35	-3.52097
		265.6	0.219093	265.6	-0.696435			66.4	3.1929	66.4	-4.13132
		265.8	-1.00161	265.8	-1.91714			66.45	1.66702	66.45	-4.4365
		266	-1.00161	266	-2.52749			66.5	0.446313	66.5	-4.4365
		266.2	0.829444	266.2	-2.83267			66.55	-1.99509	66.55	-2.30027
		266.4	1.13462	266.4	-3.13784			66.6	-4.74167	66.6	0.446313
		266.6	-1.61196	266.6	-1.91714			66.65	-6.57273	66.65	2.58254
		266.8	-0.0860831	266.8	-0.391259			66.7	-6.57273	66.7	3.49807
		267	-1.30679	267	-2.22231			66.75	-5.6572	66.75	2.58254
		267.2	2.6605	267.2	0.829444			66.8	-3.2158	66.8	1.36184
		267.4	0.524268	267.4	-1.30679			66.85	0.141137	66.85	1.36184
		267.6	-1.91714	267.6	-1.61196			66.9	2.58254	66.9	1.05666
		267.8	0.524268	267.8	0.219093			66.95	3.80325	66.95	1.66702
		268	3.27085	268	-1.91714			67	4.10842	67	2.58254
		268.2	-0.391259	268.2	-2.52749			67.05	2.27737	67.05	3.1929
		268.4	-0.696435	268.4	-0.0860831			67.1	-0.164038	67.1	2.58254
		268.6	1.74497	268.6	1.74497			67.15	-1.38474	67.15	1.66702
		268.8	1.4398	268.8	-1.91714			67.2	-2.60544	67.2	0.751489
		269	0.829444	269	-3.74819			67.25	-3.82615	67.25	-1.68992
		269.2	0.829444	269.2	-1.61196			67.3	-6.57273	67.3	-3.2158
		269.4	0.219093	269.4	-1.00161			67.35	-8.70896	67.35	-2.30027
		269.6	0.829444	269.6	0.219093			67.4	-9.62449	67.4	-1.38474
		269.8	0.829444	269.8	0.219093			67.45	-8.09861	67.45	-1.38474
		270	1.4398	270	-0.696435			67.5	-5.96238	67.5	-0.77439
		270.2	-0.0860831	270.2	1.13462			67.55	-2.60544	67.55	-0.469214
		270.4	1.4398	270.4	-0.696435			67.6	1.05666	67.6	0.141137
		270.6	2.05015	270.6	-1.61196			67.65	4.10842	67.65	0.751489
		270.8	-0.0860831	270.8	0.219093			67.7	4.10842	67.7	-0.469214
		271	-0.696435	271	-1.00161			67.75	4.10842	67.75	-1.38474
		271.2	-1.61196	271.2	-0.696435			67.8	2.88772	67.8	-0.77439
		271.4	-1.61196	271.4	-2.52749			67.85	0.141137	67.85	0.446313
		271.6	1.4398	271.6	-3.13784			67.9	-1.99509	67.9	1.66702
		271.8	3.8812	271.8	-1.30679			67.95	-4.13132	67.95	2.27737
		272	1.74497	272	-0.391259			68	-7.18308	68	3.80325
		272.2	1.13462	272.2	-0.0860831			68.05	-9.62449	68.05	4.10842
		272.4	-1.30679	272.4	-1.00161			68.1	-9.31931	68.1	4.71877
		272.6	2.05015	272.6	0.219093			68.15	-8.09861	68.15	5.32913
		272.8	-1.61196	272.8	0.829444			68.2	-6.26755	68.2	5.02395
		273	-1.91714	273	-3.74819			68.25	-4.13132	68.25	3.49807
		273.2	1.4398	273.2	0.524268			68.3	-2.91062	68.3	1.36184
		273.4	-1.00161	273.4	0.829444			68.35	-1.68992	68.35	-0.164038
		273.6	-1.30679	273.6	-1.30679			68.4	-1.68992	68.4	-0.77439
		273.8	0.219093	273.8	-1.30679			68.45	-3.2158	68.45	-0.469214
		274	-0.391259	274	-2.83267			68.5	-4.4365	68.5	0.751489
		274.2	-1.30679	274.2	-0.696435			68.55	-5.35203	68.55	0.751489
		274.4	4.18638	274.4	-2.22231			68.6	-6.57273	68.6	0.751489
		274.6	-0.0860831	274.6	-0.0860831			68.65	-6.57273	68.65	1.05666
		274.8	-1.00161	274.8	-0.0860831			68.7	-4.4365	68.7	1.05666
		275	-1.30679	275	-0.696435			68.75	-3.2158	68.75	1.97219
		275.2	-0.391259	275.2	-3.74819			68.8	-1.68992	68.8	1.36184
		275.4	-1.91714	275.4	-4.05337			68.85	-2.60544	68.85	-0.469214
		275.6	-0.0860831	275.6	0.219093			68.9	-4.4365	68.9	-1.68992
		275.8	-0.0860831	275.8	-0.0860831			68.95	-3.2158	68.95	-0.77439
		276	0.219093	276	-0.391259			69	-1.99509	69	-0.469214
		276.2	-0.391259	276.2	-0.0860831			69.05	-1.68992	69.05	-1.07957
		276.4	1.13462	276.4	-2.52749			69.1	0.141137	69.1	-2.91062
		276.6	2.96567	276.6	-3.13784			69.15	0.446313	69.15	-2.60544
		276.8	3.27085	276.8	-0.391259			69.2	-1.68992	69.2	-1.99509
		277	-1.30679	277	-0.0860831			69.25	-3.2158	69.25	-1.38474
		277.2	0.219093	277.2	-1.30679			69.3	-4.74167	69.3	0.141137
		277.4	1.13462	277.4	-2.22231			69.35	-5.96238	69.35	1.05666
		277.6	-0.0860831	277.6	-0.0860831			69.4	-6.57273	69.4	2.58254
		277.8	1.4398	277.8	-0.696435			69.45	-6.57273	69.45	3.1929
		278	-2.22231	278	-3.74819			69.5	-5.96238	69.5	1.36184
		278.2	-1.00161	278.2	0.829444			69.55	-5.04685	69.55	-0.164038
		278.4	3.27085	278.4	-1.00161			69.6	-4.13132	69.6	0.446313
		278.6	1.13462	278.6	-3.13784			69.65	-3.52097	69.65	1.05666
		278.8	-0.0860831	278.8	-1.61196			69.7	-2.60544	69.7	2.58254
		279	0.524268	279	-1.61196			69.75	-1.38474	69.75	3.49807
		279.2	3.57603	279.2	-3.44302			69.8	-0.469214	69.8	1.97219
		279.4	1.74497	279.4	-6.49477			69.85	-0.469214	69.85	1.05666
		279.6	-0.391259	279.6	-3.74819			69.9	-1.38474	69.9	1.97219
		279.8	1.4398	279.8	-2.52749			69.95	-1.99509	69.95	1.36184
		280	1.74497	280	1.13462			70	-2.30027	70	0.446313
		280.2	1.4398	280.2	-2.52749			70.05	-1.99509	70.05	1.05666
		280.4	0.829444	280.4	-2.52749			70.1	-1.07957	70.1	-0.164038
		280.6	1.74497	280.6	-3.44302			70.15	-0.164038	70.15	-1.38474
		280.8	-1.61196	280.8	-2.83267			70.2	0.141137	70.2	-4.13132
		281	-0.0860831	281	-1.30679			70.25	0.141137	70.25	-5.96238
		281.2	2.35532	281.2	-0.696435			70.3	1.36184	70.3	-5.96238
		281.4	0.524268	281.4	-2.52749			70.35	1.97219	70.35	-5.35203
		281.6	1.4398	281.6	-3.44302			70.4	1.66702	70.4	-4.4365
		281.8	3.27085	281.8	-2.22231			70.45	0.751489	70.45	-3.52097
		282	-0.391259	282	-0.391259			70.5	-1.38474	70.5	-1.99509
		282.2	1.4398	282.2	-0.0860831			70.55	-2.91062	70.55	0.446313
		282.4	2.6605	282.4	-3.13784			70.6	-2.60544	70.6	0.446313
		282.6	2.96567	282.6	-1.30679			70.65	-1.99509	70.65	-0.164038
		282.8	-0.0860831	282.8	0.524268			70.7	-1.99509	70.7	0.751489
		283	0.219093	283	-3.13784			70.75	-1.68992	70.75	1.97219
		283.2	1.74497	283.2	-2.22231			70.8	-1.99509	70.8	3.1929
		283.4	2.35532	283.4	-0.696435			70.85	-2.91062	70.85	3.1929
		283.6	1.74497	283.6	-2.52749			70.9	-3.52097	70.9	2.27737
		283.8	0.524268	283.8	-1.61196			70.95	-2.60544	70.95	1.66702
		284	-0.0860831	284	-2.83267			71	-3.2158	71	1.05666
		284.2	2.05015	284.2	-1.91714			71.05	-3.82615	71.05	-1.07957
		284.4	1.74497	284.4	-0.0860831			71.1	-2.91062	71.1	-2.60544
		284.6	2.6605	284.6	-1.30679			71.15	-3.2158	71.15	-1.38474
		284.8	2.05015	284.8	-3.44302			71.2	-2.60544	71.2	-0.469214
		285	2.05015	285	-1.91714			71.25	-1.99509	71.25	0.446313
		285.2	1.4398	285.2	0.219093			71.3	-1.38474	71.3	0.141137
		285.4	-0.0860831	285.4	2.6605			71.35	-1.07957	71.35	-0.164038
		285.6	4.49155	285.6	-1.30679			71.4	-0.77439	71.4	1.05666
		285.8	2.35532	285.8	-2.52749			71.45	-0.77439	71.45	1.36184
		286	1.13462	286	-4.05337			71.5	0.141137	71.5	1.36184
		286.2	3.57603	286.2	-0.696435			71.55	0.446313	71.55	1.36184
		286.4	0.524268	286.4	-0.0860831			71.6	0.141137	71.6	1.36184
		286.6	0.219093	286.6	0.524268			71.65	0.446313	71.65	0.751489
		286.8	4.18638	286.8	-2.22231			71.7	-0.469214	71.7	-0.164038
		287	4.49155	287	-1.91714			71.75	-0.469214	71.75	0.751489
		287.2	4.49155	287.2	-1.61196			71.8	-0.469214	71.8	2.27737
		287.4	1.74497	287.4	-0.0860831			71.85	-0.77439	71.85	4.10842
		287.6	-0.0860831	287.6	-3.74819			71.9	-1.38474	71.9	4.10842
		287.8	2.05015	287.8	-1.00161			71.95	-2.30027	71.95	3.49807
		288	1.4398	288	1.13462			72	-0.77439	72	3.80325
		288.2	-0.0860831	288.2	-4.05337			72.05	0.141137	72.05	4.10842
		288.4	0.524268	288.4	-1.30679			72.1	0.751489	72.1	2.88772
		288.6	1.74497	288.6	0.524268			72.15	2.58254	72.15	3.1929
		288.8	0.524268	288.8	0.524268			72.2	3.80325	72.2	4.71877
		289	4.18638	289	-2.52749			72.25	3.49807	72.25	4.10842
		289.2	3.8812	289.2	-1.00161			72.3	1.36184	72.3	3.1929
		289.4	-1.00161	289.4	-0.0860831			72.35	-1.38474	72.35	3.1929
		289.6	-0.391259	289.6	-1.30679			72.4	-2.91062	72.4	1.66702
		289.8	-0.0860831	289.8	-0.0860831			72.45	-2.91062	72.45	0.446313
		290	1.4398	290	-1.00161			72.5	-2.60544	72.5	0.141137
		290.2	3.57603	290.2	-3.13784			72.55	-2.30027	72.55	1.05666
		290.4	-0.0860831	290.4	-3.44302			72.6	-2.30027	72.6	1.36184
		290.6	-0.0860831	290.6	-2.22231			72.65	-1.68992	72.65	1.05666
		290.8	1.13462	290.8	-1.00161			72.7	-0.469214	72.7	1.97219
		291	1.74497	291	-0.0860831			72.75	-0.469214	72.75	1.97219
		291.2	0.829444	291.2	-2.22231			72.8	-1.68992	72.8	-0.164038
		291.4	1.4398	291.4	-2.83267			72.85	-1.38474	72.85	-0.77439
		291.6	1.4398	291.6	-2.22231			72.9	0.751489	72.9	-2.91062
		291.8	-0.0860831	291.8	1.4398			72.95	2.88772	72.95	-5.04685
		292	1.74497	292	-1.30679			73	4.4136	73	-5.04685
		292.2	3.27085	292.2	-3.13784			73.05	4.71877	73.05	-3.82615
		292.4	1.13462	292.4	-3.74819			73.1	4.10842	73.1	-3.82615
		292.6	0.219093	292.6	-2.22231			73.15	3.80325	73.15	-2.91062
		292.8	0.524268	292.8	0.219093			73.2	2.88772	73.2	-2.91062
		293	1.74497	293	-0.0860831			73.25	0.141137	73.25	-3.52097
		293.2	-0.0860831	293.2	-0.0860831			73.3	0.141137	73.3	-3.2158
		293.4	3.27085	293.4	-2.52749			73.35	-0.469214	73.35	-1.38474
		293.6	1.13462	293.6	-2.22231			73.4	-1.38474	73.4	-1.07957
		293.8	-1.00161	293.8	-1.61196			73.45	-1.99509	73.45	-1.99509
		294	-0.391259	294	-0.391259			73.5	-1.99509	73.5	-2.30027
		294.2	5.1019	294.2	-1.00161			73.55	-1.68992	73.55	-1.38474
		294.4	5.1019	294.4	-1.00161			73.6	-0.469214	73.6	-0.77439
		294.6	-0.0860831	294.6	-2.52749			73.65	-1.38474	73.65	0.446313
		294.8	-0.391259	294.8	-2.22231			73.7	-4.4365	73.7	0.141137
		295	1.74497	295	-0.696435			73.75	-5.04685	73.75	1.36184
		295.2	2.05015	295.2	-2.83267			73.8	-4.74167	73.8	1.97219
		295.4	3.57603	295.4	-2.22231			73.85	-5.04685	73.85	2.58254
		295.6	-0.0860831	295.6	-0.696435			73.9	-4.74167	73.9	2.58254
		295.8	-0.0860831	295.8	-3.44302			73.95	-4.13132	73.95	2.58254
		296	3.8812	296	0.219093			74	-3.82615	74	4.10842
		296.2	-0.0860831	296.2	-2.83267			74.05	-3.82615	74.05	3.1929
		296.4	-0.696435	296.4	-3.44302			74.1	-3.2158	74.1	1.05666
		296.6	-0.0860831	296.6	-3.44302			74.15	-1.99509	74.15	1.66702
		296.8	2.6605	296.8	0.219093			74.2	-2.30027	74.2	1.66702
		297	0.524268	297	-1.91714			74.25	-1.99509	74.25	0.751489
		297.2	0.829444	297.2	-3.44302			74.3	-1.68992	74.3	1.36184
		297.4	0.829444	297.4	-1.61196			74.35	-1.99509	74.35	1.66702
		297.6	-0.0860831	297.6	-0.0860831			74.4	-1.68992	74.4	0.446313
		297.8	0.219093	297.8	-2.22231			74.45	-0.77439	74.45	-0.469214
		298	0.219093	298	-3.13784			74.5	1.66702	74.5	-1.07957
		298.2	1.4398	298.2	-2.22231			74.55	3.80325	74.55	-1.07957
		298.4	-1.00161	298.4	-1.91714			74.6	4.10842	74.6	-1.99509
		298.6	0.829444	298.6	-0.391259			74.65	4.10842	74.65	-3.2158
		298.8	2.05015	298.8	0.219093			74.7	4.71877	74.7	-3.52097
		299	-0.0860831	299	-2.52749			74.75	4.71877	74.75	-2.30027
		299.2	1.13462	299.2	-2.83267			74.8	2.58254	74.8	-0.77439
		299.4	0.524268	299.4	0.829444			74.85	-0.77439	74.85	0.446313
		299.6	0.219093	299.6	-0.391259			74.9	-2.60544	74.9	1.36184
		299.8	1.13462	299.8	-0.0860831			74.95	-3.82615	74.95	0.446313
		300	2.96567	300	-3.74819			75	-4.13132	75	0.141137
		300.2	1.74497	300.2	-1.30679			75.05	-4.4365	75.05	-0.469214
		300.4	3.57603	300.4	-2.83267			75.1	-5.35203	75.1	-0.77439
		300.6	1.74497	300.6	-2.22231			75.15	-5.04685	75.15	-0.77439
		300.8	-1.61196	300.8	-4.05337			75.2	-3.52097	75.2	-1.99509
		301	1.74497	301	-3.13784			75.25	-1.68992	75.25	-2.91062
		301.2	3.57603	301.2	-1.61196			75.3	-0.469214	75.3	-2.60544
		301.4	2.35532	301.4	-1.91714			75.35	2.88772	75.35	-1.38474
		301.6	2.35532	301.6	1.4398			75.4	4.4136	75.4	-1.38474
		301.8	-1.61196	301.8	-2.22231			75.45	3.80325	75.45	-2.91062
		302	1.74497	302	-1.00161			75.5	1.97219	75.5	-2.60544
		302.2	3.8812	302.2	-1.00161			75.55	1.36184	75.55	-0.164038
		302.4	2.96567	302.4	0.829444			75.6	1.05666	75.6	2.88772
		302.6	1.13462	302.6	-2.22231			75.65	0.446313	75.65	5.32913
		302.8	2.6605	302.8	-0.696435			75.7	-1.38474	75.7	6.54983
		303	1.4398	303	-0.391259			75.75	-3.52097	75.75	6.54983
		303.2	2.35532	303.2	-0.696435			75.8	-5.04685	75.8	6.24465
		303.4	2.35532	303.4	-0.391259			75.85	-5.35203	75.85	4.71877
		303.6	2.05015	303.6	-0.696435			75.9	-5.04685	75.9	3.80325
		303.8	0.524268	303.8	-1.00161			75.95	-4.13132	75.95	3.49807
		304	1.4398	304	-0.696435			76	-3.2158	76	3.1929
		304.2	1.4398	304.2	-1.00161			76.05	-1.38474	76.05	1.36184
		304.4	1.13462	304.4	-1.61196			76.1	0.446313	76.1	-1.07957
		304.6	1.13462	304.6	1.13462			76.15	1.36184	76.15	-1.38474
		304.8	2.05015	304.8	-0.696435			76.2	0.751489	76.2	-0.469214
		305	1.74497	305	1.13462			76.25	0.751489	76.25	0.446313
		305.2	0.829444	305.2	-0.391259			76.3	1.05666	76.3	1.97219
		305.4	3.27085	305.4	-2.22231			76.35	1.05666	76.35	1.66702
		305.6	0.524268	305.6	-0.0860831			76.4	-0.164038	76.4	1.05666
		305.8	2.05015	305.8	-0.391259			76.45	-1.38474	76.45	1.66702
		306	1.4398	306	-1.61196			76.5	-1.99509	76.5	1.36184
		306.2	3.27085	306.2	-3.74819			76.55	-2.30027	76.55	0.751489
		306.4	2.96567	306.4	-1.00161			76.6	-1.68992	76.6	1.36184
		306.6	1.74497	306.6	-0.696435			76.65	-1.07957	76.65	2.58254
		306.8	-0.0860831	306.8	-0.696435			76.7	-2.60544	76.7	1.66702
		307	1.4398	307	-2.22231			76.75	-4.4365	76.75	1.05666
		307.2	-0.696435	307.2	-2.22231			76.8	-6.26755	76.8	0.751489
		307.4	0.219093	307.4	-1.00161			76.85	-6.26755	76.85	1.05666
		307.6	1.74497	307.6	-1.61196			76.9	-6.57273	76.9	1.66702
		307.8	1.74497	307.8	-1.91714			76.95	-5.96238	76.95	2.27737
		308	-0.0860831	308	-2.22231			77	-4.4365	77	2.27737
		308.2	-1.91714	308.2	-0.696435			77.05	-4.74167	77.05	2.27737
		308.4	3.57603	308.4	-1.30679			77.1	-3.82615	77.1	0.141137
		308.6	0.524268	308.6	-1.30679			77.15	-1.68992	77.15	-1.38474
		308.8	-0.391259	308.8	-2.22231			77.2	-0.469214	77.2	-0.77439
		309	-0.0860831	309	-2.22231			77.25	0.141137	77.25	-1.38474
		309.2	0.524268	309.2	-1.61196			77.3	1.36184	77.3	0.141137
		309.4	0.219093	309.4	-2.83267			77.35	2.27737	77.35	1.97219
		309.6	2.6605	309.6	-1.61196			77.4	3.80325	77.4	3.80325
		309.8	-0.0860831	309.8	0.829444			77.45	4.10842	77.45	5.93948
		310	-0.0860831	310	-2.52749			77.5	1.97219	77.5	7.16018
		310.2	-0.0860831	310.2	-4.66372			77.55	0.446313	77.55	7.77053
		310.4	2.35532	310.4	-2.52749			77.6	1.05666	77.6	8.68606
		310.6	0.829444	310.6	-2.52749			77.65	1.05666	77.65	8.38088
		310.8	-0.0860831	310.8	-1.30679			77.7	0.751489	77.7	7.77053
		311	-0.391259	311	-4.66372			77.75	-0.469214	77.75	6.24465
		311.2	0.219093	311.2	-1.00161			77.8	-1.07957	77.8	4.10842
		311.4	-1.30679	311.4	-0.0860831			77.85	-0.164038	77.85	2.88772
		311.6	2.96567	311.6	-0.0860831			77.9	1.36184	77.9	1.05666
		311.8	0.829444	311.8	-2.52749			77.95	1.36184	77.95	0.751489
		312	1.74497	312	-3.44302			78	0.141137	78	0.751489
		312.2	3.27085	312.2	-4.05337			78.05	-0.469214	78.05	0.446313
		312.4	-0.0860831	312.4	-1.91714			78.1	-2.30027	78.1	-0.469214
		312.6	-1.00161	312.6	-2.52749			78.15	-3.52097	78.15	-2.60544
		312.8	1.4398	312.8	-2.52749			78.2	-3.52097	78.2	-3.2158
		313	-0.0860831	313	0.219093			78.25	-4.4365	78.25	-3.52097
		313.2	-0.0860831	313.2	-2.52749			78.3	-4.74167	78.3	-3.2158
		313.4	1.74497	313.4	-3.44302			78.35	-3.52097	78.35	-2.30027
		313.6	0.524268	313.6	-1.30679			78.4	-2.60544	78.4	-1.07957
		313.8	1.13462	313.8	0.219093			78.45	-2.91062	78.45	0.751489
		314	0.829444	314	-0.391259			78.5	-2.60544	78.5	1.05666
		314.2	-2.22231	314.2	-2.83267			78.55	-1.68992	78.55	-0.164038
		314.4	2.35532	314.4	-1.91714			78.6	-1.38474	78.6	-0.77439
		314.6	1.13462	314.6	-0.391259			78.65	-1.68992	78.65	-0.469214
		314.8	2.35532	314.8	-0.696435			78.7	-0.469214	78.7	0.141137
		315	0.829444	315	-0.0860831			78.75	0.141137	78.75	1.66702
		315.2	0.524268	315.2	-1.91714			78.8	0.446313	78.8	2.27737
		315.4	-0.0860831	315.4	-3.13784			78.85	1.66702	78.85	2.88772
		315.6	-1.61196	315.6	-1.61196			78.9	4.10842	78.9	3.80325
		315.8	2.35532	315.8	-1.00161			78.95	3.80325	78.95	4.71877
		316	2.6605	316	-2.83267			79	2.88772	79	5.93948
		316.2	2.6605	316.2	-1.00161			79.05	3.1929	79.05	6.24465
		316.4	1.74497	316.4	-1.91714			79.1	1.97219	79.1	4.4136
		316.6	0.524268	316.6	-1.91714			79.15	-1.38474	79.15	3.49807
		316.8	-0.0860831	316.8	-0.391259			79.2	-2.60544	79.2	2.27737
		317	1.74497	317	-2.52749			79.25	-2.91062	79.25	1.36184
		317.2	3.57603	317.2	-0.391259			79.3	-3.52097	79.3	-0.469214
		317.4	-0.0860831	317.4	0.524268			79.35	-3.52097	79.35	-2.60544
		317.6	0.829444	317.6	-0.0860831			79.4	-4.4365	79.4	-3.52097
		317.8	-0.0860831	317.8	1.13462			79.45	-5.96238	79.45	-3.82615
		318	1.74497	318	-2.22231			79.5	-8.09861	79.5	-3.52097
		318.2	2.6605	318.2	-0.696435			79.55	-8.70896	79.55	-1.07957
		318.4	3.57603	318.4	0.524268			79.6	-8.09861	79.6	0.446313
		318.6	-1.91714	318.6	-0.0860831			79.65	-8.09861	79.65	3.1929
		318.8	-0.391259	318.8	-0.0860831			79.7	-7.79343	79.7	5.02395
		319	1.13462	319	-0.0860831			79.75	-5.04685	79.75	4.71877
		319.2	-2.83267	319.2	-1.00161			79.8	-2.91062	79.8	4.4136
		319.4	0.219093	319.4	-1.00161			79.85	-1.07957	79.85	4.4136
		319.6	3.27085	319.6	0.524268			79.9	-0.469214	79.9	4.10842
		319.8	1.4398	319.8	-2.83267			79.95	-0.164038	79.95	4.10842
		320	0.524268	320	-0.0860831			80	-1.07957	80	3.80325
		320.2	0.524268	320.2	-2.52749			80.05	-0.77439	80.05	2.88772
		320.4	0.524268	320.4	-0.696435			80.1	-1.38474	80.1	3.49807
		320.6	-2.22231	320.6	1.4398			80.15	-1.38474	80.15	4.71877
		320.8	4.18638	320.8	1.74497			80.2	-1.68992	80.2	5.02395
		321	2.6605	321	-1.91714			80.25	-2.60544	80.25	4.10842
		321.2	1.4398	321.2	-2.83267			80.3	-3.52097	80.3	4.4136
		321.4	2.35532	321.4	-0.391259			80.35	-3.82615	80.35	4.71877
		321.6	-1.61196	321.6	0.219093			80.4	-4.4365	80.4	4.10842
		321.8	-1.00161	321.8	-2.22231			80.45	-4.74167	80.45	3.1929
		322	-0.0860831	322	-1.30679			80.5	-4.4365	80.5	2.88772
		322.2	0.524268	322.2	-0.391259			80.55	-2.91062	80.55	2.58254
		322.4	-1.61196	322.4	0.219093			80.6	-3.82615	80.6	2.27737
		322.6	2.05015	322.6	-1.61196			80.65	-4.74167	80.65	1.97219
		322.8	0.524268	322.8	-4.05337			80.7	-6.26755	80.7	1.66702
		323	1.4398	323	-1.91714			80.75	-5.35203	80.75	1.05666
		323.2	1.13462	323.2	-2.52749			80.8	-4.4365	80.8	0.751489
		323.4	-0.0860831	323.4	-1.00161			80.85	-3.2158	80.85	1.05666
		323.6	-1.61196	323.6	-1.61196			80.9	-1.68992	80.9	1.05666
		323.8	-1.30679	323.8	-1.30679			80.95	2.27737	80.95	0.141137
		324	-0.391259	324	-2.22231			81	5.32913	81	0.141137
		324.2	0.219093	324.2	-1.30679			81.05	6.24465	81.05	-0.77439
		324.4	1.4398	324.4	-1.91714			81.1	4.71877	81.1	-2.30027
		324.6	2.05015	324.6	-3.74819			81.15	3.1929	81.15	-0.77439
		324.8	-0.0860831	324.8	-1.00161			81.2	2.58254	81.2	1.36184
		325	-0.0860831	325	-4.05337			81.25	1.66702	81.25	2.88772
		325.2	1.4398	325.2	-2.22231			81.3	0.751489	81.3	3.1929
		325.4	1.4398	325.4	-1.30679			81.35	1.05666	81.35	2.27737
		325.6	1.4398	325.6	-1.30679			81.4	0.751489	81.4	2.27737
		325.8	0.219093	325.8	0.219093			81.45	-0.164038	81.45	1.05666
		326	1.13462	326	-1.91714			81.5	-0.469214	81.5	0.751489
		326.2	-0.0860831	326.2	-0.0860831			81.55	0.141137	81.55	0.751489
		326.4	-1.61196	326.4	-2.52749			81.6	-1.38474	81.6	1.36184
		326.6	-0.696435	326.6	-1.91714			81.65	-3.2158	81.65	2.58254
		326.8	-0.391259	326.8	0.219093			81.7	-2.30027	81.7	1.66702
		327	1.13462	327	-1.30679			81.75	-1.07957	81.75	0.446313
		327.2	-1.61196	327.2	-3.13784			81.8	-0.164038	81.8	-0.164038
		327.4	0.524268	327.4	-1.61196			81.85	-0.164038	81.85	-1.99509
		327.6	0.524268	327.6	0.524268			81.9	-0.469214	81.9	-3.2158
		327.8	-0.0860831	327.8	1.13462			81.95	-0.469214	81.95	-2.60544
		328	-0.696435	328	-1.00161			82	-0.77439	82	-1.68992
		328.2	0.524268	328.2	-1.61196			82.05	-0.164038	82.05	-0.469214
		328.4	-1.30679	328.4	-2.22231			82.1	-0.77439	82.1	1.05666
		328.6	-0.696435	328.6	-1.00161			82.15	-1.99509	82.15	1.36184
		328.8	-1.61196	328.8	0.219093			82.2	-1.68992	82.2	0.751489
		329	-2.52749	329	-0.391259			82.25	-0.77439	82.25	-0.164038
		329.2	2.96567	329.2	-2.52749			82.3	-0.469214	82.3	0.141137
		329.4	-0.0860831	329.4	-3.74819			82.35	-1.99509	82.35	1.05666
		329.6	-2.52749	329.6	-2.22231			82.4	-3.2158	82.4	2.58254
		329.8	2.6605	329.8	-2.83267			82.45	-2.91062	82.45	3.1929
		330	0.829444	330	-0.391259			82.5	-2.91062	82.5	2.88772
		330.2	-0.0860831	330.2	-1.61196			82.55	-3.2158	82.55	2.88772
		330.4	1.13462	330.4	-1.61196			82.6	-4.4365	82.6	2.27737
		330.6	2.05015	330.6	0.829444			82.65	-4.74167	82.65	1.36184
		330.8	2.6605	330.8	-0.391259			82.7	-2.91062	82.7	0.141137
		331	1.4398	331	-2.52749			82.75	-1.99509	82.75	-0.164038
		331.2	-1.00161	331.2	-2.52749			82.8	-0.164038	82.8	0.141137
		331.4	-0.696435	331.4	-0.0860831			82.85	1.97219	82.85	0.446313
		331.6	2.35532	331.6	-0.696435			82.9	3.80325	82.9	-0.164038
		331.8	-0.391259	331.8	0.524268			82.95	4.4136	82.95	-1.38474
		332	0.219093	332	-1.91714			83	1.97219	83	-2.30027
		332.2	-0.696435	332.2	-1.91714			83.05	-0.469214	83.05	-2.30027
		332.4	-0.0860831	332.4	-2.52749			83.1	-1.68992	83.1	-1.99509
		332.6	0.829444	332.6	-3.13784			83.15	-1.38474	83.15	-1.07957
		332.8	5.1019	332.8	-1.00161			83.2	-2.30027	83.2	-0.164038
		333	1.4398	333	-4.05337			83.25	-2.60544	83.25	-0.164038
		333.2	-3.13784	333.2	-4.05337			83.3	-2.30027	83.3	0.141137
		333.4	-0.0860831	333.4	-0.0860831			83.35	-1.99509	83.35	0.751489
		333.6	-2.22231	333.6	-0.696435			83.4	-1.68992	83.4	0.751489
		333.8	0.219093	333.8	-1.30679			83.45	-0.77439	83.45	1.05666
		334	2.35532	334	-3.74819			83.5	-0.469214	83.5	1.66702
		334.2	1.13462	334.2	-2.83267			83.55	-0.469214	83.55	1.05666
		334.4	-1.91714	334.4	-1.91714			83.6	-1.38474	83.6	0.446313
		334.6	1.4398	334.6	-0.696435			83.65	-0.164038	83.65	-0.164038
		334.8	0.829444	334.8	-2.83267			83.7	1.36184	83.7	-1.68992
		335	2.96567	335	-1.30679			83.75	2.27737	83.75	-1.99509
		335.2	1.13462	335.2	-1.91714			83.8	1.97219	83.8	-1.68992
		335.4	1.4398	335.4	-0.0860831			83.85	1.36184	83.85	-0.77439
		335.6	-2.22231	335.6	-2.52749			83.9	-0.77439	83.9	0.751489
		335.8	0.524268	335.8	-4.35854			83.95	-2.30027	83.95	2.88772
		336	0.829444	336	-1.00161			84	-3.82615	84	2.88772
		336.2	0.524268	336.2	-0.391259			84.05	-4.4365	84.05	1.97219
		336.4	-0.391259	336.4	2.35532			84.1	-5.35203	84.1	0.446313
		336.6	0.219093	336.6	-1.00161			84.15	-6.57273	84.15	0.446313
		336.8	1.74497	336.8	-2.22231			84.2	-7.18308	84.2	0.446313
		337	1.13462	337	-1.00161			84.25	-6.57273	84.25	1.36184
		337.2	-1.00161	337.2	1.13462			84.3	-4.13132	84.3	-0.164038
		337.4	2.05015	337.4	1.13462			84.35	-1.38474	84.35	-2.91062
		337.6	0.524268	337.6	-2.22231			84.4	1.05666	84.4	-3.52097
		337.8	3.8812	337.8	-0.391259			84.45	2.88772	84.45	-1.99509
		338	2.35532	338	-1.61196			84.5	3.1929	84.5	-0.164038
		338.2	2.96567	338.2	-3.44302			84.55	1.66702	84.55	0.141137
		338.4	-1.30679	338.4	-0.391259			84.6	0.751489	84.6	1.05666
		338.6	-0.0860831	338.6	-0.0860831			84.65	0.751489	84.65	2.27737
		338.8	1.74497	338.8	0.829444			84.7	1.05666	84.7	3.1929
		339	0.524268	339	-1.30679			84.75	1.97219	84.75	3.1929
		339.2	0.524268	339.2	-0.0860831			84.8	1.66702	84.8	1.05666
		339.4	-1.00161	339.4	-1.61196			84.85	-0.164038	84.85	0.446313
		339.6	2.6605	339.6	-0.0860831			84.9	-1.07957	84.9	-0.469214
		339.8	-0.0860831	339.8	-2.83267			84.95	-0.77439	84.95	-0.164038
		340	0.524268	340	-0.696435			85	-0.469214	85	0.141137
		340.2	1.74497	340.2	-2.22231			85.05	-1.07957	85.05	1.66702
		340.4	0.829444	340.4	-1.91714			85.1	-4.13132	85.1	2.88772
		340.6	0.524268	340.6	-0.696435			85.15	-7.48826	85.15	3.80325
		340.8	-0.0860831	340.8	-4.66372			85.2	-8.70896	85.2	4.10842
		341	-0.696435	341	-0.696435			85.25	-8.09861	85.25	2.58254
		341.2	-1.91714	341.2	-1.91714			85.3	-8.40378	85.3	1.05666
		341.4	-2.52749	341.4	-2.83267			85.35	-8.09861	85.35	0.446313
		341.6	1.74497	341.6	-0.0860831			85.4	-5.04685	85.4	-0.77439
		341.8	1.4398	341.8	0.219093			85.45	-0.469214	85.45	-1.68992
		342	-0.0860831	342	-1.61196			85.5	1.66702	85.5	-1.99509
		342.2	-0.0860831	342.2	-1.91714			85.55	1.97219	85.55	-1.68992
		342.4	0.219093	342.4	-0.391259			85.6	1.66702	85.6	-1.68992
		342.6	0.829444	342.6	-2.22231			85.65	-0.469214	85.65	-1.99509
		342.8	0.829444	342.8	-2.22231			85.7	-0.164038	85.7	-2.60544
		343	-1.61196	343	-1.61196			85.75	1.66702	85.75	-2.91062
		343.2	-1.00161	343.2	-0.0860831			85.8	1.97219	85.8	-2.60544
		343.4	0.829444	343.4	-1.00161			85.85	0.141137	85.85	-1.07957
		343.6	1.74497	343.6	-1.91714			85.9	-1.99509	85.9	-0.469214
		343.8	2.05015	343.8	-2.22231			85.95	-3.52097	85.95	0.446313
		344	2.96567	344	-4.35854			86	-4.13132	86	-0.164038
		344.2	2.05015	344.2	-1.30679			86.05	-3.2158	86.05	-1.07957
		344.4	0.219093	344.4	-1.61196			86.1	-4.4365	86.1	-1.07957
		344.6	-0.0860831	344.6	-1.30679			86.15	-4.74167	86.15	-0.164038
		344.8	1.13462	344.8	-1.91714			86.2	-4.13132	86.2	0.141137
		345	2.6605	345	-1.91714			86.25	-3.2158	86.25	0.751489
		345.2	0.524268	345.2	-0.391259			86.3	-2.60544	86.3	1.05666
		345.4	0.219093	345.4	-2.22231			86.35	-1.99509	86.35	1.36184
		345.6	3.8812	345.6	-1.91714			86.4	-1.68992	86.4	1.36184
		345.8	2.05015	345.8	-0.391259			86.45	-0.469214	86.45	1.36184
		346	1.4398	346	-0.0860831			86.5	-1.07957	86.5	1.66702
		346.2	-0.0860831	346.2	0.829444			86.55	-0.77439	86.55	2.27737
		346.4	-0.0860831	346.4	-0.696435			86.6	0.446313	86.6	2.27737
		346.6	1.74497	346.6	-2.83267			86.65	0.446313	86.65	3.1929
		346.8	3.57603	346.8	-1.30679			86.7	1.05666	86.7	4.10842
		347	1.74497	347	-1.00161			86.75	1.66702	86.75	4.10842
		347.2	2.35532	347.2	-4.05337			86.8	1.66702	86.8	3.49807
		347.4	0.219093	347.4	-1.00161			86.85	3.1929	86.85	3.1929
		347.6	-0.0860831	347.6	0.219093			86.9	2.88772	86.9	2.27737
		347.8	3.27085	347.8	-0.0860831			86.95	0.141137	86.95	1.66702
		348	0.219093	348	-0.391259			87	-0.77439	87	1.05666
		348.2	-0.0860831	348.2	-1.61196			87.05	0.141137	87.05	1.05666
		348.4	-0.696435	348.4	-3.13784			87.1	1.05666	87.1	0.446313
		348.6	3.27085	348.6	0.829444			87.15	1.05666	87.15	0.446313
		348.8	-0.0860831	348.8	-1.91714			87.2	1.36184	87.2	1.97219
		349	-0.0860831	349	-2.22231			87.25	1.66702	87.25	2.27737
		349.2	-0.0860831	349.2	-3.13784			87.3	0.751489	87.3	1.97219
		349.4	-2.83267	349.4	0.219093			87.35	0.751489	87.35	1.36184
		349.6	-0.391259	349.6	-0.696435			87.4	1.66702	87.4	-0.77439
		349.8	2.35532	349.8	-3.13784			87.45	2.27737	87.45	-1.68992
		350	2.05015	350	-1.91714			87.5	0.751489	87.5	-1.68992
		350.2	3.27085	350.2	0.829444			87.55	-0.77439	87.55	-2.30027
		350.4	0.524268	350.4	-0.0860831			87.6	-2.30027	87.6	-1.99509
		350.6	1.4398	350.6	-1.61196			87.65	-3.2158	87.65	-2.91062
		350.8	0.524268	350.8	-1.30679			87.7	-2.60544	87.7	-4.13132
		351	3.8812	351	0.829444			87.75	-1.07957	87.75	-2.91062
		351.2	1.74497	351.2	-1.91714			87.8	-0.469214	87.8	-1.07957
		351.4	-1.00161	351.4	0.829444			87.85	0.446313	87.85	-0.469214
		351.6	2.05015	351.6	-1.00161			87.9	3.49807	87.9	-0.469214
		351.8	-0.0860831	351.8	-3.44302			87.95	4.4136	87.95	-1.68992
		352	0.219093	352	1.13462			88	5.02395	88	-1.68992
		352.2	0.219093	352.2	-0.696435			88.05	4.4136	88.05	-1.07957
		352.4	-0.0860831	352.4	-2.22231			88.1	3.1929	88.1	-2.60544
		352.6	1.74497	352.6	-0.696435			88.15	2.58254	88.15	-3.2158
		352.8	2.35532	352.8	-1.00161			88.2	1.97219	88.2	-2.91062
		353	1.13462	353	-0.0860831			88.25	0.141137	88.25	-2.30027
		353.2	0.524268	353.2	1.13462			88.3	-1.68992	88.3	-0.77439
		353.4	-0.696435	353.4	-1.91714			88.35	-2.91062	88.35	0.751489
		353.6	2.6605	353.6	-3.74819			88.4	-4.4365	88.4	1.66702
		353.8	2.35532	353.8	-0.391259			88.45	-4.4365	88.45	3.1929
		354	2.6605	354	-2.22231			88.5	-3.2158	88.5	3.80325
		354.2	-0.0860831	354.2	-2.83267			88.55	-1.68992	88.55	4.10842
		354.4	-1.00161	354.4	-1.91714			88.6	-1.07957	88.6	5.6343
		354.6	3.57603	354.6	-1.91714			88.65	-0.77439	88.65	5.6343
		354.8	1.74497	354.8	-0.0860831			88.7	0.751489	88.7	4.4136
		355	-3.74819	355	-1.91714			88.75	2.27737	88.75	3.1929
		355.2	3.27085	355.2	-1.91714			88.8	3.1929	88.8	3.1929
		355.4	0.829444	355.4	-0.391259			88.85	4.10842	88.85	2.88772
		355.6	-0.0860831	355.6	-0.696435			88.9	4.4136	88.9	2.27737
		355.8	-0.0860831	355.8	-0.391259			88.95	5.02395	88.95	2.27737
		356	-0.0860831	356	0.524268			89	4.4136	89	3.49807
		356.2	2.35532	356.2	-1.30679			89.05	3.1929	89.05	4.4136
		356.4	2.6605	356.4	-2.83267			89.1	2.27737	89.1	3.80325
		356.6	1.4398	356.6	-0.696435			89.15	2.27737	89.15	3.1929
		356.8	0.829444	356.8	-0.391259			89.2	1.66702	89.2	3.1929
		357	-0.696435	357	0.219093			89.25	0.751489	89.25	3.1929
		357.2	-1.00161	357.2	-0.391259			89.3	1.36184	89.3	2.58254
		357.4	1.4398	357.4	-1.00161			89.35	1.05666	89.35	1.05666
		357.6	1.74497	357.6	-0.0860831			89.4	1.97219	89.4	-1.07957
		357.8	-1.61196	357.8	-1.30679			89.45	1.97219	89.45	-3.52097
		358	-0.0860831	358	-1.00161			89.5	0.751489	89.5	-3.2158
		358.2	1.13462	358.2	-1.30679			89.55	0.446313	89.55	-2.91062
		358.4	-0.0860831	358.4	0.829444			89.6	1.05666	89.6	-2.60544
		358.6	-1.30679	358.6	-0.0860831			89.65	2.58254	89.65	-1.99509
		358.8	-0.0860831	358.8	-3.13784			89.7	1.66702	89.7	-1.38474
		359	-1.00161	359	-0.696435			89.75	-0.164038	89.75	-0.469214
		359.2	-0.0860831	359.2	-4.9689			89.8	-1.99509	89.8	0.446313
		359.4	2.96567	359.4	-0.0860831			89.85	-1.07957	89.85	0.751489
		359.6	-0.0860831	359.6	-0.696435			89.9	-0.164038	89.9	0.446313
		359.8	-0.391259	359.8	-2.83267			89.95	-0.469214	89.95	-1.07957
		360	-3.13784	360	-2.52749			90	-0.164038	90	-1.99509
		360.2	0.524268	360.2	-1.30679			90.05	0.751489	90.05	-0.77439
		360.4	1.4398	360.4	-3.74819			90.1	-0.164038	90.1	0.141137
		360.6	0.219093	360.6	-0.391259			90.15	-1.07957	90.15	0.141137
		360.8	-1.91714	360.8	-2.52749			90.2	-0.469214	90.2	0.751489
		361	0.524268	361	-1.61196			90.25	-0.77439	90.25	1.05666
		361.2	-0.0860831	361.2	1.4398			90.3	-2.30027	90.3	-1.38474
		361.4	2.35532	361.4	-3.74819			90.35	-2.60544	90.35	-1.68992
		361.6	-1.00161	361.6	-0.391259			90.4	-1.68992	90.4	-1.07957
		361.8	0.829444	361.8	-1.00161			90.45	0.141137	90.45	-0.77439
		362	-0.0860831	362	-0.696435			90.5	1.05666	90.5	0.141137
		362.2	-1.00161	362.2	-3.74819			90.55	1.66702	90.55	0.446313
		362.4	-1.61196	362.4	-0.696435			90.6	2.88772	90.6	0.751489
		362.6	0.524268	362.6	0.524268			90.65	3.80325	90.65	1.36184
		362.8	-0.0860831	362.8	-3.13784			90.7	4.71877	90.7	3.1929
		363	-0.391259	363	-1.91714			90.75	5.6343	90.75	3.80325
		363.2	2.05015	363.2	-2.52749			90.8	5.02395	90.8	4.10842
		363.4	3.27085	363.4	-3.74819			90.85	3.1929	90.85	4.10842
		363.6	2.6605	363.6	0.524268			90.9	2.58254	90.9	4.71877
		363.8	-0.0860831	363.8	-1.00161			90.95	1.66702	90.95	4.10842
		364	0.524268	364	-3.44302			91	1.05666	91	3.49807
		364.2	1.13462	364.2	-0.0860831			91.05	1.97219	91.05	1.97219
		364.4	1.13462	364.4	-0.391259			91.1	2.58254	91.1	1.66702
		364.6	1.13462	364.6	-2.52749			91.15	1.97219	91.15	2.88772
		364.8	-0.391259	364.8	-0.0860831			91.2	3.1929	91.2	1.66702
		365	2.6605	365	1.4398			91.25	3.49807	91.25	0.141137
		365.2	2.05015	365.2	-2.83267			91.3	3.80325	91.3	-0.469214
		365.4	-2.52749	365.4	-2.22231			91.35	5.32913	91.35	-0.469214
		365.6	-0.391259	365.6	-3.13784			91.4	5.6343	91.4	-0.469214
		365.8	5.71226	365.8	-0.696435			91.45	4.71877	91.45	0.141137
		366	-0.0860831	366	-0.696435			91.5	3.80325	91.5	1.05666
		366.2	-0.696435	366.2	-1.00161			91.55	-0.164038	91.55	1.05666
		366.4	0.829444	366.4	-1.61196			91.6	-4.13132	91.6	0.751489
		366.6	-0.696435	366.6	0.829444			91.65	-5.6572	91.65	0.446313
		366.8	-0.0860831	366.8	-2.83267			91.7	-7.18308	91.7	1.05666
		367	0.829444	367	-0.391259			91.75	-7.18308	91.75	1.97219
		367.2	0.219093	367.2	-0.391259			91.8	-5.6572	91.8	2.58254
		367.4	-0.0860831	367.4	-1.30679			91.85	-2.30027	91.85	2.58254
		367.6	2.05015	367.6	-2.52749			91.9	1.66702	91.9	3.49807
		367.8	1.74497	367.8	-0.391259			91.95	4.10842	91.95	2.58254
		368	-2.22231	368	0.524268			92	3.49807	92	-0.164038
		368.2	2.05015	368.2	1.13462			92.05	2.58254	92.05	-3.52097
		368.4	0.524268	368.4	1.13462			92.1	2.27737	92.1	-5.35203
		368.6	3.57603	368.6	-0.0860831			92.15	2.27737	92.15	-4.13132
		368.8	1.13462	368.8	-1.30679			92.2	2.58254	92.2	-3.52097
		369	-0.696435	369	-2.83267			92.25	1.97219	92.25	-1.68992
		369.2	4.18638	369.2	1.4398			92.3	1.36184	92.3	-0.77439
		369.4	1.74497	369.4	-1.91714			92.35	0.751489	92.35	-0.469214
		369.6	-0.0860831	369.6	-1.00161			92.4	0.446313	92.4	0.751489
		369.8	2.6605	369.8	-0.391259			92.45	0.751489	92.45	2.27737
		370	-0.0860831	370	-1.91714			92.5	0.446313	92.5	3.1929
		370.2	2.6605	370.2	-0.0860831			92.55	0.751489	92.55	4.10842
		370.4	2.35532	370.4	0.829444			92.6	2.58254	92.6	4.71877
		370.6	0.524268	370.6	-2.83267			92.65	4.10842	92.65	5.02395
		370.8	2.96567	370.8	-1.91714			92.7	3.80325	92.7	4.10842
		371	0.829444	371	-1.30679			92.75	1.66702	92.75	1.97219
		371.2	1.4398	371.2	-2.83267			92.8	-1.68992	92.8	-0.77439
		371.4	0.524268	371.4	-0.391259			92.85	-3.82615	92.85	-1.99509
		371.6	0.829444	371.6	-3.13784			92.9	-5.96238	92.9	-2.60544
		371.8	0.524268	371.8	-1.00161			92.95	-5.96238	92.95	-2.30027
		372	2.35532	372	0.829444			93	-3.82615	93	-0.77439
		372.2	2.96567	372.2	-0.0860831			93.05	-2.60544	93.05	0.446313
		372.4	-0.696435	372.4	-2.52749			93.1	-1.38474	93.1	1.97219
		372.6	-3.44302	372.6	-0.391259			93.15	-0.77439	93.15	2.58254
		372.8	2.05015	372.8	-2.52749			93.2	-0.77439	93.2	1.97219
		373	-0.391259	373	0.829444			93.25	-1.07957	93.25	1.05666
		373.2	0.524268	373.2	-1.30679			93.3	-2.91062	93.3	1.66702
		373.4	-0.696435	373.4	0.219093			93.35	-4.13132	93.35	3.49807
		373.6	-1.91714	373.6	-4.05337			93.4	-3.2158	93.4	2.58254
		373.8	1.74497	373.8	-2.22231			93.45	-2.30027	93.45	1.05666
		374	0.829444	374	-0.0860831			93.5	-1.07957	93.5	-0.164038
		374.2	1.13462	374.2	-0.0860831			93.55	0.141137	93.55	-1.99509
		374.4	3.27085	374.4	-2.52749			93.6	1.66702	93.6	-2.91062
		374.6	2.05015	374.6	-2.22231			93.65	3.49807	93.65	-1.99509
		374.8	2.96567	374.8	1.4398			93.7	4.10842	93.7	-1.07957
		375	-0.696435	375	-0.0860831			93.75	4.10842	93.75	-1.07957
		375.2	0.524268	375.2	-1.91714			93.8	3.49807	93.8	-0.164038
		375.4	1.13462	375.4	0.829444			93.85	1.66702	93.85	1.05666
		375.6	-0.0860831	375.6	-1.30679			93.9	-0.77439	93.9	1.05666
		375.8	-4.35854	375.8	-1.91714			93.95	-2.30027	93.95	1.36184
		376	-1.00161	376	-1.00161			94	-2.60544	94	1.36184
		376.2	1.4398	376.2	-0.696435			94.05	-2.91062	94.05	1.97219
		376.4	4.79673	376.4	-1.61196			94.1	-1.68992	94.1	2.27737
		376.6	-0.391259	376.6	-1.91714			94.15	-0.164038	94.15	2.58254
		376.8	-1.30679	376.8	-1.30679			94.2	-0.77439	94.2	2.88772
		377	-1.00161	377	-2.22231			94.25	-2.30027	94.25	3.49807
		377.2	1.4398	377.2	-1.91714			94.3	-1.99509	94.3	4.10842
		377.4	3.27085	377.4	-1.61196			94.35	-1.38474	94.35	4.10842
		377.6	-2.22231	377.6	-3.13784			94.4	-0.77439	94.4	4.10842
		377.8	-1.61196	377.8	-1.00161			94.45	-1.68992	94.45	4.10842
		378	-0.0860831	378	-0.696435			94.5	-2.91062	94.5	2.88772
		378.2	-1.00161	378.2	-0.696435			94.55	-2.60544	94.55	2.58254
		378.4	-0.696435	378.4	-1.00161			94.6	-1.68992	94.6	1.97219
		378.6	-0.0860831	378.6	-1.61196			94.65	-0.77439	94.65	0.446313
		378.8	0.829444	378.8	-1.61196			94.7	-0.469214	94.7	-1.07957
		379	2.6605	379	-0.696435			94.75	-0.469214	94.75	-1.07957
		379.2	-0.696435	379.2	-3.13784			94.8	-1.07957	94.8	-1.07957
		379.4	-0.0860831	379.4	-0.0860831			94.85	-1.38474	94.85	-0.164038
		379.6	-1.00161	379.6	-1.00161			94.9	-2.91062	94.9	0.751489
		379.8	-0.0860831	379.8	-2.22231			94.95	-4.13132	94.95	0.446313
		380	-0.0860831	380	-1.30679			95	-4.13132	95	-1.38474
		380.2	-1.61196	380.2	-1.91714			95.05	-2.91062	95.05	-2.30027
		380.4	0.219093	380.4	-1.30679			95.1	-0.469214	95.1	-1.68992
		380.6	0.829444	380.6	-2.83267			95.15	0.446313	95.15	-1.07957
		380.8	-1.61196	380.8	-0.0860831			95.2	2.88772	95.2	-0.164038
		381	-0.391259	381	-2.22231			95.25	4.4136	95.25	1.05666
		381.2	-0.0860831	381.2	-1.91714			95.3	4.4136	95.3	2.58254
		381.4	-0.696435	381.4	-0.391259			95.35	3.1929	95.35	3.1929
		381.6	-2.22231	381.6	-3.13784			95.4	0.141137	95.4	3.49807
		381.8	0.524268	381.8	-0.696435			95.45	-1.99509	95.45	2.88772
		382	2.35532	382	-1.61196			95.5	-2.30027	95.5	1.97219
		382.2	-0.0860831	382.2	-0.391259			95.55	-2.30027	95.55	-0.164038
		382.4	-1.91714	382.4	0.219093			95.6	-2.91062	95.6	-2.91062
		382.6	-0.696435	382.6	-3.74819			95.65	-3.52097	95.65	-4.13132
		382.8	-0.0860831	382.8	-1.91714			95.7	-4.74167	95.7	-4.4365
		383	1.4398	383	-0.0860831			95.75	-5.96238	95.75	-4.13132
		383.2	2.05015	383.2	-0.391259			95.8	-5.35203	95.8	-3.52097
		383.4	0.524268	383.4	-1.00161			95.85	-5.35203	95.85	-1.68992
		383.6	2.35532	383.6	-1.30679			95.9	-4.74167	95.9	-1.68992
		383.8	1.13462	383.8	-0.391259			95.95	-3.82615	95.95	-2.60544
		384	-1.00161	384	-0.391259			96	-2.91062	96	-2.60544
		384.2	1.74497	384.2	-0.391259			96.05	-2.30027	96.05	-3.52097
		384.4	-0.0860831	384.4	-2.83267			96.1	-3.52097	96.1	-4.4365
		384.6	1.74497	384.6	-5.27407			96.15	-3.2158	96.15	-3.2158
		384.8	1.4398	384.8	-3.44302			96.2	-2.30027	96.2	-1.68992
		385	-1.61196	385	0.219093			96.25	-1.68992	96.25	-0.469214
		385.2	1.74497	385.2	-2.22231			96.3	-1.38474	96.3	0.446313
		385.4	4.49155	385.4	-1.30679			96.35	0.446313	96.35	1.36184
		385.6	-0.391259	385.6	-1.00161			96.4	2.58254	96.4	2.58254
		385.8	-0.0860831	385.8	2.05015			96.45	2.88772	96.45	3.80325
		386	2.6605	386	-2.22231			96.5	1.66702	96.5	3.49807
		386.2	-0.0860831	386.2	-0.696435			96.55	0.751489	96.55	4.10842
		386.4	-1.61196	386.4	1.13462			96.6	0.751489	96.6	4.4136
		386.6	-0.696435	386.6	-1.00161			96.65	0.751489	96.65	3.49807
		386.8	-0.391259	386.8	-0.0860831			96.7	1.05666	96.7	4.10842
		387	0.219093	387	-2.83267			96.75	1.05666	96.75	5.02395
		387.2	0.829444	387.2	-2.52749			96.8	2.58254	96.8	5.02395
		387.4	1.13462	387.4	-1.91714			96.85	4.28518	96.85	2.14895
		387.6	1.4398	387.6	-1.30679			96.9	5.65847	96.9	-3.80198
		387.8	-0.0860831	387.8	-2.52749			96.95	-44.6828	96.95	36.4939
		388	-2.22231	388	-3.13784			97	-102.272	97	86.9369
		388.2	0.219093	388.2	0.829444			97.05	-107.409	97.05	92.1758
		388.4	-0.696435	388.4	-1.61196			97.1	-84.3048	97.1	73.4711
		388.6	-2.52749	388.6	-1.00161			97.15	-56.3939	97.15	50.1124
		388.8	1.4398	388.8	-1.91714			97.2	-31.6493	97.2	29.0807
		389	-0.0860831	389	-1.91714			97.25	-9.91821	97.25	11.7493
		389.2	2.6605	389.2	-0.696435			97.3	6.75201	97.3	-0.572205
		389.4	2.35532	389.4	-1.91714			97.35	19.9	97.35	-10.9227
		389.6	-1.00161	389.6	-1.00161			97.4	30.1997	97.4	-19.544
		389.8	1.4398	389.8	-1.00161			97.45	36.0743	97.45	-24.9608
		390	-0.0860831	390	0.219093			97.5	38.9608	97.5	-27.2624
		390.2	-1.30679	390.2	-0.391259			97.55	39.8509	97.55	-27.2878
		390.4	-1.30679	390.4	0.219093			97.6	38.8463	97.6	-27.682
		390.6	-0.0860831	390.6	-3.13784			97.65	35.8836	97.65	-26.9826
		390.8	-0.391259	390.8	-1.30679			97.7	34.5866	97.7	-27.0589
		391	1.13462	391	-0.0860831			97.75	30.9372	97.75	-27.3514
		391.2	0.219093	391.2	-0.696435			97.8	26.3723	97.8	-26.4231
		391.4	3.27085	391.4	-2.83267			97.85	23.1298	97.85	-24.4776
		391.6	-0.391259	391.6	0.219093			97.9	20.2052	97.9	-22.5194
		391.8	-1.30679	391.8	-4.66372			97.95	18.4631	97.95	-20.9045
		392	-2.83267	392	-0.391259			98	16.6194	98	-18.781
		392.2	-4.05337	392.2	-0.0860831			98.05	14.0508	98.05	-16.1616
		392.4	-1.30679	392.4	-2.22231			98.1	11.1674	98.1	-14.7725
		392.6	-0.0860831	392.6	-0.391259			98.15	7.7872	98.15	-15.4062
		392.8	-0.0860831	392.8	-1.00161			98.2	5.85331	98.2	-13.6779
		393	-0.391259	393	-1.61196			98.25	3.15092	98.25	-10.582
		393.2	-0.391259	393.2	-4.35854			98.3	2.16823	98.3	-8.20775
		393.4	0.829444	393.4	-2.22231			98.35	2.15087	98.35	-6.39405
		393.6	0.829444	393.6	0.524268			98.4	0.315307	98.4	-2.73645
		393.8	2.6605	393.8	0.219093			98.45	-0.601394	98.45	0.314133
		394	-1.00161	394	-3.13784			98.5	-1.51723	98.5	0.924177
		394.2	-0.0860831	394.2	-0.696435			98.55	-1.82249	98.55	0.313745
		394.4	-1.30679	394.4	-3.13784			98.6	-2.12768	98.6	-1.21216
		394.6	-2.52749	394.6	-2.83267			98.65	-1.21216	98.65	-1.82251
		394.8	0.829444	394.8	-0.696435			98.7	1.8396	98.7	-1.21216
		395	-1.30679	395	-2.22231			98.75	2.75512	98.75	-0.601811
		395.2	-2.52749	395.2	-3.44302			98.8	2.14477	98.8	-1.82251
		395.4	-1.00161	395.4	-0.391259			98.85	2.14477	98.85	-3.95874
		395.6	1.4398	395.6	-2.83267			98.9	1.22924	98.9	-3.65357
		395.8	-1.61196	395.8	-2.83267			98.95	0.313716	98.95	-3.34839
		396	-2.52749	396	-0.696435			99	-0.296635	99	-4.26392
		396.2	1.4398	396.2	-0.696435			99.05	-1.21216	99.05	-4.5691
		396.4	0.829444	396.4	-0.0860831			99.1	-3.04322	99.1	-3.04322
		396.6	-2.52749	396.6	-1.61196			99.15	-3.04322	99.15	-2.73804
		396.8	-1.67517	396.8	-4.72693			99.2	-2.43287	99.2	-3.34839
		397	989.772	397	592.739			99.25	-3.65357	99.25	-3.95874
		397.2	-255.725	397.2	-28.9791			99.3	-5.17945	99.3	-2.73804
		397.4	-286.909	397.4	-126.997			99.35	-3.65357	99.35	-1.21216
		397.6	-146.982	397.6	-79.2334			99.4	-2.12769	99.4	-0.296635
		397.8	-144.757	397.8	-73.0405			99.45	-1.51734	99.45	0.618892
		398	-226.051	398	-114.357			99.5	0.313716	99.5	1.22924
		398.2	-323.472	398.2	-174.241			99.55	1.22924	99.55	2.75512
		398.4	-417.945	398.4	-223.548			99.6	0.924068	99.6	3.67065
		398.6	-508.354	398.6	-266.96			99.65	0.924068	99.65	3.67065
		398.8	-595.484	398.8	-307.398			99.7	2.14477	99.7	3.97583
		399	-667.327	399	-344.146			99.75	3.67065	99.75	4.58618
		399.2	-723.796	399.2	-375.896			99.8	4.281	99.8	3.0603
		399.4	-777.936	399.4	-395.551			99.85	3.97583	99.85	0.618892
[truncated: 7,203 more rows]

## Sheet: Fig 2C
Time (min)		minus70mV									CNCB2_M70_mean	sdev	count	CNCB2_M70_SEM		minus100mV							CNCB2_M100_mean	sdev	count	CNCB2_M100_SEM			CNCB2_M70_mean	CNCB2_M70_SEM	CNCB2_M100_mean	CNCB2_M100_SEM
0		1	1	1	1	1	1	1	1	1	1	0	9	0		1	1	1	1	1	1	1	1	0	7	0			1	0	1	0
0.05		0.999999	1	1	0.999997	1	1	1	1	0.999998	1	1.4522e-06	9	4.84067e-07		1	1	1	1	1	0.999999	1	1	8.55899e-07	7	3.23499e-07			1	4.84067e-07	1	3.23499e-07
0.1		0.994	1.0077	1.01032	0.990622	0.988403	0.984128	0.996373	0.977861	1.02383	0.997026	0.0144381	9	0.0048127		0.99784	0.986661	1.01419	0.999046	0.995109	1.00719	0.962566	0.994658	0.0166441	7	0.00629088			0.997026	0.0048127	0.994658	0.00629088
0.15		0.983332	1.00946	1.0147	0.981709	0.976612	0.972817	0.984297	0.966857	0.967987	0.984196	0.0170509	9	0.00568362		1.00196	0.996846	1.00845	0.99528	1.05594	1.00883	0.949443	1.00239	0.0311743	7	0.0117828			0.984196	0.00568362	1.00239	0.0117828
0.2		0.96492	0.993984	1.02052	0.969794	0.962219	0.960472	0.954214	0.965582	0.943181	0.970543	0.0231566	9	0.00771886		0.974783	0.973511	1.00782	0.998169	1.04139	1.00089	0.921462	0.98829	0.0372482	7	0.0140785			0.970543	0.00771886	0.98829	0.0140785
0.25		0.903037	0.892514	1.01666	0.964465	0.855771	0.903673	0.902791	0.839381	0.898989	0.908587	0.05341	9	0.0178033		0.898219	0.911551	0.975494	0.941309	0.96394	0.960665	0.871893	0.931867	0.0387132	7	0.0146322			0.908587	0.0178033	0.931867	0.0146322
0.3		0.86255	0.910055	1.00957	0.943792	0.824111	0.854719	0.860306	0.795063	0.880017	0.882243	0.0646003	9	0.0215334		0.857712	0.892057	0.9619	0.929284	0.949312	0.929658	0.823482	0.906201	0.0507242	7	0.0191719			0.882243	0.0215334	0.906201	0.0191719
0.35		0.79981	0.890992	0.990897	0.933099	0.771743	0.851131	0.841723	0.72976	0.864852	0.852667	0.0804401	9	0.0268134		0.824741	0.865523	0.940843	0.89644	0.96251	0.902756	0.782342	0.882165	0.0633314	7	0.023937			0.852667	0.0268134	0.882165	0.023937
0.4		0.768425	0.877871	0.971401	0.928566	0.755154	0.848699	0.826815	0.664274	0.843675	0.831653	0.0931273	9	0.0310424		0.81426	0.845271	0.935582	0.884002	0.951523	0.882544	0.749141	0.866046	0.0701384	7	0.0265098			0.831653	0.0310424	0.866046	0.0265098
0.45		0.750339	0.868763	0.945393	0.900368	0.739259	0.821455	0.806289	0.62105	0.817703	0.807847	0.0964231	9	0.032141		0.801431	0.812146	0.929274	0.880445	0.94096	0.853431	0.728882	0.84951	0.0752293	7	0.028434			0.807847	0.032141	0.84951	0.028434
0.5		0.712719	0.860423	0.943703	0.880561	0.688135	0.821637	0.786504	0.619649	0.819988	0.792591	0.102473	9	0.0341576		0.796341	0.773073	0.927743	0.865913	0.92956	0.828119	0.769477	0.841461	0.0681618	7	0.0257627			0.792591	0.0341576	0.841461	0.0257627
0.55		0.680861	0.861157	0.929849	0.873535	0.654246	0.745865	0.750417	0.5903	0.78632	0.763617	0.11129	9	0.0370965		0.801208	0.806094	0.906157	0.855092	0.939363	0.802809	0.773186	0.840558	0.0618829	7	0.0233895			0.763617	0.0370965	0.840558	0.0233895
0.6		0.664489	0.862687	0.913389	0.852197	0.618693	0.740453	0.740401	0.58914	0.75529	0.748527	0.11206	9	0.0373534		0.794316	0.842993	0.89566	0.854324	0.952314	0.796079	0.761026	0.842387	0.0660044	7	0.0249473			0.748527	0.0373534	0.842387	0.0249473
0.65		0.694574	0.855089	0.905722	0.833553	0.629742	0.73875	0.71211	0.549488	0.743208	0.740248	0.112231	9	0.0374102		0.792931	0.805546	0.884991	0.842994	0.940279	0.786192	0.763089	0.83086	0.0628723	7	0.0237635			0.740248	0.0374102	0.83086	0.0237635
0.7		0.636532	0.868235	0.903186	0.825969	0.607127	0.718438	0.711022	0.495449	0.743028	0.723221	0.131058	9	0.0436861		0.802821	0.772521	0.874456	0.844326	0.932487	0.778284	0.751534	0.822347	0.064742	7	0.0244702			0.723221	0.0436861	0.822347	0.0244702
0.75		0.641231	0.867723	0.89634	0.812036	0.593365	0.710107	0.692028	0.474177	0.746121	0.714792	0.134804	9	0.0449347		0.805722	0.759167	0.878585	0.819976	0.936682	0.763328	0.725438	0.8127	0.0738603	7	0.0279166			0.714792	0.0449347	0.8127	0.0279166
0.8		0.62681	0.882438	0.8844	0.808749	0.576857	0.668937	0.669804	0.47119	0.73652	0.702856	0.139251	9	0.0464168		0.800458	0.753846	0.867514	0.797935	0.911095	0.756731	0.713182	0.800109	0.0688531	7	0.026024			0.702856	0.0464168	0.800109	0.026024
0.85		0.63272	0.883197	0.868252	0.797617	0.577761	0.655254	0.654678	0.455241	0.731936	0.695184	0.139482	9	0.046494		0.790705	0.723256	0.852925	0.787061	0.893594	0.744742	0.699331	0.784516	0.069778	7	0.0263736			0.695184	0.046494	0.784516	0.0263736
0.9		0.567439	0.895261	0.847279	0.785227	0.567278	0.629227	0.639475	0.444154	0.708656	0.675999	0.146325	9	0.0487752		0.791084	0.712272	0.860744	0.784883	0.902694	0.73337	0.679409	0.780637	0.0802053	7	0.0303147			0.675999	0.0487752	0.780637	0.0303147
0.95		0.588391	0.908839	0.822469	0.79611	0.539511	0.622841	0.63977	0.433574	0.70186	0.672596	0.149946	9	0.0499821		0.797637	0.746734	0.836828	0.812844	0.921837	0.714904	0.675308	0.786585	0.0823993	7	0.031144			0.672596	0.0499821	0.786585	0.031144
1		0.57988	0.915309	0.815294	0.791256	0.543985	0.62126	0.614612	0.399512	0.688715	0.663314	0.157538	9	0.0525127		0.803373	0.783743	0.848961	0.809808	0.874461	0.701345	0.664175	0.783695	0.0759757	7	0.0287161			0.663314	0.0525127	0.783695	0.0287161
1.05		0.549352	0.920806	0.792193	0.793333	0.521242	0.590732	0.614086	0.377971	0.671	0.647857	0.165835	9	0.0552783		0.805193	0.81267	0.838785	0.80632	0.855358	0.68955	0.654964	0.780406	0.07675	7	0.0290088			0.647857	0.0552783	0.780406	0.0290088
1.1		0.540487	0.913908	0.764077	0.785061	0.509402	0.615969	0.594827	0.364275	0.649721	0.637525	0.164736	9	0.0549121		0.785854	0.823831	0.82328	0.802714	0.849866	0.67905	0.630224	0.770689	0.0829081	7	0.0313363			0.637525	0.0549121	0.770689	0.0313363
1.15		0.521809	0.915808	0.749002	0.771034	0.501907	0.596266	0.593806	0.36068	0.654072	0.629376	0.165608	9	0.0552027		0.781267	0.819963	0.815774	0.799867	0.830095	0.662335	0.621175	0.761496	0.0841192	7	0.0317941			0.629376	0.0552027	0.761496	0.0317941
1.2		0.531118	0.919213	0.746178	0.766215	0.497174	0.574435	0.575647	0.384926	0.641047	0.626217	0.161714	9	0.0539048		0.762336	0.827321	0.797027	0.786313	0.838293	0.649539	0.607322	0.752593	0.0893113	7	0.0337565			0.626217	0.0539048	0.752593	0.0337565
1.25		0.539896	0.915053	0.740851	0.76002	0.509224	0.595111	0.564949	0.443351	0.632747	0.633467	0.147199	9	0.0490663		0.781759	0.886917	0.782603	0.83717	0.889288	0.662066	0.623991	0.780542	0.104002	7	0.0393091			0.633467	0.0490663	0.780542	0.0393091
1.3		0.526745	0.915753	0.738102	0.759902	0.548298	0.608611	0.595735	0.423014	0.638929	0.639454	0.146331	9	0.048777		0.78269	0.882994	0.801935	0.858388	0.895386	0.664373	0.614529	0.785757	0.108837	7	0.0411366			0.639454	0.048777	0.785757	0.0411366
1.35		0.534724	0.913443	0.736392	0.750134	0.591362	0.566164	0.609194	0.50983	0.63609	0.649704	0.128527	9	0.0428424		0.78109	0.893835	0.795063	0.875293	0.915759	0.648691	0.606841	0.788081	0.120738	7	0.0456348			0.649704	0.0428424	0.788081	0.0456348
1.4		0.590046	0.914713	0.730917	0.738172	0.586209	0.607152	0.613716	0.456533	0.628817	0.651808	0.128967	9	0.042989		0.791294	0.891332	0.785656	0.886013	0.890002	0.636531	0.593687	0.782074	0.123261	7	0.0465882			0.651808	0.042989	0.782074	0.0465882
1.45		0.555854	0.901773	0.728938	0.730398	0.599471	0.561299	0.619212	0.459215	0.62417	0.642259	0.128862	9	0.0429541		0.809906	0.884157	0.784843	0.885283	0.891068	0.635178	0.588777	0.782745	0.124281	7	0.0469736			0.642259	0.0429541	0.782745	0.0469736
1.5		0.534576	0.903933	0.72429	0.738706	0.600909	0.583435	0.621791	0.460022	0.611053	0.642079	0.130323	9	0.043441		0.820468	0.881309	0.780504	0.885699	0.927008	0.626975	0.571628	0.784799	0.136235	7	0.0514919			0.642079	0.043441	0.784799	0.0514919
1.55		0.581978	0.89529	0.722283	0.716941	0.616496	0.605145	0.64167	0.43459	0.608237	0.646959	0.125383	9	0.0417942		0.834084	0.914044	0.785727	0.903471	0.924195	0.622002	0.578435	0.794565	0.14205	7	0.05369			0.646959	0.0417942	0.794565	0.05369
1.6		0.560198	0.89207	0.727726	0.714116	0.62215	0.592435	0.631527	0.465326	0.609644	0.646132	0.120853	9	0.0402843		0.833548	0.899843	0.783209	0.888847	0.920756	0.61497	0.577701	0.788411	0.139382	7	0.0526815			0.646132	0.0402843	0.788411	0.0526815
1.65		0.554258	0.884035	0.727294	0.711636	0.610972	0.589881	0.632406	0.485766	0.616607	0.645873	0.115701	9	0.0385671		0.829699	0.900338	0.764012	0.87724	0.930023	0.597892	0.584451	0.783379	0.141711	7	0.0535617			0.645873	0.0385671	0.783379	0.0535617
1.7		0.549471	0.888002	0.719803	0.714484	0.602556	0.6302	0.631782	0.50191	0.60816	0.649596	0.113157	9	0.0377191		0.802404	0.889658	0.800865	0.893636	0.925822	0.600316	0.590293	0.786142	0.138534	7	0.052361			0.649596	0.0377191	0.786142	0.052361
1.75			0.8759	0.718433	0.701453	0.615931	0.593226	0.632409	0.496513	0.602808	0.654584	0.11255	8	0.0397924		0.783813	0.873955	0.798935	0.892369	0.928582	0.583609	0.584406	0.777953	0.141834	7	0.0536081			0.654584	0.0397924	0.777953	0.0536081
1.8			0.876496	0.71312	0.697798	0.605561	0.605145	0.61899	0.497534	0.611591	0.653279	0.111581	8	0.0394499		0.762747	0.871741	0.807102	0.85741	0.904025	0.585449	0.573146	0.765946	0.135449	7	0.0511949			0.653279	0.0394499	0.765946	0.0511949
1.85			0.871942	0.70424	0.682489	0.591184	0.598395	0.625121	0.498855	0.616144	0.648546	0.109526	8	0.0387232		0.864804	0.856606	0.80868	0.884232	0.922621	0.579921	0.566061	0.783275	0.147656	7	0.0558088			0.648546	0.0387232	0.783275	0.0558088
1.9			0.869518	0.71378	0.685515	0.595853	0.585137	0.620127	0.473146	0.614549	0.644703	0.115794	8	0.0409395		0.874253	0.848537	0.808208	0.874604	0.91135	0.574684	0.568567	0.780029	0.145738	7	0.0550839			0.644703	0.0409395	0.780029	0.0550839
1.95			0.867853	0.705601	0.677279	0.599826	0.603685	0.606199		0.612906	0.667621	0.0975354	7	0.0368649		0.829692	0.848136	0.807854	0.864571	0.895785	0.557701	0.563061	0.766686	0.143576	7	0.0542667			0.667621	0.0368649	0.766686	0.0542667
2			0.861714	0.699972	0.680708	0.597969	0.555096	0.606188		0.614882	0.659504	0.10206	7	0.0385751		0.828852	0.858496	0.824427	0.866227	0.888701	0.548358	0.564035	0.768442	0.146707	7	0.0554499			0.659504	0.0385751	0.768442	0.0554499
2.05				0.692314	0.673481	0.58482	0.553697	0.612677		0.608089	0.620846	0.0527529	6	0.0215363		0.841651	0.859553	0.823245	0.890585	0.866874	0.545264	0.531326	0.7655	0.156654	7	0.0592098			0.620846	0.0215363	0.7655	0.0592098
2.1				0.685292	0.670965	0.578537	0.540927	0.597569		0.620603	0.615649	0.0551763	6	0.0225257		0.819795	0.856162	0.838738	0.863881	0.855249	0.546339	0.500254	0.754345	0.15905	7	0.0601151			0.615649	0.0225257	0.754345	0.0601151
2.15				0.67839	0.674466	0.572075	0.519034	0.594817		0.609203	0.607998	0.0612425	6	0.0250021		0.80828	0.897157	0.840504	0.859089	0.864479	0.536852	0.545208	0.76451	0.154998	7	0.0585838			0.607998	0.0250021	0.76451	0.0585838
2.2				0.678251	0.667013	0.554775	0.556434	0.585615		0.614029	0.609353	0.0537328	6	0.0219363		0.799704	0.88591	0.855632	0.872003	0.883827	0.53616	0.523537	0.765253	0.163442	7	0.0617752			0.609353	0.0219363	0.765253	0.0617752
2.25				0.675228	0.649769	0.550366	0.532352	0.583454		0.60687	0.599673	0.055671	6	0.0227276		0.798085	0.885149	0.88281	0.86872	0.863689	0.531932	0.547988	0.768339	0.158768	7	0.0600087			0.599673	0.0227276	0.768339	0.0600087
2.3				0.662303	0.640097	0.553887	0.527426	0.579321		0.595595	0.593105	0.0510774	6	0.0208523		0.802848	0.881373	0.890581	0.876492	0.866671	0.523974	0.536409	0.768336	0.165218	7	0.0624467			0.593105	0.0208523	0.768336	0.0624467
2.35				0.595681		0.558765	0.519582	0.583048		0.60581	0.572577	0.0344496	5	0.0154063		0.783861	0.878179	0.895213	0.86456		0.515044		0.787372	0.158121	5	0.0707137			0.572577	0.0154063	0.787372	0.0707137
2.4				0.506446			0.529312			0.59751							0.882399	0.953208	0.866968
2.45				0.486123
2.5				0.469757
				0.457672
				0.453669
				0.443484
				0.436462
				0.427884
				0.414434
				0.412883

## Sheet: Fig 3A
Time(min)		30 uM NNCB-2					100 uM NNCB-2						100 uM CNCB-2					300 uM CNCB-2
0.1667		1	1	1	1		1	1	1	1			1	1	1	1		1	1	1	1	1
0.3333		0.9824	1.0012	1.0334	0.9979		1.0226	0.9123	0.9608	1.0564			1.019	0.986	1.1253	0.9608		0.9949	1.0196	1.0197	1.0267	0.9745
0.5		0.9531	0.992	1.0068	0.939		0.9934	0.8705	0.9257	0.9962			1.0538	0.9789	1.0711	0.9377		0.9976	1.0064	1.0061	1.0487	0.9453
0.6667		0.932	0.9895	0.9808	0.9563		0.9841	0.8307	0.8521	1.0316			1.0481	0.9629	1.0631	0.9294		0.9782	0.9741	1.0007	1.0162	0.948
0.8333		0.9112	0.9851	0.9446	0.8981		0.9902	0.8173	0.8845	1.0509			1.0413	0.9367	1.116	0.9102		0.9811	0.9459	0.9896	0.9855	0.902
3.8333		0.4931	0.4324	0.0069576	0.405		-0.0041758	-0.3785	0.1429	0.3664			0.2967	0.4684	0.2482	0.3123		-0.0186	-0.0216	-0.00118	-0.0824	-0.0558
4		0.37	0.3308	0.006991	0.322		-0.0047148	-0.3738	0.0988	0.2834			0.223	0.3908	0.1108	0.2085		-0.0203	-0.0327	0.00711	-0.0859	-0.059
4.1667		0.3244	0.2813	0.0068019	0.2379		-0.0042528	-0.3765	0.0863	0.2682			0.1791	0.3369	0.037	0.1471		-0.0246	-0.0318	-0.0226	-0.081	-0.0613
4.3333		0.3035	0.255	0.0084815	0.1938		-0.0049224	-0.3505	0.0787	0.2126			0.149	0.294	0.0276	0.1202		-0.0276	-0.0372	-0.0251	-0.0938	-0.0639
4.5		0.2819	0.2376	0.004181	0.1819		-0.0043488	-0.3183	0.0723	0.2201			0.1251	0.2549	-0.0421	0.0933		-0.0346	-0.0357	-0.0354	-0.1019	-0.0773
7.5		1.0096	0.854	0.5498	1.0346		0.8703	1.0703	0.6733	0.6171			0.1987	0.3782	0.2356	0.312		-0.0458	-0.0401	-0.0256	-0.1459	-0.2837
7.6667		0.9537	0.8125	0.4612	0.9104		0.7683	0.8786	0.6413	0.5658			0.1664	0.3372	0.1423	0.229		-0.0431	-0.0469	-0.0298	-0.1454	-0.3017
7.8333		0.9237	0.7847	0.4219	0.8605		0.7505	0.8904	0.65	0.6069			0.1357	0.312	0.0987	0.1851		-0.0381	-0.0539	-0.0311	-0.1483	-0.1151
8		0.901	0.7592	0.4093	0.866		0.723	0.8546	0.6333	0.5799			0.1312	0.2958	0.0419	0.1525		-0.0411	-0.0538	-0.043	-0.1312	-0.1093
8.1667		0.8824	0.7023	0.3977	0.817		0.7128	0.8895	0.6366	0.5507			0.1275	0.2742	0.0278	0.126		-0.0369	-0.0582	-0.0407	-0.1386	-0.1061

## Sheet: Fig 3B
	internal 300 uM			Mean	StDev	N Number	SEM
	1	1	1	1	0	3	0
	0.8678	0.8343	0.8255	0.842533	0.0223196	3	0.0128862
	0.7868	0.7661	0.7529	0.7686	0.0170877	3	0.0098656
	0.7302	0.6916	0.6917	0.7045	0.0222569	3	0.01285
	0.6867	0.6457	0.6248	0.6524	0.0314892	3	0.0181803
	0.6461	0.5876	0.5717	0.6018	0.03918	3	0.0226206
	0.6084	0.5497	0.5484	0.568833	0.0342719	3	0.0197869
	0.5808	0.5312	0.5141	0.542033	0.0346445	3	0.020002
	0.5584	0.4967	0.4737	0.5096	0.0437987	3	0.0252872
	0.5387	0.4686	0.4182	0.475167	0.0605178	3	0.03494
	0.5153	0.4411	0.3923	0.449567	0.0619356	3	0.0357585
	0.4908	0.4168	0.375	0.427533	0.0586414	3	0.0338566
	0.4722	0.4159	0.3461	0.4114	0.0631703	3	0.0364714
	0.4557	0.3908	0.307	0.3845	0.0745499	3	0.0430414
	0.4486	0.3806	0.2954	0.374867	0.0767608	3	0.0443178
	0.4294	0.3593	0.2771	0.355267	0.0762301	3	0.0440115
	0.4151	0.3524	0.2726	0.3467	0.0714208	3	0.0412348
	0.404	0.3384	0.27	0.337467	0.0670049	3	0.0386853
	0.3957	0.3216	0.249	0.3221	0.0733513	3	0.0423494
	0.3843	0.3074	0.2346	0.308767	0.0748594	3	0.0432201
	0.3748	0.2919	0.2195	0.2954	0.0777091	3	0.0448654
	0.3641	0.2829	0.2037	0.283567	0.0802021	3	0.0463047
	0.3585	0.2652	0.1897	0.271133	0.0845563	3	0.0488186
	0.3479	0.248	0.1799	0.2586	0.0845001	3	0.0487862
	0.3357	0.2551	0.1758	0.255533	0.0799509	3	0.0461597
	0.3332	0.2336	0.2039	0.2569	0.0677258	3	0.0391015
	0.323	0.2235	0.2117	0.252733	0.0611381	3	0.0352981
	0.3156	0.2104	0.2155	0.247167	0.0593198	3	0.0342483
	0.3053	0.2135	0.2056	0.241467	0.0554222	3	0.031998
	0.2938	0.2045	0.2021	0.233467	0.052264	3	0.0301746
	0.2906	0.1953	0.1858	0.2239	0.0579589	3	0.0334626
	0.2851	0.1877	0.1763	0.216367	0.0597971	3	0.0345239
	0.2774	0.1764	0.1689	0.207567	0.0605936	3	0.0349837
	0.2673	0.1742	0.1561	0.1992	0.0596667	3	0.0344486
	0.2622	0.1689	0.15	0.1937	0.0600707	3	0.0346818
	0.2611	0.1598	0.1424	0.187767	0.0641017	3	0.0370091
	0.2569	0.1557	0.1473	0.186633	0.0609975	3	0.0352169
	0.2498	0.1465	0.134	0.176767	0.0635568	3	0.0366945
	0.2489	0.156	0.1327	0.1792	0.0614759	3	0.0354931
	0.2459	0.1397	0.1233	0.169633	0.0665559	3	0.0384261
	0.2334	0.1378	0.1193	0.1635	0.0612378	3	0.0353557
	0.2307	0.1335	0.1158	0.16	0.0618643	3	0.0357174
	0.2303	0.1273	0.1153	0.157633	0.0632166	3	0.0364981
	0.2248	0.1245	0.1145	0.1546	0.0610002	3	0.0352185
	0.2234	0.1217	0.1074	0.150833	0.06325	3	0.0365174
	0.2182	0.1139	0.0987	0.1436	0.065051	3	0.0375572
	0.2147	0.1128	0.0981	0.141867	0.0635023	3	0.0366631
	0.2133	0.1124	0.0948	0.140167	0.0639438	3	0.0369179
	0.2048	0.1014	0.0874	0.1312	0.0641227	3	0.0370213
	0.2037	0.1126	0.0896	0.1353	0.0603421	3	0.0348385
	0.1994	0.1049	0.0861	0.130133	0.0607187	3	0.035056
	0.1987	0.0905	0.078	0.1224	0.0663727	3	0.0383203
	0.1957	0.0907	0.0777	0.121367	0.0647019	3	0.0373556
	0.1917	0.095	0.0737	0.120133	0.0628869	3	0.0363078
	0.1889	0.0929	0.0718	0.117867	0.0624148	3	0.0360352
	0.1847	0.0875	0.0707	0.1143	0.0615441	3	0.0355325
	0.1833	0.084	0.0653	0.110867	0.0634221	3	0.0366168
	0.181	0.0833	0.0653	0.109867	0.0622572	3	0.0359442
	0.1774	0.0789	0.0602	0.1055	0.0629653	3	0.036353
	0.17	0.0716	0.0585	0.100033	0.0609459	3	0.0351871
	0.1697	0.0743	0.0586	0.100867	0.0601261	3	0.0347138
	0.1683	0.0778	0.0567	0.100933	0.0592875	3	0.0342296
	0.1735	0.0647	0.0548	0.0976667	0.0658599	3	0.0380242
	0.1675	0.0681	0.0523	0.0959667	0.0624514	3	0.0360563
	0.1599	0.0648	0.0505	0.0917333	0.0594655	3	0.0343324
	0.162	0.0678	0.0467	0.0921667	0.0613907	3	0.035444
	0.156	0.065	0.0486	0.0898667	0.0578572	3	0.0334039
	0.1535	0.0643	0.0457	0.0878333	0.0576244	3	0.0332695
	0.1552	0.0563	0.0457	0.0857333	0.0603929	3	0.0348679
	0.1533	0.0635	0.0433	0.0867	0.0585549	3	0.0338067
	0.1483	0.0583	0.0416	0.0827333	0.0573931	3	0.0331359
	0.1504	0.0567	0.0406	0.0825667	0.0592944	3	0.0342336
	0.1488	0.0509	0.0378	0.0791667	0.0606589	3	0.0350214
	0.1442	0.0531	0.0387	0.0786667	0.0572084	3	0.0330293
	0.1469	0.0494	0.0374	0.0779	0.0600562	3	0.0346735
	0.1427	0.045	0.0331	0.0736	0.0601374	3	0.0347204
	0.143	0.048	0.0334	0.0748	0.0595124	3	0.0343595
	0.1425	0.0414	0.0341	0.0726667	0.0605875	3	0.0349802
	0.1424	0.0387	0.0297	0.0702667	0.0626312	3	0.0361601
	0.14	0.0305	0.0304	0.0669667	0.0632487	3	0.0365167
	0.1391	0.0374	0.0281	0.0682	0.061577	3	0.0355515
	0.1381	0.0332	0.0273	0.0662	0.0623371	3	0.0359903
	0.1389	0.002739	0.0282	0.056613	0.0723908	3	0.0417948
	0.1326	0.004341	0.027	0.054647	0.0684533	3	0.0395216
	0.1345	0.0324	0.0256	0.0641667	0.0610053	3	0.0352214
	0.1337	0.0336	0.0255	0.0642667	0.0602673	3	0.0347953
	0.1323	0.0345	0.0262	0.0643333	0.059007	3	0.0340677
	0.1338	0.0326	0.0233	0.0632333	0.0612892	3	0.0353853
	0.1291	0.0325	0.0209	0.0608333	0.0594045	3	0.0342972
	0.1358	0.0268	0.0213	0.0613	0.0645775	3	0.0372838
	0.1367	0.0288	0.0214	0.0623	0.0645384	3	0.0372613
	0.1341	0.0211	0.0193	0.0581667	0.0657664	3	0.0379702
	0.1311	0.0264	0.018	0.0585	0.0630136	3	0.0363809
	0.1283	0.0249	0.0166	0.0566	0.0622325	3	0.03593
	0.1317	0.0243	0.0165	0.0575	0.0643773	3	0.0371683
	0.1329	0.0265	0.0175	0.0589667	0.0641861	3	0.0370579
	0.1304	0.0223	0.0187	0.0571333	0.0634763	3	0.0366481
	0.1315	0.0225	0.0165	0.0568333	0.0647328	3	0.0373735
	0.1306	0.0185	0.0157	0.0549333	0.0655442	3	0.037842
	0.133	0.0176	0.0164	0.0556667	0.0669753	3	0.0386682
	0.1325	0.0163	0.0139	0.0542333	0.0677915	3	0.0391395
	0.1304	0.0137	0.0147	0.0529333	0.06709	3	0.0387344
	0.1279	0.0207	0.0145	0.0543667	0.0637571	3	0.0368102
	0.1314	0.0141	0.0142	0.0532333	0.0676943	3	0.0390833
	0.1298	0.0118	0.0136	0.0517333	0.0676137	3	0.0390368
	0.1347	0.0157	0.0125	0.0543	0.0696468	3	0.0402106
	0.1314	0.0121	0.0123	0.0519333	0.0688202	3	0.0397334
	0.135	0.005014	0.0102	0.0500713	0.0735961	3	0.0424907
	0.13	0.007106	0.0105	0.049202	0.0699937	3	0.0404109
	0.1276	0.005002	0.0112	0.047934	0.0690623	3	0.0398732
	0.1293	0.005451	0.009735	0.048162	0.0703002	3	0.0405878
	0.1294	0.006389	0.008941	0.0482433	0.0702953	3	0.040585
	0.1295	0.007252	0.009218	0.0486567	0.0700193	3	0.0404257
	0.1303	0.006875	0.008955	0.04871	0.0706667	3	0.0407994
	0.1231	0.004146	0.008302	0.0451827	0.0675104	3	0.0389771
	0.1265	-0.00346	0.006968	0.043336	0.0722106	3	0.0416908
	0.1225	0.000271	0.007475	0.0434153	0.068584	3	0.039597
	0.1258	-0.00309	0.007881	0.0435303	0.0714585	3	0.0412566
	0.1203	0.002495	0.005801	0.0428653	0.0670808	3	0.0387291
	0.1259	-0.00191	0.005826	0.043272	0.0716624	3	0.0413743
	0.1158	-0.00296	0.006723	0.0398543	0.0659488	3	0.0380756
	0.1187	-0.00401	0.006693	0.040461	0.067968	3	0.0392413
	0.1193	-0.00509	0.005484	0.039898	0.0689671	3	0.0398182
	0.1164	-0.00734	0.006113	0.038391	0.0678918	3	0.0391974
	0.1208	-0.00192	0.005699	0.0415263	0.0687586	3	0.0396978
	0.1133	-0.00446	0.005048	0.0379627	0.065417	3	0.0377685
	0.1142	-0.00728	0.003484	0.0368013	0.0672449	3	0.0388239
	0.1156	-0.0052	0.003982	0.0381273	0.0672502	3	0.0388269
	0.1129	-0.00613	0.003983	0.0369177	0.0659966	3	0.0381032
	0.1089	-0.00518	0.004264	0.0359947	0.0633142	3	0.0365545
	0.1109	-0.00516	0.003469	0.036403	0.0646604	3	0.0373317
	0.1118	-0.00886	0.003255	0.0353983	0.0664425	3	0.0383606
	0.111	-0.0129	0.002261	0.0334537	0.0675836	3	0.0390194
	0.11	-0.0122	0.002092	0.0332973	0.0668097	3	0.0385726
	0.1086	-0.00778	0.002977	0.034599	0.064312	3	0.0371306
	0.1102	-0.0119	0.00282	0.0337067	0.0666528	3	0.038482
	0.1086	-0.0105	0.002827	0.0336423	0.0652563	3	0.0376758
	0.1055	-0.0169	0.003016	0.0305387	0.0656777	3	0.037919
	0.1062	-0.0101	0.002192	0.032764	0.0638937	3	0.0368891
	0.1049	-0.0157	0.00306	0.0307533	0.0648944	3	0.0374668
	0.1039	-0.014	0.002406	0.0307687	0.0638626	3	0.0368711
	0.1016	-0.0163	0.002315	0.029205	0.063383	3	0.0365942
	0.1061	-0.0197	0.001983	0.029461	0.067251	3	0.0388274
	0.1038	-0.0149	0.001146	0.0300153	0.0644011	3	0.037182
	0.1057	-0.018	0.002153	0.029951	0.0663699	3	0.0383187
	0.102	-0.0159	0.000627	0.028909	0.0638358	3	0.0368556
	0.1039	-0.0188	0.000358	0.028486	0.0660092	3	0.0381104
	0.1009	-0.0176	0.000573	0.0279577	0.0638201	3	0.0368465
	0.0986	-0.0169	-0.00072	0.0269933	0.0625387	3	0.0361067
	0.0955	-0.0182	-0.00068	0.02554	0.0612171	3	0.0353437
	0.0951	-0.0183	1.35e-05	0.0256045	0.0608775	3	0.0351476
	0.0962	-0.0194	1.96e-05	0.0256065	0.061902	3	0.0357391
	0.095	-0.0226	0.000244	0.0242147	0.0623569	3	0.0360018
	0.0943	-0.0232	-0.00051	0.02353	0.0623298	3	0.0359861
	0.0938	-0.0233	0.00011	0.0235367	0.0619654	3	0.0357757
	0.0927	-0.0222	-0.00073	0.0232567	0.0610903	3	0.0352705
	0.0895	-0.0199	-0.00068	0.0229733	0.0584098	3	0.0337229
	0.0926	-0.0245	-0.00019	0.0226367	0.0617972	3	0.0356786
	0.0896	-0.0262	-0.00065	0.0209167	0.0608379	3	0.0351248
	0.0871	-0.0238	-0.00011	0.0210633	0.0584032	3	0.0337191
	0.0892	-0.0241	-0.00087	0.02141	0.0598458	3	0.034552
	0.0866	-0.0244	-0.00138	0.0202733	0.0585824	3	0.0338226
	0.0907	-0.0236	-0.00153	0.0218567	0.0606327	3	0.0350063
	0.0859	-0.0248	-0.00163	0.0198233	0.058385	3	0.0337086
	0.0853	-0.0237	-0.00107	0.0201767	0.0575223	3	0.0332105
	0.0824	-0.0269	-0.00127	0.0180767	0.0571607	3	0.0330017
	0.0854	-0.0231	-0.00114	0.0203867	0.0573638	3	0.033119
	0.0815	-0.0233	-0.00161	0.0188633	0.0553184	3	0.0319381
	0.0868	-0.0234	-0.00174	0.0205533	0.0583845	3	0.0337083
	0.0812	-0.0246	-0.00237	0.0180767	0.0557849	3	0.0322075
	0.0803	-0.0267	-0.00181	0.0172633	0.0559919	3	0.0323269
	0.0803	-0.0302	-0.00208	0.0160067	0.0574274	3	0.0331557
	0.0812	-0.0268	-0.00151	0.01763	0.0564868	3	0.0326126
	0.0804	-0.0269	-0.00266	0.0169467	0.0562729	3	0.0324892
	0.0777	-0.0272	-0.00158	0.0163067	0.0546896	3	0.0315751
	0.0831	-0.0248	-0.00188	0.0188067	0.0568468	3	0.0328205
	0.0784	-0.0269	-0.0022	0.0164333	0.0550674	3	0.0317932
	0.0792	-0.0293	-0.00258	0.0157733	0.0565305	3	0.0326379
	0.0769	-0.0285	-0.0018	0.0155333	0.0547962	3	0.0316366
	0.0788	-0.0333	-0.00169	0.0146033	0.0577988	3	0.0333702
	0.0769	-0.0302	-0.00257	0.01471	0.0556017	3	0.0321017
	0.0753	-0.0283	-0.00237	0.0148767	0.0539103	3	0.0311252
	0.0754	-0.0299	-0.00262	0.0142933	0.0546495	3	0.0315519
	0.0751	-0.0265	-0.00262	0.0153267	0.0531244	3	0.0306714
	0.0751	-0.0267	-0.00264	0.0152533	0.0532066	3	0.0307188
	0.0717	-0.0286	-0.00167	0.01381	0.0519109	3	0.0299708
	0.0723	-0.0296	-0.00238	0.01344	0.0527599	3	0.0304609
	0.0712	-0.0316	-0.00181	0.0125967	0.0528926	3	0.0305375
	0.0731	-0.0272	-0.002	0.0146333	0.0521778	3	0.0301249
	0.0729	-0.0269	-0.00179	0.0147367	0.051912	3	0.0299714
	0.0738	-0.0292	-0.00237	0.0140767	0.0534333	3	0.0308497
	0.0705	-0.0279	-0.00259	0.0133367	0.0510968	3	0.0295008
	0.0724	-0.0233	-0.00317	0.01531	0.0504555	3	0.0291305
	0.0702	-0.0278	-0.00317	0.0130767	0.0509801	3	0.0294333
	0.0662	-0.0271	-0.00305	0.0120167	0.0484404	3	0.0279671
	0.0685	-0.0265	-0.00295	0.0130167	0.0494717	3	0.0285625
	0.0646	-0.0282	-0.00254	0.0112867	0.0479202	3	0.0276667
	0.0651	-0.0255	-0.00253	0.0123567	0.0470988	3	0.0271925
	0.0631	-0.0275	-0.00239	0.01107	0.0467757	3	0.027006
	0.0641	-0.0285	-0.00236	0.01108	0.0477406	3	0.0275631
	0.0654	-0.0255	-0.00327	0.01221	0.0473859	3	0.0273583
	0.0639	-0.0217	-0.00297	0.0130767	0.0449996	3	0.0259805
	0.0632	-0.0265	-0.00282	0.0112933	0.0464856	3	0.0268385
	0.0657	-0.023	-0.00305	0.0132167	0.0465336	3	0.0268662
	0.0648	-0.0247	-0.00352	0.0121933	0.0467733	3	0.0270046
	0.0645	-0.0233	-0.00251	0.0128967	0.0458828	3	0.0264905
	0.0629	-0.0217	-0.00276	0.0128133	0.044398	3	0.0256332
	0.0625	-0.0221	-0.00282	0.0125267	0.0443388	3	0.025599
	0.0609	-0.0193	-0.0026	0.013	0.0423147	3	0.0244304
	0.0614	-0.0168	-0.00229	0.0141033	0.0415977	3	0.0240164
	0.0615	-0.0127	-0.00207	0.0155767	0.0401244	3	0.0231658
	0.0602	-0.0087	-0.00341	0.01603	0.0383437	3	0.0221377
	0.0603	-0.0116	-0.00313	0.01519	0.0392953	3	0.0226871
	0.0605	-0.00811	-0.00289	0.0165	0.0381944	3	0.0220515
	0.059	-0.00877	-0.00205	0.01606	0.0373386	3	0.0215575
	0.06	-0.00542	-0.00233	0.0174167	0.0369106	3	0.0213103
	0.0576	-0.00668	-0.00295	0.01599	0.0360835	3	0.0208328
	0.0578	-0.00352	-0.00307	0.01707	0.0352739	3	0.0203654
	0.0569	-0.00325	-0.00284	0.0169367	0.0346099	3	0.019982
	0.0557	-0.00268	-0.00279	0.0167433	0.0337375	3	0.0194784
	0.0525	-0.00192	-0.0029	0.0158933	0.0317061	3	0.0183055
	0.0525	-0.00177	-0.00263	0.0160333	0.031584	3	0.018235
	0.0534	0.000729	-0.00236	0.0172563	0.0313394	3	0.0180938
	0.0546	0.000314	-0.0028	0.0173713	0.0322785	3	0.018636
	0.0551	0.000977	-0.003	0.0176923	0.032457	3	0.018739
	0.0521	0.005346	-0.00287	0.018192	0.0296511	3	0.0171191
	0.0542	0.003229	-0.0023	0.0183763	0.0311471	3	0.0179828
	0.0531	0.005397	-0.0031	0.0184657	0.0302936	3	0.01749
	0.0531	0.001475	-0.0028	0.0172583	0.0311133	3	0.0179633
	0.05	0.005899	-0.00268	0.0177397	0.0282656	3	0.0163192
	0.0514	0.002721	-0.0024	0.0172403	0.0296937	3	0.0171437
	0.0487	0.004081	-0.00246	0.0167737	0.0278418	3	0.0160745
	0.0478	0.007428	-0.00222	0.0176693	0.0265361	3	0.0153206
	0.0488	0.004785	-0.00232	0.0170883	0.0276919	3	0.0159879
	0.0487	0.004844	-0.00285	0.016898	0.0278087	3	0.0160554
	0.0469	0.006553	-0.00244	0.0170043	0.026278	3	0.0151716
	0.0473	0.004266	-0.00295	0.0162053	0.0271694	3	0.0156863
	0.0445	0.009386	-0.00267	0.017072	0.0245063	3	0.0141487
	0.0445	0.00921	-0.00252	0.0170633	0.024474	3	0.0141301
	0.0455	0.009549	-0.00263	0.017473	0.0250243	3	0.0144478
	0.0434	0.00675	-0.00255	0.0158667	0.0242937	3	0.014026
	0.0429	0.008303	-0.00218	0.016341	0.0235904	3	0.0136199
	0.0434	0.0108	-0.00221	0.01733	0.0234957	3	0.0135653
	0.0436	0.007635	-0.00212	0.0163717	0.0240796	3	0.0139024
	0.0432	0.006541	-0.00276	0.0156603	0.0242992	3	0.0140292
	0.0438	0.008603	-0.00327	0.0163777	0.0244792	3	0.0141331
	0.0411	0.007502	-0.00313	0.0151573	0.0230874	3	0.0133295
	0.0432	0.01	-0.00304	0.01672	0.0238412	3	0.0137647
	0.0431	0.008066	-0.00257	0.0161987	0.0238965	3	0.0137966
	0.0447	0.004572	-0.0029	0.0154573	0.025599	3	0.0147796
	0.041	0.00621	-0.00244	0.0149233	0.0229935	3	0.0132753
	0.0434	0.006696	-0.00191	0.016062	0.0240633	3	0.0138929
	0.0412	0.008537	-0.0029	0.0156123	0.0228855	3	0.013213
	0.04	0.005147	-0.00257	0.0141923	0.0226807	3	0.0130947
	0.0376	0.005026	-0.00283	0.0132653	0.0214374	3	0.0123769
	0.0377	0.005394	-0.00287	0.013408	0.0214394	3	0.0123781
	0.0407	0.004664	-0.00254	0.0142747	0.0231667	3	0.0133753
	0.0388	0.005574	-0.00228	0.0140313	0.0218068	3	0.0125902
	0.0372	0.005253	-0.00233	0.0133743	0.0209791	3	0.0121123
	0.0376	0.003741	-0.00286	0.012827	0.0217064	3	0.0125322
	0.0378	0.003874	-0.00304	0.012878	0.0218582	3	0.0126198
	0.0353	0.003768	-0.00326	0.011936	0.0205367	3	0.0118569
	0.0376	0.007023	-0.00204	0.0141943	0.0207703	3	0.0119917
	0.0366	0.006529	-0.00273	0.0134663	0.0205623	3	0.0118716
	0.0375	0.00248	-0.00217	0.0126033	0.0216861	3	0.0125205
	0.0387	0.005677	-0.00219	0.0140623	0.0216964	3	0.0125264
	0.038	0.005068	-0.00227	0.0135993	0.0214477	3	0.0123829
	0.0369	0.004433	-0.00237	0.0129877	0.0209862	3	0.0121164
	0.0354	0.004407	-0.0025	0.0124357	0.0201853	3	0.011654
	0.0357	0.006695	-0.0024	0.0133317	0.0198982	3	0.0114882
	0.0364	0.004678	-0.00277	0.0127693	0.0208008	3	0.0120094
	0.0347	0.006731	-0.0029	0.0128437	0.0195311	3	0.0112763
	0.0361	0.00573	-0.00314	0.0128967	0.0205783	3	0.0118809
	0.0338	0.00485	-0.00251	0.0120467	0.019195	3	0.0110822
	0.0338	0.006176	-0.00263	0.0124487	0.0190078	3	0.0109742
	0.0334	0.004403	-0.00289	0.0116377	0.0191963	3	0.011083
	0.0331	0.004393	-0.00345	0.0113477	0.0192419	3	0.0111093
	0.0325	0.009102	-0.00326	0.0127807	0.0181616	3	0.0104856
	0.0324	0.00323	-0.00229	0.0111133	0.0186403	3	0.010762
	0.0348	0.003082	-0.00319	0.011564	0.0203659	3	0.0117582
	0.0336	0.004422	-0.00258	0.011814	0.0191893	3	0.0110789
	0.0317	0.001676	-0.00285	0.0101753	0.0187778	3	0.0108414
	0.0306	0.003162	-0.00287	0.0102973	0.0178394	3	0.0102996
	0.0323	0.002284	-0.00231	0.010758	0.0187968	3	0.0108523
	0.0315	0.002327	-0.00281	0.010339	0.0185051	3	0.0106839
	0.03	0.000554	-0.00304	0.00917133	0.0181274	3	0.0104659
	0.03	0.002682	-0.00286	0.00994067	0.0175915	3	0.0101565
	0.0298	0.001132	-0.0031	0.00927733	0.0178987	3	0.0103338
	0.0309	0.002574	-0.00303	0.010148	0.0181889	3	0.0105014
	0.0295	0.003837	-0.00295	0.010129	0.0171156	3	0.00988168
	0.0286	-0.00134	-0.00252	0.00824667	0.0176364	3	0.0101824
	0.0303	-0.00037	-0.00305	0.00896	0.0185295	3	0.010698
	0.0279	0.002115	-0.00346	0.00885167	0.0167302	3	0.00965918
	0.0274	-0.00079	-0.0032	0.00780333	0.0170139	3	0.009823
	0.0292	-0.00135	-0.003	0.00828333	0.0181331	3	0.0104692
	0.0276	0.002692	-0.00269	0.00920067	0.0161599	3	0.00932994
	0.0269	-0.00026	-0.00279	0.00795	0.0164599	3	0.00950311
	0.0281	0.000223	-0.00261	0.008571	0.0169718	3	0.00979869
	0.0265	0.002283	-0.00293	0.00861767	0.0157044	3	0.00906692
	0.0271	-0.00158	-0.00324	0.00742667	0.0170578	3	0.00984833
	0.0281	0.001382	-0.00289	0.008864	0.0167952	3	0.00969674
	0.0279	0.001444	-0.00228	0.00902133	0.0164551	3	0.00950035
	0.0285	0.00319	-0.0025	0.00973	0.0165024	3	0.00952766
	0.0261	0.002541	-0.00263	0.00867033	0.0153144	3	0.00884175
	0.0269	0.001481	-0.00264	0.00858033	0.0159985	3	0.00923676
	0.0261	-0.00119	-0.00337	0.00718	0.0164214	3	0.00948091
	0.0256	-0.00071	-0.00311	0.00726	0.0159282	3	0.00919614
	0.0277	-0.00015	-0.00324	0.00810333	0.0170414	3	0.00983885
	0.0265	0.000106	-0.00294	0.00788867	0.0161897	3	0.00934712
	0.0241	-0.00148	-0.00318	0.00648	0.015283	3	0.00882366
	0.0267	-0.0029	-0.00292	0.00696	0.0170953	3	0.00987
	0.0253	-0.00356	-0.00297	0.00625667	0.0164946	3	0.00952319
	0.0246	-0.00168	-0.0025	0.00680667	0.0154149	3	0.00889982
	0.0281	-0.00133	-0.00316	0.00787	0.0175436	3	0.0101288
	0.0258	-0.00135	-0.00229	0.00738667	0.0159533	3	0.00921066
	0.0233	-0.00183	-0.00296	0.00617	0.0148458	3	0.00857121
	0.0246	-0.00305	-0.00304	0.00617	0.0159608	3	0.009215
	0.0223	-0.0033	-0.00319	0.00527	0.0147485	3	0.00851506
	0.023	-0.00242	-0.00331	0.00575667	0.0149398	3	0.00862549
	0.0248	-0.00292	-0.0033	0.00619333	0.016115	3	0.00930398
	0.0226	-0.00288	-0.00347	0.00541667	0.0148841	3	0.00859335
	0.0241	-0.00267	-0.00277	0.00622	0.0154846	3	0.00894005
	0.0226	-0.00347	-0.00291	0.00540667	0.0148925	3	0.00859819
	0.0234	-0.00194	-0.00346	0.006	0.015088	3	0.00871106
	0.0213	-0.00233	-0.00379	0.00506	0.0140832	3	0.00813093
	0.0227	-0.00252	-0.0035	0.00556	0.0148518	3	0.00857467
	0.0208	-0.00236	-0.00249	0.00531667	0.0134091	3	0.00774176
	0.021	-0.00143	-0.00337	0.0054	0.0135448	3	0.00782008
	0.0213	-0.00263	-0.00328	0.00513	0.0140074	3	0.00808718
	0.0199	-0.004	-0.00381	0.00403	0.0137442	3	0.00793519
	0.0208	-0.00318	-0.00329	0.00477667	0.0138767	3	0.00801173
	0.0206	-0.00359	-0.00246	0.00485	0.0136516	3	0.00788175
	0.0212	-0.00332	-0.00325	0.00487667	0.0141365	3	0.00816169
	0.0205	-0.00336	-0.00328	0.00462	0.0137525	3	0.00794003
	0.0204	-0.00226	-0.00322	0.00497333	0.0133685	3	0.00771831
	0.019	-0.00276	-0.00314	0.00436667	0.0126743	3	0.00731749
	0.0202	-0.00351	-0.00301	0.00456	0.0135469	3	0.00782133
	0.0201	-0.00209	-0.00266	0.00511667	0.0129791	3	0.00749347
	0.0217	-0.00299	-0.00242	0.00543	0.0140931	3	0.00813666
	0.0188	-0.00108	-0.00302	0.0049	0.0120768	3	0.00697253
	0.0198	-0.00219	-0.00247	0.00504667	0.0127775	3	0.00737711
	0.0203	-0.00372	-0.00333	0.00441667	0.0137568	3	0.00794246
	0.0197	-0.0026	-0.0026	0.00483333	0.0128749	3	0.00743333
	0.0189	-0.00288	-0.00288	0.00438	0.0125747	3	0.00726
	0.0185	-0.00348	-0.003	0.00400667	0.0125539	3	0.00724799
	0.0197	-0.005	-0.00291	0.00393	0.0136971	3	0.00790805
	0.018	-0.00238	-0.00288	0.00424667	0.0119134	3	0.00687818
	0.0178	-0.00518	-0.00293	0.00323	0.012668	3	0.0073139
	0.0167	-0.00297	-0.00304	0.00356333	0.0113767	3	0.00656836
	0.0186	-0.00411	-0.00277	0.00390667	0.0127424	3	0.00735684
	0.0184	-0.0048	-0.00241	0.00373	0.0127607	3	0.00736738
	0.0184	-0.00442	-0.00242	0.00385333	0.0126374	3	0.00729621
	0.0184	-0.00456	-0.00288	0.00365333	0.0127986	3	0.00738927
	0.0169	-0.00349	-0.00248	0.00364333	0.0114917	3	0.00663474
	0.0175	-0.00558	-0.00203	0.00329667	0.0124279	3	0.00717523
	0.018	-0.00431	-0.00191	0.00392667	0.0122468	3	0.00707069
	0.0166	-0.00404	-0.00253	0.00334333	0.0115054	3	0.00664265
	0.0159	-0.00593	-0.002	0.00265667	0.0116362	3	0.00671815
	0.0165	-0.00674	-0.00201	0.00258333	0.012282	3	0.00709104
	0.0161	-0.00566	-0.00187	0.00285667	0.0116246	3	0.00671144
	0.0142	-0.00313	-0.00239	0.00289333	0.00979885	3	0.00565737
	0.0151	-0.00474	-0.0019	0.00282	0.0107292	3	0.00619449
	0.0163	-0.00529	-0.00163	0.00312667	0.0115543	3	0.00667087
	0.016	-0.00575	-0.0018	0.00281667	0.0115867	3	0.00668956
	0.0158	-0.00518	-0.00164	0.00299333	0.0112312	3	0.00648436
	0.0143	-0.00365	-0.00153	0.00304	0.00980889	3	0.00566316
	0.0146	-0.00451	-0.00154	0.00285	0.0102836	3	0.00593723
	0.0151	-0.00479	-0.00141	0.00296667	0.0106428	3	0.00614463
	0.0143	-0.00418	-0.00104	0.00302667	0.00988842	3	0.00570908
	0.0153	-0.005	-0.00133	0.00299	0.0108175	3	0.00624551
	0.0137	-0.0041	-0.00166	0.00264667	0.0096499	3	0.00557137
	0.014	-0.00354	-0.00143	0.00301	0.00957591	3	0.00552866
	0.0141	-0.00376	-0.00146	0.00296	0.00971582	3	0.00560943
	0.014	-0.00326	-0.00127	0.00315667	0.00944317	3	0.00545202
	0.0129	-0.00429	-0.00116	0.00248333	0.00915584	3	0.00528613
	0.0133	-0.00456	-0.00077	0.00265667	0.00941018	3	0.00543297
	0.013	-0.00295	-0.00109	0.00298667	0.00872153	3	0.00503538
	0.0139	-0.00469	-0.00103	0.00272667	0.00984792	3	0.0056857
	0.0128	-0.00489	-0.00057	0.00244667	0.00922276	3	0.00532476
	0.0137	-0.00335	-0.00139	0.00298667	0.00932963	3	0.00538647
	0.013	-0.00562	-0.00063	0.00225	0.0096383	3	0.00556468
	0.0121	-0.00505	-0.00142	0.00187667	0.00903779	3	0.00521797
	0.0131	-0.00504	-0.00062	0.00248	0.00945899	3	0.00546115
	0.0119	-0.00342	-0.0006	0.00262667	0.00815378	3	0.00470759
	0.0115	-0.00372	-0.00083	0.00231667	0.00808321	3	0.00466684
	0.0116	-0.00468	-0.00032	0.0022	0.00842748	3	0.00486561
	0.0124	-0.00481	-0.0003	0.00243	0.00892388	3	0.00515221
	0.0119	-0.00371	-0.00088	0.00243667	0.00831674	3	0.00480167
	0.0114	-0.00298	-0.00048	0.00264667	0.00768298	3	0.00443577
	0.0114	-0.0041	-0.00087	0.00214333	0.00817757	3	0.00472132
	0.0118	-0.00355	-0.00089	0.00245333	0.00820299	3	0.004736
	0.012	-0.00438	-0.00052	0.00236667	0.00856304	3	0.00494388
	0.0106	-0.00414	-0.00094	0.00184	0.00775327	3	0.00447635
	0.0115	-0.00505	-0.00103	0.00180667	0.00863195	3	0.00498366
	0.0108	-0.00427	-0.00079	0.00191333	0.00789033	3	0.00455548
	0.0107	-0.00465	-0.00079	0.00175333	0.0079848	3	0.00461003
	0.0108	-0.00425	-0.00097	0.00186	0.00791406	3	0.00456918
	0.0109	-0.00365	-0.00071	0.00218	0.00769348	3	0.00444184
	0.0108	-0.005	-0.00082	0.00166	0.00818675	3	0.00472662
	0.009616	-0.00524	-0.00084	0.00117867	0.00763095	3	0.00440573
	0.0105	-0.006	-0.00068	0.00127333	0.00842165	3	0.00486224
	0.0101	-0.00522	-0.00074	0.00138	0.00787695	3	0.00454776
	0.0106	-0.00474	-0.00085	0.00167	0.00797444	3	0.00460405
	0.0103	-0.00486	-0.00079	0.00155	0.00784622	3	0.00453001
	0.009631	-0.00494	-0.00061	0.00136033	0.00748266	3	0.00432011
	0.009758	-0.0042	-0.00095	0.001536	0.00730353	3	0.0042167
	0.009245	-0.00603	-0.00097	0.000748333	0.00778113	3	0.00449243
	0.008763	-0.00436	-0.00076	0.00121433	0.00678062	3	0.00391479
	0.009322	-0.00467	-0.00048	0.00139067	0.00718113	3	0.00414602
	0.009922	-0.00523	-0.00087	0.001274	0.00780021	3	0.00450346
	0.009797	-0.00424	-0.00072	0.00161233	0.00730337	3	0.0042166
	0.00899	-0.00449	-0.00098	0.00117333	0.00699323	3	0.00403754
	0.008547	-0.00423	-0.00086	0.00115233	0.00662194	3	0.00382318
	0.009172	-0.0046	-0.00089	0.00122733	0.00712596	3	0.00411418
	0.009045	-0.00363	-0.00048	0.001645	0.00659929	3	0.0038101
	0.008406	-0.00455	-0.00076	0.001032	0.0066613	3	0.0038459
	0.008839	-0.00603	-0.00077	0.000679667	0.00753976	3	0.00435308
	0.007689	-0.00582	-0.00059	0.000426333	0.00681161	3	0.00393268
	0.008113	-0.00567	-0.00066	0.000594333	0.00697659	3	0.00402794
	0.008047	-0.00372	-0.00045	0.00129233	0.00607391	3	0.00350677

## Sheet: Fig 4A
	Time (min)rel ICBa	Rel IBa
	-0.95	1.00679
	-0.9	0.950049
	-0.85	0.946656
	-0.8	0.981947
	-0.75	0.95338
	-0.7	0.981588
	-0.65	0.973815
	-0.6	0.983602
	-0.55	0.963962
	-0.5	0.9709
	-0.45	0.971577
	-0.4	0.986381
	-0.35	0.982012
	-0.3	0.948456
	-0.25	1.01321
	-0.2	0.997653
	-0.15	0.98479
	-0.1	0.995722
	-0.05	1.00737
	1.11022e-16	1
	0.05	0.955829
	0.1	0.94959
	0.15	0.943676
	0.2	0.956521
	0.25	0.91072
	0.3	0.923879
	0.35	0.914357
	0.4	0.910211
	0.45	0.889393
	0.5	0.869492
	0.55	0.871394
	0.6	0.819634
	0.65	0.845047
	0.7	0.801374
	0.75	0.81246
	0.8	0.796322
	0.85	0.802267
	0.9	0.78934
	0.95	0.747724
	1	0.760863
	1.05	0.730498
	1.1	0.731035
	1.15	0.738407
	1.2	0.720132
	1.25	0.722439
	1.3	0.712838
	1.35	0.712608
	1.4	0.688382
	1.45	0.696972
	1.5	0.683611
	1.55	0.661968
	1.6	0.663581
	1.65	0.664992
	1.7	0.673131
	1.75	0.678752
	1.8	0.654782
	1.85	0.666437
	1.9	0.6326
	1.95	0.622037
	2	0.596732
	2.05	0.618102
	2.1	0.616491
	2.15	0.608729
	2.2	0.590873
	2.25	0.588328
	2.3	0.59756
	2.35	0.567099
	2.4	0.538339
	2.45	0.564084
	2.5	0.565909
	2.55	0.56925
	2.6	0.570014
	2.65	0.537354
	2.7	0.51855
	2.75	0.525021
	2.8	0.50867
	2.85	0.539506
	2.9	0.515619
	2.95	0.50638
	3	0.524421
	3.05	0.521997
	3.1	0.488183
	3.15	0.495509
	3.2	0.500022
	3.25	0.493102
	3.3	0.475658
	3.35	0.481969
	3.4	0.464731
	3.45	0.47963
	3.5	0.480354
	3.55	0.482456
	3.6	0.471102
	3.65	0.462326
	3.7	0.457633
	3.75	0.445667
	3.8	0.470563
	3.85	0.450582
	3.9	0.438281
	3.95	0.433854
	4	0.435458
	4.05	0.421093
	4.1	0.428475
	4.15	0.427383
	4.2	0.424929
	4.25	0.409951
	4.3	0.421727
	4.35	0.427383
	4.4	0.408057
	4.45	0.407502
	4.5	0.396441
	4.55	0.398534
	4.6	0.396922
	4.65	0.389662
	4.7	0.397912
	4.75	0.400739
	4.8	0.38318
	4.85	0.380495
	4.9	0.393897
	4.95	0.375329
	5	0.364901
	5.05	0.379256
	5.1	0.374306
	5.15	0.354621
	5.2	0.362629
	5.25	0.367699
	5.3	0.363029
	5.35	0.356203
	5.4	0.35901
	5.45	0.361719
	5.5	0.361026
	5.55	0.373495
	5.6	0.364013
	5.65	0.36385
	5.7	0.354759
	5.75	0.376341
	5.8	0.377948
	5.85	0.371993
	5.9	0.365606
	5.95	0.362302
	6	0.355445
	6.05	0.370403
	6.1	0.368566
	6.15	0.357495
	6.2	0.357495
	6.25	0.351934
	6.3	0.352136
	6.35	0.349767
	6.4	0.338577
	6.45	0.34867
	6.5	0.354686
	6.55	0.368065
	6.6	0.358421
	6.65	0.357168
	6.7	0.354257
	6.75	0.336775
	6.8	0.366347
	6.85	0.349904
	6.9	0.345402
	6.95	0.340585
	7	0.345612
	7.05	0.350272
	7.1	0.331989
	7.15	0.338908
	7.2	0.33525
	7.25	0.341006
	7.3	0.333657
	7.35	0.350396
	7.4	0.340679
	7.45	0.327913
	7.5	0.323704
	7.55	0.335125
	7.6	0.326703
	7.65	0.320931
	7.7	0.331298
	7.75	0.329696
	7.8	0.326481
	7.85	0.324291
	7.9	0.321745
	7.95	0.313776
	8	0.320381
	8.05	0.311402
	8.1	0.324729
	8.15	0.309142
	8.2	0.309006
	8.25	0.302424
	8.3	0.313131
	8.35	0.299764
	8.4	0.307247
	8.45	0.352819
	8.5	0.299551
	8.55	0.311161
	8.6	0.303593
	8.65	0.297519
	8.7	0.296498
	8.75	0.284097
	8.8	0.307402
	8.85	0.297821
	8.9	0.284159
	8.95	0.281652
	9	0.288282
	9.05	0.294674
	9.1	0.297005
	9.15	0.282581
	9.2	0.279978
	9.25	0.287132
	9.3	0.286116
	9.35	0.287803
	9.4	0.276309
	9.45	0.293156
	9.5	0.27441
	9.55	0.27252
	9.6	0.274306
	9.65	0.284477
	9.7	0.294251
	9.75	0.286457
	9.8	0.273531
	9.85	0.288177
	9.9	0.275102
	9.95	0.276374
	10	0.28259
	10.05	0.263672
	10.1	0.271202
	10.15	0.274926
	10.2	0.283932
	10.25	0.275237
	10.3	0.272555
	10.35	0.285465
	10.4	0.279519
	10.45	0.282131
	10.5	0.271891
	10.55	0.27305
	10.6	0.277503
	10.65	0.259892
	10.7	0.270711
	10.75	0.261006
	10.8	0.263635
	10.85	0.264206
	10.9	0.263449
	10.95	0.260357
	11	0.264497
	11.05	0.263613
	11.1	0.266237
	11.15	0.256317
	11.2	0.260132
	11.25	0.263576
	11.3	0.257324
	11.35	0.254757
	11.4	0.269244
	11.45	0.265384
	11.5	0.254442
	11.55	0.273527
	11.6	0.257499
	11.65	0.254813
	11.7	0.255797
	11.75	0.25243
	11.8	0.247483
	11.85	0.249803
	11.9	0.24561
	11.95	0.242129
	12	0.247428
	12.05	0.247025
	12.1	0.253622
	12.15	0.247239
	12.2	0.238203
	12.25	0.234164
	12.3	0.244816
	12.35	0.245315
	12.4	0.23027
	12.45	0.229566
	12.5	0.242944
	12.55	0.237413
	12.6	0.240473
	12.65	0.233491
	12.7	0.234104
	12.75	0.238486
	12.8	0.228684
	12.85	0.226884
	12.9	0.225853
	12.95	0.233916
	13	0.226612
	13.05	0.230045
	13.1	0.226955
	13.15	0.215541
	13.2	0.223833
	13.25	0.220203
	13.3	0.214236
	13.35	0.210124
	13.4	0.212312
	13.45	0.205713
	13.5	0.212306
	13.55	0.215628
	13.6	0.205102
	13.65	0.217647
	13.7	0.204535
	13.75	0.203401
	13.8	0.199622
	13.85	0.208795
	13.9	0.205479
	13.95	0.210644
	14	0.219634
	14.05	0.210627
	14.1	0.213149
	14.15	0.205768
	14.2	0.202939
	14.25	0.201729
	14.3	0.203527
	14.35	0.203541
	14.4	0.205975
	14.45	0.201409
	14.5	0.210938
	14.55	0.214361
	14.6	0.197348
	14.65	0.19308
	14.7	0.208161
	14.75	0.203067
	14.8	0.196493
	14.85	0.208026
	14.9	0.197891
	14.95	0.205848
	15	0.192874
	15.05	0.194953
	15.1	0.19218
	15.15	0.193032
	15.2	0.199677
	15.25	0.19725
	15.3	0.188582
	15.35	0.192341
	15.4	0.196841
	15.45	0.191545
	15.5	0.187953
	15.55	0.188809
	15.6	0.189937
	15.65	0.187773
	15.7	0.198573
	15.75	0.188388
	15.8	0.179265
	15.85	0.201645
	15.9	0.186983
	15.95	0.184208
	16	0.188309
	16.05	0.193916
	16.1	0.181636
	16.15	0.183821
	16.2	0.183109
	16.25	0.201597
	16.3	0.190382
	16.35	0.177924
	16.4	0.182902
	16.45	0.175903
	16.5	0.181348
	16.55	0.168087
	16.6	0.174388
	16.65	0.181636
	16.7	0.181785
	16.75	0.176561
	16.8	0.175871
	16.85	0.17473
	16.9	0.172695
	16.95	0.166425
	17	0.179993
	17.05	0.174175
	17.1	0.168118
	17.15	0.175949
	17.2	0.173316
	17.25	0.163991
	17.3	0.170658
	17.35	0.168787
	17.4	0.164482
	17.45	0.162051
	17.5	0.159773
	17.55	0.169444
	17.6	0.162786
	17.65	0.165629
	17.7	0.170761
	17.75	0.167922
	17.8	0.161071
	17.85	0.166865
	17.9	0.161244
	17.95	0.160872
	18	0.168338
	18.05	0.158138
	18.1	0.154761
	18.15	0.168558
	18.2	0.162005
	18.25	0.159817
	18.3	0.157675
	18.35	0.158947
	18.4	0.158118
	18.45	0.163447
	18.5	0.160112
	18.55	0.168583
	18.6	0.156792
	18.65	0.162392
	18.7	0.158359
	18.75	0.160902
	18.8	0.148134
	18.85	0.152476
	18.9	0.150533
	18.95	0.157505
	19	0.155637
	19.05	0.143485
	19.1	0.142295
	19.15	0.152993
	19.2	0.154277
	19.25	0.149375
	19.3	0.144438
	19.35	0.1519
	19.4	0.143863
	19.45	0.146266
	19.5	0.145323
	19.55	0.14197
	19.6	0.144214
	19.65	0.14893
	19.7	0.151587
	19.75	0.147554
	19.8	0.155368
	19.85	0.149743
	19.9	0.140627
	19.95	0.153941
	20	0.15735
	20.05	0.157232
	20.1	0.149762

## Sheet: Fig 4B
	mouse SCG
	external: 150 TEA-Cl, 5 BaCl2, 1 MgCl2, 10HEPES, pH 7.4 w TEA-OH + ADD 1 uM TTX and 5 uM Nimodipine
	internal: 130 CsCl, 5 MgCl2, 10 EGTA, 10 HEPES, pH 7.4 w CsOH + Reg sol w GTP
	hp -100 to 10 mV, 0.33Hz
				ICav-ICavL	10 uM CNCB-2		30 uM CNCB-2
	19710017	p16	15.8pF, 3.6mohm	400 pA	swp 16~58		swp 102~164
	hp -70 to 10 mV, 0.33Hz
				ICav-ICavL (pA)	3 uM CNCB-2	Relative Icav	After 5 min wash-out
	19719003	p16	14.6pf, 3.5mohm,	190	s10~s114	0.74	0.56
	19719011	p16	11.5pF, 4mohm	250	s24~s134	0.56	0.41
	19719016	p16	9pF, 2.3mohm	310	s13~s124	0.5	0.36
	19723009	p16	13.7pF, 3mohm	436	s24~s128	0.63	0.56
	19723015	p16	12pF, 5.8mohm	248	s18~s114	0.43	0.32
						0.572
						0.119457
						0.0534245
				ICav-ICavL (pA)	10 uM CNCB-2	Relative Icav	After 5 min wash-out
	19716014	p16	12pF, 3.1mohm	810	s11~s57	0.38
	19717023	p18	10.5pF, 1.7mohm	362	s26~s129	0.3	0.21
	19717027	p18	9pF, 2.3mohm	371	s18~126	0.4	0.3
	19718008	p16	9.5pF, 3.6mohm	628	s20~s129	0.36	0.27
	19718012	p16	7.7pF, 7mohm	200	s19~s127	0.04	0
	19718017	p16		240	s22~s127	0.45	0.46
						0.31
						0.160624
						0.0718353
	hp -70 to 10 mV, 0.33Hz
				ICav-ICavL (pA)	30 uM CNCB-2	Relative Icav	After 5 min wash-out
	19724002	p16	15.5pF, 4mohm	170	s25~s142	0.3	0.27
	19724009	p16	13pF, 3.2mohm	280	s34~s145	0.1	0.1
	19724025	p16	14.8pF, 3.2mohm	110	s16~s129	0.28	0.3
	19805004	p13	7.3pF, 3.2mohm	220	s29~s134	0.14	0.13
	19805013	p13	12.6pF, 4.7mohm	260	s19~s143	0.2	0.35
	19805004	p13	15.7pf, 5.9mohm	170	s16~s152	0.3	0.15
						0.22
						0.0867179
						0.0354095

[truncated: 16 more sheets: Fig 5A, Fig 5B, Fig 5C, Fig 6A, Fig 6B, Fig 6C, Fig 6D, Fig 7A, Fig 7B, Fig8A, Fig8B, Fig9A, Fig9B, Fig 9C, Fig 10A CGRP, Fig 10B Asthma]
